# Supplementary material for: Meta-analysis of gene expression studies in endometrial cancer identifies gene expression profiles associated with aggressive disease and patient outcome
Source: PubMed Central journal article supplement (PMC5103206; doi:10.1038/srep36677), 2016-11-10
Supplement: srep36677-s1.pdf [file srep36677-s1.pdf]

**Supplementary information for:**

**Meta-analysis of gene expression studies in endometrial cancer identifies gene expression profiles associated with aggressive disease and patient outcome.**

Tracy A O'Mara<sup>1\*</sup>, Min Zhao<sup>2</sup>, Amanda B Spurdle<sup>1</sup>

<sup>1</sup>Genetics and Computational Biology Department, QIMR Berghofer Medical Research Institute, Herston, QLD 4006, Australia

<sup>2</sup>School of Engineering, Faculty of Science, Health, Education and Engineering, University of the Sunshine Coast, Queensland, 4558, Australia

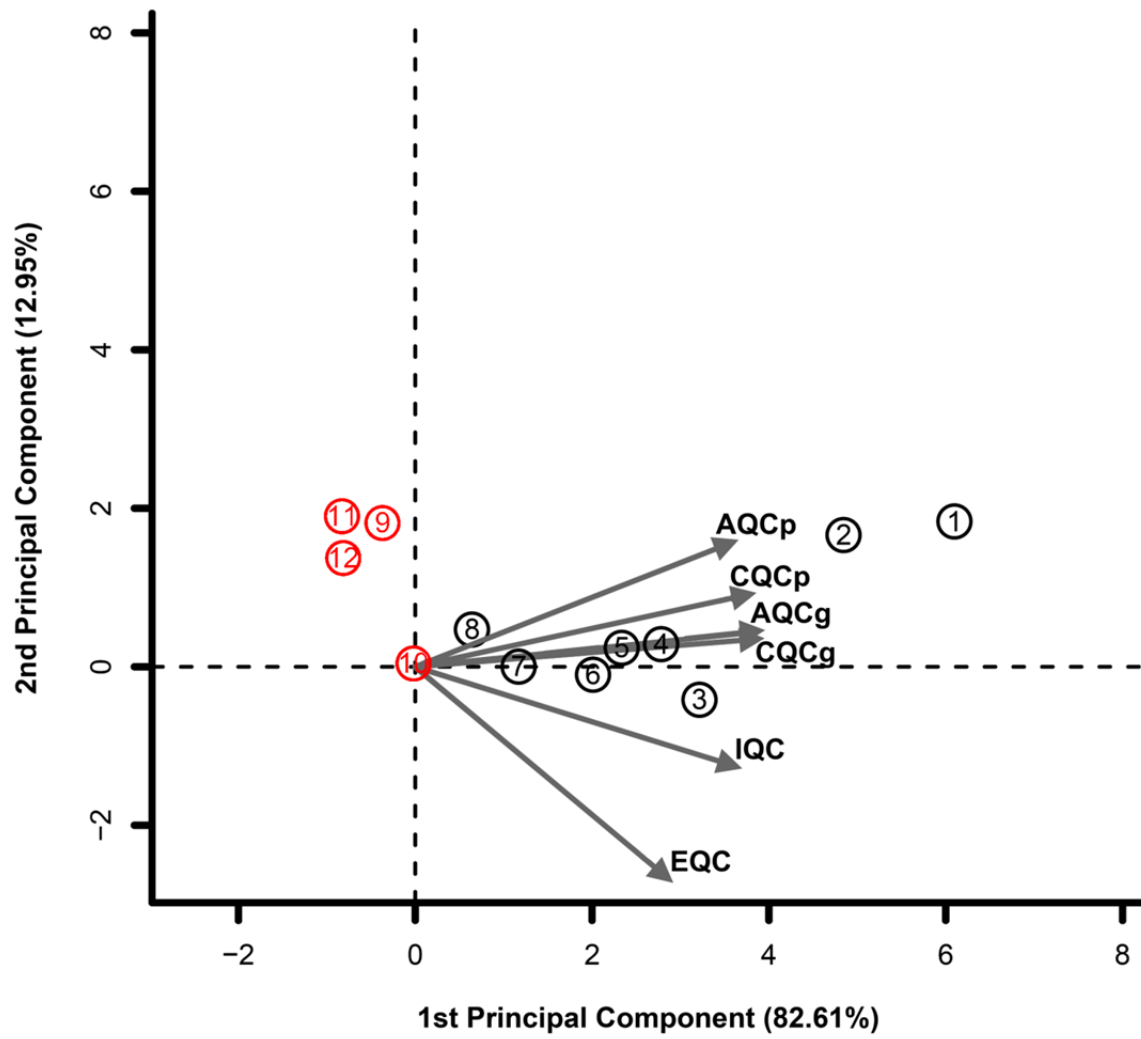

**Supplementary Figure 1.** Principal components analysis using co-expression and reproducibility estimates from MetaQC quality control analysis of 12 microarray studies. Studies highlighted in red were excluded from the final microarray meta-analysis. Study ID can be found in Table 1.

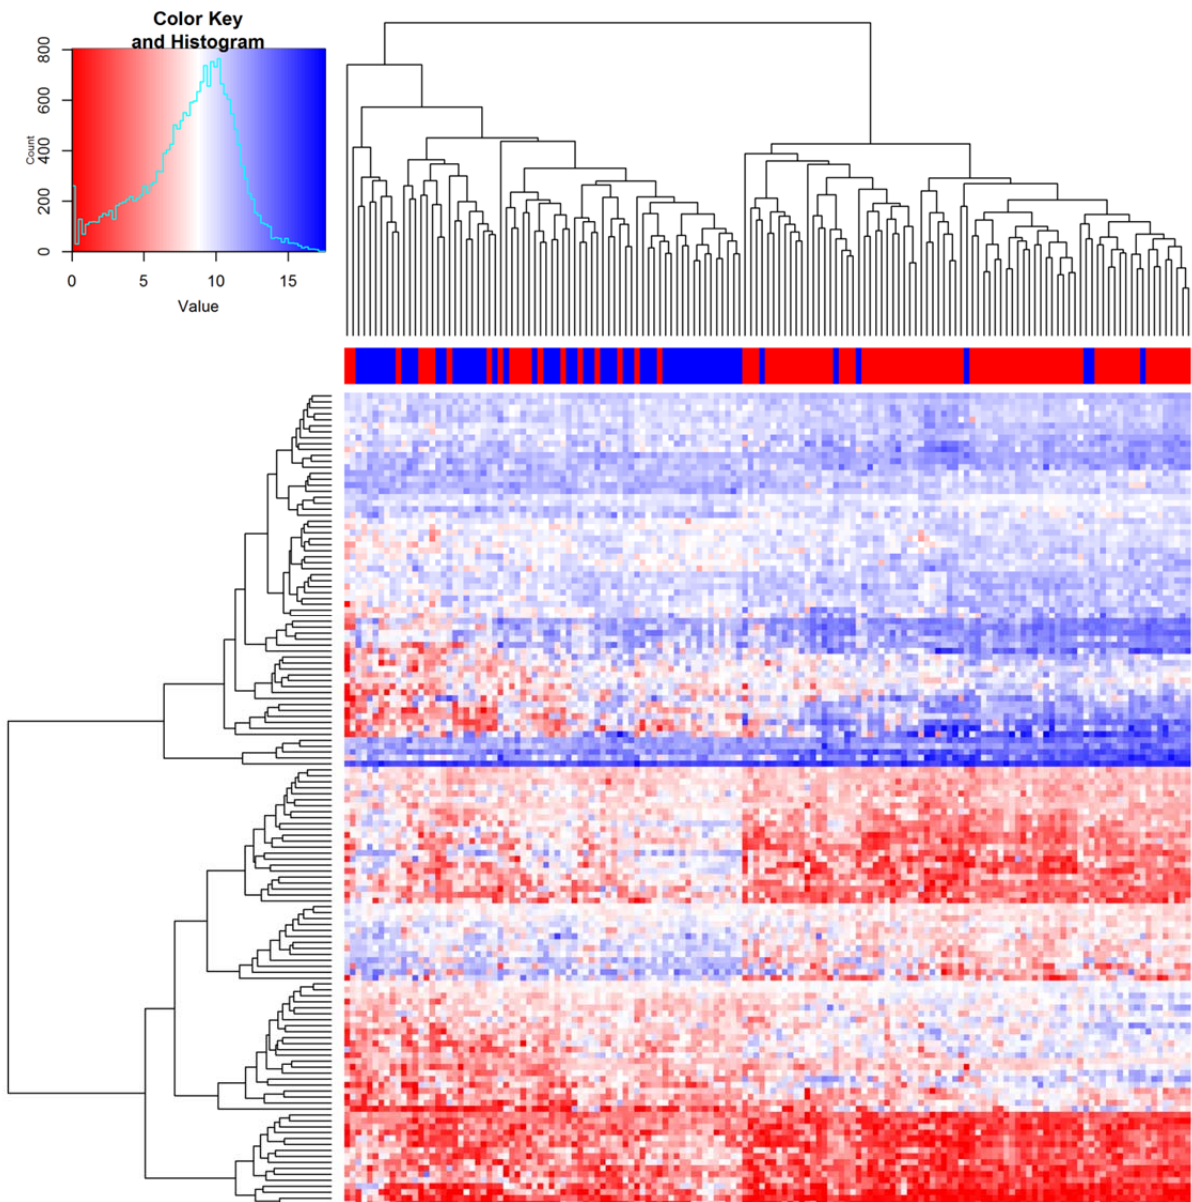

**Supplementary Figure 2. Gene expression patterns in endometrial cancer patients using RNA-Seq HiSeq data from The Cancer Genome Atlas.** Unsupervised hierarchical clustering and heatmap showing individual expression pattern in 145 most significantly differentially expressed genes identified by microarray meta-analysis. Patient subgroup (NEEC - blue, EEC - red) is depicted by the bar across the top of the heat map. Normalized expression value is displayed by the heatmap, where blue represents upregulated genes and red represents downregulated genes. EEC - endometrioid endometrial cancer; NEEC - non-endometrioid endometrial cancer.

**Supplementary Table 1. Quality control measures assessing microarray studies suitability for inclusion in meta-analysis. Italicised studies were excluded from final analysis.**

| Study No. | Study/Accession No. | Internal Quality Control Score | External Quality Control Score | Consistency Quality Control Score (genes) | Consistency Quality Control Score (pathways) | Accuracy Quality Control Score (genes) | Accuracy Quality Control Score (pathways) | Quality Control Rank |
|-----------|---------------------|--------------------------------|--------------------------------|-------------------------------------------|----------------------------------------------|----------------------------------------|-------------------------------------------|----------------------|
| 1         | E-MTAB-2532         | 8.09                           | 2.82                           | 142.37                                    | 137.48                                       | 67.18                                  | 69.96                                     | 1.67                 |
| 2         | E-GEOD-2109         | 7                              | 2.69                           | 105.1                                     | 136.08                                       | 40.36                                  | 63.32                                     | 2.83                 |
| 3         | E-GEOD-56026        | 8                              | 3.4                            | 92.17                                     | 48.3                                         | 31.59                                  | 16.73                                     | 3.33                 |
| 4         | E-GEOD-24537        | 6.34                           | 2.9                            | 58.99                                     | 56.27                                        | 30.23                                  | 27.77                                     | 3.83                 |
| 5         | E-GEOD-23518        | 4.52                           | 2.96                           | 68.86                                     | 52.77                                        | 27.01                                  | 16.9                                      | 4.5                  |
| 6         | TCGA                | 4.59                           | 3.22                           | 45.46                                     | 50.95                                        | 22.49                                  | 13.04                                     | 5.33                 |
| 7         | E-GEOD-17025        | 5.39                           | 2.49                           | 17.96                                     | 26.47                                        | 8.47                                   | 14.47                                     | 6.83                 |
| 8         | E-GEOD-32507        | 4.43                           | 1.72                           | 14.54                                     | 24.37                                        | 6.59                                   | 9.24                                      | 8.67                 |
| 9         | <i>Shedden</i>      | <i>1.05</i>                    | <i>0.07</i>                    | <i>20.21</i>                              | <i>12</i>                                    | <i>7.26</i>                            | <i>6.39</i>                               | <i>9.33</i>          |
| 10        | <i>Risinger</i>     | <i>1.62</i>                    | <i>2.52</i>                    | <i>2.59</i>                               | <i>2.31</i>                                  | <i>2.82</i>                            | <i>4.38</i>                               | <i>9.67</i>          |
| 11        | <i>Moreno-Bueno</i> | <i>0.03</i>                    | <i>0.08</i>                    | <i>0.46</i>                               | <i>4.25</i>                                  | <i>0.22</i>                            | <i>11.23</i>                              | <i>10.83</i>         |
| 12        | <i>Zorn</i>         | <i>0.27</i>                    | <i>0.6</i>                     | <i>1.24</i>                               | <i>1.37</i>                                  | <i>0.45</i>                            | <i>3.37</i>                               | <i>11.17</i>         |

**Supplementary Table 2. Details for 2,053 genes differentially expressed between EEC and NEEC, identified by microarray meta-analysis.**  
 EEC - endometrioid endometrial cancer, NEEC - non-endometrioid endometrial cancer, SMD - Standardised Mean Difference, FDR - False Discovery Rate, Var - Variance

| Gene     | 145 gene list | 1253 gene list | Associated with EEC-specific survival? | Up/Down Regulated in NEEC | average standardised fold change | Microarray Meta FDR | RNAseq FDR | Individual microarray study results |      |          |             |      |          |              |      |          |          |      |          |          |      |          |              |      |          |              |      |          |             |        |          |
|----------|---------------|----------------|----------------------------------------|---------------------------|----------------------------------|---------------------|------------|-------------------------------------|------|----------|-------------|------|----------|--------------|------|----------|----------|------|----------|----------|------|----------|--------------|------|----------|--------------|------|----------|-------------|--------|----------|
|          |               |                |                                        |                           |                                  |                     |            | TCGA                                |      |          | E-MTAB-2532 |      |          | E-GEOD-56026 |      |          | GSE32507 |      |          | GSE24537 |      |          | E-GEOD-23518 |      |          | E-GEOD-17025 |      |          | E-GEOD-2109 |        |          |
|          |               |                |                                        |                           |                                  |                     |            | SMD                                 | Var  | P-value  | SMD         | Var  | P-value  | SMD          | Var  | P-value  | SMD      | Var  | P-value  | SMD      | Var  | P-value  | SMD          | Var  | P-value  | SMD          | Var  | P-value  | SMD         | Var    | P-value  |
| L1CAM    | Yes           | Yes            | Yes                                    | Up                        | 2.65                             | 1.83E-19            | 1.5E-19    | 2.07                                | 0.14 | 9.09E-07 | 1.29        | 0.04 | 5.91E-06 | 1.84         | 0.13 | 1.00E-20 | 0.36     | 0.11 | 1.28E-01 | 1.10     | 0.15 | 5.82E-03 | 0.92         | 0.22 | 2.47E-02 | 2.48         | 0.13 | 1.00E-20 | 1.18        | 0.04   | 1.00E-20 |
| GPR19    | Yes           | Yes            | No                                     | Up                        | 2.61                             | 1.83E-19            | 1.5E-19    | 1.88                                | 0.13 | 1.75E-05 | 1.59        | 0.04 | 1.00E-20 | 1.76         | 0.13 | 5.66E-05 | 1.49     | 0.14 | 2.86E-05 | 0.61     | 0.14 | 3.27E-01 | 1.04         | 0.23 | 1.11E-01 | 1.50         | 0.11 | 1.16E-03 | 1.21        | 0.04   | 1.00E-20 |
| RYR1     | Yes           | Yes            | No                                     | Up                        | 2.59                             | 1.83E-19            | 1.5E-19    | 1.47                                | 0.12 | 1.29E-04 | 1.60        | 0.04 | 1.00E-20 | 1.33         | 0.12 | 5.27E-04 | 1.29     | 0.14 | 2.45E-05 | 1.24     | 0.16 | 4.82E-03 | 1.82         | 0.28 | 5.97E-04 | 0.85         | 0.10 | 2.54E-02 | 1.38        | 0.04   | 1.00E-20 |
| FAM24B   | Yes           | Yes            | No                                     | Up                        | 2.55                             | 1.83E-19            | 1.5E-19    | 1.88                                | 0.13 | 4.54E-07 | 1.20        | 0.04 | 4.54E-07 | 1.53         | 0.12 | 2.52E-04 | 0.88     | 0.12 | 2.36E-03 | 1.32     | 0.16 | 4.06E-02 | 1.93         | 0.29 | 2.36E-02 | 1.41         | 0.11 | 2.86E-04 | 0.68        | 0.03   | 2.39E-04 |
| USP11    | Yes           | Yes            | No                                     | Up                        | 2.52                             | 1.83E-19            | 1.5E-19    | 0.89                                | 0.11 | 5.43E-03 | 1.18        | 0.04 | 3.18E-06 | 1.07         | 0.11 | 4.38E-03 | 0.94     | 0.12 | 1.54E-02 | 1.52     | 0.17 | 6.90E-04 | 2.49         | 0.36 | 6.57E-05 | 1.30         | 0.11 | 2.64E-04 | 1.30        | 0.04   | 8.63E-06 |
| PLAG1    | Yes           | Yes            | No                                     | Up                        | 2.52                             | 1.83E-19            | 1.5E-19    | 2.28                                | 0.15 | 1.00E-20 | 1.55        | 0.04 | 1.00E-20 | 1.89         | 0.13 | 1.00E-20 | 0.63     | 0.12 | 1.64E-02 | 0.98     | 0.15 | 1.15E-01 | 1.07         | 0.23 | 6.22E-02 | 1.07         | 0.10 | 1.52E-04 | 1.21        | 0.04   | 6.82E-07 |
| UCHL1    | Yes           | Yes            | Yes                                    | Up                        | 2.48                             | 1.83E-19            | 1.5E-19    | 1.46                                | 0.12 | 6.82E-07 | 1.76        | 0.05 | 1.00E-20 | 1.54         | 0.12 | 1.36E-06 | 0.69     | 0.12 | 5.63E-03 | 0.98     | 0.15 | 1.64E-03 | 1.63         | 0.27 | 1.05E-04 | 0.91         | 0.10 | 8.41E-04 | 1.53        | 0.04   | 1.00E-20 |
| EYA4     | Yes           | Yes            | Yes                                    | Up                        | 2.45                             | 1.83E-19            | 1.5E-19    | 1.31                                | 0.12 | 5.47E-05 | 1.68        | 0.04 | 1.00E-20 | 1.33         | 0.12 | 2.32E-05 | 1.07     | 0.13 | 1.22E-04 | 0.94     | 0.15 | 9.38E-02 | 1.17         | 0.23 | 1.34E-02 | 1.46         | 0.11 | 2.04E-06 | 1.41        | 0.04   | 1.00E-20 |
| MX2      | Yes           | Yes            | No                                     | Up                        | 2.44                             | 1.83E-19            | 1.5E-19    | 2.06                                | 0.14 | 4.54E-07 | 1.11        | 0.04 | 4.54E-07 | 1.12         | 0.11 | 3.08E-04 | 0.27     | 0.11 | 3.01E-01 | 1.98     | 0.20 | 1.48E-05 | 1.38         | 0.25 | 1.78E-03 | 1.18         | 0.10 | 1.40E-04 | 1.19        | 0.04   | 1.14E-06 |
| HIF3A    | Yes           | Yes            | No                                     | Up                        | 2.40                             | 1.83E-19            | 1.5E-19    | 1.81                                | 0.13 | 2.61E-05 | 2.17        | 0.05 | 1.00E-20 | 0.91         | 0.11 | 3.66E-03 | 1.47     | 0.14 | 1.36E-06 | 0.37     | 0.14 | 6.12E-01 | 1.05         | 0.23 | 2.17E-01 | 1.33         | 0.11 | 2.39E-03 | 1.03        | 0.04   | 1.00E-20 |
| DLL3     | Yes           | Yes            | No                                     | Up                        | 2.40                             | 1.83E-19            | 1.5E-19    | 0.89                                | 0.11 | 5.60E-03 | 1.74        | 0.05 | 1.00E-20 | 1.07         | 0.11 | 6.55E-03 | 2.07     | 0.17 | 1.00E-20 | 1.18     | 0.16 | 5.03E-03 | 1.97         | 0.30 | 4.35E-04 | 0.32         | 0.10 | 5.16E-01 | 0.89        | 0.03   | 3.18E-06 |
| KIRREL   | Yes           | Yes            | No                                     | Up                        | 2.39                             | 1.83E-19            | 1.5E-19    | 1.27                                | 0.12 | 1.13E-03 | 1.29        | 0.04 | 4.54E-07 | 1.11         | 0.11 | 6.22E-04 | 0.74     | 0.12 | 1.31E-02 | 1.86     | 0.19 | 1.79E-01 | 2.03         | 0.30 | 1.50E-01 | 1.48         | 0.11 | 2.66E-05 | 0.27        | 0.03   | 8.11E-02 |
| WNK3     | Yes           | Yes            | No                                     | Up                        | 2.39                             | 1.83E-19            | 1.5E-19    | 1.08                                | 0.11 | 8.04E-04 | 1.65        | 0.04 | 1.00E-20 | 1.13         | 0.11 | 2.17E-04 | 1.36     | 0.14 | 2.39E-05 | 1.39     | 0.17 | 2.78E-01 | 1.43         | 0.25 | 2.99E-01 | 1.14         | 0.10 | 3.15E-04 | 0.87        | 0.03   | 1.14E-06 |
| ZNF334   | Yes           | Yes            | No                                     | Up                        | 2.38                             | 1.83E-19            | 1.5E-19    | 2.24                                | 0.15 | 1.00E-20 | 1.68        | 0.04 | 2.02E-05 | 1.86         | 0.13 | 3.88E-05 | 0.94     | 0.12 | 6.79E-04 | 1.03     | 0.15 | 9.46E-02 | 1.06         | 0.23 | 2.77E-02 | 0.90         | 0.10 | 5.46E-03 | 1.07        | 0.04   | 1.00E-20 |
| CDC25B   | Yes           | Yes            | Yes                                    | Up                        | 2.36                             | 1.83E-19            | 1.5E-19    | 1.93                                | 0.14 | 2.50E-06 | 0.93        | 0.04 | 3.04E-05 | 1.33         | 0.12 | 3.82E-04 | 1.10     | 0.13 | 3.96E-03 | 1.71     | 0.18 | 7.50E-06 | 1.20         | 0.24 | 1.55E-03 | 0.61         | 0.10 | 3.72E-02 | 1.08        | 0.04   | 2.86E-05 |
| MRGBP    | Yes           | Yes            | No                                     | Up                        | 2.35                             | 1.83E-19            | 0.00023    | 1.44                                | 0.12 | 1.02E-03 | 1.22        | 0.04 | 3.09E-05 | 1.38         | 0.12 | 5.16E-04 | 0.86     | 0.12 | 3.45E-02 | 1.46     | 0.17 | 9.75E-05 | 1.58         | 0.26 | 2.15E-04 | 0.85         | 0.10 | 2.21E-02 | 1.09        | 0.04   | 5.60E-04 |
| FBLN2    | Yes           | Yes            | No                                     | Up                        | 2.35                             | 1.83E-19            | 5.5E-05    | 2.14                                | 0.14 | 1.00E-20 | 0.87        | 0.04 | 5.91E-06 | 1.02         | 0.11 | 2.12E-03 | 1.22     | 0.13 | 2.22E-04 | 1.47     | 0.17 | 9.04E-05 | 1.08         | 0.23 | 3.48E-03 | 1.22         | 0.10 | 2.03E-04 | 0.84        | 0.03   | 9.09E-07 |
| IGFBP2   | Yes           | Yes            | No                                     | Up                        | 2.34                             | 1.83E-19            | 1.5E-19    | 2.11                                | 0.14 | 1.00E-20 | 1.38        | 0.04 | 1.00E-20 | 1.29         | 0.12 | 7.50E-06 | 0.35     | 0.11 | 1.49E-01 | 0.83     | 0.15 | 7.02E-03 | 1.07         | 0.23 | 3.09E-03 | 1.56         | 0.11 | 4.54E-07 | 1.23        | 0.04   | 1.00E-20 |
| FAM110B  | Yes           | Yes            | Yes                                    | Up                        | 2.33                             | 1.83E-19            | 1.5E-19    | 0.84                                | 0.11 | 2.36E-03 | 1.10        | 0.04 | 6.82E-07 | 1.61         | 0.12 | 5.68E-06 | 1.35     | 0.14 | 2.11E-05 | 1.07     | 0.15 | 1.52E-02 | 1.40         | 0.25 | 7.34E-03 | 1.33         | 0.11 | 6.16E-05 | 1.07        | 0.04   | 1.00E-20 |
| CDKN2A   | Yes           | Yes            | Yes                                    | Up                        | 2.32                             | 1.83E-19            | 1.5E-19    | 1.97                                | 0.14 | 1.00E-20 | 1.40        | 0.04 | 1.00E-20 | 1.72         | 0.13 | 1.00E-20 | 0.72     | 0.12 | 6.95E-03 | 1.01     | 0.15 | 5.32E-03 | 0.63         | 0.21 | 8.13E-02 | 1.09         | 0.10 | 1.14E-04 | 1.14        | 0.04   | 1.00E-20 |
| COL8A2   | Yes           | Yes            | No                                     | Up                        | 2.31                             | 1.83E-19            | 1.5E-19    | 1.23                                | 0.12 | 4.34E-05 | 1.08        | 0.04 | 4.54E-07 | 1.62         | 0.12 | 6.82E-06 | 1.43     | 0.14 | 2.48E-05 | 1.26     | 0.16 | 9.99E-04 | 1.24         | 0.24 | 3.14E-03 | 0.73         | 0.10 | 1.78E-02 | 1.07        | 0.04   | 1.00E-20 |
| TMEM136  | Yes           | Yes            | No                                     | Up                        | 2.30                             | 1.83E-19            | 3.1E-05    | 1.35                                | 0.12 | 1.74E-04 | 1.38        | 0.04 | 9.09E-07 | 1.23         | 0.11 | 1.59E-03 | 1.55     | 0.14 | 1.15E-03 | 1.39     | 0.17 | 4.43E-03 | 1.43         | 0.25 | 7.32E-03 | 0.80         | 0.10 | 2.23E-02 | 0.52        | 0.03   | 1.71E-02 |
| PKIA     | Yes           | Yes            | No                                     | Up                        | 2.30                             | 1.83E-19            | 1.5E-19    | 1.04                                | 0.11 | 2.55E-04 | 0.94        | 0.04 | 3.18E-06 | 1.29         | 0.12 | 3.95E-05 | 1.36     | 0.14 | 7.63E-05 | 1.34     | 0.20 | 2.95E-03 | 1.34         | 0.25 | 4.63E-03 | 0.85         | 0.10 | 3.66E-03 | 1.56        | 0.04   | 1.00E-20 |
| IL11RA   | Yes           | Yes            | No                                     | Up                        | 2.27                             | 1.83E-19            | 0.00024    | 1.45                                | 0.12 | 3.23E-05 | 1.05        | 0.04 | 3.18E-06 | 1.03         | 0.11 | 1.52E-03 | 1.71     | 0.15 | 2.36E-05 | 1.23     | 0.16 | 2.63E-04 | 1.48         | 0.25 | 2.32E-04 | 0.56         | 0.10 | 7.54E-02 | 0.98        | 0.03   | 1.34E-05 |
| FBXO17   | Yes           | Yes            | No                                     | Up                        | 2.23                             | 1.83E-19            | 1.5E-19    | 1.53                                | 0.12 | 7.04E-06 | 1.15        | 0.04 | 1.36E-06 | 1.20         | 0.11 | 2.44E-04 | 1.18     | 0.13 | 5.72E-05 | 1.24     | 0.16 | 6.00E-03 | 0.75         | 0.21 | 8.03E-02 | 1.42         | 0.11 | 6.91E-05 | 0.80        | 0.03   | 4.09E-06 |
| DNM1     | Yes           | Yes            | No                                     | Up                        | 2.21                             | 1.83E-19            | 6.7E-06    | 0.90                                | 0.11 | 1.71E-03 | 0.80        | 0.04 | 2.26E-04 | 1.12         | 0.11 | 1.32E-03 | 1.11     | 0.13 | 1.19E-03 | 1.29     | 0.16 | 1.64E-01 | 2.47         | 0.35 | 8.89E-02 | 0.90         | 0.10 | 2.00E-03 | 0.55        | 0.03   | 2.51E-03 |
| EPHB1    | Yes           | Yes            | No                                     | Up                        | 2.20                             | 1.83E-19            | 1.5E-19    | 1.39                                | 0.12 | 2.61E-05 | 0.29        | 0.04 | 2.24E-01 | 1.22         | 0.11 | 1.85E-04 | 1.49     | 0.14 | 1.98E-05 | 1.21     | 0.16 | 3.71E-02 | 1.90         | 0.29 | 5.28E-02 | 0.96         | 0.10 | 3.15E-03 | 0.66        | 0.03   | 2.93E-04 |
| ZNF311   | Yes           | Yes            | No                                     | Up                        | 2.20                             | 1.83E-19            | 1.5E-19    | 1.33                                | 0.12 | 1.38E-04 | 1.28        | 0.04 | 1.40E-04 | 1.37         | 0.12 | 2.47E-04 | 0.66     | 0.12 | 1.39E-02 | 0.30     | 0.14 | 6.28E-01 | 0.61         | 0.26 | 7.22E-02 | 1.74         | 0.11 | 1.70E-05 | 0.81        | 0.03   | 3.68E-05 |
| HOXA4    | Yes           | Yes            | No                                     | Up                        | 2.18                             | 1.83E-19            | 1.5E-19    | 2.08                                | 0.14 | 1.00E-20 | 1.21        | 0.04 | 1.00E-20 | 1.33         | 0.12 | 2.68E-04 | 0.56     | 0.12 | 2.80E-02 | 0.94     | 0.15 | 4.37E-02 | 1.55         | 0.21 | 1.92E-01 | 1.69         | 0.11 | 3.32E-04 | 0.64        | 0.03   | 2.79E-04 |
| DDX25    | Yes           | Yes            | No                                     | Up                        | 2.17                             | 1.83E-19            | 1.5E-19    | 0.63                                | 0.11 | 3.15E-02 | 0.96        | 0.04 | 2.36E-04 | 1.97         | 0.13 | 3.18E-06 | 1.20     | 0.13 | 1.41E-04 | 1.24     | 0.16 | 2.99E-01 | 1.06         | 0.23 | 1.79E-01 | 1.22         | 0.10 | 1.52E-02 | 0.69        | 0.03   | 2.03E-04 |
| SYT13    | Yes           | Yes            | No                                     | Up                        | 2.17                             | 1.83E-19            | 1.5E-19    | 1.44                                | 0.12 | 4.54E-07 | 1.21        | 0.04 | 1.00E-20 | 1.12         | 0.11 | 2.20E-04 | 0.90     | 0.12 | 9.80E-04 | 1.00     | 0.15 | 1.42E-02 | 1.48         | 0.26 | 3.26E-03 | 0.80         | 0.10 | 2.84E-03 | 1.01        | 0.04   | 1.00E-20 |
| SLC22A17 | Yes           | Yes            | No                                     | Up                        | 2.17                             | 1.83E-19            | 2.8E-05    | 1.06                                | 0.11 | 1.86E-03 | 0.95        | 0.04 | 3.68E-05 | 1.23         | 0.11 | 1.49E-03 | 0.50     | 0.12 | 1.62E-01 | 1.57     | 0.17 | 6.16E-05 | 1.70         | 0.27 | 1.36E-04 | 1.02         | 0.10 | 1.28E-02 | 0.93        | 0.03   | 4.54E-07 |
| TPX2     | Yes           | Yes            | Yes                                    | Up                        | 2.17                             | 1.83E-19            | 1.5E-19    | 1.72                                | 0.13 | 3.63E-06 | 1.03        | 0.04 | 1.36E-06 | 0.79         | 0.11 | 3.83E-03 | 1.21     | 0.13 | 6.30E-04 | 1.10     | 0.15 | 3.68E-03 | 1.20         | 0.24 | 4.47E-03 | 0.86         | 0.10 | 2.29E-03 | 1.03        | 0.04   | 1.36E-06 |
| TUBB6    | Yes           | Yes            | No                                     | Up                        | 2.17                             | 1.83E-19            | 4E-05      | 1.22                                | 0.12 | 7.98E-04 | 0.89        | 0.04 | 1.34E-05 | 0.78         | 0.11 | 5.85E-03 | 1.21     | 0.13 | 5.13E-04 | 1.35     | 0.16 | 3.56E-04 | 1.27         | 0.24 | 3.14E-03 | 1.33         | 0.11 | 7.72E-05 | 0.88        | 0.03   | 2.16E-05 |
| KIF3C    | Yes           | Yes            | Yes                                    | Up                        | 2.17                             | 1.83E-19            | 1.3E-05    | 0.64                                | 0.11 | 3.66E-02 | 1.22        | 0.04 | 1.36E-06 | 1.04         | 0.11 | 6.00E-03 | 1.01     | 0.13 | 6.96E-03 | 1.18     | 0.16 | 1.65E-01 | 2.06         | 0.31 | 2.86E-02 | 0.85         | 0.10 | 1.79E-02 | 0.92        | 0.03   | 3.01E-04 |
| SCHIP1   | Yes           | Yes            | No                                     | Up                        | 2.16                             | 1.83E-19            | 1.5E-19    | 1.90                                | 0.13 | 4.54E-07 | 1.04        | 0.04 | 2.27E-06 | 1.31         | 0.12 | 4.77E-05 | 1.33     | 0.14 | 1.02E-04 | 0.46     | 0.14 | 1.29E-01 | 0.17         | 0.20 | 0.64E-01 | 1.60         | 0.11 | 2.50E-06 | 1.07        | 0.04   | 1.36E-06 |
| PNMA3    | Yes           | Yes            | No                                     | Up                        | 2.16                             | 1.83E-19            | 1.5E-19    | 1.31                                | 0.12 | 1.18E-05 | 1.12        | 0.04 | 1.00E-20 | 1.56         | 0.12 | 3.43E-04 | 0.42     | 0.12 | 8.96E-02 | 0.92     | 0.15 | 1.49E-02 | 1.81         | 0.28 | 5.82E-04 | 1.31         | 0.11 | 4.01E-04 | 1.42        | 0.03</ |          |

Supplementary Table 2. Details for 2,053 genes differentially expressed between EEC and NEEC, identified by microarray meta-analysis.  
 EEC - endometrioid endometrial cancer, NEEC - non-endometrioid endometrial cancer, SMD - Standardised Mean Difference, FDR - False Discovery Rate, Var - Variance

| Gene     | 145 gene list | 1253 gene list | Associated with EEC-specific survival? | Up/Down Regulated in NEEC | average standardised fold change | Microarray Meta FDR | RNAseq FDR | Individual microarray study results |          |         |             |          |         |              |          |         |          |          |         |      |          |         |      |          |              |      |          |              |      |          |             |  |  |
|----------|---------------|----------------|----------------------------------------|---------------------------|----------------------------------|---------------------|------------|-------------------------------------|----------|---------|-------------|----------|---------|--------------|----------|---------|----------|----------|---------|------|----------|---------|------|----------|--------------|------|----------|--------------|------|----------|-------------|--|--|
|          |               |                |                                        |                           |                                  |                     |            | TCGA                                |          |         | E-MTAB-2532 |          |         | E-GEOD-56026 |          |         | GSE32507 |          |         |      | GSE24537 |         |      |          | E-GEOD-23518 |      |          | E-GEOD-17025 |      |          | E-GEOD-2109 |  |  |
|          |               |                |                                        |                           |                                  |                     |            | SMD                                 | Var      | P-value | SMD         | Var      | P-value | SMD          | Var      | P-value | SMD      | Var      | P-value | SMD  | Var      | P-value | SMD  | Var      | P-value      | SMD  | Var      | P-value      | SMD  | Var      | P-value     |  |  |
| TMC4     | Yes           | No             | Down                                   | 0.49                      | 1.83E-19                         | validated           | -0.32      | 0.10                                | 2.40E-01 | -1.03   | 0.04        | 2.50E-06 | -0.69   | 0.11         | 1.40E-02 | -1.76   | 0.15     | 7.72E-06 | -1.48   | 0.17 | 7.08E-04 | -1.09   | 0.23 | 2.72E-02 | -0.63        | 0.10 | 4.08E-02 | -1.24        | 0.04 | 1.00E-20 |             |  |  |
| RSPH1    | Yes           | Yes            | Down                                   | 0.49                      | 1.83E-19                         | 0.00012             | -0.83      | 0.11                                | 1.94E-03 | -1.08   | 0.04        | 1.00E-20 | -0.65   | 0.11         | 9.29E-03 | -1.59   | 0.15     | 8.41E-06 | -1.09   | 0.15 | 1.07E-03 | -0.91   | 0.22 | 1.72E-02 | -1.25        | 0.10 | 1.91E-05 | -0.84        | 0.03 | 2.27E-07 |             |  |  |
| MP2L2    | Yes           | Yes            | Down                                   | 0.49                      | 1.83E-19                         | 0.00043             | -0.81      | 0.11                                | 9.11E-03 | -0.82   | 0.04        | 2.75E-05 | -0.83   | 0.11         | 5.29E-03 | -0.96   | 0.13     | 3.82E-03 | -1.53   | 0.17 | 1.77E-05 | -1.60   | 0.26 | 1.21E-04 | -0.70        | 0.10 | 7.98E-03 | -1.00        | 0.03 | 1.00E-20 |             |  |  |
| GCNT3    | Yes           | Yes            | Down                                   | 0.49                      | 1.83E-19                         | 9.7E-05             | -0.84      | 0.11                                | 9.92E-04 | -1.44   | 0.04        | 1.00E-20 | -1.37   | 0.12         | 2.00E-05 | -2.05   | 0.17     | 1.00E-20 | -0.72   | 0.14 | 1.16E-02 | -0.39   | 0.20 | 1.73E-01 | -0.67        | 0.10 | 1.01E-02 | -0.78        | 0.03 | 6.82E-06 |             |  |  |
| RANGRF   | Yes           | Yes            | Down                                   | 0.49                      | 1.83E-19                         | 1.5E-19             | -1.88      | 0.13                                | 6.82E-07 | -1.11   | 0.04        | 2.73E-06 | -0.98   | 0.11         | 2.04E-03 | -0.75   | 0.12     | 4.64E-02 | -0.58   | 0.14 | 5.74E-01 | -0.87   | 0.22 | 5.37E-01 | -1.04        | 0.10 | 9.48E-04 | -1.05        | 0.04 | 5.68E-06 |             |  |  |
| ACSL5    | Yes           | Yes            | Down                                   | 0.49                      | 1.83E-19                         | 1.5E-19             | -1.08      | 0.11                                | 4.82E-05 | -0.96   | 0.04        | 9.09E-07 | -1.10   | 0.11         | 9.25E-05 | -1.28   | 0.13     | 6.11E-05 | -0.87   | 0.15 | 2.16E-03 | -0.90   | 0.22 | 6.76E-03 | -1.22        | 0.10 | 1.16E-05 | -0.90        | 0.03 | 4.54E-07 |             |  |  |
| GLYATL2  | Yes           | Yes            | Down                                   | 0.49                      | 1.83E-19                         | 1.5E-19             | -1.70      | 0.13                                | 4.54E-07 | -1.28   | 0.04        | 1.00E-20 | -1.00   | 0.11         | 2.58E-04 | -0.37   | 0.11     | 1.16E-01 | -0.95   | 0.15 | 3.59E-03 | -1.37   | 0.25 | 1.78E-03 | -0.92        | 0.10 | 1.68E-03 | -0.73        | 0.03 | 8.86E-06 |             |  |  |
| LRBA     | Yes           | Yes            | Down                                   | 0.49                      | 1.83E-19                         | 0.00214             | -1.14      | 0.11                                | 6.93E-03 | -0.81   | 0.04        | 4.05E-04 | -1.18   | 0.11         | 2.10E-03 | -1.31   | 0.14     | 2.05E-03 | -0.78   | 0.15 | 1.12E-02 | -1.66   | 0.27 | 2.35E-04 | -0.85        | 0.10 | 6.80E-03 | -0.60        | 0.03 | 1.82E-02 |             |  |  |
| ADAM28   | Yes           | Yes            | Down                                   | 0.49                      | 1.83E-19                         | 1.5E-19             | -1.03      | 0.11                                | 8.49E-04 | -1.19   | 0.04        | 1.00E-20 | -0.69   | 0.11         | 7.09E-03 | -1.00   | 0.13     | 8.52E-04 | -1.26   | 0.16 | 3.50E-02 | -1.12   | 0.23 | 7.12E-02 | -1.10        | 0.10 | 8.77E-05 | -0.96        | 0.03 | 1.00E-20 |             |  |  |
| TRAF3IP2 | Yes           | Yes            | Down                                   | 0.48                      | 1.83E-19                         | 1.5E-19             | -0.87      | 0.11                                | 2.96E-03 | -1.12   | 0.04        | 6.82E-07 | -0.94   | 0.11         | 2.13E-03 | -0.70   | 0.12     | 2.89E-02 | -1.36   | 0.16 | 8.66E-05 | -1.31   | 0.24 | 6.59E-04 | -1.08        | 0.10 | 6.96E-04 | -0.97        | 0.03 | 1.61E-05 |             |  |  |
| SLC25A35 | Yes           | Yes            | Down                                   | 0.48                      | 1.83E-19                         | 1.5E-19             | -1.51      | 0.12                                | 3.63E-06 | -0.96   | 0.04        | 4.54E-07 | -1.10   | 0.11         | 5.23E-04 | -1.67   | 0.15     | 1.59E-06 | -0.37   | 0.14 | 1.10E-01 | -0.56   | 0.21 | 9.31E-02 | -0.90        | 0.10 | 1.06E-03 | -1.29        | 0.04 | 1.00E-20 |             |  |  |
| NPOC1    | Yes           | Yes            | Down                                   | 0.48                      | 1.83E-19                         | 1.5E-19             | -1.72      | 0.13                                | 6.82E-07 | -1.44   | 0.04        | 1.00E-20 | -0.93   | 0.11         | 2.16E-03 | -1.46   | 0.14     | 3.01E-04 | -0.21   | 0.14 | 3.51E-01 | -0.22   | 0.20 | 3.69E-01 | -1.17        | 0.10 | 5.95E-04 | -1.23        | 0.04 | 4.54E-07 |             |  |  |
| SYTL1    | Yes           | Yes            | Down                                   | 0.48                      | 1.83E-19                         | 1.5E-19             | -1.09      | 0.11                                | 7.68E-04 | -0.92   | 0.04        | 5.45E-06 | -0.79   | 0.11         | 7.74E-03 | -1.82   | 0.16     | 7.50E-06 | -1.08   | 0.15 | 1.16E-02 | -0.92   | 0.22 | 3.80E-02 | -0.62        | 0.10 | 3.08E-02 | -1.14        | 0.04 | 1.00E-20 |             |  |  |
| EHF      | Yes           | No             | Down                                   | 0.48                      | 1.83E-19                         | 0.04128             | -0.79      | 0.11                                | 1.43E-03 | -1.01   | 0.04        | 6.82E-07 | -0.58   | 0.11         | 2.54E-02 | -1.12   | 0.13     | 1.28E-04 | -1.19   | 0.16 | 6.95E-04 | -0.82   | 0.22 | 3.47E-02 | -1.79        | 0.11 | 2.27E-07 | -1.10        | 0.04 | 1.00E-20 |             |  |  |
| LNX1     | No            | Yes            | Down                                   | 0.50                      | 1.83E-19                         | 6.7E-06             | -1.04      | 0.11                                | 3.37E-03 | -0.75   | 0.04        | 5.13E-04 | -1.18   | 0.11         | 2.54E-04 | -0.84   | 0.12     | 1.40E-02 | -1.01   | 0.15 | 2.47E-01 | -1.06   | 0.23 | 2.36E-01 | -0.91        | 0.10 | 3.01E-03 | -1.22        | 0.04 | 1.00E-20 |             |  |  |
| SLC40A1  | No            | Yes            | Down                                   | 0.50                      | 1.83E-19                         | 1.5E-19             | -1.17      | 0.11                                | 6.00E-05 | -1.23   | 0.04        | 1.00E-20 | -1.36   | 0.12         | 3.82E-05 | -0.37   | 0.11     | 1.84E-01 | -1.14   | 0.16 | 3.10E-04 | -0.70   | 0.21 | 2.49E-02 | -1.32        | 0.11 | 8.63E-06 | -0.68        | 0.03 | 5.43E-04 |             |  |  |
| OVOL2    | No            | No             | Down                                   | 0.50                      | 1.83E-19                         | validated           | -0.72      | 0.11                                | 1.34E-02 | -0.74   | 0.04        | 6.20E-05 | -0.71   | 0.11         | 1.91E-02 | -0.92   | 0.12     | 1.13E-03 | -1.93   | 0.19 | 7.72E-06 | -1.55   | 0.26 | 8.91E-04 | -0.75        | 0.10 | 1.73E-02 | -0.64        | 0.03 | 3.91E-03 |             |  |  |
| PRR15    | No            | Yes            | Down                                   | 0.50                      | 1.83E-19                         | 1.5E-19             | -1.18      | 0.11                                | 2.35E-04 | -1.12   | 0.04        | 1.00E-20 | -1.05   | 0.11         | 5.92E-06 | -1.68   | 0.15     | 3.36E-06 | -0.54   | 0.14 | 3.65E-05 | -0.48   | 0.21 | 4.13E-01 | -0.98        | 0.10 | 1.10E-03 | -0.93        | 0.03 | 6.82E-07 |             |  |  |
| CRYL1    | No            | Yes            | Down                                   | 0.50                      | 1.83E-19                         | 1.9E-05             | -1.33      | 0.11                                | 2.16E-03 | -1.33   | 0.04        | 1.00E-20 | -1.19   | 0.11         | 6.50E-04 | -0.54   | 0.12     | 9.91E-02 | -0.78   | 0.15 | 2.40E-02 | -1.25   | 0.24 | 4.44E-03 | -0.85        | 0.10 | 4.47E-03 | -1.09        | 0.04 | 3.68E-05 |             |  |  |
| NDUFA1   | No            | Yes            | Down                                   | 0.50                      | 1.83E-19                         | 0.00722             | -0.94      | 0.11                                | 1.77E-02 | -1.26   | 0.04        | 1.07E-05 | -0.78   | 0.11         | 2.65E-02 | -0.31   | 0.11     | 4.41E-01 | -1.34   | 0.16 | 9.50E-03 | -1.45   | 0.25 | 1.66E-02 | -0.97        | 0.10 | 4.56E-03 | -0.88        | 0.03 | 4.20E-03 |             |  |  |
| ARPC3    | No            | No             | Down                                   | 0.50                      | 1.14E-05                         | validated           | -0.48      | 0.10                                | 2.10E-01 | -0.63   | 0.04        | 1.51E-02 | -1.33   | 0.12         | 1.52E-02 | -1.80   | 0.16     | 9.83E-03 | -0.90   | 0.15 | 1.99E-03 | -1.41   | 0.25 | 3.00E-04 | -0.59        | 0.10 | 5.39E-02 | -0.77        | 0.03 | 1.92E-02 |             |  |  |
| FOLH1    | No            | Yes            | Down                                   | 0.50                      | 1.83E-19                         | 1.5E-19             | -0.97      | 0.11                                | 1.03E-03 | -0.88   | 0.04        | 5.00E-06 | -0.77   | 0.11         | 3.37E-03 | -1.20   | 0.13     | 3.91E-04 | -0.92   | 0.15 | 5.61E-02 | -0.93   | 0.22 | 8.22E-02 | -1.37        | 0.11 | 7.27E-06 | -0.87        | 0.03 | 3.41E-06 |             |  |  |
| SSR4     | No            | No             | Down                                   | 0.50                      | 1.83E-19                         | 0.00181             | -0.51      | 0.10                                | 1.24E-01 | -0.50   | 0.04        | 2.18E-02 | -1.25   | 0.12         | 2.33E-03 | -1.32   | 0.14     | 3.68E-03 | -0.60   | 0.14 | 1.86E-02 | -1.15   | 0.23 | 1.43E-03 | -1.67        | 0.11 | 1.02E-05 | -0.90        | 0.03 | 1.43E-03 |             |  |  |
| ARL6IP5  | No            | Yes            | Down                                   | 0.50                      | 1.83E-19                         | 4.6E-06             | -1.40      | 0.12                                | 2.37E-04 | -0.80   | 0.04        | 2.86E-04 | -0.88   | 0.11         | 1.37E-02 | -0.41   | 0.12     | 2.07E-01 | -1.22   | 0.16 | 2.31E-04 | -1.10   | 0.23 | 2.40E-03 | -0.93        | 0.10 | 1.67E-03 | -1.16        | 0.04 | 5.34E-05 |             |  |  |
| SH2D4A   | No            | Yes            | Down                                   | 0.50                      | 1.83E-19                         | 5E-05               | -0.88      | 0.11                                | 4.83E-03 | -0.98   | 0.04        | 1.73E-05 | -1.28   | 0.12         | 1.82E-03 | -0.81   | 0.12     | 1.48E-02 | -1.12   | 0.16 | 1.45E-02 | -1.53   | 0.26 | 5.85E-03 | -0.70        | 0.10 | 6.32E-02 | -0.58        | 0.03 | 1.52E-02 |             |  |  |
| C9ORF116 | No            | Yes            | Down                                   | 0.51                      | 1.83E-19                         | 0.00223             | -0.90      | 0.11                                | 3.07E-03 | -1.01   | 0.04        | 1.36E-06 | -0.91   | 0.11         | 2.64E-03 | -1.63   | 0.15     | 8.93E-05 | -1.20   | 0.16 | 5.48E-04 | -0.89   | 0.22 | 2.26E-02 | -0.59        | 0.10 | 5.41E-02 | -0.74        | 0.03 | 3.18E-06 |             |  |  |
| PPM1H    | No            | Yes            | Down                                   | 0.51                      | 1.83E-19                         | 0.00296             | -1.16      | 0.11                                | 2.34E-04 | -0.71   | 0.04        | 2.14E-04 | -0.65   | 0.11         | 1.66E-02 | -1.15   | 0.13     | 6.93E-04 | -1.05   | 0.15 | 2.34E-03 | -1.53   | 0.26 | 1.16E-03 | -1.34        | 0.11 | 8.62E-05 | -0.27        | 0.03 | 9.53E-02 |             |  |  |
| CYP4X1   | No            | Yes            | Down                                   | 0.51                      | 1.83E-19                         | 1.5E-19             | -1.18      | 0.11                                | 4.18E-05 | -0.91   | 0.04        | 3.41E-06 | -1.02   | 0.11         | 3.16E-04 | -0.40   | 0.12     | 1.15E-01 | -0.64   | 0.14 | 1.63E-02 | -0.68   | 0.21 | 2.99E-02 | -1.85        | 0.11 | 1.00E-20 | -1.18        | 0.04 | 1.00E-20 |             |  |  |
| FUK      | No            | Yes            | Down                                   | 0.51                      | 3.58E-06                         | 0.00371             | -0.86      | 0.11                                | 1.85E-02 | -0.83   | 0.04        | 5.60E-04 | -1.39   | 0.12         | 2.82E-03 | -1.94   | 0.16     | 7.30E-04 | -0.62   | 0.14 | 8.95E-02 | -1.05   | 0.23 | 3.34E-02 | -0.18        | 0.10 | 6.06E-01 | -0.99        | 0.03 | 9.67E-04 |             |  |  |
| ERP29    | No            | Yes            | Down                                   | 0.51                      | 1.83E-19                         | 0.02039             | -0.07      | 0.10                                | 8.54E-01 | -0.71   | 0.04        | 4.94E-03 | -0.46   | 0.10         | 1.58E-01 | -1.03   | 0.13     | 3.97E-02 | -1.11   | 0.16 | 4.06E-04 | -2.40   | 0.34 | 4.54E-07 | -1.31        | 0.11 | 1.36E-04 | -1.73        | 0.03 | 1.49E-02 |             |  |  |
| OMA1     | No            | Yes            | Down                                   | 0.51                      | 1.83E-19                         | 0.02831             | -0.86      | 0.11                                | 1.66E-02 | -1.19   | 0.04        | 2.95E-05 | -1.01   | 0.11         | 8.26E-03 | -0.82   | 0.12     | 9.01E-02 | -0.69   | 0.14 | 6.06E-02 | -1.50   | 0.26 | 3.96E-03 | -0.68        | 0.10 | 5.12E-02 | -1.07        | 0.04 | 3.68E-04 |             |  |  |
| OSTF1    | No            | Yes            | Down                                   | 0.51                      | 1.83E-19                         | 1.5E-19             | -1.22      | 0.12                                | 1.03E-03 | -1.01   | 0.04        | 2.43E-05 | -1.05   | 0.11         | 6.08E-03 | -0.75   | 0.12     | 3.20E-02 | -0.67   | 0.14 | 2.17E-02 | -1.06   | 0.23 | 6.96E-03 | -1.27        | 0.10 | 3.65E-04 | -0.78        | 0.03 | 2.28E-03 |             |  |  |
| RAB25    | No            | No             | Down                                   | 0.51                      | 1.83E-19                         | validated           | -0.43      | 0.10                                | 1.10E-01 | -0.91   | 0.04        | 4.54E-06 | -0.60   | 0.11         | 2.11E-02 | -1.17   | 0.13     | 2.64E-04 | -1.61   | 0.18 | 1.48E-05 | -1.15   | 0.23 | 1.90E-03 | -0.97        | 0.10 | 8.14E-04 | -0.99        | 0.03 | 1.00E-20 |             |  |  |
| TTCL2    | No            | Yes            | Down                                   | 0.51                      | 1.83E-19                         | 0.00178             | -0.90      | 0.11                                | 4.99E-03 | -0.97   | 0.04        | 2.32E-05 | -0.49   | 0.10         | 1.04E-01 | -0.84   | 0.12     | 3.08E-02 | -1.30   | 0.16 | 7.74E-03 | -1.82   | 0.28 | 8.79E-03 | -0.73        | 0.10 | 1.96E-02 | -1.75        | 0.03 | 7.73E-04 |             |  |  |
| SWAP70   | No            | Yes            | Down                                   | 0.51                      | 1.83E-19                         | 4.2E-05             | -1.29      | 0.12                                | 8.04E-04 | -0.70   | 0.04        | 7.29E-04 | -0.35   | 0.10         | 2.39E-01 | -1.57   | 0.15     | 2.66E-04 | -0.68   | 0.14 | 3.43E-02 | -1.23   | 0.24 | 7.76E-03 | -0.91        | 0.10 | 1.50E-03 | -1.05        | 0.04 | 4.52E-04 |             |  |  |
| SEC11C   | No            | Yes            | Down                                   | 0.51                      | 1.83E-19                         | 0.01717             | -1.01      | 0.11                                | 3.00E-03 | -0.93   | 0.04        | 7.68E-05 | -0.51   | 0.10         | 1.14E-01 | -0.71   | 0.12     | 4.70E-02 | -1.26   | 0.16 | 1.17E-03 | -0.95   | 0.22 | 1.55E-02 | -1.16        | 0.10 | 7.35E-04 | -1.25        | 0.04 | 1.13E-04 |             |  |  |
| TMD6C    | No            | Yes            | Down                                   | 0.51                      | 1.83E-19                         | 1.5E-19             | -0.92      | 0.11                                | 2.54E-04 | -1.13   | 0.04        | 1.00E-20 | -0.78   | 0.11         | 2.33E-03 | -1.37   | 0.14     | 3.20E-05 | -0.88   | 0.15 | 1.28E-02 | -0.93   | 0.22 | 3.17E-02 | -1.02        | 0.10 | 1.64E-04 | -0.74        | 0.03 | 2.73E-06 |             |  |  |
| ARFP1    | No            | Yes            | Down                                   | 0.51                      | 1.83E-19                         | 0.0176              | -1.25      | 0.12                                | 3.23E-03 | -1.27   | 0.04        | 1.23E-05 | -0.64   | 0.11         | 5.18E-02 | -0.45   | 0.12     | 2.12E-01 | -0.99   | 0.15 | 8.68E-03 | -1.69   | 0    |          |              |      |          |              |      |          |             |  |  |

**Supplementary Table 2. Details for 2,053 genes differentially expressed between EEC and NEEC, identified by microarray meta-analysis.**  
 EEC - endometrioid endometrial cancer, NEEC - non-endometrioid endometrial cancer, SMD - Standardised Mean Difference, FDR - False Discovery Rate, Var - Variance

| Gene     | 145 gene list | 1253 gene list | Associated with EEC-specific survival? | Up/Down Regulated in NEEC | average standardised fold change | Microarray Meta FDR | RNAseq FDR | Individual microarray study results |      |          |             |       |          |              |       |          |          |       |          |          |       |          |              |       |          |              |       |          |             |       |          |          |
|----------|---------------|----------------|----------------------------------------|---------------------------|----------------------------------|---------------------|------------|-------------------------------------|------|----------|-------------|-------|----------|--------------|-------|----------|----------|-------|----------|----------|-------|----------|--------------|-------|----------|--------------|-------|----------|-------------|-------|----------|----------|
|          |               |                |                                        |                           |                                  |                     |            | TCGA                                |      |          | E-MTAB-2532 |       |          | E-GEOD-56026 |       |          | GSE32507 |       |          | GSE24537 |       |          | E-GEOD-23518 |       |          | E-GEOD-17025 |       |          | E-GEOD-2109 |       |          |          |
|          |               |                |                                        |                           |                                  |                     |            | SMD                                 | Var  | P-value  | SMD         | Var   | P-value  | SMD          | Var   | P-value  | SMD      | Var   | P-value  | SMD      | Var   | P-value  | SMD          | Var   | P-value  | SMD          | Var   | P-value  | SMD         | Var   | P-value  |          |
| GJB1     | No            | No             | No                                     | Down                      | 0.53                             | 1.83E-19            | validated  | -0.90                               |      | 0.11     | 8.08E-04    | -1.01 | 0.04     | 4.54E-07     | -0.96 | 0.11     | 1.03E-02 | -1.42 | 0.14     | 9.31E-06 | -0.78 | 0.15     | 5.43E-02     | -1.26 | 0.24     | 1.14E-02     | -0.38 | 0.10     | 2.14E-01    | -0.54 | 0.03     | 1.93E-03 |
| RUND1    | No            | No             | No                                     | Down                      | 0.53                             | 3.58E-06            | 0.00782    | -1.41                               | 0.12 | 4.90E-03 | -1.10       | 0.04  | 3.75E-05 | -0.91        | 0.11  | 1.75E-02 | -0.59    | 0.12  | 1.99E-01 | -0.79    | 0.15  | 4.95E-02 | -1.37        | 0.25  | 1.98E-02 | -0.44        | 0.10  | 1.98E-01 | -0.63       | 0.03  | 6.21E-04 |          |
| KIAA0247 | No            | No             | No                                     | Down                      | 0.54                             | 3.58E-06            | validated  | -1.18                               | 0.11 | 4.61E-03 | -0.53       | 0.04  | 2.18E-02 | -0.32        | 0.10  | 2.71E-01 | -0.71    | 0.12  | 9.42E-02 | -0.64    | 0.14  | 6.18E-02 | -1.16        | 0.23  | 1.07E-02 | -1.85        | 0.11  | 6.13E-06 | -0.82       | 0.03  | 3.62E-03 |          |
| NUMB     | No            | No             | No                                     | Down                      | 0.54                             | 3.34E-05            | validated  | -0.74                               | 0.11 | 5.62E-02 | -0.92       | 0.04  | 1.23E-03 | -0.11        | 0.10  | 6.50E-01 | -2.27    | 0.18  | 3.71E-03 | -1.07    | 0.15  | 2.58E-03 | -1.21        | 0.24  | 4.67E-03 | -0.27        | 0.10  | 2.46E-01 | -0.59       | 0.03  | 1.50E-02 |          |
| PLCB1    | No            | Yes            | No                                     | Down                      | 0.54                             | 1.83E-19            | 0.0018     | -1.02                               | 0.11 | 1.36E-03 | -0.62       | 0.04  | 5.45E-04 | -0.66        | 0.11  | 2.05E-02 | -1.11    | 0.13  | 1.26E-03 | -1.47    | 0.17  | 7.74E-04 | -0.79        | 0.22  | 7.21E-02 | -0.86        | 0.10  | 1.93E-03 | -0.61       | 0.03  | 2.99E-03 |          |
| GAS5     | No            | Yes            | No                                     | Down                      | 0.54                             | 1.14E-05            | 0.00058    | -1.26                               | 0.12 | 1.59E-03 | -0.82       | 0.04  | 2.59E-04 | -0.46        | 0.10  | 2.99E-01 | -0.73    | 0.12  | 2.08E-02 | -1.11    | 0.15  | 1.57E-02 | -1.22        | 0.24  | 2.05E-02 | -0.96        | 0.10  | 2.11E-02 | -0.58       | 0.03  | 1.94E-02 |          |
| LRRRC8E  | No            | Yes            | No                                     | Down                      | 0.54                             | 1.83E-19            | 0.00227    | -0.42                               | 0.10 | 1.62E-01 | -0.93       | 0.04  | 1.29E-05 | -0.55        | 0.11  | 7.43E-02 | -1.00    | 0.13  | 2.74E-03 | -1.43    | 0.17  | 2.67E-02 | -1.19        | 0.24  | 8.28E-02 | -0.62        | 0.10  | 5.22E-02 | -0.99       | 0.03  | 1.36E-06 |          |
| FAM107B  | No            | No             | No                                     | Down                      | 0.54                             | 1.83E-19            | 0.03833    | -0.69                               | 0.11 | 2.00E-02 | -0.93       | 0.04  | 5.45E-05 | -0.66        | 0.11  | 4.59E-02 | -1.26    | 0.11  | 4.11E-01 | -1.66    | 0.18  | 4.66E-05 | -1.36        | 0.25  | 1.08E-03 | -0.88        | 0.10  | 4.84E-03 | -0.69       | 0.03  | 6.77E-03 |          |
| SEC16A   | No            | Yes            | No                                     | Down                      | 0.54                             | 1.66E-05            | 0.00122    | -1.08                               | 0.11 | 1.28E-02 | -0.95       | 0.04  | 4.01E-04 | -0.76        | 0.11  | 4.30E-02 | -1.24    | 0.13  | 2.92E-02 | -0.79    | 0.15  | 1.25E-02 | -0.99        | 0.22  | 1.41E-02 | -0.36        | 0.10  | 3.02E-01 | -0.95       | 0.03  | 9.56E-03 |          |
| ANAPC4   | No            | Yes            | Yes                                    | Down                      | 0.54                             | 1.83E-19            | 2E-05      | -0.99                               | 0.11 | 8.13E-04 | -0.74       | 0.04  | 5.88E-05 | -0.48        | 0.10  | 6.39E-02 | -1.51    | 0.14  | 1.60E-04 | -0.67    | 0.14  | 1.17E-02 | -0.87        | 0.22  | 1.24E-02 | -0.94        | 0.10  | 1.17E-03 | -0.90       | 0.03  | 1.70E-05 |          |
| SLC11A   | No            | Yes            | No                                     | Down                      | 0.54                             | 1.83E-19            | 1.5E-19    | -1.80                               | 0.13 | 3.63E-06 | -0.75       | 0.04  | 6.36E-05 | -0.59        | 0.11  | 1.88E-02 | -1.16    | 0.13  | 7.38E-04 | -0.79    | 0.15  | 2.26E-01 | -0.89        | 0.22  | 2.76E-01 | -0.62        | 0.10  | 1.31E-02 | -0.50       | 0.03  | 2.95E-03 |          |
| ZNF562   | No            | No             | No                                     | Down                      | 0.54                             | 8.89E-05            | validated  | -0.52                               | 0.10 | 2.10E-01 | -0.64       | 0.04  | 1.01E-02 | -0.93        | 0.11  | 1.52E-02 | -0.71    | 0.12  | 9.15E-02 | -1.12    | 0.16  | 6.68E-03 | -1.58        | 0.26  | 2.25E-03 | -0.96        | 0.10  | 2.17E-02 | -0.64       | 0.03  | 4.68E-02 |          |
| FUT2     | No            | Yes            | No                                     | Down                      | 0.54                             | 1.83E-19            | 0.00011    | -0.50                               | 0.10 | 8.98E-02 | -0.90       | 0.04  | 1.32E-05 | -1.23        | 0.11  | 1.89E-04 | -0.91    | 0.12  | 1.24E-03 | -1.08    | 0.15  | 1.11E-02 | -1.16        | 0.23  | 3.34E-02 | -0.58        | 0.10  | 7.79E-02 | -0.74       | 0.03  | 9.31E-05 |          |
| CIORF168 | No            | No             | No                                     | Down                      | 0.54                             | 1.83E-19            | validated  | -0.30                               | 0.10 | 2.14E-01 | -0.93       | 0.04  | 3.86E-06 | -0.93        | 0.11  | 7.51E-04 | -1.26    | 0.13  | 6.29E-05 | -0.38    | 0.14  | 3.89E-01 | -1.64        | 0.27  | 3.97E-02 | -1.01        | 0.10  | 1.67E-04 | -0.64       | 0.03  | 2.22E-04 |          |
| CA8      | No            | Yes            | No                                     | Down                      | 0.54                             | 1.83E-19            | 1.5E-19    | -0.45                               | 0.10 | 4.92E-02 | -1.30       | 0.04  | 1.00E-20 | -0.59        | 0.11  | 2.18E-02 | -0.53    | 0.12  | 3.96E-02 | -1.41    | 0.17  | 1.06E-03 | -1.50        | 0.26  | 3.65E-03 | -0.39        | 0.10  | 1.61E-01 | -0.90       | 0.03  | 2.04E-06 |          |
| B4GALT4  | No            | Yes            | No                                     | Down                      | 0.54                             | 3.58E-06            | 0.0056     | -0.71                               | 0.11 | 4.33E-02 | -0.67       | 0.04  | 2.84E-03 | -0.93        | 0.11  | 5.82E-03 | -0.38    | 0.12  | 2.85E-01 | -1.31    | 0.16  | 2.81E-02 | -1.31        | 0.24  | 6.87E-03 | -1.02        | 0.10  | 2.53E-03 | -0.74       | 0.03  | 2.33E-03 |          |
| CNCO     | No            | Yes            | No                                     | Down                      | 0.54                             | 1.83E-19            | 4.1E-05    | -1.26                               | 0.12 | 1.24E-04 | -1.24       | 0.04  | 1.00E-20 | -0.73        | 0.11  | 9.88E-03 | -0.44    | 0.12  | 1.82E-01 | -1.03    | 0.15  | 3.65E-03 | -0.71        | 0.21  | 1.21E-01 | -0.78        | 0.10  | 6.67E-03 | -0.88       | 0.03  | 1.39E-05 |          |
| PDZD8    | No            | Yes            | No                                     | Down                      | 0.54                             | 6.71E-06            | 0.04004    | -1.21                               | 0.11 | 3.62E-04 | -0.53       | 0.04  | 5.68E-03 | -0.88        | 0.11  | 5.10E-03 | -1.47    | 0.14  | 3.19E-04 | -0.32    | 0.14  | 1.98E-01 | -0.85        | 0.22  | 3.99E-02 | -0.93        | 0.10  | 1.00E-03 | -0.87       | 0.03  | 3.26E-04 |          |
| C17ORF28 | No            | No             | No                                     | Down                      | 0.54                             | 1.83E-19            | validated  | -0.56                               | 0.10 | 1.28E-01 | -0.87       | 0.04  | 3.50E-05 | -0.28        | 0.10  | 4.19E-01 | -2.13    | 0.17  | 5.23E-06 | -1.16    | 0.16  | 5.07E-03 | -1.29        | 0.24  | 6.20E-03 | -0.19        | 0.10  | 6.00E-01 | -0.58       | 0.03  | 1.17E-03 |          |
| REEP5    | No            | No             | No                                     | Down                      | 0.54                             | 6.71E-06            | 0.04094    | -1.10                               | 0.11 | 1.03E-02 | -1.13       | 0.04  | 4.91E-01 | -1.59        | 0.12  | 4.86E-04 | -1.48    | 0.14  | 3.89E-03 | -0.51    | 0.14  | 4.37E-02 | -0.94        | 0.22  | 6.86E-03 | -0.06        | 0.10  | 8.37E-01 | -1.22       | 0.04  | 7.09E-05 |          |
| CNKG6    | No            | Yes            | No                                     | Down                      | 0.54                             | 1.83E-19            | 1.5E-19    | -1.36                               | 0.12 | 2.43E-04 | -1.32       | 0.04  | 1.00E-20 | -0.94        | 0.11  | 1.98E-03 | -0.40    | 0.12  | 1.64E-01 | -0.78    | 0.15  | 3.15E-02 | -0.68        | 0.21  | 8.16E-02 | -0.78        | 0.10  | 2.31E-02 | -0.77       | 0.03  | 8.72E-04 |          |
| LRRCA6   | No            | Yes            | No                                     | Down                      | 0.54                             | 1.83E-19            | 1.5E-19    | -1.19                               | 0.11 | 6.88E-05 | -0.89       | 0.04  | 2.04E-06 | -0.76        | 0.11  | 2.80E-03 | -1.13    | 0.13  | 1.00E-03 | -0.83    | 0.15  | 2.03E-02 | -0.74        | 0.21  | 1.68E-01 | -0.86        | 0.10  | 1.53E-03 | -0.62       | 0.03  | 1.39E-04 |          |
| GYLTL1B  | No            | No             | No                                     | Down                      | 0.54                             | 1.83E-19            | 0.0092     | -0.63                               | 0.11 | 2.93E-02 | -0.88       | 0.04  | 1.61E-05 | -0.64        | 0.11  | 3.01E-02 | -2.13    | 0.17  | 2.50E-06 | -1.05    | 0.15  | 2.46E-02 | -0.92        | 0.22  | 4.52E-02 | -0.24        | 0.10  | 3.90E-01 | -0.52       | 0.03  | 1.36E-02 |          |
| SLC11A2  | No            | Yes            | Yes                                    | Down                      | 0.54                             | 1.83E-19            | 1.3E-05    | -0.53                               | 0.10 | 8.93E-02 | -0.78       | 0.04  | 2.54E-04 | -0.86        | 0.11  | 1.01E-02 | -0.75    | 0.12  | 4.63E-02 | -1.10    | 0.15  | 4.99E-04 | -1.30        | 0.24  | 6.78E-04 | -0.92        | 0.10  | 1.25E-02 | -0.93       | 0.03  | 1.87E-04 |          |
| CIORF64  | No            | Yes            | Yes                                    | Down                      | 0.54                             | 1.83E-19            | 1.5E-19    | -1.54                               | 0.12 | 4.54E-07 | -1.19       | 0.04  | 1.00E-20 | -0.78        | 0.11  | 6.20E-03 | -0.89    | 0.12  | 5.31E-04 | -0.73    | 0.14  | 8.47E-03 | -0.76        | 0.21  | 4.87E-02 | -0.49        | 0.10  | 1.04E-01 | -0.63       | 0.03  | 2.42E-04 |          |
| MSX1     | No            | Yes            | Yes                                    | Down                      | 0.55                             | 1.83E-19            | 1.5E-19    | -0.74                               | 0.11 | 1.69E-03 | -0.86       | 0.04  | 1.36E-06 | -0.47        | 0.10  | 3.02E-02 | -0.82    | 0.12  | 3.02E-03 | -0.98    | 0.15  | 8.54E-04 | -1.34        | 0.25  | 3.21E-04 | -0.94        | 0.10  | 2.13E-04 | -0.84       | 0.03  | 1.00E-20 |          |
| BACE2    | No            | Yes            | Yes                                    | Down                      | 0.55                             | 1.83E-19            | 6.4E-05    | -1.33                               | 0.12 | 4.63E-05 | -0.98       | 0.04  | 5.45E-06 | -0.54        | 0.11  | 5.53E-02 | -0.73    | 0.12  | 2.82E-02 | -0.91    | 0.15  | 1.42E-02 | -1.20        | 0.24  | 7.25E-03 | -0.44        | 0.10  | 8.46E-02 | -0.87       | 0.03  | 7.22E-05 |          |
| WDR78    | No            | Yes            | No                                     | Down                      | 0.55                             | 1.83E-19            | 0.00242    | -0.71                               | 0.11 | 7.00E-03 | -0.80       | 0.04  | 2.41E-05 | -0.80        | 0.11  | 3.80E-03 | -1.19    | 0.13  | 7.66E-04 | -1.06    | 0.15  | 9.08E-02 | -0.42        | 0.20  | 6.04E-01 | -1.19        | 0.10  | 5.29E-05 | -0.89       | 0.03  | 2.04E-06 |          |
| SCGB102  | No            | Yes            | No                                     | Down                      | 0.55                             | 1.83E-19            | 2E-05      | -1.04                               | 0.11 | 5.36E-05 | -0.89       | 0.04  | 4.54E-07 | -1.01        | 0.11  | 8.43E-05 | -0.93    | 0.12  | 4.14E-04 | -0.73    | 0.14  | 6.64E-03 | -0.62        | 0.21  | 4.85E-02 | -0.78        | 0.10  | 1.07E-03 | -0.94       | 0.03  | 1.00E-20 |          |
| SDF2L1   | No            | Yes            | No                                     | Down                      | 0.55                             | 3.58E-06            | 0.00346    | -0.61                               | 0.10 | 5.96E-02 | -0.48       | 0.04  | 1.75E-02 | -0.55        | 0.11  | 9.99E-02 | -1.61    | 0.15  | 7.82E-04 | -0.52    | 0.14  | 3.83E-02 | -1.21        | 0.24  | 1.37E-03 | -1.60        | 0.11  | 6.47E-05 | -0.40       | 0.03  | 8.71E-02 |          |
| AGR3     | No            | Yes            | No                                     | Down                      | 0.55                             | 1.83E-19            | 0.00179    | -0.76                               | 0.11 | 1.50E-03 | -0.88       | 0.04  | 1.36E-06 | -0.66        | 0.11  | 4.81E-03 | -0.91    | 0.12  | 1.30E-03 | -0.96    | 0.15  | 1.95E-03 | -1.09        | 0.23  | 8.76E-03 | -0.90        | 0.10  | 3.36E-04 | -0.81       | 0.03  | 1.00E-20 |          |
| F11R     | No            | No             | No                                     | Down                      | 0.55                             | 1.83E-19            | validated  | -0.11                               | 0.10 | 7.53E-01 | -0.85       | 0.04  | 5.43E-05 | -0.49        | 0.10  | 1.32E-01 | -1.48    | 0.14  | 1.17E-04 | -0.84    | 0.15  | 1.68E-02 | -1.80        | 0.28  | 1.57E-03 | -0.75        | 0.10  | 1.33E-02 | -0.67       | 0.03  | 3.43E-04 |          |
| LAMC2    | No            | No             | No                                     | Down                      | 0.55                             | 1.83E-19            | 0.03406    | -0.57                               | 0.10 | 3.57E-02 | -0.63       | 0.04  | 1.89E-04 | -0.47        | 0.10  | 6.56E-02 | -1.26    | 0.13  | 7.75E-05 | -1.37    | 0.16  | 1.73E-04 | -1.34        | 0.24  | 1.01E-03 | -0.45        | 0.10  | 7.24E-02 | -0.88       | 0.03  | 2.04E-06 |          |
| PDLM11   | No            | Yes            | Yes                                    | Down                      | 0.55                             | 1.83E-19            | 0.00533    | -0.57                               | 0.10 | 5.07E-02 | -0.98       | 0.04  | 5.00E-06 | -1.01        | 0.11  | 2.64E-03 | -0.44    | 0.12  | 1.33E-01 | -1.14    | 0.16  | 4.44E-04 | -1.29        | 0.24  | 9.52E-04 | -0.24        | 0.10  | 3.08E-01 | -1.28       | 0.04  | 1.00E-20 |          |
| FKBP11   | No            | Yes            | No                                     | Down                      | 0.55                             | 1.83E-19            | 1.5E-19    | -1.40                               | 0.12 | 2.73E-05 | -0.73       | 0.04  | 2.38E-04 | -0.73        | 0.11  | 1.09E-02 | -1.10    | 0.13  | 2.63E-03 | -0.87    | 0.15  | 3.24E-03 | -0.73        | 0.21  | 3.40E-02 | -0.73        | 0.10  | 1.47E-02 | -0.65       | 0.03  | 9.83E-03 |          |
| CPM      | No            | Yes            | Yes                                    | Down                      | 0.55                             | 1.83E-19            | 0.00011    | -0.92                               | 0.11 | 2.81E-04 | -0.68       | 0.04  | 3.79E-05 | -0.92        | 0.11  | 3.65E-04 | -0.69    | 0.12  | 1.48E-02 | -0.84    | 0.15  | 2.74E-02 | -1.32        | 0.24  | 4.58E-03 | -0.78        | 0.10  | 1.20E-03 | -0.76       | 0.03  | 2.04E-06 |          |
| COBL     | No            | Yes            | No                                     | Down                      | 0.55                             | 1.83E-19            | 0.02421    | -0.68                               | 0.11 | 6.23E-02 | -1.01       | 0.04  | 3.18E-06 | -0.31        | 0.10  | 1.64E-01 | -1.41    | 0.14  | 6.20E-05 | -1.02    | 0.15  | 2.57E-03 | -0.91        | 0.22  | 1.76E-02 | -0.92        | 0.10  | 1.86E-03 | -0.64       | 0.03  | 6.27E-05 |          |
| TMEM101  | No            | Yes            | No                                     | Down                      | 0.55                             | 1.83E-19            | 6E-05      | -0.                                 |      |          |             |       |          |              |       |          |          |       |          |          |       |          |              |       |          |              |       |          |             |       |          |          |

Supplementary Table 2. Details for 2,053 genes differentially expressed between EEC and NEEC, identified by microarray meta-analysis.  
 EEC - endometrioid endometrial cancer, NEEC - non-endometrioid endometrial cancer, SMD - Standardised Mean Difference, FDR - False Discovery Rate, Var - Variance

| Gene     | 145 gene list | 1253 gene list | Associated with EEC-specific survival? | Up/Down Regulated in NEEC | average standardised fold change | Microarray Meta FDR | RNAseq FDR | Individual microarray study results |      |          |             |      |          |              |      |          |          |      |          |          |      |          |              |      |          |              |      |          |             |      |          |
|----------|---------------|----------------|----------------------------------------|---------------------------|----------------------------------|---------------------|------------|-------------------------------------|------|----------|-------------|------|----------|--------------|------|----------|----------|------|----------|----------|------|----------|--------------|------|----------|--------------|------|----------|-------------|------|----------|
|          |               |                |                                        |                           |                                  |                     |            | TCGA                                |      |          | E-MTAB-2532 |      |          | E-GEOD-56026 |      |          | GSE32507 |      |          | GSE24537 |      |          | E-GEOD-23518 |      |          | E-GEOD-17025 |      |          | E-GEOD-2109 |      |          |
|          |               |                |                                        |                           |                                  |                     |            | SMD                                 | Var  | P-value  | SMD         | Var  | P-value  | SMD          | Var  | P-value  | SMD      | Var  | P-value  | SMD      | Var  | P-value  | SMD          | Var  | P-value  | SMD          | Var  | P-value  | SMD         | Var  | P-value  |
| NUDT9    | No            | No             | No                                     | Down                      | 0.56                             | 0.000637            | 0.03844    | -1.24                               | 0.12 | 5.65e-03 | -0.08       | 0.04 | 6.79e-01 | -0.16        | 0.10 | 6.33e-01 | -1.17    | 0.13 | 2.57e-02 | -1.03    | 0.15 | 6.02e-03 | -2.01        | 0.30 | 4.55e-04 | -0.29        | 0.10 | 3.50e-01 | -0.72       | 0.03 | 3.73e-02 |
| GSTZ1    | No            | Yes            | No                                     | Down                      | 0.56                             | 2.19E-05            | 0.00053    | -1.00                               | 0.11 | 3.13e-03 | -0.49       | 0.04 | 1.49E-02 | -0.63        | 0.11 | 5.44E-02 | -0.78    | 0.12 | 7.15E-02 | -0.90    | 0.15 | 6.16E-02 | -1.13        | 0.23 | 5.37E-02 | -0.83        | 0.10 | 3.33E-02 | -0.94       | 0.03 | 1.55E-04 |
| NQ01     | No            | Yes            | No                                     | Down                      | 0.56                             | 1.83E-19            | 1.5E-19    | -1.21                               | 0.11 | 2.50E-05 | -0.69       | 0.04 | 1.59E-04 | -1.24        | 0.12 | 3.98E-05 | -0.49    | 0.12 | 4.99E-02 | -0.34    | 0.14 | 1.27E-01 | -0.91        | 0.22 | 8.47E-03 | -0.78        | 0.10 | 1.88E-03 | -1.06       | 0.04 | 1.00E-20 |
| PKHD11   | No            | Yes            | No                                     | Down                      | 0.56                             | 1.83E-19            | 1.5E-19    | -0.67                               | 0.11 | 6.94E-03 | -0.82       | 0.04 | 3.18E-06 | -0.97        | 0.11 | 1.30E-04 | -0.46    | 0.12 | 4.67E-02 | -0.92    | 0.15 | 5.64E-03 | -0.88        | 0.22 | 2.38E-02 | -0.98        | 0.10 | 8.97E-05 | -0.97       | 0.03 | 1.00E-20 |
| SLC27A2  | No            | Yes            | No                                     | Down                      | 0.56                             | 1.83E-19            | 0.00025    | -0.63                               | 0.10 | 2.11E-02 | -1.11       | 0.04 | 6.82E-07 | -0.60        | 0.11 | 2.01E-02 | -0.91    | 0.12 | 2.88E-03 | -0.91    | 0.15 | 1.69E-02 | -0.65        | 0.21 | 1.04E-01 | -1.04        | 0.10 | 5.39E-04 | -0.81       | 0.03 | 2.25E-05 |
| TMPPRS13 | No            | Yes            | No                                     | Down                      | 0.56                             | 1.83E-19            | 1.5E-19    | -1.04                               | 0.11 | 1.51E-03 | -0.78       | 0.04 | 4.93E-05 | -0.64        | 0.11 | 3.01E-02 | -0.56    | 0.12 | 3.17E-02 | -1.10    | 0.15 | 2.99E-02 | -1.01        | 0.23 | 5.95E-02 | -0.99        | 0.10 | 5.10E-03 | -0.53       | 0.03 | 8.36E-04 |
| ELL3     | No            | Yes            | No                                     | Down                      | 0.56                             | 1.83E-19            | 0.00016    | -0.78                               | 0.11 | 9.52E-03 | -1.11       | 0.04 | 1.59E-06 | -1.06        | 0.11 | 2.69E-03 | -1.06    | 0.13 | 1.98E-03 | -0.63    | 0.14 | 1.81E-01 | -0.71        | 0.21 | 1.87E-01 | -0.74        | 0.10 | 1.53E-02 | -0.54       | 0.03 | 2.46E-02 |
| CLORF88  | No            | Yes            | No                                     | Down                      | 0.56                             | 1.83E-19            | 0.00388    | -0.76                               | 0.11 | 4.65E-03 | -0.90       | 0.04 | 9.09E-07 | -0.55        | 0.11 | 2.30E-02 | -1.29    | 0.13 | 9.20E-05 | -0.94    | 0.15 | 7.82E-02 | -0.54        | 0.21 | 3.42E-01 | -0.80        | 0.10 | 1.75E-03 | -0.84       | 0.03 | 1.59E-06 |
| CADPS2   | No            | Yes            | No                                     | Down                      | 0.56                             | 1.83E-19            | 4.1E-05    | -0.83                               | 0.11 | 3.98E-03 | -1.22       | 0.04 | 1.36E-06 | -0.97        | 0.11 | 1.12E-03 | -0.36    | 0.11 | 1.65E-01 | -0.21    | 0.14 | 2.83E-01 | -1.23        | 0.24 | 9.30E-03 | -1.14        | 0.10 | 1.76E-04 | -0.68       | 0.03 | 1.79E-03 |
| TMEM2    | No            | Yes            | No                                     | Down                      | 0.56                             | 1.83E-19            | 6.7E-06    | -1.33                               | 0.12 | 8.95E-05 | -0.32       | 0.04 | 5.37E-02 | -0.75        | 0.11 | 2.78E-02 | -0.82    | 0.12 | 2.67E-02 | -0.78    | 0.15 | 1.26E-02 | -1.71        | 0.27 | 1.12E-04 | -0.29        | 0.10 | 2.56E-01 | -0.63       | 0.03 | 1.24E-03 |
| P2RX4    | No            | Yes            | Yes                                    | Down                      | 0.56                             | 1.83E-19            | 0.00037    | -0.75                               | 0.11 | 1.68E-02 | -0.86       | 0.04 | 1.21E-04 | -0.66        | 0.11 | 3.66E-02 | -0.54    | 0.12 | 1.35E-01 | -1.05    | 0.15 | 3.64E-03 | -1.01        | 0.23 | 1.52E-02 | -1.04        | 0.10 | 4.25E-03 | -0.72       | 0.03 | 3.34E-03 |
| SH3RF2   | No            | Yes            | No                                     | Down                      | 0.56                             | 1.83E-19            | 7.6E-05    | -0.84                               | 0.11 | 6.14E-03 | -0.66       | 0.04 | 4.48E-03 | -1.21        | 0.11 | 1.54E-04 | -1.04    | 0.13 | 3.75E-03 | -0.69    | 0.14 | 5.50E-02 | -0.65        | 0.21 | 3.20E-01 | -0.77        | 0.10 | 3.81E-03 | -0.76       | 0.03 | 8.86E-06 |
| SFN      | No            | Yes            | No                                     | Down                      | 0.56                             | 1.83E-19            | 1.5E-19    | -1.10                               | 0.11 | 1.91E-04 | -0.71       | 0.04 | 6.36E-05 | -0.71        | 0.11 | 5.78E-03 | -1.15    | 0.13 | 9.70E-04 | -0.47    | 0.14 | 5.37E-02 | -0.74        | 0.21 | 1.96E-02 | -0.51        | 0.10 | 4.43E-02 | -1.20       | 0.04 | 1.00E-20 |
| CHST6    | No            | Yes            | No                                     | Down                      | 0.56                             | 1.83E-19            | 1.5E-19    | -0.44                               | 0.10 | 6.03E-02 | -0.77       | 0.04 | 1.00E-05 | -1.03        | 0.11 | 8.03E-04 | -1.08    | 0.13 | 5.05E-04 | -0.91    | 0.15 | 2.18E-02 | -0.58        | 0.21 | 1.90E-01 | -1.12        | 0.10 | 1.90E-04 | -0.68       | 0.03 | 5.45E-06 |
| RAB17    | No            | No             | No                                     | Down                      | 0.56                             | 1.83E-19            | validated  | -0.34                               | 0.10 | 2.53E-01 | -0.75       | 0.04 | 2.08E-04 | -0.39        | 0.10 | 1.91E-01 | -0.95    | 0.13 | 2.22E-03 | -1.40    | 0.17 | 1.24E-04 | -1.13        | 0.23 | 3.59E-03 | -0.96        | 0.10 | 1.04E-02 | -0.68       | 0.03 | 6.60E-04 |
| ELF5     | No            | Yes            | No                                     | Down                      | 0.56                             | 1.83E-19            | 1.5E-19    | -1.23                               | 0.12 | 1.27E-04 | -0.83       | 0.04 | 2.61E-05 | -1.00        | 0.11 | 4.10E-04 | -0.33    | 0.13 | 1.63E-01 | -0.90    | 0.15 | 3.09E-02 | -0.83        | 0.22 | 2.21E-02 | -0.98        | 0.10 | 2.08E-04 | -0.50       | 0.03 | 2.47E-03 |
| KLK11    | No            | No             | No                                     | Down                      | 0.57                             | 1.83E-19            | validated  | -1.43                               | 0.12 | 6.82E-07 | -0.99       | 0.04 | 1.00E-20 | -1.07        | 0.11 | 1.72E-04 | -1.02    | 0.13 | 2.78E-04 | -0.75    | 0.14 | 5.83E-03 | -0.24        | 0.20 | 2.80E-01 | -0.39        | 0.10 | 8.88E-02 | -0.69       | 0.03 | 1.59E-05 |
| TSPAN13  | No            | Yes            | No                                     | Down                      | 0.57                             | 1.83E-19            | 0.00024    | -1.12                               | 0.11 | 3.85E-04 | -0.73       | 0.04 | 8.25E-05 | -1.20        | 0.11 | 1.40E-03 | -1.05    | 0.13 | 5.86E-01 | -1.15    | 0.16 | 4.29E-04 | -0.81        | 0.22 | 1.98E-02 | -0.52        | 0.10 | 1.14E-01 | -0.60       | 0.03 | 4.91E-05 |
| MKNK2    | No            | Yes            | No                                     | Down                      | 0.57                             | 1.83E-19            | 3.1E-05    | -1.01                               | 0.11 | 8.04E-03 | -0.59       | 0.04 | 2.52E-03 | -1.33        | 0.12 | 9.28E-02 | -0.58    | 0.12 | 9.24E-02 | -0.70    | 0.14 | 1.34E-02 | -0.74        | 0.21 | 2.40E-02 | -0.26        | 0.10 | 3.80E-01 | -1.38       | 0.04 | 1.36E-06 |
| CHMP2A   | No            | No             | No                                     | Down                      | 0.57                             | 1.14E-05            | 0.03166    | -0.52                               | 0.10 | 1.58E-01 | -0.79       | 0.04 | 2.34E-03 | -0.78        | 0.11 | 3.50E-02 | -0.34    | 0.11 | 4.52E-01 | -0.95    | 0.15 | 3.30E-03 | -1.23        | 0.24 | 3.53E-03 | -0.96        | 0.10 | 2.09E-03 | -0.98       | 0.03 | 4.30E-03 |
| MARK6    | No            | Yes            | No                                     | Down                      | 0.57                             | 1.14E-05            | 0.00453    | -0.55                               | 0.10 | 1.02E-01 | -0.74       | 0.04 | 1.52E-03 | -1.36        | 0.12 | 2.92E-03 | -0.14    | 0.11 | 7.30E-01 | -1.44    | 0.17 | 2.91E-04 | -0.60        | 0.21 | 7.30E-02 | -0.89        | 0.10 | 8.18E-03 | -0.81       | 0.03 | 1.49E-02 |
| GCNT1    | No            | Yes            | No                                     | Down                      | 0.57                             | 1.83E-19            | 1.5E-19    | -0.42                               | 0.10 | 9.07E-02 | -1.24       | 0.04 | 1.00E-20 | -0.58        | 0.11 | 3.64E-02 | -0.75    | 0.12 | 1.21E-02 | -0.79    | 0.15 | 6.60E-03 | -0.94        | 0.22 | 7.24E-03 | -0.87        | 0.10 | 1.92E-03 | -0.96       | 0.03 | 1.98E-05 |
| NTSE     | No            | Yes            | No                                     | Down                      | 0.57                             | 1.83E-19            | 1.5E-19    | -1.33                               | 0.12 | 1.68E-05 | -1.08       | 0.04 | 1.00E-20 | -0.66        | 0.11 | 7.28E-03 | -0.19    | 0.11 | 4.16E-01 | -0.72    | 0.14 | 2.01E-02 | -0.87        | 0.22 | 2.08E-02 | -0.88        | 0.10 | 7.97E-04 | -0.82       | 0.03 | 9.31E-06 |
| LSM7     | No            | Yes            | No                                     | Down                      | 0.57                             | 1.14E-05            | 1.5E-19    | -1.10                               | 0.11 | 8.41E-03 | -0.55       | 0.04 | 2.00E-02 | -0.76        | 0.11 | 3.10E-02 | -1.18    | 0.13 | 3.15E-02 | -0.54    | 0.14 | 4.69E-02 | -0.42        | 0.20 | 1.44E-01 | -1.50        | 0.11 | 2.27E-05 | -0.48       | 0.03 | 6.23E-02 |
| ICAM3    | No            | Yes            | No                                     | Down                      | 0.57                             | 6.71E-06            | 0.0057     | -0.38                               | 0.10 | 2.08E-01 | -0.44       | 0.04 | 2.04E-02 | -1.52        | 0.12 | 5.68E-04 | -0.75    | 0.12 | 7.40E-02 | -1.08    | 0.15 | 4.90E-03 | -0.60        | 0.21 | 9.54E-02 | -0.90        | 0.10 | 6.07E-03 | -0.86       | 0.03 | 4.17E-04 |
| LRG1     | No            | No             | No                                     | Down                      | 0.57                             | 1.83E-19            | validated  | -0.59                               | 0.10 | 1.21E-02 | -0.99       | 0.04 | 6.82E-07 | -0.69        | 0.11 | 9.50E-03 | -1.29    | 0.14 | 9.20E-05 | -0.82    | 0.15 | 8.34E-03 | -0.80        | 0.22 | 2.79E-02 | -0.60        | 0.10 | 3.47E-02 | -0.74       | 0.03 | 3.98E-05 |
| CYBA     | No            | No             | No                                     | Down                      | 0.57                             | 1.83E-19            | validated  | -0.38                               | 0.10 | 1.61E-01 | -0.84       | 0.04 | 5.86E-05 | -1.17        | 0.11 | 7.45E-04 | -1.66    | 0.15 | 1.96E-04 | -0.81    | 0.15 | 3.61E-03 | -0.36        | 0.20 | 1.53E-01 | -1.25        | 0.10 | 1.22E-04 | -0.04       | 0.03 | 8.08E-01 |
| MOGAT1   | No            | Yes            | No                                     | Down                      | 0.57                             | 1.83E-19            | 0.4371     | -0.93                               | 0.11 | 5.67E-04 | -0.70       | 0.04 | 3.43E-05 | -0.80        | 0.11 | 5.94E-03 | -1.71    | 0.15 | 4.54E-07 | -0.39    | 0.14 | 2.62E-01 | -0.72        | 0.21 | 3.05E-01 | -0.49        | 0.10 | 3.08E-02 | -0.77       | 0.03 | 9.09E-06 |
| RBBP7    | No            | Yes            | No                                     | Down                      | 0.57                             | 1.83E-19            | 0.5405     | -0.92                               | 0.11 | 4.04E-03 | -0.90       | 0.04 | 1.06E-04 | -0.79        | 0.11 | 2.21E-02 | -0.44    | 0.12 | 1.78E-01 | -1.00    | 0.15 | 3.94E-03 | -0.86        | 0.22 | 2.67E-02 | -0.83        | 0.10 | 7.35E-03 | -0.76       | 0.03 | 1.73E-03 |
| PAQR4    | No            | Yes            | No                                     | Down                      | 0.57                             | 1.14E-05            | 1.5E-19    | -0.78                               | 0.11 | 6.36E-02 | -0.61       | 0.04 | 1.64E-03 | -0.81        | 0.11 | 3.78E-02 | -0.28    | 0.11 | 3.96E-01 | -1.44    | 0.17 | 2.36E-04 | -1.12        | 0.23 | 1.34E-02 | -0.91        | 0.10 | 1.88E-02 | -0.54       | 0.03 | 2.01E-02 |
| PIAS3    | No            | Yes            | Yes                                    | Down                      | 0.57                             | 8.12E-05            | 0.00722    | -0.78                               | 0.11 | 3.30E-02 | -0.52       | 0.04 | 9.98E-03 | -0.84        | 0.11 | 1.50E-02 | -1.05    | 0.13 | 1.22E-02 | -0.65    | 0.14 | 9.26E-02 | -1.24        | 0.24 | 2.64E-02 | -0.59        | 0.10 | 6.81E-02 | -0.81       | 0.03 | 3.43E-03 |
| GALNT10  | No            | Yes            | No                                     | Down                      | 0.57                             | 1.83E-19            | 1.5E-19    | -0.87                               | 0.11 | 1.50E-02 | -0.77       | 0.04 | 3.36E-05 | -1.18        | 0.11 | 4.55E-04 | -1.13    | 0.11 | 6.82E-01 | -0.66    | 0.14 | 5.33E-02 | -0.91        | 0.22 | 3.84E-02 | -1.31        | 0.11 | 2.84E-05 | -0.65       | 0.03 | 1.88E-03 |
| BBS2     | No            | Yes            | No                                     | Down                      | 0.57                             | 9.46E-05            | 0.03088    | -1.24                               | 0.12 | 2.39E-03 | -0.45       | 0.04 | 3.43E-02 | -0.50        | 0.10 | 1.13E-01 | -1.00    | 0.13 | 3.28E-02 | -1.38    | 0.17 | 8.98E-04 | -0.70        | 0.21 | 9.27E-02 | -0.37        | 0.10 | 2.46E-01 | -0.84       | 0.03 | 8.28E-03 |
| CCDC113  | No            | Yes            | No                                     | Down                      | 0.57                             | 1.83E-19            | 0.00105    | -0.88                               | 0.11 | 1.21E-02 | -0.87       | 0.04 | 1.45E-05 | -0.67        | 0.11 | 1.25E-02 | -1.14    | 0.13 | 1.33E-03 | -0.97    | 0.15 | 5.38E-01 | -0.12        | 0.20 | 9.24E-01 | -1.14        | 0.10 | 6.72E-05 | -0.68       | 0.03 | 2.63E-04 |
| PLCB4    | No            | Yes            | No                                     | Down                      | 0.57                             | 1.83E-19            | 1.5E-19    | -0.89                               | 0.11 | 2.83E-03 | -0.69       | 0.04 | 4.15E-04 | -0.63        | 0.11 | 1.60E-02 | -0.80    | 0.12 | 1.19E-02 | -1.02    | 0.15 | 5.44E-02 | -0.96        | 0.22 | 8.95E-02 | -0.71        | 0.10 | 5.38E-03 | -0.77       | 0.03 | 3.43E-04 |
| TOX3     | No            | Yes            | No                                     | Down                      | 0.57                             | 1.83E-19            | 0.00023    | -0.87                               | 0.11 | 1.74E-03 | -0.48       | 0.04 | 1.14E-02 | -1.45        | 0.12 | 1.82E-06 | -0.71    | 0.12 | 1.34E-02 | -0.81    | 0.15 | 7.22E-02 | -0.48        | 0.21 | 3.88E-01 | -1.09        | 0.10 | 3.86E-05 | -0.58       | 0.03 | 1.54E-04 |
| SERPINA6 | No            | Yes            | No                                     | Down                      | 0.57                             | 1.83E-19            | 1.5E-19    | -0.96                               | 0.11 | 3.37E-04 | -0.92       | 0.04 | 6.82E-07 | -0.61        | 0.11 | 2.32E-02 | -1.19    | 0.13 | 2.44E-04 | -0.71    | 0.14 | 1.56E-01 | -0.80        | 0.22 | 3.66E-01 | -0.62        | 0.10 | 4.24E-02 | -0.65       | 0.03 | 2.27E-05 |
| TEX264   | No            | Yes            | No                                     | Down                      | 0.57                             | 0.000148            | 6.8E-05    |                                     |      |          |             |      |          |              |      |          |          |      |          |          |      |          |              |      |          |              |      |          |             |      |          |



Supplementary Table 2. Details for 2,053 genes differentially expressed between EEC and NEEC, identified by microarray meta-analysis.  
 EEC - endometrioid endometrial cancer, NEEC - non-endometrioid endometrial cancer, SMD - Standardised Mean Difference, FDR - False Discovery Rate, Var - Variance

| Gene       | 145 gene list | 1253 gene list | Associated with EEC-specific survival? | Up/Down Regulated in NEEC | average standardised fold change | Microarray Meta FDR | RNAseq FDR | Individual microarray study results |      |          |             |      |          |              |      |          |          |      |          |       |          |          |       |      |              |       |      |              |       |      |             |  |  |
|------------|---------------|----------------|----------------------------------------|---------------------------|----------------------------------|---------------------|------------|-------------------------------------|------|----------|-------------|------|----------|--------------|------|----------|----------|------|----------|-------|----------|----------|-------|------|--------------|-------|------|--------------|-------|------|-------------|--|--|
|            |               |                |                                        |                           |                                  |                     |            | TCGA                                |      |          | E-MTAB-2532 |      |          | E-GEOD-56026 |      |          | GSE32507 |      |          |       | GSE24537 |          |       |      | E-GEOD-23518 |       |      | E-GEOD-17025 |       |      | E-GEOD-2109 |  |  |
|            |               |                |                                        |                           |                                  |                     |            | SMD                                 | Var  | P-value  | SMD         | Var  | P-value  | SMD          | Var  | P-value  | SMD      | Var  | P-value  | SMD   | Var      | P-value  | SMD   | Var  | P-value      | SMD   | Var  | P-value      | SMD   | Var  | P-value     |  |  |
| SLC6A6     | No            | Yes            | No                                     | Down                      | 0.58                             | 3.97E-05            | 0.00075    | -0.81                               | 0.11 | 2.87E-02 | -0.69       | 0.04 | 8.82E-04 | -1.12        | 0.11 | 2.79E-03 | -0.95    | 0.13 | 8.24E-03 | -0.31 | 0.14     | 5.83E-01 | -1.44 | 0.25 | 2.49E-01     | -0.43 | 0.10 | 1.24E-01     | -0.55 | 0.03 | 9.30E-04    |  |  |
| SIDT1      | No            | Yes            | No                                     | Down                      | 0.58                             | 1.83E-19            | 1.5E-19    | -0.59                               | 0.10 | 3.00E-02 | -1.42       | 0.04 | 1.00E-20 | -0.78        | 0.11 | 4.10E-03 | -0.64    | 0.12 | 2.18E-02 | -0.67 | 0.14     | 1.73E-01 | -0.78 | 0.22 | 1.72E-01     | -0.76 | 0.10 | 3.40E-03     | -0.66 | 0.03 | 6.84E-04    |  |  |
| CCDC11     | No            | Yes            | No                                     | Down                      | 0.58                             | 1.83E-19            | 0.00361    | -0.76                               | 0.11 | 2.94E-03 | -0.61       | 0.04 | 2.79E-04 | -0.62        | 0.11 | 1.54E-02 | -1.05    | 0.13 | 8.18E-04 | -1.05 | 0.15     | 7.93E-02 | -0.80 | 0.22 | 3.47E-01     | -0.80 | 0.10 | 2.45E-03     | -0.58 | 0.03 | 8.76E-04    |  |  |
| ARFIP2     | No            | Yes            | No                                     | Down                      | 0.58                             | 0.00028             | 0.00016    | -0.70                               | 0.11 | 6.13E-02 | -1.25       | 0.04 | 3.43E-05 | -0.40        | 0.10 | 2.41E-01 | -1.40    | 0.14 | 1.32E-02 | -0.15 | 0.14     | 7.22E-01 | -0.51 | 0.21 | 4.08E-01     | -1.28 | 0.10 | 4.67E-03     | -0.58 | 0.03 | 4.62E-02    |  |  |
| DLX5       | No            | Yes            | No                                     | Down                      | 0.58                             | 1.83E-19            | 1.5E-19    | -1.01                               | 0.11 | 3.26E-04 | -0.51       | 0.04 | 2.19E-03 | -0.56        | 0.11 | 2.13E-02 | -0.53    | 0.12 | 4.79E-02 | -0.79 | 0.15     | 4.83E-03 | -1.36 | 0.25 | 4.01E-04     | -1.08 | 0.10 | 1.38E-04     | -0.44 | 0.03 | 2.45E-03    |  |  |
| INTS9      | No            | Yes            | No                                     | Down                      | 0.58                             | 8.89E-05            | 1.5E-19    | -1.37                               | 0.12 | 2.47E-03 | -0.89       | 0.04 | 5.53E-04 | -1.14        | 0.11 | 8.65E-03 | -0.60    | 0.12 | 1.61E-01 | -0.65 | 0.14     | 3.19E-02 | -0.62 | 0.21 | 1.18E-01     | -0.75 | 0.10 | 4.06E-02     | -0.25 | 0.03 | 1.54E-01    |  |  |
| KIAA1244   | No            | Yes            | No                                     | Down                      | 0.58                             | 1.83E-19            | 1.5E-19    | -1.23                               | 0.12 | 2.59E-04 | -0.90       | 0.04 | 2.79E-05 | -0.82        | 0.11 | 5.11E-03 | -0.56    | 0.12 | 4.36E-02 | -0.53 | 0.14     | 3.59E-01 | -0.99 | 0.22 | 2.02E-01     | -0.83 | 0.10 | 4.16E-03     | -0.41 | 0.03 | 1.43E-02    |  |  |
| SORD       | No            | Yes            | No                                     | Down                      | 0.58                             | 1.83E-19            | 0.00036    | -0.92                               | 0.11 | 4.20E-03 | -1.13       | 0.04 | 4.54E-07 | -0.91        | 0.11 | 2.13E-03 | -1.27    | 0.13 | 4.85E-04 | -0.50 | 0.14     | 6.06E-02 | -0.05 | 0.20 | 8.66E-01     | -0.63 | 0.10 | 1.53E-02     | -0.67 | 0.03 | 3.57E-05    |  |  |
| PHYHD1     | No            | Yes            | No                                     | Down                      | 0.58                             | 1.83E-19            | 0.0001     | -0.73                               | 0.11 | 6.51E-03 | -0.85       | 0.04 | 9.77E-06 | -0.96        | 0.11 | 2.36E-03 | -1.34    | 0.14 | 1.22E-04 | -0.59 | 0.14     | 1.60E-01 | -0.77 | 0.21 | 1.80E-01     | -0.33 | 0.10 | 1.92E-01     | -0.68 | 0.03 | 5.90E-04    |  |  |
| CPNE2      | No            | Yes            | No                                     | Down                      | 0.58                             | 3.58E-06            | 2E-05      | -0.87                               | 0.11 | 5.72E-03 | -1.06       | 0.04 | 1.05E-05 | -0.97        | 0.11 | 3.61E-03 | -0.87    | 0.12 | 2.07E-02 | -0.17 | 0.14     | 5.65E-01 | -1.13 | 0.23 | 7.71E-02     | -0.39 | 0.10 | 1.45E-01     | -0.79 | 0.03 | 8.31E-04    |  |  |
| TNNIBP1    | No            | Yes            | No                                     | Down                      | 0.58                             | 1.14E-05            | 0.00014    | -1.59                               | 0.12 | 6.86E-05 | -0.52       | 0.04 | 1.21E-02 | -0.29        | 0.10 | 4.09E-01 | -0.20    | 0.11 | 6.30E-01 | -0.96 | 0.15     | 9.98E-03 | -0.92 | 0.22 | 2.19E-02     | -0.99 | 0.10 | 1.30E-02     | -0.77 | 0.03 | 2.98E-03    |  |  |
| HS3ST1     | No            | Yes            | No                                     | Down                      | 0.58                             | 1.83E-19            | 1.5E-19    | -1.33                               | 0.12 | 2.68E-05 | -1.20       | 0.04 | 2.27E-07 | -0.64        | 0.11 | 1.35E-02 | -0.63    | 0.12 | 2.82E-02 | -0.74 | 0.14     | 1.64E-02 | -0.85 | 0.22 | 2.81E-02     | -0.50 | 0.10 | 3.85E-02     | -0.33 | 0.03 | 3.93E-02    |  |  |
| RG9MTD2    | No            | No             | No                                     | Down                      | 0.58                             | 5.61E-05            | validated  | -0.79                               | 0.11 | 1.63E-02 | -0.97       | 0.04 | 2.26E-04 | -0.81        | 0.11 | 1.21E-02 | -1.29    | 0.14 | 3.95E-03 | -0.45 | 0.14     | 3.10E-01 | -0.87 | 0.22 | 1.63E-01     | -0.75 | 0.10 | 2.19E-02     | -0.31 | 0.03 | 1.07E-01    |  |  |
| MCC2       | No            | No             | No                                     | Down                      | 0.58                             | 6.71E-06            | validated  | -0.85                               | 0.11 | 1.09E-02 | -0.70       | 0.04 | 1.36E-03 | -0.49        | 0.10 | 6.34E-02 | -1.65    | 0.15 | 7.07E-04 | -1.08 | 0.15     | 7.59E-03 | -0.60 | 0.21 | 1.11E-01     | -0.17 | 0.10 | 4.89E-01     | -0.69 | 0.03 | 8.25E-04    |  |  |
| XG         | No            | Yes            | No                                     | Down                      | 0.58                             | 1.83E-19            | 1.5E-19    | -0.62                               | 0.10 | 7.88E-03 | -0.73       | 0.04 | 2.86E-05 | -1.06        | 0.11 | 1.25E-04 | -0.57    | 0.12 | 1.67E-02 | -0.69 | 0.14     | 3.93E-01 | -0.62 | 0.21 | 5.06E-01     | -1.31 | 0.11 | 3.86E-06     | -0.61 | 0.03 | 4.89E-04    |  |  |
| HLA-DMB    | No            | No             | No                                     | Down                      | 0.58                             | 1.83E-19            | validated  | -1.10                               | 0.10 | 7.01E-01 | -1.00       | 0.04 | 6.82E-07 | -0.83        | 0.11 | 4.73E-03 | -0.97    | 0.13 | 3.11E-03 | -0.52 | 0.14     | 3.35E-02 | -0.92 | 0.22 | 5.54E-03     | -1.13 | 0.10 | 1.78E-04     | -0.75 | 0.03 | 2.26E-04    |  |  |
| SPECC1     | No            | No             | No                                     | Down                      | 0.58                             | 1.83E-19            | validated  | -0.32                               | 0.10 | 2.10E-01 | -1.10       | 0.04 | 6.82E-07 | -0.98        | 0.11 | 1.80E-03 | -1.32    | 0.14 | 1.22E-04 | -0.84 | 0.15     | 3.95E-01 | -0.29 | 0.20 | 7.10E-01     | -0.53 | 0.10 | 4.48E-02     | -0.82 | 0.03 | 2.73E-06    |  |  |
| GREB1      | No            | Yes            | No                                     | Down                      | 0.58                             | 1.83E-19            | 1.5E-19    | -1.12                               | 0.11 | 4.45E-04 | -0.75       | 0.04 | 5.04E-05 | -0.49        | 0.10 | 3.85E-02 | -0.83    | 0.12 | 2.92E-03 | -0.89 | 0.15     | 3.24E-02 | -0.53 | 0.21 | 1.79E-01     | -0.69 | 0.10 | 6.78E-03     | -0.90 | 0.03 | 1.36E-06    |  |  |
| ANKMY1     | No            | No             | No                                     | Down                      | 0.58                             | 3.58E-06            | validated  | -0.55                               | 0.10 | 6.79E-02 | -0.73       | 0.04 | 4.91E-04 | -0.52        | 0.11 | 1.35E-01 | -1.44    | 0.14 | 4.22E-04 | -0.88 | 0.15     | 5.54E-03 | -0.88 | 0.22 | 5.35E-02     | -0.63 | 0.10 | 9.21E-02     | -0.57 | 0.03 | 9.10E-04    |  |  |
| FAAH       | No            | Yes            | No                                     | Down                      | 0.59                             | 4.80E-05            | 0.00208    | -1.03                               | 0.11 | 6.24E-03 | -0.65       | 0.04 | 3.22E-03 | -0.44        | 0.10 | 1.87E-01 | -1.61    | 0.15 | 3.71E-04 | -0.43 | 0.14     | 1.65E-01 | -1.09 | 0.23 | 2.84E-02     | -0.32 | 0.10 | 2.61E-01     | -0.62 | 0.03 | 6.88E-03    |  |  |
| ACP6       | No            | Yes            | No                                     | Down                      | 0.59                             | 1.14E-05            | 0.00651    | -0.63                               | 0.10 | 4.90E-02 | -0.68       | 0.04 | 1.08E-03 | -0.67        | 0.11 | 3.48E-02 | -0.88    | 0.12 | 2.86E-02 | -0.75 | 0.14     | 5.78E-02 | -0.65 | 0.21 | 1.32E-01     | -1.14 | 0.10 | 9.59E-04     | -0.77 | 0.03 | 2.99E-03    |  |  |
| FAM83E     | No            | No             | No                                     | Down                      | 0.59                             | 3.58E-05            | 0.01527    | -0.47                               | 0.10 | 9.87E-02 | -0.95       | 0.04 | 1.98E-05 | -1.03        | 0.11 | 7.54E-03 | -0.99    | 0.13 | 5.54E-03 | -1.15 | 0.16     | 4.75E-02 | -1.10 | 0.23 | 1.07E-01     | -0.06 | 0.10 | 8.50E-01     | -0.41 | 0.03 | 2.17E-02    |  |  |
| ATP1F1     | No            | Yes            | No                                     | Down                      | 0.59                             | 9.46E-05            | 0.0002     | -0.22                               | 0.10 | 5.17E-01 | -0.55       | 0.04 | 1.64E-02 | -0.34        | 0.10 | 2.64E-01 | -1.52    | 0.14 | 2.51E-03 | -0.71 | 0.14     | 1.66E-02 | -1.59 | 0.26 | 2.22E-04     | -0.95 | 0.10 | 8.49E-03     | -0.26 | 0.03 | 2.90E-01    |  |  |
| DNAH9      | No            | Yes            | No                                     | Down                      | 0.59                             | 1.83E-19            | 1.5E-19    | -1.07                               | 0.11 | 4.07E-05 | -0.95       | 0.04 | 6.82E-07 | -0.77        | 0.11 | 6.06E-03 | -0.98    | 0.13 | 8.06E-04 | -0.46 | 0.14     | 1.11E-01 | -0.50 | 0.21 | 1.57E-01     | -0.79 | 0.10 | 2.83E-03     | -0.63 | 0.03 | 6.02E-05    |  |  |
| HEBP2      | No            | No             | No                                     | Down                      | 0.59                             | 2.85E-05            | validated  | -0.89                               | 0.11 | 1.25E-02 | -0.67       | 0.04 | 1.36E-03 | -1.03        | 0.11 | 1.04E-02 | -0.74    | 0.12 | 8.25E-02 | -0.31 | 0.14     | 1.76E-01 | -1.47 | 0.25 | 1.65E-03     | -0.07 | 0.10 | 7.73E-01     | -0.95 | 0.03 | 1.85E-03    |  |  |
| C20ORF85   | No            | Yes            | No                                     | Down                      | 0.59                             | 1.83E-19            | 2.3E-06    | -0.68                               | 0.11 | 2.61E-03 | -0.92       | 0.04 | 1.00E-20 | -0.63        | 0.11 | 6.27E-03 | -0.76    | 0.12 | 2.79E-03 | -0.95 | 0.15     | 2.12E-03 | -0.76 | 0.21 | 3.62E-02     | -0.72 | 0.10 | 2.68E-03     | -0.70 | 0.03 | 9.09E-07    |  |  |
| ETS2       | No            | Yes            | No                                     | Down                      | 0.59                             | 1.83E-19            | 0.00246    | -1.19                               | 0.11 | 4.70E-04 | -0.87       | 0.04 | 1.73E-05 | -0.84        | 0.11 | 1.15E-02 | -0.31    | 0.11 | 3.21E-01 | -0.75 | 0.14     | 1.01E-02 | -0.75 | 0.21 | 2.62E-02     | -0.58 | 0.10 | 2.82E-02     | -0.83 | 0.03 | 1.20E-04    |  |  |
| AKAP7      | No            | Yes            | No                                     | Down                      | 0.59                             | 1.83E-19            | 0.04129    | -1.10                               | 0.11 | 3.18E-04 | -1.01       | 0.04 | 4.32E-06 | -0.67        | 0.11 | 1.38E-02 | -0.46    | 0.12 | 1.12E-01 | -0.87 | 0.15     | 8.31E-03 | -0.79 | 0.22 | 2.95E-02     | -0.54 | 0.10 | 3.23E-02     | -0.70 | 0.03 | 1.99E-03    |  |  |
| PSMB10     | No            | No             | No                                     | Down                      | 0.59                             | 3.58E-06            | 0.02745    | -0.49                               | 0.10 | 8.10E-02 | -0.63       | 0.04 | 1.70E-03 | -0.73        | 0.11 | 8.85E-02 | -1.29    | 0.13 | 2.25E-03 | -0.60 | 0.14     | 2.62E-02 | -0.78 | 0.22 | 1.78E-02     | -0.88 | 0.10 | 4.73E-03     | -0.70 | 0.03 | 1.68E-03    |  |  |
| RIBC2      | No            | Yes            | No                                     | Down                      | 0.59                             | 1.83E-19            | 0.00071    | -1.10                               | 0.11 | 9.38E-05 | -0.48       | 0.04 | 2.36E-03 | -0.62        | 0.11 | 2.49E-02 | -0.39    | 0.12 | 1.45E-01 | -1.23 | 0.16     | 2.14E-01 | -0.75 | 0.21 | 5.21E-01     | -0.74 | 0.10 | 1.01E-02     | -0.79 | 0.03 | 9.09E-07    |  |  |
| C10ORF57   | No            | Yes            | No                                     | Down                      | 0.59                             | 3.58E-06            | 0.00206    | -0.78                               | 0.11 | 2.42E-02 | -0.99       | 0.04 | 2.07E-05 | -0.72        | 0.11 | 3.41E-01 | -1.27    | 0.16 | 6.07E-04 | -0.90 | 0.22     | 1.87E-02 | -0.67 | 0.10 | 4.48E-02     | -0.44 | 0.03 | 3.84E-02     | -0.74 | 0.03 | 1.00E-04    |  |  |
| ST6GALNAC2 | No            | Yes            | Yes                                    | Down                      | 0.59                             | 1.83E-19            | 0.00155    | -0.48                               | 0.10 | 4.27E-02 | -0.87       | 0.04 | 7.22E-06 | -0.19        | 0.10 | 4.21E-01 | -1.07    | 0.13 | 7.47E-04 | -0.99 | 0.15     | 3.17E-02 | -0.50 | 0.21 | 3.17E-01     | -0.89 | 0.10 | 3.28E-03     | -1.09 | 0.04 | 1.00E-04    |  |  |
| TTCT19     | No            | Yes            | No                                     | Down                      | 0.59                             | 2.19E-05            | 0.00122    | -0.75                               | 0.11 | 2.77E-02 | -0.99       | 0.04 | 4.73E-04 | -0.56        | 0.11 | 9.28E-02 | -1.16    | 0.11 | 6.97E-01 | -0.90 | 0.15     | 6.09E-03 | -1.02 | 0.23 | 9.19E-03     | -0.44 | 0.10 | 1.10E-01     | -1.26 | 0.04 | 6.65E-04    |  |  |
| GRAMD3     | No            | No             | No                                     | Down                      | 0.59                             | 3.58E-06            | validated  | -0.29                               | 0.10 | 2.95E-01 | -0.84       | 0.04 | 2.63E-04 | -0.64        | 0.11 | 2.24E-02 | -0.93    | 0.12 | 7.79E-03 | -1.07 | 0.15     | 6.18E-03 | -1.04 | 0.23 | 2.06E-02     | -0.29 | 0.10 | 2.03E-01     | -0.97 | 0.03 | 1.49E-04    |  |  |
| KCTD14     | No            | Yes            | No                                     | Down                      | 0.59                             | 1.83E-19            | 1.5E-19    | -0.89                               | 0.11 | 1.49E-03 | -0.86       | 0.04 | 1.84E-05 | -0.65        | 0.11 | 1.26E-02 | -0.41    | 0.12 | 1.26E-01 | -0.57 | 0.14     | 3.21E-02 | -0.78 | 0.22 | 3.01E-02     | -1.16 | 0.10 | 9.97E-05     | -0.76 | 0.03 | 1.83E-04    |  |  |
| RFK        | No            | No             | No                                     | Down                      | 0.59                             | 0.00239             | validated  | -0.53                               | 0.10 | 8.06E-02 | -0.54       | 0.04 | 5.76E-03 | -0.64        | 0.11 | 4.46E-02 | -1.04    | 0.13 | 1.35E-02 | -1.21 | 0.16     | 2.87E-01 | -1.48 | 0.25 | 1.91E-01     | -0.04 | 0.10 | 8.45E-01     | -0.59 | 0.03 | 2.36E-02    |  |  |
| GCNT2      | No            | Yes            | No                                     | Down                      | 0.59                             | 1.83E-19            | 1.9E-05    | -0.91                               | 0.11 | 2.75E-03 | -0.64       | 0.04 | 2.56E-03 | -0.47        | 0.10 | 7.64E-02 | -1.64    | 0.12 | 2.55E-02 | -0.35 | 0.14     | 1.92E-01 | -0.93 | 0.22 | 3.81E-02     | -1.46 | 0.11 | 8.18E-06     | -0.66 | 0.03 | 2.74E-04    |  |  |
| TSKU       | No            | Yes            | No                                     | Down                      | 0.59                             | 3.58E-06            | 1.5E-19    | -1.28                               | 0.12 | 1.       |             |      |          |              |      |          |          |      |          |       |          |          |       |      |              |       |      |              |       |      |             |  |  |

**Supplementary Table 2. Details for 2,053 genes differentially expressed between EEC and NEEC, identified by microarray meta-analysis.**  
 EEC - endometrioid endometrial cancer, NEEC - non-endometrioid endometrial cancer, SMD - Standardised Mean Difference, FDR - False Discovery Rate, Var - Variance

| Gene     | 145 gene list | 1253 gene list | Associated with EEC-specific survival? | Up/Down Regulated in NEEC | average standardised fold change | Microarray Meta FDR | RNAseq FDR | Individual microarray study results |      |          |             |      |          |              |      |          |          |      |          |       |          |          |       |      |              |       |      |              |       |      |             |  |  |
|----------|---------------|----------------|----------------------------------------|---------------------------|----------------------------------|---------------------|------------|-------------------------------------|------|----------|-------------|------|----------|--------------|------|----------|----------|------|----------|-------|----------|----------|-------|------|--------------|-------|------|--------------|-------|------|-------------|--|--|
|          |               |                |                                        |                           |                                  |                     |            | TCGA                                |      |          | E-MTAB-2532 |      |          | E-GEOD-56026 |      |          | GSE32507 |      |          |       | GSE24537 |          |       |      | E-GEOD-23518 |       |      | E-GEOD-17025 |       |      | E-GEOD-2109 |  |  |
|          |               |                |                                        |                           |                                  |                     |            | SMD                                 | Var  | P-value  | SMD         | Var  | P-value  | SMD          | Var  | P-value  | SMD      | Var  | P-value  | SMD   | Var      | P-value  | SMD   | Var  | P-value      | SMD   | Var  | P-value      | SMD   | Var  | P-value     |  |  |
| MYO6     | No            | No             | No                                     | Down                      | 0.60                             | 1.83E-19            | validated  | -0.49                               | 0.10 | 8.52E-02 | -0.67       | 0.04 | 7.00E-04 | -0.52        | 0.11 | 8.62E-02 | -1.24    | 0.13 | 4.75E-04 | -0.60 | 0.14     | 9.38E-02 | -1.02 | 0.23 | 2.11E-02     | -0.24 | 0.10 | 3.11E-01     | -1.10 | 0.04 | 2.27E-07    |  |  |
| SCGB2A2  | No            | Yes            | Yes                                    | Down                      | 0.60                             | 1.83E-19            | 1.5E-19    | -1.11                               | 0.11 | 1.73E-05 | -0.73       | 0.04 | 9.31E-06 | -0.99        | 0.11 | 1.20E-04 | -0.35    | 0.11 | 1.13E-01 | -0.35 | 0.14     | 1.11E-01 | -0.47 | 0.21 | 8.87E-02     | -0.83 | 0.10 | 4.70E-04     | -1.03 | 0.04 | 1.00E-20    |  |  |
| ZNF516   | No            | Yes            | Yes                                    | Down                      | 0.60                             | 1.83E-19            | 2.3E-06    | -1.46                               | 0.12 | 8.18E-06 | -0.75       | 0.04 | 2.04E-04 | -0.24        | 0.10 | 3.04E-01 | -0.51    | 0.12 | 9.05E-02 | -0.50 | 0.14     | 9.61E-02 | -0.50 | 0.21 | 2.96E-01     | -1.15 | 0.10 | 2.78E-04     | -0.75 | 0.03 | 4.63E-04    |  |  |
| SAT2     | No            | Yes            | No                                     | Down                      | 0.60                             | 0.000211            | 1.5E-19    | -1.38                               | 0.12 | 1.02E-03 | -0.38       | 0.04 | 5.63E-02 | -0.99        | 0.11 | 1.47E-02 | -0.67    | 0.12 | 7.75E-02 | -0.07 | 0.14     | 6.96E-01 | -0.51 | 0.21 | 1.67E-01     | -1.32 | 0.11 | 4.53E-04     | -0.55 | 0.03 | 7.71E-02    |  |  |
| CISH     | No            | Yes            | No                                     | Down                      | 0.60                             | 1.66E-05            | 9.2E-05    | -1.12                               | 0.11 | 3.85E-03 | -0.54       | 0.04 | 3.39E-03 | -1.40        | 0.12 | 4.08E-04 | -0.04    | 0.11 | 8.75E-01 | -0.45 | 0.14     | 2.20E-01 | -1.07 | 0.23 | 3.92E-02     | -0.49 | 0.10 | 1.49E-01     | -0.75 | 0.03 | 4.05E-04    |  |  |
| AADAT    | No            | Yes            | No                                     | Down                      | 0.60                             | 1.83E-19            | 1.5E-19    | -0.90                               | 0.11 | 1.26E-02 | -0.95       | 0.04 | 1.48E-05 | -0.27        | 0.10 | 3.09E-01 | -1.04    | 0.13 | 1.98E-03 | -0.77 | 0.15     | 4.38E-02 | -0.15 | 0.20 | 5.91E-01     | -1.13 | 0.10 | 4.16E-04     | -0.63 | 0.03 | 2.52E-03    |  |  |
| ATP5D    | No            | Yes            | No                                     | Down                      | 0.60                             | 0.000108            | 0.00173    | -0.78                               | 0.11 | 2.16E-02 | -0.36       | 0.04 | 3.71E-02 | -1.12        | 0.11 | 5.55E-03 | -1.35    | 0.14 | 1.50E-03 | -0.52 | 0.14     | 4.31E-02 | -0.71 | 0.21 | 2.99E-02     | -0.96 | 0.10 | 1.03E-02     | -0.04 | 0.03 | 8.33E-01    |  |  |
| ZDHHC9   | No            | No             | No                                     | Down                      | 0.60                             | 4.44E-05            | 0.02336    | -0.76                               | 0.11 | 1.34E-02 | -0.18       | 0.04 | 2.95E-01 | -0.33        | 0.10 | 2.33E-01 | -1.23    | 0.13 | 2.71E-03 | -0.99 | 0.15     | 1.53E-03 | -1.46 | 0.25 | 5.47E-04     | -0.54 | 0.10 | 5.59E-02     | -0.35 | 0.03 | 9.58E-02    |  |  |
| NUDT13   | No            | Yes            | No                                     | Down                      | 0.60                             | 0.000266            | 5.2E-05    | -0.85                               | 0.11 | 1.16E-02 | -0.65       | 0.04 | 5.26E-03 | -1.00        | 0.11 | 7.17E-03 | -0.87    | 0.12 | 1.03E-02 | -0.66 | 0.14     | 4.51E-01 | -0.29 | 0.20 | 7.37E-01     | -0.93 | 0.10 | 1.54E-02     | -0.59 | 0.03 | 1.68E-02    |  |  |
| GSR      | No            | Yes            | No                                     | Down                      | 0.60                             | 3.58E-06            | 6.4E-05    | -0.78                               | 0.11 | 8.73E-03 | -0.85       | 0.04 | 9.47E-05 | -1.33        | 0.12 | 3.47E-04 | -0.06    | 0.11 | 8.33E-01 | -0.41 | 0.14     | 1.13E-01 | -0.99 | 0.22 | 4.37E-02     | -0.81 | 0.10 | 7.16E-03     | -0.61 | 0.03 | 4.18E-03    |  |  |
| TPP3     | No            | Yes            | No                                     | Down                      | 0.60                             | 1.83E-19            | 1.5E-19    | -0.94                               | 0.11 | 3.71E-04 | -0.76       | 0.04 | 7.95E-06 | -0.67        | 0.11 | 6.62E-03 | -0.32    | 0.11 | 2.26E-01 | -1.01 | 0.15     | 1.84E-03 | -0.70 | 0.21 | 6.11E-02     | -0.86 | 0.10 | 9.21E-04     | -0.55 | 0.03 | 1.20E-04    |  |  |
| RSPRY1   | No            | Yes            | No                                     | Down                      | 0.60                             | 0.000321            | 0.01636    | -0.63                               | 0.10 | 6.05E-02 | -1.38       | 0.04 | 3.34E-02 | -1.38        | 0.12 | 6.40E-04 | -0.74    | 0.12 | 1.31E-01 | -0.73 | 0.14     | 2.68E-02 | -0.59 | 0.21 | 8.55E-02     | -0.52 | 0.10 | 7.70E-02     | -0.71 | 0.03 | 1.70E-02    |  |  |
| IRAK4    | No            | Yes            | No                                     | Down                      | 0.61                             | 0.002764            | 0.01306    | -0.42                               | 0.10 | 1.93E-01 | -0.60       | 0.04 | 2.34E-02 | -1.05        | 0.11 | 1.18E-02 | -0.30    | 0.11 | 4.25E-01 | -0.68 | 0.14     | 2.51E-01 | -0.66 | 0.21 | 3.59E-01     | -1.05 | 0.10 | 3.59E-02     | -1.04 | 0.04 | 9.03E-04    |  |  |
| ITGB7    | No            | Yes            | No                                     | Down                      | 0.61                             | 7.73E-05            | 0.00968    | -0.43                               | 0.10 | 1.45E-01 | -0.75       | 0.04 | 1.63E-04 | -1.15        | 0.11 | 1.58E-02 | -1.17    | 0.13 | 1.17E-03 | -0.53 | 0.14     | 1.30E-01 | -0.80 | 0.22 | 6.66E-02     | -0.61 | 0.10 | 1.48E-01     | -1.35 | 0.03 | 5.70E-02    |  |  |
| ANKRD54  | No            | Yes            | No                                     | Down                      | 0.61                             | 0.001093            | 0.01551    | -0.75                               | 0.11 | 4.16E-02 | -0.72       | 0.04 | 2.80E-03 | -0.35        | 0.10 | 3.54E-01 | -1.42    | 0.14 | 8.81E-03 | -0.36 | 0.14     | 1.88E-01 | -0.68 | 0.21 | 1.15E-01     | -0.82 | 0.10 | 3.70E-02     | -0.68 | 0.03 | 2.88E-02    |  |  |
| ARL15    | No            | Yes            | No                                     | Down                      | 0.61                             | 0.000519            | 0.00105    | -1.05                               | 0.11 | 3.84E-03 | -0.83       | 0.04 | 3.58E-03 | -1.00        | 0.11 | 5.54E-03 | -0.21    | 0.11 | 5.29E-01 | -0.36 | 0.14     | 5.11E-01 | -0.77 | 0.21 | 4.73E-01     | -0.68 | 0.10 | 3.91E-02     | -0.89 | 0.03 | 3.46E-03    |  |  |
| TMOD3    | No            | Yes            | No                                     | Down                      | 0.61                             | 0.000623            | 0.01999    | -0.58                               | 0.10 | 7.25E-02 | -0.69       | 0.04 | 5.36E-03 | -1.35        | 0.12 | 9.21E-04 | -0.75    | 0.12 | 1.32E-01 | -1.15 | 0.16     | 6.04E-02 | -0.36 | 0.20 | 5.17E-01     | -0.33 | 0.10 | 2.10E-01     | -0.58 | 0.03 | 6.89E-03    |  |  |
| SERPINA5 | No            | Yes            | No                                     | Down                      | 0.61                             | 1.83E-19            | 2E-05      | -0.88                               | 0.11 | 3.53E-04 | -0.93       | 0.04 | 2.27E-07 | -0.39        | 0.10 | 6.73E-02 | -0.89    | 0.12 | 5.85E-04 | -0.77 | 0.15     | 4.98E-03 | -0.53 | 0.21 | 6.68E-02     | -0.66 | 0.10 | 6.03E-03     | -0.73 | 0.03 | 1.14E-06    |  |  |
| METAP1   | No            | Yes            | No                                     | Down                      | 0.61                             | 4.19E-05            | 0.00698    | -0.64                               | 0.11 | 5.02E-02 | -0.76       | 0.04 | 6.45E-04 | -0.62        | 0.11 | 7.88E-02 | -0.30    | 0.11 | 5.06E-01 | -0.75 | 0.14     | 8.82E-03 | -1.48 | 0.26 | 3.86E-04     | -0.38 | 0.10 | 2.30E-01     | -0.84 | 0.03 | 1.07E-02    |  |  |
| CBORF34  | No            | Yes            | No                                     | Down                      | 0.61                             | 8.51E-05            | 0.00093    | -0.61                               | 0.10 | 3.81E-02 | -0.54       | 0.04 | 1.75E-03 | -0.49        | 0.10 | 5.21E-02 | -0.62    | 0.12 | 5.27E-02 | -1.01 | 0.15     | 2.89E-02 | -1.49 | 0.26 | 2.64E-02     | -0.77 | 0.10 | 3.77E-03     | -0.25 | 0.03 | 7.93E-02    |  |  |
| NAT1     | No            | Yes            | No                                     | Down                      | 0.61                             | 3.58E-06            | 0.00066    | -0.24                               | 0.10 | 3.63E-01 | -0.74       | 0.04 | 2.38E-04 | -1.55        | 0.12 | 8.18E-06 | -0.83    | 0.12 | 1.60E-02 | -0.84 | 0.15     | 4.43E-02 | -0.34 | 0.20 | 5.34E-01     | -0.58 | 0.10 | 3.11E-02     | -0.66 | 0.03 | 3.52E-03    |  |  |
| USO1     | No            | No             | No                                     | Down                      | 0.61                             | 0.000125            | validated  | -1.13                               | 0.11 | 2.14E-03 | -0.54       | 0.04 | 1.83E-02 | -0.42        | 0.10 | 1.83E-01 | -0.26    | 0.11 | 5.01E-01 | -1.35 | 0.16     | 8.53E-04 | -0.89 | 0.22 | 2.36E-02     | -0.67 | 0.10 | 1.84E-02     | -0.52 | 0.03 | 7.25E-02    |  |  |
| HEXB     | No            | Yes            | No                                     | Down                      | 0.61                             | 6.71E-06            | 0.00036    | -0.12                               | 0.10 | 6.43E-01 | -0.67       | 0.04 | 5.44E-04 | -0.91        | 0.11 | 1.10E-02 | -0.03    | 0.11 | 9.26E-01 | -0.36 | 0.14     | 1.10E-01 | -1.82 | 0.28 | 2.82E-05     | -0.95 | 0.10 | 1.65E-03     | -0.91 | 0.03 | 5.53E-03    |  |  |
| GNPNAT1  | No            | Yes            | No                                     | Down                      | 0.61                             | 0.00016             | 0.00214    | -1.05                               | 0.11 | 4.86E-03 | -0.23       | 0.04 | 2.00E-01 | -1.31        | 0.12 | 2.20E-03 | -0.68    | 0.12 | 3.79E-02 | -0.51 | 0.14     | 4.19E-01 | -0.56 | 0.21 | 3.66E-01     | -1.19 | 0.10 | 4.51E-01     | -1.25 | 0.04 | 2.45E-05    |  |  |
| CAPSL    | No            | Yes            | No                                     | Down                      | 0.61                             | 1.83E-19            | 2.6E-05    | -0.33                               | 0.10 | 1.29E-01 | -0.80       | 0.04 | 3.41E-06 | -0.41        | 0.10 | 5.54E-02 | -0.77    | 0.12 | 6.05E-03 | -1.13 | 0.16     | 7.81E-04 | -0.82 | 0.22 | 2.81E-02     | -0.82 | 0.10 | 1.04E-03     | -0.70 | 0.03 | 2.04E-06    |  |  |
| FECH     | No            | No             | No                                     | Down                      | 0.61                             | 0.000121            | validated  | -0.61                               | 0.10 | 5.13E-02 | -0.31       | 0.04 | 5.95E-02 | -0.70        | 0.11 | 2.32E-02 | -0.94    | 0.12 | 1.83E-02 | -0.77 | 0.15     | 8.36E-02 | -1.04 | 0.23 | 7.03E-02     | -0.42 | 0.10 | 1.30E-01     | -0.97 | 0.03 | 8.70E-05    |  |  |
| CASB     | No            | Yes            | No                                     | Down                      | 0.61                             | 0.001896            | 0.01405    | -0.38                               | 0.10 | 2.48E-01 | -0.93       | 0.04 | 1.56E-04 | -0.45        | 0.10 | 2.67E-01 | -1.01    | 0.13 | 7.82E-03 | -0.89 | 0.15     | 1.77E-01 | -1.09 | 0.23 | 7.87E-02     | -0.83 | 0.10 | 8.99E-02     | -0.17 | 0.03 | 2.77E-01    |  |  |
| FLG1     | No            | Yes            | Yes                                    | Down                      | 0.61                             | 1.83E-19            | 1.5E-19    | -1.47                               | 0.12 | 1.00E-05 | -0.73       | 0.04 | 4.23E-05 | -0.74        | 0.11 | 3.04E-02 | -1.41    | 0.14 | 3.18E-05 | -0.21 | 0.14     | 3.35E-01 | -0.23 | 0.20 | 7.08E-01     | -0.68 | 0.10 | 1.18E-02     | -0.26 | 0.03 | 1.65E-01    |  |  |
| KCNKG    | No            | Yes            | No                                     | Down                      | 0.61                             | 1.83E-19            | 1.5E-19    | -0.52                               | 0.10 | 4.97E-02 | -0.84       | 0.04 | 3.23E-05 | -0.64        | 0.11 | 1.59E-02 | -0.75    | 0.12 | 2.91E-02 | -0.82 | 0.15     | 1.86E-02 | -0.55 | 0.21 | 2.96E-01     | -0.92 | 0.10 | 1.70E-03     | -0.70 | 0.03 | 6.84E-05    |  |  |
| PBLD     | No            | Yes            | No                                     | Down                      | 0.61                             | 0.00034             | 0.00351    | -0.59                               | 0.10 | 3.86E-02 | -0.81       | 0.04 | 9.93E-05 | -0.67        | 0.11 | 1.35E-02 | -1.21    | 0.13 | 1.99E-03 | -0.46 | 0.14     | 3.24E-01 | -1.64 | 0.27 | 1.23E-01     | -0.18 | 0.10 | 4.45E-01     | -0.17 | 0.03 | 3.35E-01    |  |  |
| CYP2J2   | No            | Yes            | No                                     | Down                      | 0.61                             | 1.83E-19            | 8.6E-05    | -0.91                               | 0.11 | 6.40E-04 | -0.67       | 0.04 | 1.10E-04 | -0.42        | 0.10 | 1.05E-01 | -0.65    | 0.12 | 2.07E-02 | -0.68 | 0.14     | 1.80E-02 | -0.76 | 0.21 | 3.39E-02     | -1.17 | 0.10 | 3.48E-04     | -0.48 | 0.03 | 3.21E-03    |  |  |
| FAM110C  | No            | No             | No                                     | Down                      | 0.61                             | 1.83E-19            | validated  | -0.12                               | 0.10 | 6.06E-01 | -0.90       | 0.04 | 2.50E-06 | -0.76        | 0.11 | 4.37E-03 | -1.13    | 0.13 | 1.51E-04 | -0.40 | 0.14     | 3.90E-01 | -0.75 | 0.21 | 2.96E-01     | -0.56 | 0.10 | 2.45E-02     | -1.10 | 0.04 | 1.00E-20    |  |  |
| MAN2A1   | No            | Yes            | No                                     | Down                      | 0.61                             | 2.85E-05            | 0.01492    | -1.00                               | 0.11 | 2.36E-03 | -0.46       | 0.04 | 1.60E-02 | -0.95        | 0.11 | 2.79E-03 | -0.52    | 0.12 | 1.98E-01 | -0.32 | 0.14     | 2.71E-01 | -1.01 | 0.23 | 1.74E-02     | -0.95 | 0.10 | 1.41E-03     | -0.51 | 0.03 | 4.01E-02    |  |  |
| CCDC17   | No            | Yes            | No                                     | Down                      | 0.61                             | 3.58E-06            | 0.00159    | -0.71                               | 0.11 | 5.31E-03 | -0.47       | 0.04 | 2.56E-03 | -0.65        | 0.11 | 1.79E-02 | -1.10    | 0.13 | 6.39E-04 | -0.60 | 0.14     | 5.60E-02 | -1.01 | 0.23 | 1.98E-01     | -0.61 | 0.10 | 1.98E-02     | -0.58 | 0.03 | 9.08E-04    |  |  |
| GREM2    | No            | Yes            | No                                     | Down                      | 0.61                             | 1.83E-19            | 1.5E-19    | -0.97                               | 0.11 | 1.99E-04 | -0.71       | 0.04 | 1.23E-05 | -0.89        | 0.11 | 8.71E-04 | -0.55    | 0.12 | 2.22E-02 | -0.73 | 0.14     | 3.36E-02 | -0.81 | 0.22 | 4.75E-02     | -0.79 | 0.10 | 1.60E-03     | -0.24 | 0.03 | 7.82E-02    |  |  |
| ARHGAP18 | No            | Yes            | No                                     | Down                      | 0.61                             | 6.71E-06            | 0.00092    | -1.19                               | 0.11 | 3.64E-04 | -0.94       | 0.04 | 8.68E-05 | -0.63        | 0.11 | 3.31E-02 | -0.47    | 0.12 | 1.98E-01 | -0.16 | 0.14     | 8.45E-01 | -0.58 | 0.21 | 6.29E-01     | -0.86 | 0.10 | 4.64E-03     | -0.86 | 0.03 | 3.86E-04    |  |  |
| STEAP2   | No            | Yes            | No                                     | Down                      | 0.61                             | 1.83E-19            | 1.3E-05    | -1.39                               | 0.12 | 3.32E-05 | -0.76       | 0.04 | 7.72E-05 | -1.12        | 0.11 | 2.67E-04 | -0.58    | 0.12 | 3.33E-02 | -0.22 | 0.14     | 4.05E-01 | -0.66 | 0.21 | 1.26E-01     | -0.45 | 0.10 | 8.16E-02     | -0.51 | 0.03 | 8.92E-03    |  |  |
| WDR38    | No            | Yes            | No                                     | Down                      | 0.61                             | 1.83E-19            | 0.00024    |                                     |      |          |             |      |          |              |      |          |          |      |          |       |          |          |       |      |              |       |      |              |       |      |             |  |  |

**Supplementary Table 2. Details for 2,053 genes differentially expressed between EEC and NEEC, identified by microarray meta-analysis.**  
 EEC - endometrioid endometrial cancer, NEEC - non-endometrioid endometrial cancer, SMD - Standardised Mean Difference, FDR - False Discovery Rate, Var - Variance

| Gene      | 145 gene list | 1253 gene list | Associated with EEC-specific survival? | Up/Down Regulated in NEEC | average standardised fold change | Microarray Meta FDR | RNAseq FDR | Individual microarray study results |      |          |             |      |          |              |      |          |          |      |          |          |      |          |              |      |          |              |      |          |             |      |          |
|-----------|---------------|----------------|----------------------------------------|---------------------------|----------------------------------|---------------------|------------|-------------------------------------|------|----------|-------------|------|----------|--------------|------|----------|----------|------|----------|----------|------|----------|--------------|------|----------|--------------|------|----------|-------------|------|----------|
|           |               |                |                                        |                           |                                  |                     |            | TCGA                                |      |          | E-MTAB-2532 |      |          | E-GEOD-56026 |      |          | GSE32507 |      |          | GSE24537 |      |          | E-GEOD-23518 |      |          | E-GEOD-17025 |      |          | E-GEOD-2109 |      |          |
|           |               |                |                                        |                           |                                  |                     |            | SMD                                 | Var  | P-value  | SMD         | Var  | P-value  | SMD          | Var  | P-value  | SMD      | Var  | P-value  | SMD      | Var  | P-value  | SMD          | Var  | P-value  | SMD          | Var  | P-value  | SMD         | Var  | P-value  |
| APOO      | No            | Yes            | No                                     | Down                      | 0.62                             | 0.000381            | 0.00904    | -0.93                               | 0.11 | 9.62E-03 | -0.67       | 0.04 | 2.57E-03 | -0.80        | 0.11 | 1.67E-02 | -0.30    | 0.11 | 4.07E-01 | -0.78    | 0.15 | 2.87E-02 | -0.84        | 0.22 | 4.93E-02 | -0.70        | 0.10 | 3.71E-02 | -0.48       | 0.03 | 8.46E-02 |
| NPAS3     | No            | Yes            | No                                     | Down                      | 0.62                             | 1.83E-19            | 0.0003     | -0.37                               | 0.10 | 9.35E-02 | -0.90       | 0.04 | 3.18E-06 | -0.49        | 0.10 | 2.49E-02 | -0.77    | 0.12 | 3.69E-03 | -1.09    | 0.15 | 1.98E-03 | -0.32        | 0.20 | 2.71E-01 | -0.82        | 0.10 | 5.65E-04 | -0.74       | 0.03 | 3.86E-06 |
| ZFYVE19   | No            | Yes            | No                                     | Down                      | 0.62                             | 0.003193            | 0.00286    | -0.19                               | 0.10 | 6.40E-01 | -0.73       | 0.04 | 1.46E-03 | -0.44        | 0.10 | 2.56E-01 | -1.14    | 0.13 | 2.10E-02 | -0.93    | 0.15 | 3.22E-02 | -0.78        | 0.22 | 7.38E-02 | -0.95        | 0.10 | 3.98E-02 | -0.34       | 0.03 | 2.04E-01 |
| ART3      | No            | Yes            | Yes                                    | Down                      | 0.62                             | 2.19E-05            | 1.5E-19    | -1.33                               | 0.12 | 2.89E-05 | -0.86       | 0.04 | 5.64E-04 | -0.82        | 0.11 | 5.77E-03 | -0.07    | 0.11 | 7.74E-01 | -0.72    | 0.14 | 4.61E-02 | -0.86        | 0.22 | 4.09E-02 | -0.81        | 0.10 | 2.50E-02 | -0.02       | 0.03 | 8.69E-01 |
| CLCN3     | No            | Yes            | No                                     | Down                      | 0.62                             | 0.003014            | 0.03619    | -1.21                               | 0.11 | 4.47E-03 | -0.19       | 0.04 | 3.65E-01 | -0.40        | 0.10 | 2.47E-01 | -1.49    | 0.14 | 7.86E-03 | -0.59    | 0.14 | 1.28E-01 | -0.67        | 0.21 | 1.04E-01 | -0.24        | 0.10 | 3.40E-01 | -0.70       | 0.03 | 5.78E-03 |
| DIO2      | No            | Yes            | Yes                                    | Down                      | 0.62                             | 3.58E-06            | 1.5E-19    | -0.94                               | 0.11 | 7.75E-04 | -0.62       | 0.04 | 1.47E-04 | -0.21        | 0.10 | 3.20E-01 | -0.80    | 0.12 | 5.66E-03 | -1.44    | 0.17 | 4.62E-04 | -1.05        | 0.23 | 1.34E-02 | -0.06        | 0.10 | 7.55E-01 | -0.38       | 0.03 | 1.46E-02 |
| SPINK4    | No            | Yes            | No                                     | Down                      | 0.62                             | 8.71E-05            | 1.5E-19    | -1.48                               | 0.12 | 3.18E-06 | -0.91       | 0.04 | 6.93E-05 | -0.32        | 0.10 | 3.68E-01 | -0.27    | 0.11 | 2.67E-01 | -1.05    | 0.15 | 1.68E-01 | -1.06        | 0.23 | 7.29E-02 | -0.24        | 0.10 | 5.15E-01 | -0.16       | 0.03 | 3.31E-01 |
| SH3BP1    | No            | No             | No                                     | Down                      | 0.62                             | 9.28E-05            | validated  | -0.48                               | 0.10 | 1.61E-01 | -0.87       | 0.04 | 1.63E-04 | -0.20        | 0.10 | 4.90E-01 | -0.67    | 0.12 | 6.76E-02 | -1.26    | 0.16 | 1.28E-02 | -0.38        | 0.20 | 3.19E-01 | -0.80        | 0.10 | 2.16E-02 | -0.82       | 0.03 | 6.29E-04 |
| C9ORF117  | No            | Yes            | No                                     | Down                      | 0.62                             | 1.83E-19            | 0.00063    | -0.81                               | 0.11 | 8.84E-03 | -0.69       | 0.04 | 4.77E-05 | -0.85        | 0.11 | 4.68E-03 | -1.27    | 0.13 | 5.38E-05 | -0.42    | 0.14 | 8.71E-02 | -0.50        | 0.21 | 2.89E-01 | -0.49        | 0.10 | 4.57E-02 | -0.44       | 0.03 | 6.26E-03 |
| CYB5D2    | No            | Yes            | No                                     | Down                      | 0.62                             | 5.41E-05            | 0.00911    | -0.54                               | 0.10 | 8.78E-02 | -1.01       | 0.04 | 6.41E-05 | -0.46        | 0.10 | 1.45E-01 | -1.07    | 0.13 | 2.03E-02 | -0.62    | 0.14 | 6.05E-02 | -0.25        | 0.20 | 3.35E-01 | -0.69        | 0.10 | 5.49E-02 | -0.82       | 0.03 | 1.06E-03 |
| TRIP4     | No            | No             | No                                     | Down                      | 0.62                             | 0.001779            | validated  | -0.18                               | 0.10 | 6.24E-01 | -0.92       | 0.04 | 9.08E-04 | -0.99        | 0.11 | 7.60E-03 | -0.74    | 0.12 | 1.74E-01 | -0.98    | 0.15 | 1.59E-02 | -0.51        | 0.21 | 2.03E-01 | -0.64        | 0.10 | 5.72E-02 | -0.52       | 0.03 | 1.65E-01 |
| MPND      | No            | Yes            | No                                     | Down                      | 0.62                             | 0.000159            | 1.5E-19    | -0.93                               | 0.11 | 2.72E-02 | -0.37       | 0.04 | 6.89E-02 | -0.77        | 0.11 | 3.07E-02 | -0.50    | 0.12 | 2.22E-01 | -0.28    | 0.14 | 5.46E-01 | -0.77        | 0.21 | 2.77E-01 | -0.81        | 0.10 | 1.19E-02 | -1.04       | 0.04 | 5.91E-06 |
| EGLN3     | No            | Yes            | No                                     | Down                      | 0.62                             | 1.83E-19            | 0.00015    | -1.16                               | 0.11 | 2.02E-04 | -0.91       | 0.04 | 3.41E-06 | -0.47        | 0.10 | 6.21E-02 | -0.02    | 0.11 | 9.34E-01 | -0.62    | 0.14 | 2.64E-01 | -1.29        | 0.24 | 1.20E-01 | -0.11        | 0.10 | 6.08E-01 | -0.87       | 0.03 | 7.27E-06 |
| PON2      | No            | No             | No                                     | Down                      | 0.62                             | 0.000143            | validated  | -0.76                               | 0.11 | 2.03E-02 | -0.26       | 0.04 | 1.56E-01 | -0.37        | 0.10 | 1.74E-01 | -0.77    | 0.12 | 1.25E-01 | -0.94    | 0.15 | 1.84E-03 | -1.84        | 0.28 | 2.00E-05 | -0.30        | 0.10 | 2.72E-01 | -0.22       | 0.03 | 1.62E-01 |
| KLK12     | No            | Yes            | No                                     | Down                      | 0.62                             | 1.83E-19            | 1.5E-19    | -1.73                               | 0.13 | 1.00E-20 | -0.69       | 0.04 | 4.75E-05 | -0.55        | 0.11 | 8.22E-02 | -0.73    | 0.12 | 3.26E-03 | -0.57    | 0.14 | 9.88E-02 | -0.81        | 0.22 | 1.31E-01 | -0.23        | 0.10 | 4.40E-01 | -0.15       | 0.03 | 3.03E-01 |
| TSNAXIP1  | No            | Yes            | No                                     | Down                      | 0.62                             | 6.26E-05            | 0.00044    | -0.86                               | 0.11 | 1.53E-03 | -0.47       | 0.04 | 5.19E-03 | -0.65        | 0.11 | 6.69E-02 | -0.97    | 0.13 | 4.61E-03 | -0.98    | 0.15 | 8.74E-02 | -0.17        | 0.20 | 8.06E-01 | -0.97        | 0.10 | 2.97E-03 | -0.41       | 0.03 | 4.71E-02 |
| SLCO2A1   | No            | Yes            | No                                     | Down                      | 0.62                             | 1.83E-19            | 3.8E-05    | -0.73                               | 0.11 | 3.79E-03 | -0.86       | 0.04 | 8.86E-06 | -0.61        | 0.11 | 2.04E-02 | -1.14    | 0.13 | 3.69E-04 | -0.15    | 0.14 | 3.79E-01 | -0.61        | 0.21 | 4.42E-02 | -0.63        | 0.10 | 1.33E-02 | -0.71       | 0.03 | 6.04E-04 |
| F3        | No            | No             | No                                     | Down                      | 0.62                             | 1.83E-19            | 0.0124     | -0.30                               | 0.10 | 2.12E-01 | -0.68       | 0.04 | 1.81E-04 | -0.59        | 0.11 | 1.63E-02 | -1.06    | 0.13 | 1.40E-03 | -0.31    | 0.14 | 2.32E-01 | -1.24        | 0.24 | 7.28E-03 | -0.47        | 0.10 | 4.68E-02 | -0.79       | 0.03 | 9.31E-06 |
| ZNF19     | No            | Yes            | No                                     | Down                      | 0.62                             | 0.026533            | 0.03034    | -0.13                               | 0.10 | 6.91E-01 | -0.49       | 0.04 | 9.97E-02 | -0.57        | 0.11 | 1.56E-01 | -1.71    | 0.15 | 6.34E-04 | -0.68    | 0.14 | 6.06E-01 | -0.62        | 0.21 | 6.17E-01 | -1.07        | 0.10 | 2.38E-02 | -0.18       | 0.03 | 2.94E-01 |
| AHCYL1    | No            | No             | No                                     | Down                      | 0.62                             | 0.000797            | validated  | -0.67                               | 0.11 | 8.50E-02 | -0.66       | 0.04 | 2.24E-03 | -0.23        | 0.10 | 4.54E-01 | -1.91    | 0.16 | 1.22E-03 | -0.50    | 0.14 | 5.48E-02 | -0.93        | 0.22 | 9.31E-03 | -0.44        | 0.10 | 1.21E-01 | -0.10       | 0.03 | 6.13E-01 |
| TPST2     | No            | Yes            | No                                     | Down                      | 0.62                             | 1.14E-05            | 0.00157    | -0.43                               | 0.10 | 1.16E-01 | -0.74       | 0.04 | 4.44E-04 | -0.25        | 0.10 | 3.69E-01 | -1.03    | 0.13 | 1.59E-02 | -0.61    | 0.14 | 2.46E-02 | -0.62        | 0.21 | 5.04E-02 | -1.20        | 0.10 | 1.19E-04 | -0.57       | 0.03 | 2.71E-02 |
| EFCAB6    | No            | No             | No                                     | Down                      | 0.62                             | 6.71E-06            | validated  | -0.43                               | 0.10 | 9.83E-02 | -0.58       | 0.04 | 1.72E-03 | -0.39        | 0.10 | 2.30E-01 | -0.92    | 0.12 | 2.26E-03 | -0.62    | 0.14 | 6.83E-02 | -0.87        | 0.22 | 1.88E-01 | -0.89        | 0.10 | 7.58E-03 | -0.74       | 0.03 | 1.48E-05 |
| NHS       | No            | Yes            | No                                     | Down                      | 0.62                             | 6.71E-06            | 0.00084    | -1.13                               | 0.11 | 2.66E-04 | -0.72       | 0.04 | 4.55E-04 | -0.97        | 0.11 | 2.60E-03 | -0.26    | 0.11 | 3.61E-01 | -0.62    | 0.14 | 8.38E-02 | -0.78        | 0.22 | 8.12E-02 | -0.35        | 0.10 | 1.48E-01 | -0.60       | 0.03 | 1.85E-03 |
| PIGN      | No            | No             | No                                     | Down                      | 0.62                             | 0.00066             | validated  | -0.93                               | 0.11 | 1.80E-02 | -0.35       | 0.04 | 1.21E-01 | -0.54        | 0.11 | 8.34E-02 | -0.95    | 0.12 | 2.17E-02 | -0.85    | 0.15 | 1.67E-02 | -0.41        | 0.20 | 2.55E-01 | -0.58        | 0.10 | 6.75E-02 | -0.84       | 0.03 | 2.12E-03 |
| DNAL4     | No            | No             | No                                     | Down                      | 0.62                             | 2.85E-05            | validated  | -0.58                               | 0.10 | 8.23E-02 | -0.73       | 0.04 | 9.49E-04 | -0.20        | 0.10 | 5.22E-01 | -0.22    | 0.11 | 6.24E-01 | -1.42    | 0.17 | 1.37E-04 | -0.72        | 0.21 | 3.05E-02 | -0.77        | 0.10 | 5.54E-02 | -0.79       | 0.03 | 1.08E-03 |
| PRKAB1    | No            | Yes            | No                                     | Down                      | 0.62                             | 0.000415            | 0.02874    | -0.15                               | 0.10 | 5.76E-01 | -0.67       | 0.04 | 2.23E-03 | -0.60        | 0.11 | 6.63E-02 | -0.66    | 0.12 | 9.12E-02 | -0.94    | 0.15 | 9.40E-03 | -1.46        | 0.25 | 1.43E-03 | -0.67        | 0.10 | 5.30E-02 | -0.28       | 0.03 | 1.62E-01 |
| REEP6     | No            | Yes            | No                                     | Down                      | 0.62                             | 1.14E-05            | 0.00028    | -1.41                               | 0.12 | 2.93E-05 | -0.71       | 0.04 | 1.69E-04 | -0.42        | 0.10 | 1.56E-01 | -1.07    | 0.13 | 2.94E-03 | -0.66    | 0.14 | 9.26E-02 | -0.32        | 0.20 | 3.93E-01 | -0.60        | 0.10 | 6.85E-02 | -0.24       | 0.03 | 1.23E-01 |
| IQUB      | No            | Yes            | No                                     | Down                      | 0.63                             | 5.41E-05            | 0.00024    | -0.67                               | 0.11 | 1.37E-02 | -0.79       | 0.04 | 2.17E-04 | -0.62        | 0.11 | 2.47E-02 | -0.89    | 0.12 | 3.76E-03 | -0.98    | 0.15 | 4.95E-02 | -0.49        | 0.21 | 4.38E-01 | -0.72        | 0.10 | 2.38E-02 | -0.27       | 0.03 | 1.25E-01 |
| ENOSF1    | No            | No             | No                                     | Down                      | 0.63                             | 0.00011             | 0.04583    | -0.71                               | 0.11 | 2.38E-02 | -0.48       | 0.04 | 1.32E-02 | -0.49        | 0.10 | 8.53E-02 | -1.58    | 0.15 | 2.24E-04 | -0.94    | 0.15 | 1.20E-02 | -0.32        | 0.20 | 3.69E-01 | -0.41        | 0.10 | 1.01E-01 | -0.48       | 0.03 | 2.79E-02 |
| GLB1      | No            | No             | No                                     | Down                      | 0.63                             | 3.97E-05            | validated  | -0.14                               | 0.10 | 6.39E-01 | -0.44       | 0.04 | 1.25E-02 | -0.54        | 0.11 | 1.07E-01 | -0.88    | 0.12 | 3.82E-02 | -0.93    | 0.15 | 2.02E-03 | -1.35        | 0.25 | 5.88E-04 | -0.21        | 0.10 | 4.03E-01 | -0.92       | 0.03 | 6.53E-04 |
| CCT6B     | No            | No             | No                                     | Down                      | 0.63                             | 0.002197            | validated  | -0.41                               | 0.10 | 1.38E-01 | -0.72       | 0.04 | 1.00E-03 | -0.47        | 0.11 | 3.64E-01 | -0.31    | 0.11 | 3.64E-01 | -1.30    | 0.16 | 6.29E-02 | -0.84        | 0.22 | 2.86E-01 | -0.62        | 0.10 | 3.97E-02 | -0.73       | 0.03 | 9.80E-03 |
| CCDC104   | No            | No             | No                                     | Down                      | 0.63                             | 0.000345            | validated  | -0.50                               | 0.10 | 1.30E-01 | -0.65       | 0.04 | 2.84E-03 | -0.43        | 0.10 | 2.14E-01 | -0.96    | 0.13 | 3.70E-02 | -0.61    | 0.14 | 6.83E-02 | -0.44        | 0.20 | 1.85E-01 | -1.08        | 0.10 | 2.33E-03 | -0.74       | 0.03 | 7.25E-03 |
| MRRP257   | No            | Yes            | No                                     | Down                      | 0.63                             | 0.001158            | 0.03341    | -1.20                               | 0.11 | 4.48E-03 | -0.52       | 0.04 | 2.07E-02 | -1.13        | 0.11 | 6.53E-03 | -0.61    | 0.12 | 1.78E-01 | -0.55    | 0.14 | 5.70E-02 | -0.22        | 0.20 | 3.78E-01 | -0.71        | 0.10 | 2.88E-02 | -0.45       | 0.03 | 1.45E-01 |
| VAMP8     | No            | No             | No                                     | Down                      | 0.63                             | 3.58E-06            | validated  | -0.08                               | 0.10 | 8.20E-01 | -0.60       | 0.04 | 2.71E-03 | -0.23        | 0.10 | 5.08E-01 | -0.52    | 0.12 | 1.67E-01 | -0.64    | 0.14 | 1.59E-02 | -1.29        | 0.24 | 6.49E-04 | -1.13        | 0.10 | 7.16E-05 | -0.91       | 0.03 | 1.80E-04 |
| THOC7     | No            | No             | No                                     | Down                      | 0.63                             | 0.001055            | validated  | -0.60                               | 0.10 | 1.99E-01 | -0.29       | 0.04 | 2.27E-01 | -0.38        | 0.10 | 3.32E-01 | -0.24    | 0.11 | 6.35E-01 | -1.16    | 0.16 | 7.30E-04 | -1.25        | 0.25 | 7.78E-04 | -0.62        | 0.10 | 3.44E-02 | -0.75       | 0.03 | 4.13E-02 |
| TFF1      | No            | Yes            | No                                     | Down                      | 0.63                             | 1.83E-19            | 1.5E-19    | -0.81                               | 0.11 | 1.37E-02 | -0.74       | 0.04 | 8.86E-06 | -0.66        | 0.11 | 7.75E-03 | -0.80    | 0.12 | 1.92E-03 | -0.49    | 0.14 | 2.31E-01 | -0.87        | 0.22 | 1.24E-01 | -0.48        | 0.10 | 5.45E-02 | -0.55       | 0.03 | 8.60E-04 |
| LEF1      | No            | Yes            | No                                     | Down                      | 0.63                             | 1.83E-19            | 1.5E-19    | -1.19                               | 0.11 | 4.13E-05 | -0.40       | 0.04 | 1.05E-02 | -0.70        | 0.11 | 7.30E-03 | -0.71    | 0.12 | 1.00E-02 | -0.99    | 0.15 | 1.32E-03 | -0.58        | 0.21 | 5.59E-02 | -0.73        | 0.10 | 3.93E-03 | -0.10       | 0.03 | 5.30E-01 |
| RAB11FIP1 | No            | Yes            | No                                     | Down                      | 0.63                             | 1.83E-19            | 0.00174    | -0.43                               | 0.10 | 1.13E-01 | -0.82       | 0.04 |          |              |      |          |          |      |          |          |      |          |              |      |          |              |      |          |             |      |          |

**Supplementary Table 2. Details for 2,053 genes differentially expressed between EEC and NEEC, identified by microarray meta-analysis.**  
 EEC - endometrioid endometrial cancer, NEEC - non-endometrioid endometrial cancer, SMD - Standardised Mean Difference, FDR - False Discovery Rate, Var - Variance

| Gene      | 145 gene list | 1253 gene list | Associated with EEC-specific survival? | Up/Down Regulated in NEEC | average standardised fold change | Microarray Meta FDR | RNAseq FDR | Individual microarray study results |      |          |             |      |          |              |      |          |          |      |          |       |          |          |       |      |              |       |      |              |       |      |             |  |  |
|-----------|---------------|----------------|----------------------------------------|---------------------------|----------------------------------|---------------------|------------|-------------------------------------|------|----------|-------------|------|----------|--------------|------|----------|----------|------|----------|-------|----------|----------|-------|------|--------------|-------|------|--------------|-------|------|-------------|--|--|
|           |               |                |                                        |                           |                                  |                     |            | TCGA                                |      |          | E-MTAB-2532 |      |          | E-GEOD-56026 |      |          | GSE32507 |      |          |       | GSE24537 |          |       |      | E-GEOD-23518 |       |      | E-GEOD-17025 |       |      | E-GEOD-2109 |  |  |
|           |               |                |                                        |                           |                                  |                     |            | SMD                                 | Var  | P-value  | SMD         | Var  | P-value  | SMD          | Var  | P-value  | SMD      | Var  | P-value  | SMD   | Var      | P-value  | SMD   | Var  | P-value      | SMD   | Var  | P-value      | SMD   | Var  | P-value     |  |  |
| ZMYND12   | No            | Yes            | No                                     | Down                      | 0.64                             | 1.14E-05            | 0.00112    | -0.47                               | 0.10 | 7.38E-02 | -0.64       | 0.04 | 1.04E-03 | -0.40        | 0.10 | 1.07E-01 | -0.73    | 0.12 | 1.87E-02 | -0.96 | 0.15     | 1.29E-02 | -0.32 | 0.20 | 3.67E-01     | -0.95 | 0.10 | 2.29E-03     | -0.76 | 0.03 | 9.18E-04    |  |  |
| EFHC1     | No            | No             | No                                     | Down                      | 0.64                             | 7.73E-05            | validated  | -0.22                               | 0.10 | 4.34E-01 | -0.46       | 0.04 | 8.55E-03 | -0.05        | 0.10 | 8.44E-01 | -1.13    | 0.13 | 7.98E-03 | -0.84 | 0.15     | 2.69E-02 | -0.75 | 0.21 | 1.71E-01     | -1.05 | 0.10 | 3.66E-04     | -0.72 | 0.03 | 7.34E-04    |  |  |
| S100A11   | No            | No             | No                                     | Down                      | 0.64                             | 1.14E-05            | 0.03543    | -0.16                               | 0.10 | 5.89E-01 | -0.57       | 0.04 | 2.52E-03 | -0.90        | 0.11 | 1.19E-02 | -0.51    | 0.12 | 1.48E-01 | -0.43 | 0.14     | 7.31E-02 | -1.20 | 0.24 | 1.23E-03     | -0.77 | 0.10 | 1.12E-02     | -0.70 | 0.03 | 6.15E-04    |  |  |
| PLEKHA1   | No            | No             | No                                     | Down                      | 0.64                             | 0.00017             | validated  | -0.35                               | 0.10 | 2.42E-01 | -0.62       | 0.04 | 2.27E-03 | -0.33        | 0.10 | 2.34E-01 | -1.40    | 0.14 | 1.37E-03 | -0.15 | 0.14     | 3.92E-01 | -1.06 | 0.23 | 5.24E-03     | -0.77 | 0.10 | 1.80E-02     | -0.55 | 0.03 | 2.53E-02    |  |  |
| PITRM1    | No            | No             | No                                     | Down                      | 0.64                             | 0.000405            | validated  | -0.86                               | 0.11 | 1.03E-02 | -0.51       | 0.04 | 9.56E-03 | -0.75        | 0.11 | 2.22E-02 | -0.90    | 0.12 | 4.59E-02 | -0.51 | 0.14     | 7.86E-02 | -0.61 | 0.21 | 7.07E-02     | -0.95 | 0.10 | 3.45E-03     | -0.13 | 0.03 | 4.46E-01    |  |  |
| TTC29     | No            | Yes            | No                                     | Down                      | 0.64                             | 3.58E-06            | 0.00037    | -0.79                               | 0.11 | 1.31E-03 | -0.62       | 0.04 | 4.28E-04 | -0.60        | 0.11 | 1.75E-02 | -0.33    | 0.11 | 2.05E-01 | -0.94 | 0.15     | 1.76E-02 | -0.69 | 0.21 | 1.77E-01     | -0.70 | 0.10 | 1.11E-02     | -0.53 | 0.03 | 3.51E-04    |  |  |
| KIAA0232  | No            | No             | No                                     | Down                      | 0.64                             | 0.014864            | validated  | -0.31                               | 0.10 | 4.17E-01 | -0.58       | 0.04 | 2.50E-02 | -0.71        | 0.11 | 3.03E-02 | -0.99    | 0.13 | 2.34E-02 | -0.92 | 0.15     | 1.41E-01 | -0.82 | 0.22 | 2.19E-01     | -0.50 | 0.10 | 9.31E-02     | -0.38 | 0.03 | 1.85E-01    |  |  |
| CRIP1     | No            | No             | No                                     | Down                      | 0.64                             | 1.83E-19            | validated  | -0.47                               | 0.10 | 6.43E-02 | -0.70       | 0.04 | 8.11E-05 | -0.03        | 0.10 | 8.70E-01 | -1.38    | 0.14 | 1.04E-04 | -0.40 | 0.14     | 7.94E-02 | -0.34 | 0.20 | 1.81E-01     | -0.96 | 0.10 | 8.72E-04     | -0.92 | 0.03 | 9.09E-07    |  |  |
| FBXL8     | No            | Yes            | No                                     | Down                      | 0.64                             | 0.017726            | 0.00014    | -1.01                               | 0.11 | 1.50E-03 | -0.27       | 0.04 | 2.31E-01 | -0.36        | 0.10 | 3.37E-01 | -0.03    | 0.13 | 2.04E-02 | -1.00 | 0.15     | 3.06E-01 | -0.65 | 0.21 | 3.85E-01     | -0.60 | 0.10 | 2.77E-01     | -0.28 | 0.03 | 7.96E-02    |  |  |
| ARHGGEF16 | No            | No             | No                                     | Down                      | 0.64                             | 0.000148            | validated  | -1.16                               | 0.11 | 2.53E-03 | -0.55       | 0.04 | 2.23E-03 | -0.39        | 0.10 | 3.05E-01 | -1.55    | 0.14 | 3.14E-05 | -0.73 | 0.15     | 2.34E-01 | -0.30 | 0.20 | 6.03E-01     | 0.00  | 0.10 | 9.96E-01     | -0.51 | 0.03 | 1.54E-02    |  |  |
| C10RF172  | No            | No             | No                                     | Down                      | 0.64                             | 3.58E-06            | validated  | -0.24                               | 0.10 | 5.79E-01 | -0.66       | 0.04 | 3.10E-04 | -0.28        | 0.10 | 3.84E-01 | -1.21    | 0.13 | 1.23E-04 | -0.91 | 0.15     | 3.19E-02 | -0.92 | 0.22 | 4.33E-02     | -0.03 | 0.10 | 9.26E-01     | -0.93 | 0.03 | 2.04E-06    |  |  |
| TMEM63A   | No            | Yes            | No                                     | Down                      | 0.64                             | 6.71E-06            | 0.00083    | -0.47                               | 0.10 | 1.19E-01 | -1.12       | 0.04 | 9.09E-07 | -0.32        | 0.10 | 2.16E-01 | -1.49    | 0.14 | 2.64E-04 | -0.26 | 0.14     | 2.60E-01 | -0.18 | 0.20 | 5.44E-01     | -0.80 | 0.10 | 6.84E-03     | -0.54 | 0.03 | 1.98E-02    |  |  |
| UGDH      | No            | No             | No                                     | Down                      | 0.64                             | 2.40E-05            | validated  | -0.66                               | 0.11 | 2.40E-02 | -0.66       | 0.04 | 7.25E-04 | -0.85        | 0.11 | 1.19E-02 | -0.41    | 0.12 | 1.72E-01 | -0.80 | 0.15     | 8.83E-03 | -0.62 | 0.21 | 6.53E-02     | -0.34 | 0.10 | 2.20E-01     | -0.83 | 0.03 | 7.17E-04    |  |  |
| GFM2      | No            | Yes            | No                                     | Down                      | 0.64                             | 0.001814            | 0.03136    | -0.55                               | 0.10 | 1.87E-01 | -0.63       | 0.04 | 3.33E-03 | -0.75        | 0.11 | 1.52E-02 | -0.52    | 0.12 | 2.40E-01 | -1.05 | 0.15     | 2.34E-02 | -0.66 | 0.20 | 4.57E-01     | -0.92 | 0.10 | 9.77E-03     | -0.40 | 0.03 | 1.01E-01    |  |  |
| APRT      | No            | No             | No                                     | Down                      | 0.64                             | 0.000781            | validated  | -0.63                               | 0.11 | 7.99E-02 | -0.63       | 0.04 | 8.76E-03 | -0.38        | 0.10 | 3.12E-01 | -1.46    | 0.14 | 4.56E-03 | -0.46 | 0.14     | 8.16E-02 | -0.15 | 0.20 | 4.52E-01     | -0.86 | 0.10 | 9.67E-03     | -0.59 | 0.03 | 1.03E-02    |  |  |
| NLRX1     | No            | Yes            | No                                     | Down                      | 0.64                             | 0.000752            | 0.01003    | -0.73                               | 0.11 | 4.23E-02 | -1.14       | 0.04 | 2.16E-05 | -0.47        | 0.10 | 1.75E-01 | -1.10    | 0.13 | 2.37E-02 | -0.81 | 0.15     | 3.64E-02 | -0.49 | 0.21 | 1.69E-01     | -0.20 | 0.10 | 5.68E-01     | -0.24 | 0.03 | 2.53E-01    |  |  |
| CS1       | No            | Yes            | No                                     | Down                      | 0.64                             | 1.83E-19            | 2E-05      | -0.75                               | 0.11 | 3.50E-03 | -0.42       | 0.04 | 5.05E-03 | -0.75        | 0.11 | 2.87E-03 | -0.95    | 0.12 | 7.01E-04 | -1.05 | 0.15     | 2.58E-03 | -0.46 | 0.21 | 8.90E-02     | -0.42 | 0.10 | 6.06E-02     | -0.36 | 0.03 | 4.75E-03    |  |  |
| SLC22A4   | No            | Yes            | No                                     | Down                      | 0.64                             | 8.12E-05            | 0.02185    | -0.78                               | 0.11 | 5.20E-03 | -0.86       | 0.04 | 5.88E-05 | -0.14        | 0.10 | 5.48E-01 | -0.47    | 0.12 | 1.24E-01 | -0.91 | 0.15     | 7.69E-02 | -0.82 | 0.22 | 2.03E-01     | -0.61 | 0.10 | 2.59E-02     | -0.55 | 0.03 | 4.15E-03    |  |  |
| WDR77     | No            | No             | No                                     | Down                      | 0.64                             | 0.001351            | validated  | -0.59                               | 0.10 | 7.77E-02 | -0.59       | 0.04 | 4.09E-03 | -0.24        | 0.10 | 4.13E-01 | -1.24    | 0.13 | 8.53E-03 | -1.01 | 0.15     | 7.84E-03 | -0.79 | 0.22 | 5.59E-02     | -0.45 | 0.10 | 1.02E-01     | -0.24 | 0.03 | 2.67E-01    |  |  |
| ANKRD35   | No            | Yes            | No                                     | Down                      | 0.64                             | 1.83E-19            | 1.5E-19    | -0.96                               | 0.11 | 6.69E-04 | -0.81       | 0.04 | 6.95E-06 | -0.74        | 0.11 | 1.24E-02 | -0.67    | 0.12 | 1.33E-02 | -0.03 | 0.14     | 8.20E-01 | -0.21 | 0.20 | 3.88E-01     | -0.94 | 0.10 | 5.11E-04     | -0.77 | 0.03 | 9.09E-05    |  |  |
| TP53I3    | No            | Yes            | No                                     | Down                      | 0.64                             | 1.41E-05            | 0.00862    | -0.66                               | 0.11 | 3.02E-02 | -0.59       | 0.04 | 2.33E-03 | -0.48        | 0.10 | 8.18E-02 | -1.44    | 0.12 | 1.90E-01 | -0.95 | 0.15     | 3.34E-03 | -0.08 | 0.20 | 6.34E-01     | -1.28 | 0.10 | 9.31E-05     | -0.61 | 0.03 | 9.54E-03    |  |  |
| RNF126    | No            | No             | No                                     | Down                      | 0.64                             | 0.013848            | validated  | -0.95                               | 0.11 | 3.69E-02 | -0.03       | 0.04 | 8.56E-01 | -0.56        | 0.11 | 9.00E-02 | -0.47    | 0.14 | 3.73E-03 | -0.72 | 0.14     | 8.04E-02 | -0.40 | 0.20 | 3.04E-01     | -0.54 | 0.10 | 1.65E-01     | -0.49 | 0.03 | 7.74E-02    |  |  |
| KIAA0141  | No            | No             | No                                     | Down                      | 0.64                             | 0.006294            | validated  | -1.15                               | 0.11 | 7.14E-03 | -0.51       | 0.04 | 2.97E-02 | -0.82        | 0.11 | 4.27E-02 | -1.24    | 0.13 | 1.86E-02 | -1.18 | 0.14     | 4.74E-01 | -0.65 | 0.21 | 1.34E-01     | -0.41 | 0.10 | 1.70E-01     | -0.17 | 0.03 | 2.57E-01    |  |  |
| PRRG2     | No            | No             | No                                     | Down                      | 0.64                             | 0.000621            | validated  | -0.27                               | 0.10 | 3.82E-01 | -0.55       | 0.04 | 1.27E-02 | -0.39        | 0.10 | 3.05E-01 | -0.16    | 0.11 | 5.48E-01 | -1.57 | 0.17     | 1.92E-04 | -1.29 | 0.24 | 6.83E-03     | -0.20 | 0.10 | 5.21E-01     | -0.60 | 0.03 | 3.80E-03    |  |  |
| PCSK9     | No            | Yes            | No                                     | Down                      | 0.64                             | 1.41E-05            | 6.4E-05    | -1.38                               | 0.12 | 1.59E-05 | -0.67       | 0.04 | 4.68E-05 | -0.72        | 0.11 | 1.37E-02 | -0.51    | 0.12 | 4.12E-02 | -0.48 | 0.14     | 4.03E-01 | -0.85 | 0.22 | 3.17E-01     | -0.21 | 0.10 | 4.46E-01     | -0.31 | 0.03 | 8.49E-02    |  |  |
| RASEF     | No            | No             | No                                     | Down                      | 0.64                             | 3.97E-05            | validated  | -0.66                               | 0.11 | 1.25E-02 | -0.47       | 0.04 | 4.34E-03 | -0.30        | 0.10 | 2.09E-01 | -1.42    | 0.14 | 4.27E-05 | -1.11 | 0.15     | 8.34E-03 | -0.61 | 0.21 | 1.04E-01     | -0.22 | 0.10 | 3.15E-01     | -0.33 | 0.03 | 7.25E-02    |  |  |
| NMRAL1    | No            | Yes            | No                                     | Down                      | 0.64                             | 0.000754            | 0.00525    | -0.76                               | 0.11 | 6.60E-02 | -0.55       | 0.04 | 2.76E-02 | -0.47        | 0.10 | 1.28E-01 | -0.28    | 0.11 | 5.09E-01 | -0.05 | 0.14     | 6.67E-01 | -0.83 | 0.22 | 1.99E-02     | -1.40 | 0.11 | 2.00E-04     | -0.77 | 0.03 | 1.10E-02    |  |  |
| C11ORF63  | No            | Yes            | No                                     | Down                      | 0.64                             | 0.000602            | 1.5E-19    | -0.73                               | 0.11 | 1.63E-02 | -0.56       | 0.04 | 2.83E-03 | -0.40        | 0.10 | 1.25E-01 | -0.87    | 0.12 | 4.06E-03 | -0.79 | 0.15     | 1.02E-01 | -0.67 | 0.21 | 2.72E-01     | -0.96 | 0.10 | 6.84E-03     | -0.12 | 0.03 | 4.29E-01    |  |  |
| SLC9A3R1  | No            | No             | No                                     | Down                      | 0.64                             | 1.83E-19            | validated  | -0.35                               | 0.10 | 2.12E-01 | -0.84       | 0.04 | 3.09E-05 | -0.76        | 0.11 | 1.36E-02 | -0.45    | 0.12 | 1.34E-01 | -0.81 | 0.15     | 4.54E-03 | -0.42 | 0.20 | 1.22E-01     | -0.61 | 0.10 | 2.65E-02     | -0.86 | 0.03 | 2.18E-05    |  |  |
| KIAA1737  | No            | No             | No                                     | Down                      | 0.64                             | 0.000125            | validated  | -0.36                               | 0.10 | 2.86E-01 | -0.51       | 0.04 | 2.15E-02 | -0.05        | 0.10 | 8.71E-01 | -0.08    | 0.11 | 8.10E-01 | -1.32 | 0.16     | 6.37E-04 | -0.95 | 0.22 | 2.33E-02     | -0.52 | 0.10 | 4.56E-02     | -1.46 | 0.04 | 3.00E-05    |  |  |
| SPAG4     | No            | Yes            | Yes                                    | Down                      | 0.64                             | 0.000405            | 2E-05      | -0.37                               | 0.10 | 1.65E-01 | -0.35       | 0.04 | 2.75E-02 | -0.20        | 0.10 | 3.98E-01 | -1.35    | 0.14 | 5.64E-04 | -0.87 | 0.15     | 4.11E-02 | -0.90 | 0.22 | 6.93E-02     | -0.60 | 0.10 | 3.15E-02     | -0.31 | 0.03 | 9.49E-03    |  |  |
| NXN12     | No            | Yes            | No                                     | Down                      | 0.64                             | 0.000385            | 0.01307    | -1.01                               | 0.11 | 8.35E-04 | -0.85       | 0.04 | 3.05E-04 | -0.61        | 0.11 | 1.17E-01 | -0.55    | 0.12 | 6.90E-02 | -1.01 | 0.15     | 1.96E-02 | -0.60 | 0.21 | 2.35E-01     | -0.17 | 0.10 | 7.61E-01     | -0.30 | 0.03 | 1.08E-01    |  |  |
| EDF1      | No            | No             | No                                     | Down                      | 0.64                             | 0.001349            | 0.00843    | -0.08                               | 0.10 | 8.32E-01 | -0.34       | 0.04 | 1.74E-01 | -0.63        | 0.11 | 1.20E-01 | -0.92    | 0.12 | 1.40E-01 | -0.57 | 0.14     | 2.64E-02 | -0.36 | 0.20 | 1.63E-01     | -1.56 | 0.11 | 2.25E-05     | -0.63 | 0.03 | 5.62E-02    |  |  |
| C10RF201  | No            | Yes            | No                                     | Down                      | 0.64                             | 0.001648            | 0.00058    | -1.21                               | 0.11 | 3.33E-03 | -0.73       | 0.04 | 4.09E-04 | -0.48        | 0.10 | 1.86E-01 | -1.41    | 0.14 | 1.86E-03 | -0.19 | 0.14     | 7.39E-01 | -0.51 | 0.21 | 5.13E-01     | -0.49 | 0.10 | 1.72E-01     | -0.06 | 0.03 | 6.58E-01    |  |  |
| THUMP1    | No            | No             | No                                     | Down                      | 0.64                             | 0.003959            | validated  | -1.14                               | 0.11 | 1.48E-02 | -0.24       | 0.04 | 1.72E-01 | -0.87        | 0.11 | 3.35E-02 | -0.79    | 0.12 | 5.73E-02 | -0.42 | 0.14     | 1.65E-01 | -0.13 | 0.20 | 6.38E-01     | -0.48 | 0.10 | 1.43E-01     | -1.01 | 0.04 | 2.13E-03    |  |  |
| BRP44     | No            | No             | No                                     | Down                      | 0.64                             | 2.64E-05            | validated  | -0.20                               | 0.10 | 4.84E-01 | -0.45       | 0.04 | 7.27E-03 | -1.42        | 0.12 | 6.84E-05 | -0.99    | 0.13 | 8.99E-03 | -0.33 | 0.14     | 1.47E-01 | -0.77 | 0.21 | 1.88E-02     | -0.08 | 0.10 | 7.37E-01     | -0.83 | 0.03 | 1.03E-03    |  |  |
| AK3       | No            | No             | No                                     | Down                      | 0.65                             | 0.000302            | validated  | -0.42                               | 0.10 | 2.10E-01 | -0.85       | 0.04 | 1.28E-03 | -0.02        | 0.10 | 4.95E-02 | -0.90    | 0.12 | 4.39E-02 | -0.17 | 0.14     | 3.49E-01 | -0.77 | 0.21 | 2.07E-02     | -1.35 | 0.11 | 1.80E-04     | -0.56 | 0.03 | 3.31E-02    |  |  |
| CSORF142  | No            | Yes            | No                                     | Down                      | 0.65                             | 0.000707            | 0.01695    | -0.22                               | 0.10 | 4.91E-01 | -0.23       | 0.04 | 1.93E-01 | -0.49        |      |          |          |      |          |       |          |          |       |      |              |       |      |              |       |      |             |  |  |

**Supplementary Table 2. Details for 2,053 genes differentially expressed between EEC and NEEC, identified by microarray meta-analysis.**  
 EEC - endometrioid endometrial cancer, NEEC - non-endometrioid endometrial cancer, SMD - Standardised Mean Difference, FDR - False Discovery Rate, Var - Variance

| Gene     | 145 gene list | 1253 gene list | Associated with EEC-specific survival? | Up/Down Regulated in NEEC | average standardised fold change | Microarray Meta FDR | RNAseq FDR | Individual microarray study results |      |          |             |      |          |              |      |          |          |      |          |          |      |          |              |      |          |              |      |          |             |      |          |
|----------|---------------|----------------|----------------------------------------|---------------------------|----------------------------------|---------------------|------------|-------------------------------------|------|----------|-------------|------|----------|--------------|------|----------|----------|------|----------|----------|------|----------|--------------|------|----------|--------------|------|----------|-------------|------|----------|
|          |               |                |                                        |                           |                                  |                     |            | TCGA                                |      |          | E-MTAB-2532 |      |          | E-GEOD-56026 |      |          | GSE32507 |      |          | GSE24537 |      |          | E-GEOD-23518 |      |          | E-GEOD-17025 |      |          | E-GEOD-2109 |      |          |
|          |               |                |                                        |                           |                                  |                     |            | SMD                                 | Var  | P-value  | SMD         | Var  | P-value  | SMD          | Var  | P-value  | SMD      | Var  | P-value  | SMD      | Var  | P-value  | SMD          | Var  | P-value  | SMD          | Var  | P-value  | SMD         | Var  | P-value  |
| YTHDC2   | No            | Yes            | No                                     | Down                      | 0.65                             | 0.001604            | 0.01491    | -0.90                               | 0.11 | 4.73E-03 | -0.32       | 0.04 | 1.04E-01 | -0.69        | 0.11 | 2.75E-02 | -0.84    | 0.12 | 3.59E-02 | -0.59    | 0.14 | 3.47E-01 | -0.34        | 0.20 | 5.74E-01 | -0.96        | 0.10 | 1.31E-03 | -0.29       | 0.03 | 1.50E-01 |
| TMEM30B  | No            | No             | No                                     | Down                      | 0.65                             | 8.89E-05            | validated  | -1.04                               | 0.11 | 2.32E-02 | -0.19       | 0.04 | 1.80E-01 | -0.35        | 0.10 | 1.55E-01 | -0.55    | 0.12 | 3.42E-02 | -1.23    | 0.16 | 4.38E-04 | -0.33        | 0.20 | 2.10E-01 | -0.56        | 0.10 | 2.19E-02 | -0.67       | 0.03 | 9.83E-04 |
| TCN1     | No            | No             | No                                     | Down                      | 0.65                             | 0.000248            | validated  | -0.54                               | 0.10 | 4.79E-02 | -0.64       | 0.04 | 1.55E-03 | -0.21        | 0.10 | 4.42E-01 | -0.46    | 0.12 | 1.55E-01 | -1.21    | 0.16 | 6.46E-04 | -0.85        | 0.22 | 2.47E-02 | -0.66        | 0.10 | 6.55E-02 | -0.35       | 0.03 | 6.58E-02 |
| WDR63    | No            | Yes            | No                                     | Down                      | 0.65                             | 6.71E-06            | 0.00705    | -0.57                               | 0.10 | 2.00E-02 | -0.71       | 0.04 | 5.00E-05 | -0.61        | 0.11 | 1.43E-02 | -0.91    | 0.12 | 2.10E-03 | -0.71    | 0.14 | 1.21E-01 | -0.28        | 0.20 | 6.82E-01 | -0.70        | 0.10 | 9.30E-03 | -0.41       | 0.03 | 5.42E-03 |
| UFM1     | No            | No             | No                                     | Down                      | 0.65                             | 0.000674            | validated  | -0.68                               | 0.11 | 6.36E-02 | -0.60       | 0.04 | 1.25E-02 | -0.03        | 0.10 | 9.04E-01 | -0.65    | 0.12 | 1.40E-01 | -1.08    | 0.15 | 3.04E-03 | -0.25        | 0.20 | 3.40E-01 | -1.16        | 0.10 | 4.44E-04 | -0.46       | 0.03 | 5.43E-02 |
| GMPR     | No            | Yes            | No                                     | Down                      | 0.65                             | 9.98E-05            | 0.00075    | -0.76                               | 0.11 | 5.59E-03 | -0.74       | 0.04 | 1.54E-04 | -0.50        | 0.10 | 5.70E-02 | -0.38    | 0.11 | 1.93E-01 | -0.73    | 0.14 | 3.45E-02 | -1.05        | 0.23 | 1.95E-02 | -0.55        | 0.10 | 3.48E-02 | -0.20       | 0.03 | 2.61E-01 |
| PAPSS1   | No            | Yes            | No                                     | Down                      | 0.65                             | 0.000125            | 0.00031    | -0.90                               | 0.11 | 5.74E-03 | -0.52       | 0.04 | 1.01E-02 | -0.69        | 0.11 | 2.81E-02 | -0.62    | 0.12 | 1.04E-01 | -0.09    | 0.14 | 5.33E-01 | -0.40        | 0.20 | 1.39E-01 | -0.97        | 0.10 | 1.65E-03 | -0.71       | 0.03 | 4.22E-03 |
| LIMS1    | No            | No             | No                                     | Down                      | 0.65                             | 0.000258            | validated  | -0.81                               | 0.11 | 1.21E-02 | -0.35       | 0.04 | 7.12E-02 | -0.31        | 0.10 | 2.37E-01 | -0.53    | 0.12 | 2.70E-01 | -1.06    | 0.15 | 1.12E-03 | -0.89        | 0.22 | 1.48E-02 | -0.11        | 0.10 | 5.79E-01 | -0.84       | 0.03 | 6.89E-04 |
| ELMO3    | No            | No             | No                                     | Down                      | 0.65                             | 0.000676            | validated  | -0.32                               | 0.10 | 2.33E-01 | -0.21       | 0.04 | 1.82E-01 | -0.22        | 0.10 | 4.28E-01 | -1.98    | 0.16 | 1.52E-05 | -0.76    | 0.15 | 8.23E-02 | -0.44        | 0.20 | 2.46E-01 | -0.32        | 0.10 | 2.99E-01 | -0.66       | 0.03 | 1.50E-03 |
| CIORF186 | No            | No             | No                                     | Down                      | 0.65                             | 1.83E-19            | validated  | -0.10                               | 0.10 | 6.29E-01 | -0.62       | 0.04 | 4.83E-05 | -0.61        | 0.11 | 1.50E-02 | -1.22    | 0.13 | 1.98E-05 | -0.63    | 0.14 | 2.03E-02 | -0.55        | 0.21 | 8.13E-02 | -0.57        | 0.10 | 1.53E-02 | -0.60       | 0.03 | 2.17E-04 |
| PFAH2    | No            | Yes            | No                                     | Down                      | 0.65                             | 0.004725            | 0.00354    | -0.38                               | 0.10 | 2.76E-01 | -0.65       | 0.04 | 3.55E-03 | -0.88        | 0.11 | 1.88E-02 | -0.08    | 0.11 | 8.26E-01 | -0.62    | 0.14 | 1.39E-01 | -1.04        | 0.23 | 4.71E-02 | -0.74        | 0.10 | 8.40E-02 | -0.51       | 0.03 | 2.88E-02 |
| OTUB2    | No            | Yes            | No                                     | Down                      | 0.65                             | 0.003189            | 0.00067    | -0.63                               | 0.11 | 5.00E-02 | -0.72       | 0.04 | 2.21E-03 | -0.17        | 0.10 | 5.44E-01 | -1.13    | 0.13 | 1.76E-03 | -0.86    | 0.15 | 5.81E-02 | -0.76        | 0.21 | 2.36E-01 | -0.57        | 0.10 | 8.51E-02 | -0.04       | 0.03 | 7.77E-01 |
| ANKA1    | No            | Yes            | No                                     | Down                      | 0.65                             | 1.83E-19            | 4.6E-06    | -0.75                               | 0.11 | 8.72E-03 | -0.89       | 0.04 | 5.45E-06 | -0.51        | 0.11 | 2.79E-02 | -0.33    | 0.11 | 2.48E-01 | -0.46    | 0.14 | 4.94E-02 | -0.84        | 0.22 | 1.03E-02 | -0.02        | 0.10 | 9.00E-01 | -1.08       | 0.04 | 1.00E-20 |
| LRR6     | No            | No             | No                                     | Down                      | 0.65                             | 0.000707            | validated  | -0.41                               | 0.10 | 9.79E-02 | -0.35       | 0.04 | 3.03E-02 | -0.40        | 0.10 | 1.27E-01 | -0.59    | 0.12 | 4.04E-02 | -1.08    | 0.15 | 1.95E-02 | -0.74        | 0.21 | 1.83E-01 | -0.88        | 0.10 | 1.96E-03 | -0.43       | 0.03 | 2.61E-02 |
| MS4A8B   | No            | No             | No                                     | Down                      | 0.66                             | 1.83E-19            | 0.01333    | -0.67                               | 0.11 | 4.58E-03 | -0.70       | 0.04 | 1.61E-05 | -0.51        | 0.10 | 2.85E-02 | -0.76    | 0.12 | 2.66E-03 | -0.60    | 0.14 | 2.51E-02 | -0.56        | 0.21 | 1.53E-01 | -0.39        | 0.10 | 7.82E-02 | -0.68       | 0.03 | 3.18E-06 |
| FHIT     | No            | Yes            | No                                     | Down                      | 0.66                             | 0.001962            | 0.02267    | -0.87                               | 0.11 | 1.70E-02 | -0.31       | 0.04 | 9.01E-02 | -0.54        | 0.11 | 1.12E-01 | -0.25    | 0.11 | 4.48E-01 | -1.10    | 0.15 | 9.85E-02 | -0.74        | 0.21 | 1.99E-01 | -0.92        | 0.10 | 1.14E-02 | -0.15       | 0.03 | 5.03E-01 |
| PKP3     | No            | No             | No                                     | Down                      | 0.66                             | 3.58E-06            | validated  | -0.46                               | 0.10 | 9.82E-02 | -0.82       | 0.04 | 5.91E-06 | -0.24        | 0.10 | 3.94E-01 | -1.25    | 0.13 | 8.45E-05 | -0.80    | 0.15 | 8.73E-02 | -0.39        | 0.20 | 3.09E-01 | -0.28        | 0.10 | 4.17E-01 | -0.64       | 0.03 | 3.61E-04 |
| SUCLG2   | No            | Yes            | No                                     | Down                      | 0.66                             | 0.002976            | 0.02471    | -0.42                               | 0.10 | 1.92E-01 | -0.77       | 0.04 | 4.84E-04 | -0.58        | 0.11 | 1.08E-01 | -0.72    | 0.12 | 1.67E-01 | -0.90    | 0.15 | 1.85E-02 | -1.29        | 0.24 | 8.30E-03 | -0.11        | 0.10 | 6.07E-01 | -0.09       | 0.03 | 5.08E-01 |
| ANKRA2   | No            | Yes            | No                                     | Down                      | 0.66                             | 0.0025              | 0.00563    | -0.95                               | 0.11 | 1.20E-02 | -0.61       | 0.04 | 3.52E-03 | -0.76        | 0.11 | 4.06E-02 | -0.72    | 0.12 | 9.67E-02 | -0.62    | 0.14 | 8.91E-02 | -0.44        | 0.20 | 2.41E-01 | -0.02        | 0.10 | 9.42E-01 | -0.75       | 0.03 | 1.55E-02 |
| FHL2     | No            | Yes            | No                                     | Down                      | 0.66                             | 1.14E-05            | 0.00564    | -0.27                               | 0.10 | 2.84E-01 | -0.74       | 0.04 | 1.44E-04 | -0.39        | 0.10 | 1.40E-01 | -0.19    | 0.11 | 4.65E-01 | -1.13    | 0.16 | 3.48E-04 | -1.14        | 0.23 | 1.58E-03 | -0.56        | 0.10 | 2.65E-02 | -0.45       | 0.03 | 1.85E-02 |
| MMP26    | No            | Yes            | No                                     | Down                      | 0.66                             | 1.83E-19            | 1.5E-19    | -0.98                               | 0.11 | 1.31E-04 | -0.70       | 0.04 | 1.45E-05 | -0.58        | 0.11 | 1.59E-02 | -1.15    | 0.13 | 3.95E-05 | -0.48    | 0.14 | 7.33E-02 | -0.49        | 0.21 | 1.28E-01 | -0.39        | 0.10 | 8.66E-02 | -0.08       | 0.03 | 5.55E-01 |
| STXBP2   | No            | Yes            | No                                     | Down                      | 0.66                             | 0.002079            | 0.00117    | -0.02                               | 0.10 | 9.54E-01 | -0.79       | 0.04 | 1.48E-03 | -0.56        | 0.11 | 1.71E-01 | -0.96    | 0.13 | 1.11E-02 | -0.97    | 0.15 | 6.29E-03 | -0.94        | 0.22 | 1.85E-02 | -0.49        | 0.10 | 2.14E-01 | -0.12       | 0.03 | 4.94E-01 |
| TGM3     | No            | Yes            | No                                     | Down                      | 0.66                             | 0.001123            | 0.00132    | -0.23                               | 0.10 | 3.82E-01 | -0.68       | 0.04 | 1.93E-03 | -0.76        | 0.11 | 2.09E-02 | -0.96    | 0.13 | 5.80E-03 | -0.37    | 0.14 | 1.22E-01 | -1.16        | 0.23 | 6.72E-02 | -0.41        | 0.10 | 1.88E-01 | -0.28       | 0.03 | 6.59E-02 |
| DHX3     | No            | No             | No                                     | Down                      | 0.66                             | 0.002764            | validated  | -0.39                               | 0.10 | 2.15E-01 | -0.77       | 0.04 | 1.90E-03 | -0.47        | 0.10 | 2.33E-01 | -0.60    | 0.12 | 1.38E-01 | -0.74    | 0.14 | 1.93E-02 | -0.64        | 0.21 | 7.44E-02 | -0.45        | 0.10 | 2.54E-01 | -0.78       | 0.03 | 1.39E-02 |
| UNC13B   | No            | Yes            | No                                     | Down                      | 0.66                             | 0.006512            | 0.00159    | -0.71                               | 0.11 | 5.46E-02 | -0.57       | 0.04 | 1.24E-02 | -0.07        | 0.10 | 8.26E-01 | -0.63    | 0.12 | 1.49E-01 | -0.29    | 0.14 | 4.74E-01 | -0.52        | 0.21 | 3.21E-01 | -1.35        | 0.11 | 1.21E-03 | -0.70       | 0.03 | 3.31E-02 |
| CLDN7    | No            | No             | No                                     | Down                      | 0.66                             | 3.58E-06            | validated  | -0.50                               | 0.10 | 1.16E-01 | -0.63       | 0.04 | 8.22E-04 | -0.30        | 0.10 | 2.38E-01 | -1.08    | 0.13 | 7.01E-04 | -0.91    | 0.15 | 2.36E-03 | -0.39        | 0.20 | 1.44E-01 | -0.29        | 0.10 | 2.71E-01 | -0.73       | 0.03 | 3.16E-05 |
| LCN2     | No            | No             | No                                     | Down                      | 0.66                             | 1.83E-19            | validated  | 0.00                                | 0.10 | 9.82E-01 | -0.61       | 0.04 | 1.81E-05 | -0.32        | 0.10 | 1.14E-01 | -1.47    | 0.14 | 7.27E-06 | -0.51    | 0.14 | 3.33E-02 | -0.95        | 0.22 | 4.50E-03 | -0.25        | 0.10 | 2.20E-01 | -0.71       | 0.03 | 2.04E-06 |
| ALDH6A1  | No            | Yes            | No                                     | Down                      | 0.66                             | 9.84E-05            | 0.00459    | -0.89                               | 0.11 | 4.52E-03 | -0.69       | 0.04 | 9.54E-04 | -0.57        | 0.11 | 4.56E-02 | -0.59    | 0.12 | 9.10E-02 | -0.96    | 0.15 | 2.54E-03 | -0.57        | 0.21 | 8.92E-02 | -0.23        | 0.10 | 3.07E-01 | -0.32       | 0.03 | 4.30E-02 |
| PPP2R2C  | No            | Yes            | No                                     | Down                      | 0.66                             | 1.83E-19            | 0.00548    | -0.88                               | 0.11 | 9.32E-04 | -0.95       | 0.04 | 1.36E-06 | -0.59        | 0.11 | 1.18E-02 | -0.55    | 0.12 | 2.45E-02 | -0.52    | 0.14 | 4.08E-02 | -0.88        | 0.22 | 1.57E-02 | -0.15        | 0.10 | 4.46E-01 | -0.30       | 0.03 | 5.09E-02 |
| PPP1R7   | No            | No             | No                                     | Down                      | 0.66                             | 0.0022              | 0.00744    | -0.28                               | 0.10 | 4.68E-01 | -0.74       | 0.04 | 4.02E-03 | -0.22        | 0.10 | 4.89E-01 | -0.01    | 0.11 | 9.84E-01 | -1.43    | 0.17 | 1.57E-03 | -1.06        | 0.23 | 2.29E-02 | -0.66        | 0.10 | 2.57E-02 | -0.42       | 0.03 | 4.52E-02 |
| TTTC21A  | No            | Yes            | No                                     | Down                      | 0.66                             | 0.000125            | 0.0003     | -0.70                               | 0.11 | 1.05E-02 | -0.51       | 0.04 | 2.60E-03 | -0.62        | 0.11 | 4.44E-02 | -0.84    | 0.12 | 1.56E-02 | -0.38    | 0.14 | 1.38E-01 | -0.49        | 0.21 | 4.10E-01 | -1.17        | 0.10 | 1.74E-04 | -0.10       | 0.03 | 5.21E-01 |
| DNAI1    | No            | Yes            | No                                     | Down                      | 0.66                             | 3.58E-06            | 0.00261    | -0.49                               | 0.10 | 7.89E-02 | -0.71       | 0.04 | 1.21E-04 | -0.51        | 0.11 | 6.20E-02 | -0.84    | 0.12 | 3.65E-03 | -0.60    | 0.14 | 4.03E-02 | -0.49        | 0.21 | 3.42E-01 | -0.58        | 0.10 | 2.29E-02 | -0.59       | 0.03 | 9.16E-05 |
| TRIM13   | No            | Yes            | No                                     | Down                      | 0.66                             | 0.000925            | 0.04471    | -0.84                               | 0.11 | 5.98E-02 | -0.62       | 0.04 | 4.14E-03 | -0.04        | 0.10 | 8.53E-01 | -0.57    | 0.12 | 7.50E-02 | -0.78    | 0.15 | 2.25E-02 | -0.57        | 0.21 | 1.33E-01 | -1.16        | 0.10 | 5.24E-04 | -0.22       | 0.03 | 1.27E-01 |
| TC2N     | No            | No             | No                                     | Down                      | 0.66                             | 2.40E-05            | validated  | -0.46                               | 0.10 | 1.04E-01 | -1.32       | 0.04 | 4.54E-07 | -0.29        | 0.10 | 2.63E-01 | -1.02    | 0.13 | 1.99E-03 | -0.33    | 0.14 | 3.59E-01 | -0.66        | 0.21 |          |              |      |          |             |      |          |

**Supplementary Table 2. Details for 2,053 genes differentially expressed between EEC and NEEC, identified by microarray meta-analysis.**  
 EEC - endometrioid endometrial cancer, NEEC - non-endometrioid endometrial cancer, SMD - Standardised Mean Difference, FDR - False Discovery Rate, Var - Variance

| Gene      | 145 gene list | 1253 gene list | Associated with EEC-specific survival? | Up/Down Regulated in NEEC | average standardised fold change | Microarray Meta FDR | RNAseq FDR | Individual microarray study results |      |          |             |      |          |              |      |          |          |      |          |       |          |          |       |      |              |       |      |              |       |      |             |  |  |
|-----------|---------------|----------------|----------------------------------------|---------------------------|----------------------------------|---------------------|------------|-------------------------------------|------|----------|-------------|------|----------|--------------|------|----------|----------|------|----------|-------|----------|----------|-------|------|--------------|-------|------|--------------|-------|------|-------------|--|--|
|           |               |                |                                        |                           |                                  |                     |            | TCGA                                |      |          | E-MTAB-2532 |      |          | E-GEOD-56026 |      |          | GSE32507 |      |          |       | GSE24537 |          |       |      | E-GEOD-23518 |       |      | E-GEOD-17025 |       |      | E-GEOD-2109 |  |  |
|           |               |                |                                        |                           |                                  |                     |            | SMD                                 | Var  | P-value  | SMD         | Var  | P-value  | SMD          | Var  | P-value  | SMD      | Var  | P-value  | SMD   | Var      | P-value  | SMD   | Var  | P-value      | SMD   | Var  | P-value      | SMD   | Var  | P-value     |  |  |
| DNAH5     | No            | No             | No                                     | Down                      | 0.67                             | 1.14E-05            | validated  | -0.11                               | 0.10 | 7.24E-01 | -0.79       | 0.04 | 1.02E-05 | -0.54        | 0.11 | 6.19E-02 | -1.07    | 0.13 | 3.43E-04 | -0.53 | 0.14     | 4.42E-01 | -0.40 | 0.20 | 6.43E-01     | -0.78 | 0.10 | 2.39E-03     | -0.47 | 0.03 | 1.24E-02    |  |  |
| SPAG8     | No            | Yes            | No                                     | Down                      | 0.67                             | 3.97E-05            | 0.00154    | -0.61                               | 0.10 | 1.39E-02 | -0.61       | 0.04 | 1.99E-04 | -0.43        | 0.10 | 1.37E-01 | -0.79    | 0.12 | 7.77E-03 | -0.90 | 0.15     | 9.31E-02 | -0.34 | 0.20 | 5.59E-01     | -0.50 | 0.10 | 4.99E-02     | -0.50 | 0.03 | 1.05E-03    |  |  |
| IL7       | No            | No             | No                                     | Down                      | 0.67                             | 0.000343            | validated  | -0.17                               | 0.10 | 4.76E-01 | -0.78       | 0.04 | 2.28E-04 | -0.54        | 0.11 | 3.23E-02 | -0.54    | 0.12 | 6.33E-02 | -0.32 | 0.14     | 4.36E-01 | -0.97 | 0.22 | 2.02E-01     | -0.81 | 0.10 | 1.42E-02     | -0.56 | 0.03 | 2.21E-03    |  |  |
| STEAP3    | No            | Yes            | No                                     | Down                      | 0.67                             | 0.000349            | 2E-05      | -0.73                               | 0.11 | 1.36E-02 | -0.75       | 0.04 | 4.93E-05 | -0.17        | 0.10 | 4.83E-01 | -0.62    | 0.12 | 4.87E-02 | -0.90 | 0.15     | 2.04E-02 | -0.92 | 0.22 | 4.05E-02     | -0.40 | 0.10 | 1.59E-01     | -0.16 | 0.03 | 3.10E-01    |  |  |
| CASP7     | No            | No             | No                                     | Down                      | 0.67                             | 0.00072             | validated  | -0.49                               | 0.10 | 1.07E-01 | -0.90       | 0.04 | 1.34E-04 | -0.46        | 0.10 | 1.33E-01 | -0.61    | 0.12 | 1.05E-01 | -0.11 | 0.14     | 5.67E-01 | -0.76 | 0.21 | 5.44E-02     | -0.77 | 0.10 | 1.36E-02     | -0.57 | 0.03 | 3.51E-02    |  |  |
| DNAH11    | No            | Yes            | No                                     | Down                      | 0.67                             | 0.000584            | 1.5E-19    | -0.87                               | 0.11 | 3.30E-03 | -0.71       | 0.04 | 6.45E-05 | -0.37        | 0.10 | 1.90E-01 | -0.32    | 0.11 | 1.77E-01 | -0.73 | 0.14     | 2.34E-01 | -0.67 | 0.21 | 5.44E-01     | -0.73 | 0.10 | 2.39E-02     | -0.25 | 0.03 | 7.98E-02    |  |  |
| ATF4      | No            | No             | No                                     | Down                      | 0.67                             | 0.0005154           | validated  | -0.06                               | 0.10 | 8.76E-01 | -0.51       | 0.04 | 6.15E-02 | -0.10        | 0.10 | 7.95E-01 | -1.27    | 0.13 | 2.11E-02 | -0.59 | 0.14     | 2.17E-02 | -0.15 | 0.20 | 4.32E-01     | -1.66 | 0.11 | 1.06E-04     | -0.31 | 0.03 | 3.24E-01    |  |  |
| IL19      | No            | Yes            | Yes                                    | Down                      | 0.67                             | 6.71E-06            | 1.5E-19    | -0.49                               | 0.10 | 3.39E-02 | -0.77       | 0.04 | 1.34E-05 | -0.79        | 0.11 | 4.94E-03 | -0.84    | 0.12 | 2.05E-03 | -0.38 | 0.14     | 1.18E-01 | -0.65 | 0.21 | 4.17E-02     | -0.46 | 0.10 | 7.45E-02     | -0.26 | 0.03 | 6.98E-02    |  |  |
| GTF3C5    | No            | Yes            | No                                     | Down                      | 0.67                             | 0.001724            | 0.02139    | -0.66                               | 0.11 | 6.01E-02 | -0.55       | 0.04 | 8.54E-03 | -0.34        | 0.10 | 2.94E-01 | -0.47    | 0.12 | 2.84E-01 | -0.48 | 0.14     | 8.29E-02 | -0.61 | 0.21 | 6.85E-02     | -1.01 | 0.10 | 8.72E-03     | -0.52 | 0.03 | 1.03E-02    |  |  |
| CHIA      | No            | No             | No                                     | Down                      | 0.67                             | 0.001095            | validated  | -0.51                               | 0.10 | 3.75E-02 | -0.51       | 0.04 | 1.62E-03 | -0.36        | 0.10 | 2.17E-01 | -1.18    | 0.13 | 1.62E-04 | -0.37 | 0.14     | 6.17E-01 | -1.03 | 0.23 | 3.49E-01     | -0.40 | 0.10 | 2.89E-01     | -0.30 | 0.03 | 6.38E-02    |  |  |
| UQCRRH    | No            | Yes            | No                                     | Down                      | 0.67                             | 6.71E-06            | 1.5E-19    | -0.09                               | 0.10 | 7.27E-01 | -0.41       | 0.04 | 1.29E-02 | -0.89        | 0.11 | 2.90E-03 | -0.13    | 0.11 | 6.01E-01 | -0.06 | 0.14     | 6.10E-01 | -0.49 | 0.21 | 8.15E-02     | -1.85 | 0.11 | 2.27E-07     | -0.73 | 0.03 | 1.16E-03    |  |  |
| SCAMP4    | No            | Yes            | No                                     | Down                      | 0.67                             | 0.008518            | 3.5E-05    | -0.82                               | 0.11 | 6.65E-02 | -0.27       | 0.04 | 1.05E-01 | -0.77        | 0.11 | 3.84E-02 | -1.31    | 0.14 | 4.91E-04 | -0.11 | 0.14     | 7.31E-01 | -0.49 | 0.21 | 3.58E-01     | -0.68 | 0.10 | 1.29E-01     | -0.21 | 0.03 | 2.17E-01    |  |  |
| ZNF18     | No            | Yes            | No                                     | Down                      | 0.67                             | 0.038925            | 0.0036     | -0.71                               | 0.11 | 5.09E-02 | -0.23       | 0.04 | 2.91E-01 | -0.45        | 0.10 | 2.45E-01 | -0.33    | 0.11 | 5.38E-01 | -0.47 | 0.14     | 2.21E-01 | -0.85 | 0.22 | 1.62E-01     | -1.07 | 0.10 | 1.06E-02     | -0.53 | 0.03 | 6.77E-02    |  |  |
| C14ORF166 | No            | No             | No                                     | Down                      | 0.67                             | 0.045805            | validated  | -1.02                               | 0.11 | 5.05E-02 | -0.17       | 0.04 | 4.80E-01 | -0.07        | 0.10 | 8.46E-01 | -0.62    | 0.12 | 3.36E-01 | -0.67 | 0.15     | 5.00E-03 | -1.11 | 0.23 | 1.94E-02     | -0.27 | 0.10 | 2.98E-01     | -0.31 | 0.03 | 3.97E-01    |  |  |
| ZNF282    | No            | No             | No                                     | Down                      | 0.67                             | 0.01678             | 0.00211    | -0.45                               | 0.10 | 2.92E-01 | -0.62       | 0.04 | 8.54E-03 | -0.36        | 0.10 | 3.34E-01 | -0.10    | 0.11 | 7.76E-01 | -0.64 | 0.14     | 6.65E-02 | -1.32 | 0.24 | 1.69E-02     | -0.74 | 0.10 | 5.22E-02     | -0.40 | 0.03 | 1.41E-01    |  |  |
| PDIA4     | No            | No             | No                                     | Down                      | 0.67                             | 0.004463            | validated  | -0.10                               | 0.10 | 7.53E-01 | -0.09       | 0.04 | 6.02E-01 | -0.65        | 0.11 | 4.93E-02 | -0.49    | 0.12 | 2.26E-01 | -0.97 | 0.15     | 9.79E-03 | -0.96 | 0.22 | 2.75E-02     | -1.00 | 0.10 | 1.66E-03     | -0.36 | 0.03 | 9.34E-02    |  |  |
| PIR       | No            | Yes            | No                                     | Down                      | 0.67                             | 2.40E-05            | 1.5E-19    | -0.92                               | 0.11 | 1.40E-03 | -0.65       | 0.04 | 4.38E-04 | -0.71        | 0.11 | 8.63E-03 | -0.55    | 0.12 | 5.85E-02 | -0.19 | 0.14     | 3.87E-01 | -0.61 | 0.21 | 9.57E-02     | -0.45 | 0.10 | 5.84E-02     | -0.53 | 0.03 | 5.08E-03    |  |  |
| FAM81B    | No            | Yes            | No                                     | Down                      | 0.67                             | 1.83E-19            | 0.00868    | -0.74                               | 0.11 | 1.80E-03 | -0.67       | 0.04 | 3.61E-05 | -0.48        | 0.11 | 2.75E-02 | -0.65    | 0.12 | 1.19E-02 | -0.22 | 0.14     | 7.91E-01 | -0.53 | 0.21 | 6.25E-01     | -0.66 | 0.10 | 3.73E-03     | -0.67 | 0.03 | 9.54E-06    |  |  |
| RORC      | No            | No             | No                                     | Down                      | 0.67                             | 9.09E-05            | validated  | -0.01                               | 0.10 | 9.82E-01 | -0.80       | 0.04 | 6.18E-05 | -0.54        | 0.11 | 4.04E-02 | -0.93    | 0.12 | 2.73E-03 | -0.51 | 0.14     | 1.43E-01 | -0.97 | 0.22 | 1.42E-01     | -0.42 | 0.10 | 1.08E-01     | -0.46 | 0.03 | 3.11E-03    |  |  |
| C4ORF19   | No            | Yes            | No                                     | Down                      | 0.67                             | 0.000173            | 0.03979    | -0.41                               | 0.10 | 1.01E-01 | -0.87       | 0.04 | 9.31E-06 | -0.01        | 0.10 | 9.70E-01 | -0.88    | 0.12 | 5.30E-03 | -0.50 | 0.14     | 1.53E-01 | -1.35 | 0.25 | 3.22E-02     | -0.22 | 0.10 | 3.29E-01     | -0.38 | 0.03 | 2.24E-02    |  |  |
| LRRC43    | No            | No             | No                                     | Down                      | 0.67                             | 0.000704            | validated  | -0.49                               | 0.10 | 5.07E-02 | -0.67       | 0.04 | 3.60E-04 | -0.62        | 0.11 | 4.43E-02 | -0.54    | 0.12 | 5.19E-02 | -0.68 | 0.14     | 1.37E-01 | -0.65 | 0.21 | 3.71E-01     | -0.64 | 0.10 | 3.33E-02     | -0.33 | 0.03 | 8.83E-02    |  |  |
| HLA-DMA   | No            | No             | No                                     | Down                      | 0.67                             | 6.71E-06            | validated  | -0.05                               | 0.10 | 8.44E-01 | -0.81       | 0.04 | 2.41E-05 | -0.93        | 0.11 | 1.34E-03 | -0.37    | 0.11 | 1.84E-01 | -0.22 | 0.14     | 2.53E-01 | -0.97 | 0.22 | 4.90E-03     | -0.56 | 0.10 | 2.40E-02     | -0.71 | 0.03 | 8.31E-04    |  |  |
| LGALS3    | No            | No             | No                                     | Down                      | 0.67                             | 0.00072             | validated  | -0.55                               | 0.10 | 5.06E-02 | -0.72       | 0.04 | 3.37E-04 | -0.70        | 0.11 | 2.71E-02 | -0.53    | 0.12 | 1.15E-01 | -0.69 | 0.14     | 6.81E-02 | -0.75 | 0.21 | 1.20E-01     | -0.27 | 0.10 | 2.24E-01     | -0.40 | 0.03 | 3.12E-02    |  |  |
| CDC65     | No            | No             | No                                     | Down                      | 0.67                             | 8.12E-05            | validated  | -0.62                               | 0.10 | 1.34E-02 | -0.70       | 0.04 | 3.35E-04 | -0.54        | 0.11 | 2.79E-02 | -0.66    | 0.12 | 2.51E-02 | -0.81 | 0.15     | 5.73E-02 | -0.21 | 0.20 | 6.45E-01     | -0.75 | 0.10 | 1.26E-02     | -0.32 | 0.03 | 2.48E-02    |  |  |
| ZSWIM6    | No            | Yes            | No                                     | Down                      | 0.67                             | 0.017941            | 0.04556    | -0.62                               | 0.10 | 1.10E-01 | -0.38       | 0.04 | 7.75E-02 | -0.39        | 0.10 | 2.62E-01 | -0.45    | 0.12 | 3.16E-01 | -0.48 | 0.14     | 1.07E-01 | -0.65 | 0.21 | 1.60E-01     | -0.94 | 0.10 | 1.19E-02     | -0.69 | 0.03 | 4.46E-02    |  |  |
| VAV3      | No            | No             | No                                     | Down                      | 0.67                             | 1.14E-05            | validated  | -0.35                               | 0.10 | 1.38E-01 | -0.48       | 0.04 | 2.68E-03 | -0.37        | 0.10 | 1.29E-01 | -0.62    | 0.12 | 2.56E-02 | -0.62 | 0.14     | 2.17E-02 | -0.79 | 0.22 | 1.73E-02     | -0.85 | 0.10 | 2.09E-03     | -0.50 | 0.03 | 1.29E-03    |  |  |
| ABC2      | No            | No             | No                                     | Down                      | 0.67                             | 0.047149            | validated  | -0.93                               | 0.11 | 5.70E-03 | -0.25       | 0.04 | 1.72E-01 | -0.91        | 0.11 | 7.22E-02 | -0.84    | 0.12 | 1.38E-02 | -0.50 | 0.14     | 5.85E-01 | -0.77 | 0.21 | 5.57E-01     | -0.32 | 0.10 | 4.53E-01     | -0.08 | 0.03 | 5.93E-01    |  |  |
| SLITRK6   | No            | Yes            | No                                     | Down                      | 0.67                             | 0.001462            | 1.5E-19    | -0.97                               | 0.11 | 9.47E-05 | -0.38       | 0.04 | 6.61E-03 | -0.39        | 0.10 | 7.52E-02 | -0.28    | 0.11 | 2.12E-01 | -0.78 | 0.15     | 5.69E-01 | -1.18 | 0.23 | 4.50E-01     | -0.26 | 0.10 | 2.00E-01     | -0.33 | 0.03 | 3.02E-02    |  |  |
| KIAA1407  | No            | No             | No                                     | Down                      | 0.67                             | 0.002404            | validated  | -0.66                               | 0.11 | 2.16E-02 | -0.39       | 0.04 | 1.66E-02 | -0.25        | 0.10 | 4.56E-01 | -0.46    | 0.12 | 1.32E-01 | -1.02 | 0.15     | 4.23E-02 | -0.56 | 0.21 | 3.35E-01     | -0.45 | 0.10 | 1.45E-01     | -0.78 | 0.03 | 1.06E-03    |  |  |
| CCDC114   | No            | No             | No                                     | Down                      | 0.67                             | 0.001029            | 0.0279     | -0.37                               | 0.10 | 3.76E-01 | -0.08       | 0.04 | 7.90E-01 | -0.48        | 0.10 | 9.39E-02 | -0.91    | 0.12 | 1.92E-02 | -0.68 | 0.14     | 1.67E-01 | -0.69 | 0.21 | 3.35E-01     | -0.76 | 0.10 | 2.12E-03     | -0.60 | 0.03 | 1.15E-04    |  |  |
| DTNB      | No            | Yes            | No                                     | Down                      | 0.67                             | 0.009523            | 0.00167    | -0.85                               | 0.11 | 2.85E-02 | -0.56       | 0.04 | 4.49E-03 | -0.29        | 0.10 | 4.46E-01 | -0.14    | 0.11 | 6.83E-01 | -0.33 | 0.14     | 3.28E-01 | -1.23 | 0.24 | 8.75E-02     | -0.75 | 0.10 | 1.02E-01     | -0.44 | 0.03 | 1.13E-02    |  |  |
| PLEKHG1   | No            | No             | No                                     | Down                      | 0.67                             | 0.000538            | validated  | -0.31                               | 0.10 | 2.44E-01 | -0.61       | 0.04 | 2.33E-03 | -0.25        | 0.10 | 3.38E-01 | -0.33    | 0.11 | 2.21E-01 | -0.84 | 0.15     | 2.83E-02 | -0.73 | 0.21 | 8.76E-02     | -0.86 | 0.10 | 2.53E-03     | -0.63 | 0.03 | 5.68E-03    |  |  |
| TMED7     | No            | No             | No                                     | Down                      | 0.67                             | 0.005864            | validated  | -0.76                               | 0.11 | 4.65E-02 | -0.33       | 0.04 | 1.48E-01 | -0.91        | 0.11 | 2.12E-02 | -0.45    | 0.12 | 3.24E-01 | -0.96 | 0.15     | 4.40E-03 | -0.28 | 0.20 | 3.19E-01     | -0.03 | 0.10 | 8.93E-01     | -0.85 | 0.03 | 6.70E-03    |  |  |
| SCNN1B    | No            | Yes            | No                                     | Down                      | 0.67                             | 1.83E-19            | 1.5E-19    | -0.55                               | 0.10 | 4.78E-02 | -0.97       | 0.04 | 5.91E-06 | -0.68        | 0.11 | 1.02E-02 | -0.56    | 0.11 | 8.27E-01 | -0.23 | 0.14     | 3.03E-01 | -0.50 | 0.21 | 1.22E-01     | -0.74 | 0.10 | 1.49E-02     | -0.85 | 0.03 | 1.14E-06    |  |  |
| FMOS      | No            | Yes            | No                                     | Down                      | 0.67                             | 0.000138            | 1.5E-19    | -0.80                               | 0.11 | 5.34E-03 | -0.77       | 0.04 | 2.20E-04 | -0.87        | 0.11 | 2.07E-03 | -0.62    | 0.12 | 4.94E-02 | -0.40 | 0.14     | 2.08E-01 | -0.69 | 0.21 | 1.48E-01     | -0.26 | 0.10 | 2.82E-01     | -0.25 | 0.03 | 1.02E-01    |  |  |
| GALNT6    | No            | No             | No                                     | Down                      | 0.67                             | 1.66E-05            | validated  | -0.16                               | 0.10 | 5.62E-01 | -0.56       | 0.04 | 1.50E-03 | -0.13        | 0.10 | 5.56E-01 | -1.45    | 0.14 | 5.11E-05 | -0.38 | 0.14     | 1.79E-01 | -0.50 | 0.21 | 1.37E-01     | -0.87 | 0.10 | 4.02E-03     | -0.52 | 0.03 | 9.98E-04    |  |  |
| ENTPD7    | No            | No             | No                                     | Down                      | 0.67                             | 0.006556            | validated  | -0.36                               | 0.10 | 2.04E-01 | -0.66       | 0.04 | 2.83E-03 | -1.15        | 0.11 | 3.55E-03 | -0.99    | 0.13 | 7.12E-03 | -0.32 | 0.14     | 3.91E-01 | -0.77 | 0.21 | 2.97E-01     | -0.23 | 0.10 | 4.32E-01     | -0.07 | 0.03 | 7.06E-01    |  |  |
| ADAMTS8   | No            | Yes            | No                                     | Down                      | 0.67                             | 1.83E-19            | 1.5E-19    | -0.75                               | 0.11 | 4.59E-03 | -0.80       | 0.04 | 2.18E-05 | -0.50        | 0.10 | 3.57E-02 | -0.30</  |      |          |       |          |          |       |      |              |       |      |              |       |      |             |  |  |

Supplementary Table 2. Details for 2,053 genes differentially expressed between EEC and NEEC, identified by microarray meta-analysis.  
 EEC - endometrioid endometrial cancer, NEEC - non-endometrioid endometrial cancer, SMD - Standardised Mean Difference, FDR - False Discovery Rate, Var - Variance

| Gene      | 145 gene list | 1253 gene list | Associated with EEC-specific survival? | Up/Down Regulated in NEEC | average standardised fold change | Microarray Meta FDR | RNAseq FDR | Individual microarray study results |      |          |             |      |          |              |      |          |          |      |          |          |      |          |              |      |          |              |      |          |             |      |          |
|-----------|---------------|----------------|----------------------------------------|---------------------------|----------------------------------|---------------------|------------|-------------------------------------|------|----------|-------------|------|----------|--------------|------|----------|----------|------|----------|----------|------|----------|--------------|------|----------|--------------|------|----------|-------------|------|----------|
|           |               |                |                                        |                           |                                  |                     |            | TCGA                                |      |          | E-MTAB-2532 |      |          | E-GEOD-56026 |      |          | GSE32507 |      |          | GSE24537 |      |          | E-GEOD-23518 |      |          | E-GEOD-17025 |      |          | E-GEOD-2109 |      |          |
|           |               |                |                                        |                           |                                  |                     |            | SMD                                 | Var  | P-value  | SMD         | Var  | P-value  | SMD          | Var  | P-value  | SMD      | Var  | P-value  | SMD      | Var  | P-value  | SMD          | Var  | P-value  | SMD          | Var  | P-value  | SMD         | Var  | P-value  |
| CD59      | No            | No             | No                                     | Down                      | 0.68                             | 0.000546            | 0.01249    | -0.35                               | 0.10 | 2.79E-01 | -0.63       | 0.04 | 1.08E-03 | -0.14        | 0.10 | 5.91E-01 | -0.36    | 0.11 | 2.73E-01 | -0.50    | 0.14 | 1.73E-01 | -0.89        | 0.22 | 7.39E-02 | -0.93        | 0.10 | 1.85E-03 | -0.60       | 0.03 | 1.36E-03 |
| ZBTB7A    | No            | Yes            | No                                     | Down                      | 0.68                             | 0.008616            | 0.00226    | -0.86                               | 0.11 | 9.00E-03 | -0.31       | 0.04 | 6.54E-02 | -0.75        | 0.11 | 5.38E-02 | -1.54    | 0.14 | 5.64E-04 | -0.32    | 0.14 | 6.96E-01 | -0.26        | 0.20 | 7.44E-01 | -0.16        | 0.10 | 5.04E-01 | -0.20       | 0.03 | 2.13E-01 |
| TLR3      | No            | No             | No                                     | Down                      | 0.68                             | 6.66E-05            | 0.02183    | -0.69                               | 0.11 | 9.02E-03 | -0.96       | 0.04 | 6.59E-06 | -0.67        | 0.11 | 1.01E-02 | -0.28    | 0.11 | 3.02E-01 | -0.34    | 0.14 | 3.68E-01 | -0.75        | 0.21 | 2.39E-01 | -0.19        | 0.10 | 4.00E-01 | -0.52       | 0.03 | 4.38E-03 |
| DNAJC17   | No            | Yes            | No                                     | Down                      | 0.68                             | 0.018482            | 0.00951    | -0.25                               | 0.10 | 4.75E-01 | -1.03       | 0.04 | 9.75E-04 | -0.39        | 0.10 | 3.06E-01 | -0.14    | 0.11 | 7.85E-01 | -0.35    | 0.14 | 2.58E-01 | -0.98        | 0.22 | 1.10E-01 | -0.77        | 0.10 | 6.50E-02 | -0.50       | 0.03 | 3.41E-02 |
| ORM1      | No            | Yes            | No                                     | Down                      | 0.68                             | 6.26E-05            | 1.5E-19    | -0.88                               | 0.11 | 9.55E-04 | -0.71       | 0.04 | 2.43E-05 | -0.55        | 0.11 | 2.44E-02 | -0.68    | 0.12 | 1.47E-02 | -0.26    | 0.14 | 2.50E-01 | -0.91        | 0.22 | 1.19E-01 | -0.35        | 0.10 | 1.56E-01 | -0.07       | 0.03 | 5.94E-01 |
| PPAPDC2   | No            | No             | No                                     | Down                      | 0.68                             | 0.004537            | validated  | -0.86                               | 0.11 | 1.32E-02 | -0.68       | 0.04 | 4.27E-03 | -0.05        | 0.10 | 8.65E-01 | -0.33    | 0.11 | 2.91E-01 | -0.91    | 0.15 | 7.35E-02 | -0.17        | 0.20 | 5.57E-01 | -0.63        | 0.10 | 3.03E-02 | -0.74       | 0.03 | 1.25E-02 |
| PZP       | No            | Yes            | Yes                                    | Down                      | 0.68                             | 0.000497            | 1.5E-19    | -0.46                               | 0.10 | 8.47E-02 | -0.83       | 0.04 | 3.61E-05 | -0.70        | 0.11 | 1.56E-02 | -0.42    | 0.12 | 1.01E-01 | -0.67    | 0.14 | 6.08E-02 | -0.58        | 0.21 | 4.75E-01 | -0.42        | 0.10 | 9.99E-02 | -0.28       | 0.03 | 8.82E-02 |
| STOML3    | No            | Yes            | No                                     | Down                      | 0.68                             | 0.001032            | 1.9E-05    | -0.52                               | 0.10 | 3.59E-02 | -0.72       | 0.04 | 2.55E-04 | -0.53        | 0.11 | 5.60E-02 | -0.33    | 0.11 | 1.94E-01 | -0.69    | 0.14 | 8.75E-02 | -0.55        | 0.21 | 4.84E-01 | -0.74        | 0.10 | 2.84E-02 | -0.30       | 0.03 | 6.18E-02 |
| DUSP10    | No            | Yes            | No                                     | Down                      | 0.68                             | 0.005005            | 0.04506    | -0.45                               | 0.10 | 1.37E-01 | -0.49       | 0.04 | 9.19E-03 | -0.74        | 0.11 | 1.70E-02 | -0.61    | 0.12 | 7.92E-02 | -0.57    | 0.14 | 1.16E-01 | -0.68        | 0.21 | 1.55E-01 | -0.56        | 0.10 | 4.05E-02 | -0.27       | 0.03 | 2.21E-01 |
| SMPD2     | No            | No             | No                                     | Down                      | 0.69                             | 0.00766             | validated  | -0.77                               | 0.11 | 2.43E-02 | -0.74       | 0.04 | 1.08E-03 | -0.46        | 0.10 | 2.00E-01 | -0.64    | 0.12 | 8.82E-02 | -0.52    | 0.14 | 2.10E-01 | -0.51        | 0.21 | 2.49E-01 | -0.51        | 0.10 | 1.28E-01 | -0.21       | 0.03 | 2.39E-01 |
| RBKS      | No            | No             | No                                     | Down                      | 0.69                             | 0.001899            | validated  | -0.32                               | 0.10 | 2.45E-01 | -0.79       | 0.04 | 2.36E-04 | -0.24        | 0.10 | 4.26E-01 | -0.60    | 0.12 | 1.23E-01 | -0.70    | 0.14 | 5.94E-02 | -0.79        | 0.22 | 9.91E-02 | -0.27        | 0.10 | 3.02E-01 | -0.65       | 0.03 | 4.94E-03 |
| SYN2BP    | No            | No             | No                                     | Down                      | 0.69                             | 0.010856            | validated  | -0.44                               | 0.10 | 2.24E-01 | -0.60       | 0.04 | 1.40E-02 | -0.08        | 0.10 | 7.67E-01 | -1.33    | 0.14 | 2.29E-02 | -0.35    | 0.14 | 1.44E-01 | -0.72        | 0.21 | 3.89E-02 | -0.39        | 0.10 | 1.53E-01 | -0.45       | 0.03 | 3.84E-02 |
| SPEF2     | No            | No             | No                                     | Down                      | 0.69                             | 2.85E-05            | validated  | -0.42                               | 0.10 | 1.08E-01 | -0.67       | 0.04 | 2.26E-04 | -0.45        | 0.10 | 6.49E-02 | -0.85    | 0.12 | 4.51E-03 | -0.43    | 0.14 | 3.88E-01 | -0.27        | 0.20 | 5.99E-01 | -0.77        | 0.10 | 2.17E-03 | -0.49       | 0.03 | 1.54E-03 |
| SSFA2     | No            | Yes            | No                                     | Down                      | 0.69                             | 0.000936            | 0.00037    | -0.65                               | 0.11 | 4.06E-02 | -0.81       | 0.04 | 3.91E-04 | -0.42        | 0.10 | 1.11E-01 | -1.20    | 0.13 | 1.43E-03 | -0.42    | 0.14 | 2.50E-01 | -0.33        | 0.20 | 4.38E-01 | -0.15        | 0.10 | 5.12E-01 | -0.37       | 0.03 | 4.12E-02 |
| C16ORF55  | No            | Yes            | No                                     | Down                      | 0.69                             | 0.000482            | 0.00504    | -0.99                               | 0.11 | 9.71E-03 | -0.56       | 0.04 | 4.26E-03 | -0.14        | 0.10 | 6.21E-01 | -0.51    | 0.12 | 1.02E-01 | -0.57    | 0.14 | 6.90E-01 | -0.33        | 0.20 | 7.43E-01 | -0.22        | 0.10 | 4.19E-01 | -1.03       | 0.04 | 2.04E-06 |
| RIPK2     | No            | No             | No                                     | Down                      | 0.69                             | 0.001465            | validated  | -0.39                               | 0.10 | 1.77E-01 | -0.64       | 0.04 | 1.51E-03 | -0.26        | 0.10 | 3.43E-01 | -0.91    | 0.12 | 2.14E-02 | -0.25    | 0.14 | 2.54E-01 | -1.03        | 0.23 | 6.93E-03 | -0.45        | 0.10 | 1.34E-01 | -0.42       | 0.03 | 3.50E-02 |
| ARRDC3    | No            | No             | No                                     | Down                      | 0.69                             | 0.003016            | validated  | -0.81                               | 0.11 | 2.10E-02 | -0.47       | 0.04 | 1.95E-02 | -0.08        | 0.10 | 7.97E-01 | -0.18    | 0.11 | 5.87E-01 | -0.91    | 0.15 | 6.84E-02 | -0.25        | 0.20 | 5.02E-01 | -0.97        | 0.10 | 1.54E-03 | -0.69       | 0.03 | 8.18E-03 |
| HSD1L     | No            | Yes            | No                                     | Down                      | 0.69                             | 0.012552            | 0.00015    | -0.58                               | 0.10 | 6.16E-02 | -0.55       | 0.04 | 1.16E-02 | -0.26        | 0.10 | 3.95E-01 | -0.22    | 0.11 | 5.16E-01 | -0.62    | 0.14 | 1.54E-01 | -0.60        | 0.21 | 2.08E-01 | -1.00        | 0.10 | 5.76E-03 | -0.53       | 0.03 | 9.62E-02 |
| TNFRSF14  | No            | No             | No                                     | Down                      | 0.69                             | 0.000225            | validated  | -0.73                               | 0.11 | 1.05E-02 | -0.83       | 0.04 | 4.73E-05 | -0.67        | 0.11 | 3.64E-02 | -0.78    | 0.12 | 2.08E-02 | -0.24    | 0.14 | 2.22E-01 | -0.49        | 0.21 | 1.03E-01 | -0.12        | 0.10 | 6.46E-01 | -0.47       | 0.03 | 5.23E-02 |
| TALDO1    | No            | No             | No                                     | Down                      | 0.69                             | 0.000527            | validated  | -0.44                               | 0.10 | 1.80E-01 | -0.81       | 0.04 | 3.11E-04 | -0.41        | 0.10 | 2.02E-01 | -0.24    | 0.11 | 4.96E-01 | -0.37    | 0.14 | 1.01E-01 | -0.76        | 0.21 | 1.97E-02 | -0.67        | 0.10 | 1.76E-02 | -0.64       | 0.03 | 7.38E-03 |
| RPL36     | No            | No             | No                                     | Down                      | 0.69                             | 0.011354            | 0.00277    | -0.60                               | 0.10 | 1.44E-01 | -0.34       | 0.04 | 1.40E-01 | -0.20        | 0.10 | 5.90E-01 | -0.71    | 0.12 | 1.73E-01 | -0.13    | 0.14 | 4.13E-01 | -0.93        | 0.22 | 5.73E-03 | -1.07        | 0.10 | 2.45E-03 | -0.35       | 0.03 | 1.70E-01 |
| SDSL      | No            | No             | No                                     | Down                      | 0.69                             | 0.001923            | validated  | -0.05                               | 0.10 | 8.63E-01 | -0.52       | 0.04 | 8.68E-03 | -0.74        | 0.11 | 2.06E-02 | -0.31    | 0.11 | 4.07E-01 | -0.99    | 0.15 | 7.99E-03 | -0.90        | 0.22 | 2.30E-02 | -0.39        | 0.10 | 1.56E-01 | -0.40       | 0.03 | 1.52E-02 |
| SND1      | No            | No             | No                                     | Down                      | 0.69                             | 0.03172             | 0.01377    | -1.08                               | 0.11 | 2.87E-02 | -0.63       | 0.04 | 1.27E-02 | -0.36        | 0.10 | 3.11E-01 | -0.63    | 0.12 | 2.33E-01 | -0.19    | 0.14 | 3.31E-01 | -0.37        | 0.20 | 1.93E-01 | -0.81        | 0.10 | 4.27E-02 | -0.23       | 0.03 | 3.97E-01 |
| OAZ1      | No            | No             | No                                     | Down                      | 0.69                             | 0.003047            | 0.00086    | -0.54                               | 0.10 | 1.83E-01 | -0.69       | 0.04 | 2.18E-02 | -0.49        | 0.10 | 1.70E-01 | -0.50    | 0.12 | 3.71E-01 | -0.21    | 0.14 | 2.49E-01 | -0.33        | 0.20 | 1.83E-01 | -1.09        | 0.10 | 7.54E-05 | -0.43       | 0.03 | 9.92E-02 |
| DNAH7     | No            | No             | No                                     | Down                      | 0.69                             | 0.001976            | validated  | -0.40                               | 0.10 | 1.32E-01 | -0.87       | 0.04 | 9.31E-06 | -0.26        | 0.10 | 3.05E-01 | -0.67    | 0.12 | 4.25E-02 | -0.85    | 0.15 | 1.63E-01 | -0.62        | 0.21 | 4.08E-01 | -0.45        | 0.10 | 8.21E-02 | -0.15       | 0.03 | 3.36E-01 |
| CFTR      | No            | No             | No                                     | Down                      | 0.69                             | 0.000432            | validated  | -0.47                               | 0.10 | 2.64E-02 | -0.40       | 0.04 | 3.19E-03 | -0.33        | 0.10 | 1.09E-01 | -0.53    | 0.12 | 2.53E-02 | -1.02    | 0.15 | 1.23E-02 | -0.99        | 0.22 | 4.31E-02 | -0.29        | 0.10 | 1.49E-01 | -0.24       | 0.03 | 5.35E-02 |
| MYRIP     | No            | Yes            | No                                     | Down                      | 0.69                             | 8.71E-05            | 0.01067    | -0.79                               | 0.11 | 2.50E-03 | -0.52       | 0.04 | 1.96E-03 | -0.54        | 0.11 | 2.57E-02 | -0.98    | 0.13 | 1.03E-03 | -0.21    | 0.14 | 4.19E-01 | -0.60        | 0.21 | 1.64E-01 | -0.22        | 0.10 | 3.28E-01 | -0.41       | 0.03 | 1.47E-02 |
| DEFB1     | No            | No             | No                                     | Down                      | 0.69                             | 1.83E-19            | validated  | -0.35                               | 0.10 | 9.38E-02 | -0.61       | 0.04 | 6.36E-05 | -0.44        | 0.10 | 4.36E-02 | -1.05    | 0.13 | 2.33E-04 | -0.18    | 0.14 | 2.96E-01 | -0.52        | 0.21 | 3.59E-02 | -0.34        | 0.10 | 9.60E-02 | -0.66       | 0.03 | 1.27E-05 |
| CEACAM5   | No            | Yes            | Yes                                    | Down                      | 0.69                             | 5.83E-05            | 3.1E-05    | -0.56                               | 0.10 | 2.97E-02 | -0.69       | 0.04 | 1.39E-04 | -0.88        | 0.11 | 6.84E-04 | -1.14    | 0.11 | 5.59E-01 | -0.53    | 0.14 | 8.68E-02 | -0.65        | 0.21 | 3.88E-01 | -0.56        | 0.10 | 2.00E-02 | -0.35       | 0.03 | 2.02E-02 |
| GTF3C6    | No            | No             | No                                     | Down                      | 0.69                             | 0.019714            | validated  | -0.66                               | 0.11 | 7.63E-02 | -0.38       | 0.04 | 6.81E-02 | -1.23        | 0.12 | 7.88E-03 | -0.25    | 0.11 | 5.59E-01 | -0.59    | 0.14 | 5.64E-02 | -0.71        | 0.21 | 5.08E-02 | -0.02        | 0.10 | 9.49E-01 | -0.42       | 0.03 | 1.33E-01 |
| TNFRSF10A | No            | Yes            | No                                     | Down                      | 0.69                             | 0.002479            | 5.6E-05    | -0.37                               | 0.10 | 2.20E-01 | -0.74       | 0.04 | 7.63E-04 | -0.41        | 0.10 | 1.94E-01 | -0.90    | 0.12 | 6.55E-03 | -0.45    | 0.14 | 1.81E-01 | -0.87        | 0.22 | 5.05E-02 | -0.14        | 0.10 | 5.80E-01 | -0.38       | 0.03 | 4.51E-02 |
| ADRA2A    | No            | Yes            | Yes                                    | Down                      | 0.69                             | 9.89E-06            | 1.5E-19    | -1.23                               | 0.12 | 2.07E-05 | -0.68       | 0.04 | 9.00E-05 | -0.19        | 0.10 | 3.75E-01 | -0.28    | 0.11 | 2.43E-01 | -0.33    | 0.14 | 2.45E-01 | -0.45        | 0.21 | 1.84E-01 | -0.57        | 0.10 | 1.79E-02 | -0.52       | 0.03 | 1.98E-03 |
| CTNNA2    | No            | No             | No                                     | Down                      | 0.69                             | 7.73E-05            | 0.00486    | -0.47                               | 0.10 | 3.48E-02 | -0.49       | 0.04 | 1.69E-03 | -0.70        | 0.11 | 3.79E-03 | -0.13    | 0.11 | 5.70E-01 | -0.95    | 0.15 | 2.22E-02 | -0.42        | 0.20 | 3.22E-02 | -0.62        | 0.10 | 1.07E-02 | -0.47       | 0.03 | 3.33E-03 |
| LRR3C6    | No            | Yes            | Yes                                    | Down                      | 0.69                             | 0.000556            | 1.5E-19    | -0.73                               | 0.11 | 8.47E-03 | -0.65       | 0.04 | 3.04E-04 | -0.22        | 0.10 | 5.20E-01 | -1.02    | 0.13 | 1.41E-03 | -0.55    | 0.14 | 5.39E-01 | -0.26        | 0.20 | 7.79E-01 | -0.41        | 0.10 | 1.60E-01 | -0.43       | 0.03 | 1.27E-02 |
| POLR1D    | No            | No             | No                                     | Down                      | 0.69                             | 0.007556            | validated  | -0.74                               | 0.11 | 6.93E-02 | -0.19       | 0.04 | 2.93E-01 | -0.30        | 0.10 | 3.33E-01 | -0.61    | 0.12 | 1.04E-01 | -0.82    | 0.15 | 2.21E-03 | -0.45        | 0.21 | 1.02E-01 | -0.59        | 0.10 | 5.12E-02 | -0.53       | 0.03 | 4.69E-02 |
| CDC47     | No            | Yes            | No                                     | Down                      | 0.69                             | 0.000528            | 0.0061     | -0.75                               | 0.11 | 8.18E-03 | -0.42       | 0.04 | 1.14E-02 | -0.08        | 0.10 | 7.44E-01 | -0.09    | 0.11 | 7.40E-01 | -0.94    | 0.15 | 2.10E-03 | -1.17        | 0.23 | 2.21E-03 | -0.68        | 0.10 | 1.08E-02 | -0.10       | 0.03 | 5.67E-01 |
| PKP2      | No            | No             | No                                     | Down                      | 0.69                             | 0.003664            | validated  | -0.30                               | 0.10 | 2.93E-01 | -0.19       | 0.04 | 2.39E-01 | -0.27        | 0.10 | 2.73E-01 | -0.55    | 0.12 | 1.07E-01 | -1.23    | 0.16 | 1.77E-03 | -1.18        | 0.23 | 9.30E-03 | -0.03        | 0.10 | 8.84E-01 | -0.49       | 0.03 | 4.35E-03 |
| AMFR      | No            | No             | No                                     | Down                      | 0.69                             | 0.000362            | 0.0486     | -0.77                               | 0.11 | 1.63E-02 | -0.54       | 0.04 | 2.56E-03 | -1.23        | 0.12 | 7        |          |      |          |          |      |          |              |      |          |              |      |          |             |      |          |

**Supplementary Table 2. Details for 2,053 genes differentially expressed between EEC and NEEC, identified by microarray meta-analysis.**  
 EEC - endometrioid endometrial cancer, NEEC - non-endometrioid endometrial cancer, SMD - Standardised Mean Difference, FDR - False Discovery Rate, Var - Variance

| Gene     | 145 gene list | 1253 gene list | Associated with EEC-specific survival? | Up/Down Regulated in NEEC | average standardised fold change | Microarray Meta FDR | RNAseq FDR | Individual microarray study results |      |          |             |      |          |              |      |          |          |      |          |          |      |          |              |      |          |              |      |          |             |      |          |
|----------|---------------|----------------|----------------------------------------|---------------------------|----------------------------------|---------------------|------------|-------------------------------------|------|----------|-------------|------|----------|--------------|------|----------|----------|------|----------|----------|------|----------|--------------|------|----------|--------------|------|----------|-------------|------|----------|
|          |               |                |                                        |                           |                                  |                     |            | TCGA                                |      |          | E-MTAB-2532 |      |          | E-GEOD-56026 |      |          | GSE32507 |      |          | GSE24537 |      |          | E-GEOD-23518 |      |          | E-GEOD-17025 |      |          | E-GEOD-2109 |      |          |
|          |               |                |                                        |                           |                                  |                     |            | SMD                                 | Var  | P-value  | SMD         | Var  | P-value  | SMD          | Var  | P-value  | SMD      | Var  | P-value  | SMD      | Var  | P-value  | SMD          | Var  | P-value  | SMD          | Var  | P-value  | SMD         | Var  | P-value  |
| CCDC53   | No            | Yes            | No                                     | Down                      | 0.70                             | 0.014014            | 0.04104    | -0.95                               | 0.11 | 1.45E-02 | -0.42       | 0.04 | 7.79E-02 | -0.52        | 0.11 | 1.23E-01 | -0.16    | 0.11 | 6.91E-01 | -0.30    | 0.14 | 2.03E-01 | -1.05        | 0.23 | 6.75E-03 | -0.13        | 0.10 | 6.35E-01 | -0.55       | 0.03 | 4.09E-02 |
| ATXN7L1  | No            | Yes            | No                                     | Down                      | 0.70                             | 0.007501            | 0.0002     | -0.24                               | 0.10 | 5.55E-01 | -0.50       | 0.04 | 1.18E-02 | -1.32        | 0.12 | 1.87E-03 | -0.74    | 0.12 | 5.48E-02 | -0.34    | 0.14 | 7.80E-01 | -0.10        | 0.20 | 9.41E-01 | -0.41        | 0.10 | 1.55E-01 | -0.42       | 0.03 | 9.34E-03 |
| FGF3     | No            | Yes            | No                                     | Down                      | 0.70                             | 0.003909            | 0.00133    | -0.85                               | 0.11 | 2.44E-03 | -0.10       | 0.04 | 5.72E-01 | -0.25        | 0.10 | 2.89E-01 | -1.01    | 0.13 | 1.56E-02 | -0.56    | 0.14 | 1.43E-01 | -0.54        | 0.21 | 8.99E-02 | -0.46        | 0.10 | 5.44E-02 | -0.30       | 0.03 | 3.49E-02 |
| TAX1BP1  | No            | No             | No                                     | Down                      | 0.70                             | 0.005033            | validated  | -0.75                               | 0.11 | 3.45E-02 | -0.23       | 0.04 | 2.83E-01 | -0.68        | 0.11 | 5.24E-02 | -0.23    | 0.11 | 6.55E-01 | -0.64    | 0.14 | 2.25E-02 | -0.25        | 0.20 | 3.02E-01 | -0.27        | 0.10 | 2.65E-01 | -1.01       | 0.04 | 4.59E-04 |
| RNF135   | No            | Yes            | No                                     | Down                      | 0.70                             | 0.010474            | 0.02336    | -0.58                               | 0.10 | 1.00E-01 | -0.44       | 0.04 | 5.51E-02 | -0.03        | 0.10 | 9.05E-01 | -0.07    | 0.11 | 8.68E-01 | -0.04    | 0.14 | 8.27E-01 | -0.85        | 0.22 | 5.83E-02 | -0.67        | 0.10 | 4.98E-02 | -1.38       | 0.04 | 1.57E-04 |
| RPL22L1  | No            | Yes            | No                                     | Down                      | 0.70                             | 0.007038            | 0.00347    | -0.66                               | 0.11 | 2.33E-02 | -0.53       | 0.04 | 5.03E-03 | -0.47        | 0.10 | 8.51E-02 | -0.43    | 0.12 | 1.80E-01 | -0.77    | 0.15 | 1.47E-01 | -0.48        | 0.21 | 3.05E-01 | -0.27        | 0.10 | 2.77E-01 | -0.45       | 0.03 | 2.70E-02 |
| KLRB1    | No            | Yes            | No                                     | Down                      | 0.70                             | 0.000167            | 0.00144    | -0.53                               | 0.10 | 3.78E-02 | -0.83       | 0.04 | 2.70E-05 | -0.74        | 0.11 | 1.40E-02 | -0.53    | 0.12 | 7.36E-02 | -0.20    | 0.14 | 4.22E-01 | -0.50        | 0.21 | 2.55E-01 | -0.21        | 0.10 | 4.82E-01 | -0.52       | 0.03 | 2.80E-03 |
| PITPNC1  | No            | Yes            | No                                     | Down                      | 0.70                             | 0.000639            | 0.00028    | -0.70                               | 0.11 | 1.41E-02 | -0.59       | 0.04 | 2.23E-03 | -0.93        | 0.11 | 2.61E-03 | -0.02    | 0.11 | 9.50E-01 | -0.21    | 0.14 | 3.49E-01 | -0.52        | 0.21 | 1.17E-01 | -1.05        | 0.10 | 8.09E-04 | -0.02       | 0.03 | 8.80E-01 |
| ZDHHC6   | No            | No             | No                                     | Down                      | 0.70                             | 0.041742            | validated  | -0.07                               | 0.10 | 8.53E-01 | -0.57       | 0.04 | 2.34E-02 | -0.43        | 0.10 | 2.48E-01 | -1.34    | 0.14 | 3.18E-02 | -0.77    | 0.15 | 1.33E-02 | -0.30        | 0.20 | 2.72E-01 | -0.06        | 0.10 | 8.42E-01 | -0.51       | 0.03 | 1.26E-01 |
| IFT88    | No            | Yes            | No                                     | Down                      | 0.70                             | 0.024645            | 0.01373    | -0.48                               | 0.10 | 1.12E-01 | -0.46       | 0.04 | 3.03E-02 | -0.26        | 0.10 | 4.08E-01 | -0.47    | 0.12 | 2.68E-01 | -0.49    | 0.14 | 2.11E-01 | -0.46        | 0.21 | 3.14E-01 | -0.78        | 0.10 | 2.04E-02 | -0.65       | 0.03 | 2.91E-02 |
| DLEC1    | No            | Yes            | No                                     | Down                      | 0.70                             | 1.14E-05            | 0.00046    | -0.34                               | 0.10 | 1.70E-01 | -0.61       | 0.04 | 1.44E-04 | -0.37        | 0.10 | 2.15E-01 | -0.73    | 0.12 | 6.03E-03 | -0.43    | 0.14 | 1.30E-01 | -0.27        | 0.20 | 6.07E-01 | -0.60        | 0.10 | 3.68E-02 | -0.69       | 0.03 | 2.02E-05 |
| PLXNB1   | No            | No             | No                                     | Down                      | 0.71                             | 0.016015            | validated  | -0.09                               | 0.10 | 7.43E-01 | -0.22       | 0.04 | 1.88E-01 | -0.06        | 0.10 | 8.64E-01 | -1.24    | 0.13 | 2.85E-03 | -0.30    | 0.14 | 1.69E-01 | -1.57        | 0.26 | 1.54E-03 | -0.55        | 0.10 | 6.06E-02 | -0.02       | 0.03 | 8.87E-01 |
| SUMF1    | No            | No             | No                                     | Down                      | 0.71                             | 0.005051            | validated  | -0.05                               | 0.10 | 8.54E-01 | -0.42       | 0.04 | 3.74E-02 | -0.15        | 0.10 | 6.30E-01 | -0.83    | 0.12 | 4.44E-02 | -0.92    | 0.15 | 5.12E-03 | -0.79        | 0.22 | 2.61E-02 | -0.02        | 0.10 | 9.48E-01 | -0.85       | 0.03 | 2.48E-03 |
| SAAA4    | No            | No             | No                                     | Down                      | 0.71                             | 0.001049            | validated  | -0.34                               | 0.10 | 1.34E-01 | -0.69       | 0.04 | 8.66E-05 | -0.41        | 0.10 | 1.11E-01 | -0.57    | 0.12 | 2.18E-02 | -0.53    | 0.14 | 1.21E-01 | -0.96        | 0.22 | 4.18E-02 | -0.38        | 0.10 | 1.36E-01 | -0.15       | 0.03 | 3.92E-01 |
| TOM1     | No            | Yes            | No                                     | Down                      | 0.71                             | 0.014097            | 0.00015    | -0.32                               | 0.10 | 3.31E-01 | -0.69       | 0.04 | 5.74E-03 | -0.35        | 0.10 | 3.13E-01 | -0.21    | 0.11 | 5.89E-01 | -0.68    | 0.14 | 2.02E-02 | -0.58        | 0.21 | 1.01E-01 | -0.74        | 0.10 | 6.56E-02 | -0.45       | 0.03 | 7.31E-02 |
| TCF7     | No            | Yes            | No                                     | Down                      | 0.71                             | 0.0264              | 7.8E-05    | -0.83                               | 0.11 | 3.27E-03 | -0.46       | 0.04 | 8.91E-03 | -0.11        | 0.10 | 7.00E-01 | -0.20    | 0.11 | 5.01E-01 | -1.19    | 0.16 | 4.06E-01 | -0.41        | 0.20 | 5.84E-01 | -0.54        | 0.10 | 8.21E-02 | -0.29       | 0.03 | 8.80E-02 |
| CXCL3    | No            | Yes            | No                                     | Down                      | 0.71                             | 6.66E-05            | 0.00014    | -0.93                               | 0.11 | 7.26E-04 | -0.61       | 0.04 | 3.05E-04 | -0.64        | 0.11 | 8.49E-03 | -0.76    | 0.12 | 5.04E-03 | -0.13    | 0.14 | 7.07E-01 | -0.34        | 0.20 | 4.63E-01 | -0.29        | 0.10 | 1.97E-01 | -0.32       | 0.03 | 4.41E-02 |
| PTER     | No            | No             | No                                     | Down                      | 0.71                             | 0.018215            | validated  | -0.39                               | 0.10 | 1.56E-01 | -0.16       | 0.04 | 3.84E-01 | -0.58        | 0.11 | 3.80E-02 | -0.91    | 0.12 | 1.50E-02 | -0.39    | 0.14 | 3.06E-01 | -0.94        | 0.22 | 1.16E-01 | -0.05        | 0.10 | 8.36E-01 | -0.59       | 0.03 | 6.63E-03 |
| SLC27A5  | No            | Yes            | No                                     | Down                      | 0.71                             | 0.013872            | 0.02162    | -1.22                               | 0.12 | 1.18E-03 | -0.44       | 0.04 | 1.35E-02 | -0.25        | 0.10 | 4.61E-01 | -0.51    | 0.12 | 1.54E-01 | -0.57    | 0.14 | 2.54E-01 | -0.32        | 0.20 | 3.71E-01 | -0.52        | 0.10 | 1.28E-01 | -0.18       | 0.03 | 2.45E-01 |
| GNPAT    | No            | Yes            | No                                     | Down                      | 0.71                             | 0.021683            | 0.04162    | -0.59                               | 0.10 | 9.86E-02 | -0.65       | 0.04 | 7.33E-03 | -0.31        | 0.10 | 3.94E-01 | -0.23    | 0.11 | 5.92E-01 | -0.30    | 0.14 | 2.17E-01 | -0.66        | 0.21 | 5.15E-02 | -1.08        | 0.10 | 1.07E-02 | -0.18       | 0.03 | 5.17E-01 |
| TPH1     | No            | Yes            | No                                     | Down                      | 0.71                             | 0.013492            | 0.0356     | -0.67                               | 0.11 | 1.79E-02 | -0.38       | 0.04 | 1.63E-01 | -0.61        | 0.11 | 7.26E-03 | -0.49    | 0.12 | 1.26E-01 | -1.10    | 0.15 | 3.50E-01 | -0.10        | 0.20 | 9.39E-01 | -0.45        | 0.10 | 4.01E-02 | -0.22       | 0.03 | 8.77E-02 |
| MFS04    | No            | Yes            | No                                     | Down                      | 0.71                             | 0.000754            | 0.03187    | -0.07                               | 0.10 | 8.09E-01 | -0.87       | 0.04 | 1.48E-05 | -0.70        | 0.11 | 7.13E-03 | -0.22    | 0.11 | 3.79E-01 | -0.71    | 0.14 | 4.50E-01 | -0.84        | 0.22 | 5.94E-01 | -0.01        | 0.10 | 9.55E-01 | -0.58       | 0.03 | 4.08E-04 |
| MAP2K2   | No            | Yes            | No                                     | Down                      | 0.71                             | 0.047732            | 0.01135    | -1.13                               | 0.11 | 1.81E-02 | -0.42       | 0.04 | 9.97E-02 | -0.23        | 0.10 | 4.70E-01 | -0.47    | 0.12 | 3.22E-01 | -0.01    | 0.14 | 9.42E-01 | -0.21        | 0.20 | 3.54E-01 | -1.23        | 0.10 | 8.18E-03 | -0.31       | 0.03 | 1.19E-01 |
| USP3     | No            | No             | No                                     | Down                      | 0.71                             | 0.016324            | validated  | -0.28                               | 0.10 | 3.86E-01 | -0.61       | 0.04 | 7.24E-03 | -0.92        | 0.11 | 1.99E-02 | -0.06    | 0.11 | 8.84E-01 | -0.70    | 0.14 | 3.44E-02 | -0.40        | 0.20 | 2.09E-01 | -0.66        | 0.10 | 6.40E-02 | -0.36       | 0.03 | 2.21E-01 |
| IL18R1   | No            | Yes            | No                                     | Down                      | 0.71                             | 0.012343            | 0.00409    | -0.43                               | 0.10 | 1.52E-01 | -0.68       | 0.04 | 1.40E-03 | -0.37        | 0.10 | 1.67E-01 | -0.42    | 0.12 | 1.83E-01 | -0.62    | 0.14 | 2.27E-01 | -0.61        | 0.21 | 2.65E-01 | -0.74        | 0.10 | 1.51E-02 | -0.13       | 0.03 | 4.22E-01 |
| CYB5D1   | No            | Yes            | No                                     | Down                      | 0.71                             | 0.007095            | 0.00163    | -0.27                               | 0.10 | 3.80E-01 | -0.31       | 0.04 | 2.05E-01 | -0.77        | 0.11 | 2.12E-02 | -0.08    | 0.11 | 8.25E-01 | -0.70    | 0.14 | 3.34E-02 | -0.32        | 0.20 | 2.88E-01 | -0.69        | 0.10 | 2.32E-02 | -0.85       | 0.03 | 2.03E-03 |
| ALAD     | No            | Yes            | No                                     | Down                      | 0.71                             | 0.033949            | 0.00149    | -0.48                               | 0.10 | 2.04E-01 | -0.46       | 0.04 | 1.69E-02 | -0.58        | 0.11 | 9.22E-02 | -0.28    | 0.11 | 4.40E-01 | -0.45    | 0.14 | 1.48E-01 | -1.23        | 0.24 | 1.06E-02 | -0.43        | 0.10 | 2.22E-01 | -0.08       | 0.03 | 7.09E-01 |
| GADD45G  | No            | Yes            | No                                     | Down                      | 0.71                             | 0.002726            | 6.4E-05    | -0.80                               | 0.11 | 1.13E-02 | -0.55       | 0.04 | 2.63E-03 | -0.47        | 0.10 | 1.12E-01 | -0.09    | 0.11 | 7.57E-01 | -0.42    | 0.14 | 1.28E-01 | -0.70        | 0.21 | 6.31E-02 | -0.59        | 0.10 | 4.56E-02 | -0.36       | 0.03 | 6.93E-02 |
| SSR3     | No            | No             | No                                     | Down                      | 0.71                             | 0.030443            | validated  | -0.41                               | 0.10 | 2.81E-01 | -0.34       | 0.04 | 7.61E-02 | -0.54        | 0.11 | 8.03E-02 | -1.13    | 0.11 | 7.39E-01 | -1.16    | 0.16 | 1.51E-01 | -0.08        | 0.20 | 8.82E-01 | -0.82        | 0.10 | 4.46E-03 | -0.51       | 0.03 | 3.41E-02 |
| EROL1    | No            | No             | No                                     | Down                      | 0.71                             | 0.001923            | validated  | -0.64                               | 0.11 | 2.35E-02 | -0.33       | 0.04 | 3.37E-02 | -0.15        | 0.10 | 5.05E-01 | -0.38    | 0.11 | 2.02E-01 | -1.08    | 0.14 | 6.97E-02 | -1.21        | 0.24 | 2.42E-03 | -0.71        | 0.10 | 1.72E-01 | -0.48       | 0.03 | 1.17E-02 |
| ANXA3    | No            | No             | No                                     | Down                      | 0.71                             | 0.00559             | validated  | -0.06                               | 0.10 | 8.04E-01 | -0.69       | 0.04 | 1.83E-04 | -0.03        | 0.10 | 8.91E-01 | -0.32    | 0.11 | 2.25E-01 | -1.09    | 0.15 | 9.88E-02 | -0.27        | 0.20 | 6.10E-01 | -0.75        | 0.10 | 6.43E-03 | -0.75       | 0.03 | 1.41E-04 |
| PGRMC2   | No            | No             | No                                     | Down                      | 0.71                             | 0.005905            | validated  | -0.13                               | 0.10 | 7.00E-01 | -0.34       | 0.04 | 7.31E-02 | -0.61        | 0.11 | 8.43E-02 | -0.42    | 0.12 | 3.66E-01 | -0.31    | 0.14 | 1.66E-01 | -0.89        | 0.22 | 1.02E-02 | -0.37        | 0.10 | 1.74E-01 | -0.89       | 0.03 | 8.60E-04 |
| HOXB6    | No            | No             | No                                     | Down                      | 0.71                             | 0.000613            | validated  | -0.09                               | 0.10 | 6.42E-01 | -0.24       | 0.04 | 8.02E-02 | -0.50        | 0.10 | 2.65E-02 | -0.75    | 0.12 | 4.86E-03 | -0.72    | 0.14 | 2.37E-02 | -0.78        | 0.22 | 3.52E-02 | -0.56        | 0.10 | 1.49E-02 | -0.32       | 0.03 | 2.47E-02 |
| TMEM190  | No            | No             | No                                     | Down                      | 0.71                             | 0.002352            | validated  | -0.32                               | 0.10 | 1.22E-01 | -0.40       | 0.04 | 4.31E-03 | -0.56        | 0.11 | 4.80E-02 | -0.54    | 0.12 | 4.21E-02 | -0.66    | 0.14 | 3.90E-02 | -0.85        | 0.22 | 1.25E-01 | -0.41        | 0.10 | 7.48E-02 | -0.21       | 0.03 | 1.14E-01 |
| SPLL2B   | No            | Yes            | No                                     | Down                      | 0.71                             | 0.010774            | 0.0001     | -0.87                               | 0.11 | 6.35E-03 | -0.04       | 0.04 | 7.76E-01 | -0.82        | 0.11 | 2.57E-02 | -0.89    | 0.12 | 1.96E-02 | -0.37    | 0.14 | 3.36E-01 | -0.35        | 0.20 | 5.32E-01 | -0.15        | 0.10 | 5.93E-01 | -0.47       | 0.03 | 6.72E-03 |
| DLX6     | No            | Yes            | No                                     | Down                      | 0.71                             | 0.003175            | 2E-05      | -0.57                               | 0.10 | 2.04E-02 | -0.41       | 0.04 | 2.62E-02 | -0.14        | 0.10 | 5.09E-01 | -0.51    | 0.12 | 6.16E-02 | -0.20    | 0.14 | 6.04E-01 | -0.95        | 0.22 | 3.27E-01 | -0.91        | 0.10 | 6.25E-04 | -0.28       | 0.03 | 4.56E-02 |
| ATP6V1G1 | No            | No             | No                                     | Down                      | 0.71                             | 0.006351            | validated  | -0.09                               | 0.10 | 8.20E-01 | -0.44       | 0.04 | 4.69E-02 | -0.28        | 0.10 | 4.31E-01 | -0.16    | 0.11 | 6.87E-01 | -1.46    | 0.17 | 6.52E-05 | -1.16        | 0.23 | 2.06E-03 | -0.13        | 0.10 | 6.60E-01 | -0.23       | 0.03 | 4.75E-01 |
| SPRYD3   | No            | Yes            | No                                     | Down                      | 0.71                             | 0.023702            | 0.01494    | -0.24                               | 0.10 | 5.25E-01 | -0.82       | 0.04 | 1.42E-0  |              |      |          |          |      |          |          |      |          |              |      |          |              |      |          |             |      |          |



Supplementary Table 2. Details for 2,053 genes differentially expressed between EEC and NEEC, identified by microarray meta-analysis.  
 EEC - endometrioid endometrial cancer, NEEC - non-endometrioid endometrial cancer, SMD - Standardised Mean Difference, FDR - False Discovery Rate, Var - Variance

| Gene     | 145 gene list | 1253 gene list | Associated with EEC-specific survival? | Up/Down Regulated in NEEC | average standardised fold change | Microarray Meta FDR | RNAseq FDR | Individual microarray study results |      |          |             |      |          |              |      |          |          |      |          |          |      |          |              |      |          |              |      |          |             |      |          |
|----------|---------------|----------------|----------------------------------------|---------------------------|----------------------------------|---------------------|------------|-------------------------------------|------|----------|-------------|------|----------|--------------|------|----------|----------|------|----------|----------|------|----------|--------------|------|----------|--------------|------|----------|-------------|------|----------|
|          |               |                |                                        |                           |                                  |                     |            | TCGA                                |      |          | E-MTAB-2532 |      |          | E-GEOD-56026 |      |          | GSE32507 |      |          | GSE24537 |      |          | E-GEOD-23518 |      |          | E-GEOD-17025 |      |          | E-GEOD-2109 |      |          |
|          |               |                |                                        |                           |                                  |                     |            | SMD                                 | Var  | P-value  | SMD         | Var  | P-value  | SMD          | Var  | P-value  | SMD      | Var  | P-value  | SMD      | Var  | P-value  | SMD          | Var  | P-value  | SMD          | Var  | P-value  | SMD         | Var  | P-value  |
| AP3B1    | No            | No             | No                                     | Down                      | 0.72                             | 0.030683            | validated  | -0.37                               | 0.10 | 3.50E-01 | -0.46       | 0.04 | 4.19E-02 | -0.71        | 0.11 | 5.53E-02 | -0.11    | 0.11 | 7.92E-01 | -0.52    | 0.14 | 5.65E-02 | -0.88        | 0.22 | 1.75E-02 | -0.44        | 0.10 | 1.38E-01 | -0.30       | 0.03 | 2.99E-01 |
| HYDIN    | No            | No             | No                                     | Down                      | 0.72                             | 0.017495            | validated  | -0.27                               | 0.10 | 3.64E-01 | -0.23       | 0.04 | 9.38E-02 | -0.37        | 0.10 | 1.49E-01 | -0.74    | 0.12 | 6.22E-03 | -1.00    | 0.15 | 3.87E-02 | -0.54        | 0.21 | 3.13E-01 | -0.47        | 0.10 | 6.29E-02 | -0.15       | 0.03 | 2.48E-01 |
| HAGH     | No            | No             | No                                     | Down                      | 0.72                             | 0.043013            | validated  | -0.26                               | 0.10 | 4.83E-01 | -0.26       | 0.04 | 1.79E-01 | -0.50        | 0.10 | 1.85E-01 | -0.23    | 0.11 | 6.83E-01 | -0.25    | 0.14 | 2.86E-01 | -0.57        | 0.21 | 9.11E-02 | -0.98        | 0.10 | 1.48E-02 | -0.71       | 0.03 | 1.55E-02 |
| ADAMT56  | No            | Yes            | No                                     | Down                      | 0.72                             | 0.001976            | 0.00123    | -0.49                               | 0.10 | 5.88E-02 | -0.43       | 0.04 | 8.42E-03 | -0.81        | 0.11 | 2.63E-03 | -0.47    | 0.12 | 7.22E-02 | -0.59    | 0.14 | 9.36E-02 | -0.42        | 0.20 | 2.68E-01 | -0.28        | 0.10 | 1.66E-01 | -0.27       | 0.03 | 7.48E-02 |
| CMTM6    | No            | No             | No                                     | Down                      | 0.72                             | 0.005626            | validated  | -0.70                               | 0.11 | 2.54E-02 | -0.55       | 0.04 | 4.78E-03 | -0.52        | 0.11 | 1.20E-01 | -0.35    | 0.11 | 2.49E-01 | -0.46    | 0.14 | 5.78E-02 | -0.82        | 0.22 | 1.39E-02 | -0.33        | 0.10 | 1.54E-01 | -0.03       | 0.03 | 8.06E-01 |
| TIGD2    | No            | Yes            | No                                     | Down                      | 0.72                             | 0.024532            | 0.0007     | -0.72                               | 0.11 | 2.96E-02 | -0.73       | 0.04 | 2.21E-03 | -0.38        | 0.10 | 1.75E-01 | -0.07    | 0.11 | 8.43E-01 | -0.57    | 0.14 | 1.12E-01 | -0.77        | 0.21 | 1.26E-01 | -0.25        | 0.10 | 3.51E-01 | -0.26       | 0.03 | 3.01E-01 |
| CLCA4    | No            | No             | No                                     | Down                      | 0.72                             | 0.006681            | 1.5E-19    | -0.36                               | 0.10 | 2.10E-01 | -0.61       | 0.04 | 3.48E-03 | -0.49        | 0.10 | 4.49E-02 | -0.36    | 0.11 | 1.86E-01 | -0.39    | 0.14 | 1.72E-01 | -0.78        | 0.22 | 3.85E-01 | -0.34        | 0.10 | 2.10E-01 | -0.41       | 0.03 | 6.30E-03 |
| KIAA1199 | No            | No             | No                                     | Down                      | 0.72                             | 0.000429            | 0.0142     | -0.74                               | 0.11 | 3.51E-03 | -0.38       | 0.04 | 8.13E-03 | -0.19        | 0.10 | 3.75E-01 | -0.98    | 0.13 | 1.03E-03 | -0.42    | 0.14 | 1.28E-01 | -0.25        | 0.20 | 3.22E-01 | -0.53        | 0.10 | 2.04E-02 | -0.24       | 0.03 | 1.05E-01 |
| OSTALPHA | No            | Yes            | No                                     | Down                      | 0.72                             | 0.001025            | 0.01538    | -0.49                               | 0.10 | 4.96E-02 | -0.62       | 0.04 | 4.82E-04 | -0.28        | 0.10 | 2.57E-01 | -0.16    | 0.11 | 5.18E-01 | -0.75    | 0.14 | 8.50E-02 | -0.73        | 0.21 | 1.56E-01 | -0.13        | 0.10 | 6.17E-01 | -0.58       | 0.03 | 2.77E-04 |
| RAB36    | No            | No             | No                                     | Down                      | 0.72                             | 0.002625            | validated  | -0.42                               | 0.10 | 9.76E-02 | -0.65       | 0.04 | 4.35E-04 | -0.31        | 0.10 | 2.45E-01 | -0.83    | 0.12 | 1.42E-02 | -0.79    | 0.15 | 4.27E-02 | -0.03        | 0.20 | 9.41E-01 | -0.20        | 0.10 | 4.36E-01 | -0.50       | 0.03 | 2.77E-02 |
| DMBT1    | No            | Yes            | No                                     | Down                      | 0.72                             | 1.14E-05            | 2E-05      | -0.76                               | 0.11 | 2.42E-03 | -0.83       | 0.04 | 1.36E-06 | -0.15        | 0.10 | 5.20E-01 | -1.02    | 0.13 | 2.44E-04 | -0.20    | 0.14 | 2.94E-01 | -0.03        | 0.20 | 8.65E-01 | -0.37        | 0.10 | 9.73E-02 | -0.37       | 0.03 | 3.06E-02 |
| TMEM141  | No            | No             | No                                     | Down                      | 0.72                             | 0.017303            | validated  | -0.06                               | 0.10 | 8.55E-01 | -0.63       | 0.04 | 4.99E-03 | -0.50        | 0.10 | 1.52E-01 | -0.92    | 0.12 | 3.99E-02 | -0.42    | 0.14 | 1.38E-01 | -0.45        | 0.21 | 1.59E-01 | -0.29        | 0.10 | 3.77E-01 | -0.47       | 0.03 | 2.75E-02 |
| SGMS2    | No            | No             | No                                     | Down                      | 0.72                             | 0.009108            | validated  | -0.14                               | 0.10 | 6.36E-01 | -0.59       | 0.04 | 1.08E-02 | -0.62        | 0.11 | 2.09E-02 | -0.60    | 0.12 | 6.09E-02 | -0.44    | 0.14 | 4.63E-01 | -0.57        | 0.21 | 3.44E-01 | -0.04        | 0.10 | 8.54E-01 | -0.72       | 0.03 | 9.60E-04 |
| SLC26A9  | No            | No             | No                                     | Down                      | 0.72                             | 0.006163            | validated  | -0.38                               | 0.10 | 1.16E-01 | -0.36       | 0.04 | 2.48E-02 | -0.72        | 0.11 | 1.58E-02 | -0.95    | 0.13 | 1.04E-03 | -0.52    | 0.14 | 3.33E-01 | -0.11        | 0.20 | 8.32E-01 | -0.49        | 0.10 | 1.20E-01 | -0.18       | 0.03 | 2.18E-01 |
| PLA1A    | No            | No             | No                                     | Down                      | 0.72                             | 0.000974            | validated  | -0.63                               | 0.10 | 1.44E-02 | -0.26       | 0.04 | 7.73E-02 | -0.73        | 0.11 | 3.85E-03 | -0.53    | 0.12 | 4.40E-02 | -0.29    | 0.14 | 2.62E-01 | -0.43        | 0.20 | 1.66E-01 | -0.42        | 0.10 | 8.82E-02 | -0.44       | 0.03 | 8.99E-03 |
| CLDN10   | No            | No             | No                                     | Down                      | 0.73                             | 0.000404            | validated  | -0.45                               | 0.10 | 4.28E-02 | -0.28       | 0.04 | 3.02E-02 | -0.24        | 0.10 | 2.27E-01 | -0.42    | 0.12 | 7.66E-02 | -0.90    | 0.15 | 2.56E-03 | -0.89        | 0.22 | 1.03E-02 | -0.07        | 0.10 | 6.89E-01 | -0.46       | 0.03 | 2.09E-03 |
| SLC23A1  | No            | Yes            | No                                     | Down                      | 0.73                             | 0.000227            | 0.0044     | -0.42                               | 0.10 | 8.23E-02 | -0.81       | 0.04 | 1.34E-04 | -0.70        | 0.11 | 9.83E-03 | -0.18    | 0.11 | 4.51E-01 | -0.29    | 0.14 | 4.19E-01 | -0.31        | 0.20 | 7.32E-01 | -0.35        | 0.10 | 1.54E-01 | -0.66       | 0.03 | 1.29E-04 |
| SLC39A11 | No            | No             | No                                     | Down                      | 0.73                             | 0.015565            | validated  | -0.14                               | 0.10 | 6.28E-01 | -0.47       | 0.04 | 1.58E-02 | -0.67        | 0.11 | 3.34E-02 | -0.04    | 0.11 | 9.07E-01 | -0.69    | 0.14 | 3.32E-01 | -1.03        | 0.23 | 1.01E-02 | -0.33        | 0.10 | 2.24E-01 | -0.32       | 0.03 | 1.98E-01 |
| IFNGR1   | No            | No             | No                                     | Down                      | 0.73                             | 0.002726            | validated  | -0.41                               | 0.10 | 2.26E-01 | -0.29       | 0.04 | 1.87E-01 | -0.27        | 0.10 | 3.61E-01 | -0.14    | 0.11 | 7.67E-01 | -0.24    | 0.14 | 2.43E-01 | -0.57        | 0.21 | 6.40E-02 | -1.39        | 0.11 | 6.36E-06 | -0.39       | 0.03 | 5.55E-02 |
| MCAT     | No            | No             | No                                     | Down                      | 0.73                             | 0.025417            | validated  | -0.84                               | 0.11 | 4.92E-02 | -0.19       | 0.04 | 1.48E-01 | -0.21        | 0.10 | 5.26E-01 | -0.28    | 0.11 | 2.88E-01 | -0.64    | 0.14 | 7.04E-02 | -0.00        | 0.20 | 9.79E-01 | -0.87        | 0.10 | 8.22E-03 | -0.65       | 0.03 | 2.55E-02 |
| SLC24A1  | No            | No             | No                                     | Down                      | 0.73                             | 0.025215            | validated  | -0.06                               | 0.10 | 8.33E-01 | -0.84       | 0.04 | 7.60E-04 | -0.63        | 0.11 | 6.32E-02 | -0.74    | 0.12 | 4.81E-02 | -0.77    | 0.15 | 2.80E-01 | -0.08        | 0.20 | 8.82E-01 | -0.29        | 0.10 | 3.36E-01 | -0.27       | 0.03 | 9.70E-02 |
| UGT8     | No            | No             | No                                     | Down                      | 0.73                             | 0.002661            | validated  | -0.12                               | 0.10 | 6.31E-01 | -0.45       | 0.04 | 1.11E-02 | -0.39        | 0.10 | 6.71E-02 | -0.49    | 0.12 | 6.69E-02 | -0.59    | 0.14 | 1.13E-01 | -0.61        | 0.21 | 1.96E-01 | -0.60        | 0.10 | 1.53E-02 | -0.42       | 0.03 | 5.71E-03 |
| SPCS2    | No            | No             | No                                     | Down                      | 0.73                             | 0.029114            | validated  | -0.58                               | 0.10 | 1.27E-01 | -0.22       | 0.04 | 2.82E-01 | -0.36        | 0.10 | 2.71E-01 | -0.52    | 0.12 | 1.53E-01 | -0.90    | 0.15 | 2.76E-03 | -0.70        | 0.21 | 3.95E-02 | -0.33        | 0.10 | 1.65E-01 | -0.04       | 0.03 | 8.52E-01 |
| IGGAP2   | No            | Yes            | No                                     | Down                      | 0.73                             | 0.001925            | 0.00573    | -0.42                               | 0.10 | 9.02E-02 | -0.56       | 0.04 | 2.01E-03 | -0.17        | 0.10 | 4.66E-01 | -0.31    | 0.11 | 2.95E-01 | -0.56    | 0.14 | 8.73E-02 | -0.36        | 0.20 | 2.45E-01 | -0.66        | 0.10 | 1.08E-02 | -0.59       | 0.03 | 4.76E-03 |
| GFRA3    | No            | Yes            | No                                     | Down                      | 0.73                             | 0.009161            | 7.1E-05    | -0.52                               | 0.10 | 7.11E-02 | -0.13       | 0.04 | 3.42E-01 | -0.39        | 0.10 | 8.94E-02 | -0.56    | 0.12 | 5.45E-02 | -0.71    | 0.14 | 1.34E-02 | -0.75        | 0.21 | 2.68E-02 | -0.48        | 0.10 | 4.56E-02 | -0.07       | 0.03 | 6.00E-01 |
| CYB561D2 | No            | Yes            | No                                     | Down                      | 0.73                             | 0.042575            | 0.01547    | -0.54                               | 0.10 | 1.35E-01 | -0.45       | 0.04 | 3.61E-02 | -0.87        | 0.11 | 2.81E-02 | -0.22    | 0.11 | 5.56E-01 | -0.59    | 0.14 | 7.47E-02 | -0.64        | 0.21 | 9.16E-02 | -0.07        | 0.10 | 8.30E-01 | -0.23       | 0.03 | 1.48E-01 |
| CTS0     | No            | No             | No                                     | Down                      | 0.73                             | 0.012478            | validated  | -0.36                               | 0.10 | 1.83E-01 | -0.55       | 0.04 | 1.01E-02 | -0.26        | 0.10 | 3.24E-01 | -0.23    | 0.11 | 4.45E-01 | -0.66    | 0.14 | 6.29E-02 | -0.58        | 0.21 | 2.15E-01 | -0.09        | 0.10 | 6.83E-01 | -0.86       | 0.03 | 1.04E-03 |
| SPINK5   | No            | Yes            | No                                     | Down                      | 0.73                             | 0.002774            | 0.00047    | -0.77                               | 0.11 | 1.58E-03 | -0.38       | 0.04 | 7.49E-03 | -0.34        | 0.10 | 1.63E-01 | -0.18    | 0.11 | 4.51E-01 | -0.55    | 0.14 | 2.24E-01 | -0.64        | 0.21 | 2.52E-01 | -0.32        | 0.10 | 1.45E-01 | -0.42       | 0.03 | 9.40E-03 |
| CD96     | No            | Yes            | No                                     | Down                      | 0.73                             | 0.022942            | 0.00946    | -0.59                               | 0.10 | 3.01E-02 | -0.27       | 0.04 | 1.02E-01 | -0.75        | 0.11 | 1.58E-02 | -0.68    | 0.12 | 2.02E-02 | -0.27    | 0.14 | 4.86E-01 | -0.43        | 0.20 | 4.54E-01 | -0.40        | 0.10 | 2.54E-01 | -0.19       | 0.03 | 2.19E-01 |
| TFPI2    | No            | Yes            | No                                     | Down                      | 0.73                             | 0.000307            | 0.00237    | -0.14                               | 0.10 | 5.08E-01 | -0.72       | 0.04 | 2.59E-05 | -0.46        | 0.10 | 3.68E-02 | -0.57    | 0.12 | 3.21E-02 | -0.32    | 0.14 | 2.93E-01 | -0.56        | 0.21 | 2.17E-01 | -0.44        | 0.10 | 4.27E-02 | -0.37       | 0.03 | 1.15E-02 |
| TMEM123  | No            | No             | No                                     | Down                      | 0.73                             | 0.007002            | validated  | -0.51                               | 0.10 | 2.08E-01 | -0.41       | 0.04 | 3.18E-02 | -0.09        | 0.10 | 8.10E-01 | -0.13    | 0.11 | 7.44E-01 | -0.86    | 0.15 | 3.07E-03 | -0.30        | 0.20 | 2.25E-01 | -0.57        | 0.10 | 2.69E-02 | -0.71       | 0.03 | 8.08E-03 |
| CXCL2    | No            | Yes            | No                                     | Down                      | 0.73                             | 0.000125            | 0.00173    | -0.93                               | 0.11 | 4.15E-04 | -0.58       | 0.04 | 2.34E-04 | -0.30        | 0.10 | 1.49E-01 | -0.28    | 0.11 | 2.26E-01 | -0.23    | 0.14 | 3.89E-01 | -0.21        | 0.20 | 4.60E-01 | -0.90        | 0.10 | 4.26E-04 | -0.12       | 0.03 | 3.50E-01 |
| KISS1R   | No            | No             | No                                     | Down                      | 0.73                             | 0.015255            | validated  | -0.57                               | 0.10 | 5.59E-02 | -0.07       | 0.04 | 6.65E-01 | -0.39        | 0.10 | 7.46E-02 | -0.80    | 0.12 | 4.62E-02 | -0.46    | 0.14 | 1.62E-01 | -0.79        | 0.22 | 3.50E-02 | -0.07        | 0.10 | 7.42E-01 | -0.42       | 0.03 | 7.88E-03 |
| RNF39    | No            | No             | No                                     | Down                      | 0.74                             | 0.042046            | validated  | -0.41                               | 0.10 | 1.71E-01 | -0.51       | 0.04 | 1.69E-02 | -0.33        | 0.10 | 2.74E-01 | -0.15    | 0.11 | 5.95E-01 | -1.00    | 0.15 | 6.08E-02 | -0.17        | 0.20 | 7.69E-01 | -0.59        | 0.10 | 9.07E-02 | -0.40       | 0.03 | 3.08E-02 |
| GRM8     | No            | Yes            | No                                     | Down                      | 0.74                             | 0.011227            | 0.04188    | -0.97                               | 0.11 | 4.11E-04 | -0.00       | 0.04 | 9.85E-01 | -0.55        | 0.11 | 3.57E-02 | -0.55    | 0.12 | 3.64E-02 | -0.74    | 0.14 | 3.27E-01 | -0.45        | 0.21 | 1.25E-01 | -0.06        | 0.10 | 8.53E-01 | -0.23       | 0.03 | 1.08E-01 |
| ITIH2    | No            | Yes            | No                                     | Down                      | 0.74                             | 0.005508            | 0.00024    | -0.96                               | 0.11 | 1.64E-03 | -0.32       | 0.04 | 7.81E-02 | -0.68        | 0.11 | 1.22E-02 | -0.82    | 0.12 | 5.00E-03 | -0.35    | 0.14 | 2.66E-01 | -0.19        | 0.20 | 7.66E-01 | -0.06        | 0.10 | 7.90E-01 | -0.17       | 0.03 | 2.69E-01 |
| RAMP3    | No            | Yes            | No                                     | Down                      | 0.74                             | 0.002525            | 1.7E-05    | -0.93                               | 0.11 | 2.26E-03 | -0.66       | 0.04 | 1.31E-03 | -0.73        | 0.11 | 9.42E-03 | -0.22    | 0.11 | 4.26E-01 | -0.06    | 0.14 | 6.61E-01 | -0.13        | 0.20 | 5.18E-01 | -0.60        | 0.10 | 4.92E-02 | -0.19       | 0.03 | 2.68E-01 |
| ORS1E1   | No            | Yes            | No                                     | Down                      | 0.74                             | 0.016392            | 1.5E-19    | -0.83                               | 0.11 | 1.19E-02 | -0.63       | 0.04 | 1.69E-02 | -1.22        | 0.11 | 4.46E-04 | -0.      |      |          |          |      |          |              |      |          |              |      |          |             |      |          |

**Supplementary Table 2. Details for 2,053 genes differentially expressed between EEC and NEEC, identified by microarray meta-analysis.**  
 EEC - endometrioid endometrial cancer, NEEC - non-endometrioid endometrial cancer, SMD - Standardised Mean Difference, FDR - False Discovery Rate, Var - Variance

| Gene     | 145 gene list | 1253 gene list | Associated with EEC-specific survival? | Up/Down Regulated in NEEC | average standardised fold change | Microarray Meta FDR | RNAseq FDR | Individual microarray study results |      |          |             |      |          |              |      |          |          |      |          |          |      |          |              |      |          |              |      |          |             |      |          |
|----------|---------------|----------------|----------------------------------------|---------------------------|----------------------------------|---------------------|------------|-------------------------------------|------|----------|-------------|------|----------|--------------|------|----------|----------|------|----------|----------|------|----------|--------------|------|----------|--------------|------|----------|-------------|------|----------|
|          |               |                |                                        |                           |                                  |                     |            | TCGA                                |      |          | E-MTAB-2532 |      |          | E-GEOD-56026 |      |          | GSE32507 |      |          | GSE24537 |      |          | E-GEOD-23518 |      |          | E-GEOD-17025 |      |          | E-GEOD-2109 |      |          |
|          |               |                |                                        |                           |                                  |                     |            | SMD                                 | Var  | P-value  | SMD         | Var  | P-value  | SMD          | Var  | P-value  | SMD      | Var  | P-value  | SMD      | Var  | P-value  | SMD          | Var  | P-value  | SMD          | Var  | P-value  | SMD         | Var  | P-value  |
| DPEP1    | No            | No             | No                                     | Down                      | 0.75                             | 0.025326            | validated  | -0.51                               | 0.10 | 2.56E-02 | -0.41       | 0.04 | 1.19E-02 | -0.36        | 0.10 | 1.73E-01 | -0.36    | 0.11 | 1.83E-01 | -0.63    | 0.14 | 2.96E-01 | -0.52        | 0.21 | 1.86E-01 | -0.31        | 0.10 | 1.89E-01 | -0.20       | 0.03 | 1.57E-01 |
| HEY2     | No            | No             | No                                     | Down                      | 0.75                             | 0.005801            | 0.01742    | -0.56                               | 0.10 | 2.31E-02 | -0.20       | 0.04 | 1.53E-01 | -0.26        | 0.10 | 2.27E-01 | -0.23    | 0.11 | 3.53E-01 | -0.70    | 0.14 | 1.32E-02 | -0.43        | 0.20 | 1.43E-01 | -0.64        | 0.10 | 9.85E-03 | -0.27       | 0.03 | 7.32E-02 |
| EPHA7    | No            | Yes            | No                                     | Down                      | 0.75                             | 0.001768            | 1.5E-19    | -0.35                               | 0.10 | 1.75E-01 | -0.47       | 0.04 | 5.47E-03 | -0.82        | 0.11 | 1.31E-03 | -0.42    | 0.12 | 8.20E-02 | -0.20    | 0.14 | 9.00E-01 | -0.03        | 0.20 | 9.85E-01 | -0.86        | 0.10 | 6.55E-04 | -0.12       | 0.03 | 3.77E-01 |
| PLAC8    | No            | Yes            | No                                     | Down                      | 0.75                             | 0.010927            | 0.02931    | -0.27                               | 0.10 | 2.52E-01 | -0.52       | 0.04 | 1.77E-03 | -0.53        | 0.11 | 2.95E-02 | -0.05    | 0.11 | 8.55E-01 | -0.52    | 0.14 | 9.19E-02 | -0.80        | 0.22 | 1.06E-01 | -0.22        | 0.10 | 3.39E-01 | -0.33       | 0.03 | 4.96E-02 |
| LYN      | No            | No             | No                                     | Down                      | 0.76                             | 0.008182            | validated  | -0.26                               | 0.10 | 4.29E-01 | -0.54       | 0.04 | 6.28E-03 | -0.44        | 0.10 | 1.04E-01 | -0.15    | 0.11 | 6.56E-01 | -0.26    | 0.14 | 2.25E-01 | -0.70        | 0.21 | 3.43E-02 | -0.12        | 0.10 | 6.10E-01 | -0.77       | 0.03 | 1.00E-03 |
| DYDC2    | No            | No             | No                                     | Down                      | 0.76                             | 0.027615            | validated  | -0.05                               | 0.10 | 8.26E-01 | -0.59       | 0.04 | 2.67E-04 | -0.24        | 0.10 | 2.87E-01 | -0.11    | 0.11 | 6.34E-01 | -0.86    | 0.15 | 1.19E-01 | -0.69        | 0.21 | 3.47E-01 | -0.53        | 0.10 | 4.99E-02 | -0.16       | 0.03 | 2.41E-01 |
| NLRC3    | No            | Yes            | Yes                                    | Down                      | 0.76                             | 0.033818            | 0.0257     | -0.61                               | 0.10 | 7.15E-02 | -0.48       | 0.04 | 7.34E-03 | -0.52        | 0.11 | 6.36E-02 | -0.48    | 0.12 | 9.70E-02 | -0.12    | 0.14 | 7.87E-01 | -0.45        | 0.21 | 4.74E-01 | -0.29        | 0.10 | 2.21E-01 | -0.24       | 0.03 | 1.28E-01 |
| HOXB5    | No            | No             | No                                     | Down                      | 0.76                             | 0.010931            | validated  | -0.30                               | 0.10 | 1.84E-01 | -0.23       | 0.04 | 7.59E-02 | -0.48        | 0.10 | 5.76E-02 | -0.55    | 0.12 | 2.67E-02 | -0.66    | 0.14 | 1.29E-02 | -0.57        | 0.21 | 6.00E-02 | -0.26        | 0.10 | 2.74E-01 | -0.14       | 0.03 | 4.05E-01 |
| CD2      | No            | Yes            | Yes                                    | Down                      | 0.76                             | 0.009629            | 0.03784    | -0.64                               | 0.11 | 9.80E-03 | -0.34       | 0.04 | 2.34E-02 | -0.59        | 0.11 | 3.72E-02 | -0.62    | 0.12 | 2.75E-02 | -0.37    | 0.14 | 2.33E-01 | -0.21        | 0.20 | 4.44E-01 | -0.05        | 0.10 | 8.30E-01 | -0.33       | 0.03 | 6.59E-02 |
| ELP2     | No            | No             | No                                     | Down                      | 0.76                             | 0.024031            | validated  | -0.01                               | 0.10 | 9.63E-01 | -0.31       | 0.04 | 1.40E-01 | -0.85        | 0.11 | 1.41E-02 | -0.01    | 0.11 | 9.87E-01 | -0.37    | 0.14 | 1.81E-01 | -0.14        | 0.20 | 5.38E-01 | -1.30        | 0.11 | 2.11E-04 | -0.15       | 0.03 | 3.50E-01 |
| RARRES3  | No            | No             | No                                     | Down                      | 0.76                             | 0.002071            | validated  | -0.11                               | 0.10 | 6.61E-01 | -0.36       | 0.04 | 1.76E-02 | -0.40        | 0.10 | 8.74E-02 | -0.55    | 0.12 | 4.93E-02 | -0.08    | 0.14 | 5.45E-01 | -0.40        | 0.20 | 1.31E-01 | -0.57        | 0.10 | 2.42E-02 | -0.65       | 0.03 | 3.75E-04 |
| ABCG1    | No            | No             | No                                     | Down                      | 0.76                             | 0.018561            | 0.0496     | -0.52                               | 0.10 | 6.36E-02 | -0.64       | 0.04 | 8.09E-04 | -0.16        | 0.10 | 5.32E-01 | -0.53    | 0.12 | 1.05E-01 | -0.42    | 0.14 | 1.43E-01 | -0.42        | 0.20 | 2.40E-01 | -0.07        | 0.10 | 7.52E-01 | -0.33       | 0.03 | 9.52E-02 |
| NKD1     | No            | Yes            | No                                     | Down                      | 0.77                             | 0.019892            | 0.00101    | -0.68                               | 0.11 | 5.79E-03 | -0.17       | 0.04 | 2.15E-01 | -0.39        | 0.10 | 1.13E-01 | -0.20    | 0.11 | 3.84E-01 | -0.47    | 0.14 | 1.15E-01 | -0.61        | 0.21 | 5.13E-02 | -0.51        | 0.10 | 2.80E-02 | -0.01       | 0.03 | 9.51E-01 |
| SLC28A3  | No            | Yes            | No                                     | Down                      | 0.77                             | 0.008311            | 0.00885    | -0.03                               | 0.10 | 9.06E-01 | -0.59       | 0.04 | 4.39E-03 | -0.27        | 0.10 | 2.22E-01 | -0.33    | 0.11 | 2.10E-01 | -0.25    | 0.14 | 6.47E-01 | -0.57        | 0.21 | 4.38E-01 | -0.25        | 0.10 | 2.25E-01 | -0.73       | 0.03 | 7.66E-05 |
| CD3D     | No            | Yes            | Yes                                    | Down                      | 0.77                             | 0.017044            | 0.00715    | -0.65                               | 0.11 | 2.09E-02 | -0.44       | 0.04 | 7.17E-03 | -0.66        | 0.11 | 3.55E-02 | -0.32    | 0.11 | 2.00E-01 | -0.20    | 0.14 | 4.45E-01 | -0.15        | 0.20 | 5.36E-01 | -0.27        | 0.10 | 3.16E-01 | -0.31       | 0.03 | 6.98E-02 |
| TPD52L1  | No            | No             | No                                     | Down                      | 0.77                             | 0.013996            | validated  | -0.03                               | 0.10 | 9.07E-01 | -0.46       | 0.04 | 5.92E-03 | -0.70        | 0.11 | 1.06E-02 | -0.10    | 0.11 | 7.23E-01 | -0.70    | 0.14 | 1.45E-02 | -0.77        | 0.21 | 2.36E-02 | -0.05        | 0.10 | 8.43E-01 | -0.19       | 0.03 | 2.87E-01 |
| NOTUM    | No            | No             | No                                     | Down                      | 0.77                             | 0.026361            | validated  | -0.42                               | 0.10 | 6.00E-02 | -0.10       | 0.04 | 4.21E-01 | -0.29        | 0.10 | 2.18E-01 | -0.36    | 0.11 | 1.36E-01 | -0.47    | 0.14 | 6.69E-02 | -0.80        | 0.22 | 1.60E-02 | -0.35        | 0.10 | 1.73E-01 | -0.20       | 0.03 | 1.26E-01 |
| DDIT4L   | No            | Yes            | Yes                                    | Down                      | 0.77                             | 0.005375            | 1.5E-19    | -0.68                               | 0.11 | 6.29E-03 | -0.27       | 0.04 | 5.06E-02 | -0.57        | 0.11 | 1.98E-02 | -0.13    | 0.11 | 5.81E-01 | -0.04    | 0.14 | 7.32E-01 | -0.40        | 0.20 | 1.43E-01 | -0.82        | 0.10 | 1.39E-03 | -0.07       | 0.03 | 5.96E-01 |
| BCAS1    | No            | No             | No                                     | Down                      | 0.77                             | 0.043449            | validated  | -0.53                               | 0.10 | 6.22E-02 | -0.55       | 0.04 | 2.33E-03 | -0.10        | 0.10 | 7.79E-01 | -0.51    | 0.12 | 8.18E-02 | -0.52    | 0.14 | 2.83E-01 | -0.32        | 0.20 | 5.58E-01 | -0.16        | 0.10 | 6.19E-01 | -0.28       | 0.03 | 7.45E-02 |
| UHMK1    | No            | No             | No                                     | Down                      | 0.78                             | 0.048752            | validated  | -0.49                               | 0.10 | 1.01E-01 | -0.37       | 0.04 | 6.25E-02 | -0.12        | 0.10 | 6.41E-01 | -0.04    | 0.11 | 9.20E-01 | -0.16    | 0.14 | 5.64E-01 | -0.27        | 0.20 | 6.13E-01 | -1.02        | 0.10 | 1.60E-03 | -0.41       | 0.03 | 4.57E-02 |
| CCL21    | No            | No             | No                                     | Down                      | 0.78                             | 0.038456            | 0.03038    | -0.31                               | 0.10 | 3.45E-01 | -0.54       | 0.04 | 2.76E-03 | -0.10        | 0.10 | 6.71E-01 | -0.67    | 0.12 | 6.07E-02 | -0.04    | 0.14 | 7.61E-01 | -0.40        | 0.22 | 3.36E-02 | -0.13        | 0.10 | 7.85E-01 | -0.28       | 0.03 | 6.22E-02 |
| CIORF116 | No            | No             | No                                     | Down                      | 0.78                             | 0.00225             | validated  | -0.02                               | 0.10 | 9.19E-01 | -0.47       | 0.04 | 3.49E-03 | -0.48        | 0.10 | 4.70E-02 | -0.57    | 0.12 | 3.72E-02 | -0.16    | 0.14 | 4.33E-01 | -0.82        | 0.22 | 2.54E-01 | -0.13        | 0.10 | 5.28E-01 | -0.61       | 0.03 | 1.24E-04 |
| TRIM22   | No            | No             | Yes                                    | Down                      | 0.78                             | 0.006067            | validated  | -0.44                               | 0.10 | 9.18E-02 | -0.73       | 0.04 | 2.61E-04 | -0.05        | 0.10 | 8.27E-01 | -0.25    | 0.11 | 3.55E-01 | -0.01    | 0.14 | 9.63E-01 | -0.40        | 0.20 | 2.29E-01 | -0.30        | 0.10 | 1.73E-01 | -0.69       | 0.03 | 1.60E-03 |
| SEC16B   | No            | Yes            | No                                     | Down                      | 0.78                             | 0.014126            | 0.03499    | -0.20                               | 0.10 | 6.10E-01 | -0.72       | 0.04 | 2.94E-04 | -0.67        | 0.11 | 1.46E-02 | -0.77    | 0.12 | 1.01E-02 | -0.08    | 0.14 | 9.45E-01 | -0.03        | 0.20 | 9.81E-01 | -0.25        | 0.10 | 2.62E-01 | -0.10       | 0.03 | 5.40E-01 |
| RFK2     | No            | Yes            | No                                     | Down                      | 0.79                             | 0.024042            | 0.00383    | -0.77                               | 0.11 | 1.60E-02 | -0.53       | 0.04 | 1.66E-03 | -0.20        | 0.10 | 4.41E-01 | -0.22    | 0.11 | 4.24E-01 | -0.36    | 0.14 | 2.37E-01 | -0.31        | 0.20 | 3.28E-01 | -0.04        | 0.10 | 8.54E-01 | -0.32       | 0.03 | 4.12E-02 |
| TRIM31   | No            | No             | No                                     | Down                      | 0.79                             | 0.028534            | validated  | -0.28                               | 0.10 | 3.06E-01 | -0.60       | 0.04 | 4.28E-03 | -0.60        | 0.11 | 1.93E-02 | -0.71    | 0.12 | 8.08E-03 | -0.41    | 0.14 | 1.73E-01 | -0.02        | 0.20 | 9.60E-01 | -0.11        | 0.10 | 6.50E-01 | 0.00        | 0.03 | 9.83E-01 |
| CD1A     | No            | No             | No                                     | Down                      | 0.79                             | 0.040911            | validated  | -0.23                               | 0.10 | 3.52E-01 | -0.70       | 0.04 | 1.32E-04 | -0.17        | 0.10 | 5.24E-01 | -0.30    | 0.11 | 2.20E-01 | -0.36    | 0.14 | 3.20E-01 | -0.28        | 0.20 | 3.99E-01 | -0.59        | 0.10 | 1.06E-01 | -0.07       | 0.03 | 6.94E-01 |
| CXCL5    | No            | No             | No                                     | Down                      | 0.80                             | 0.015848            | validated  | -0.25                               | 0.10 | 3.91E-01 | -0.27       | 0.04 | 4.33E-02 | -0.16        | 0.10 | 3.80E-01 | -0.25    | 0.11 | 2.76E-01 | -0.69    | 0.14 | 2.41E-02 | -0.02        | 0.20 | 8.96E-01 | -0.77        | 0.10 | 1.12E-03 | -0.21       | 0.03 | 1.10E-01 |
| EPDR1    | No            | No             | No                                     | Down                      | 0.80                             | 0.013475            | 0.03379    | -0.44                               | 0.10 | 7.69E-02 | -0.51       | 0.04 | 1.92E-03 | -0.36        | 0.10 | 1.07E-01 | -0.28    | 0.11 | 2.65E-01 | -0.30    | 0.14 | 1.66E-01 | -0.16        | 0.20 | 4.19E-01 | -0.15        | 0.10 | 4.53E-01 | -0.40       | 0.03 | 2.65E-02 |
| RBP1     | No            | No             | No                                     | Down                      | 0.81                             | 0.035912            | validated  | -0.04                               | 0.10 | 8.70E-01 | -0.11       | 0.04 | 4.18E-01 | -0.05        | 0.10 | 7.97E-01 | -0.12    | 0.11 | 6.55E-01 | -0.86    | 0.15 | 2.49E-03 | -0.31        | 0.20 | 2.03E-01 | -0.76        | 0.10 | 3.19E-03 | -0.23       | 0.03 | 1.31E-01 |
| DPYSL4   | No            | No             | No                                     | Up                        | 1.22                             | 0.034747            | validated  | 0.05                                | 0.10 | 8.23E-01 | 0.43        | 0.04 | 8.51E-03 | 0.06         | 0.10 | 8.21E-01 | 1.30     | 0.14 | 6.11E-05 | 0.30     | 0.14 | 2.09E-01 | 0.12         | 0.20 | 5.75E-01 | 0.00         | 0.10 | 9.94E-01 | 0.02        | 0.03 | 8.73E-01 |
| GALNT14  | No            | Yes            | No                                     | Up                        | 1.25                             | 0.004032            | 1.5E-19    | 0.57                                | 0.10 | 9.38E-03 | 0.51        | 0.04 | 5.77E-04 | 0.28         | 0.10 | 2.10E-01 | 0.25     | 0.11 | 2.64E-01 | 0.33     | 0.14 | 5.37E-01 | 0.35         | 0.20 | 8.50E-01 | 0.09         | 0.10 | 6.85E-01 | 0.47        | 0.03 | 1.76E-03 |
| CLIC4    | No            | No             | No                                     | Up                        | 1.27                             | 0.04916             | validated  | 0.15                                | 0.10 | 6.24E-01 | 0.05        | 0.04 | 7.37E-01 | 0.37         | 0.10 | 1.93E-01 | 1.32     | 0.14 | 1.48E-04 | 0.19     | 0.14 | 3.30E-01 | 0.11         | 0.20 | 1.96E-01 | 0.02         | 0.10 | 9.26E-01 | 0.30        | 0.03 | 1.23E-01 |
| C3ORF14  | No            | No             | No                                     | Up                        | 1.28                             | 0.012991            | 0.00249    | 0.32                                | 0.10 | 1.49E-01 | 0.46        | 0.04 | 5.40E-03 | 0.35         | 0.10 | 1.26E-03 | 0.33     | 0.11 | 1.91E-01 | 0.26     | 0.14 | 2.66E-01 | 0.23         | 0.20 | 3.83E-01 | 0.53         | 0.10 | 3.06E-02 | 0.33        | 0.03 | 4.67E-02 |
| IFITM2   | No            | No             | No                                     | Up                        | 1.28                             | 0.021189            | validated  | 0.78                                | 0.11 | 4.98E-03 | 0.30        | 0.04 | 9.49E-02 | 0.28         | 0.10 | 3.30E-01 | 0.17     | 0.11 | 5.59E-01 | 1.01     | 0.15 | 6.77E-04 | 0.30         | 0.20 | 2.14E-01 | 0.01         | 0.10 | 9.79E-01 | 0.05        | 0.03 | 8.02E-01 |
| CSPG5    | No            | No             | No                                     | Up                        | 1.29                             | 0.03981             | 0.04384    | 0.79                                | 0.11 | 1.73E-02 | 0.31        | 0.04 | 9.53E-02 | 0.44         | 0.10 | 6.73E-02 | 0.17     | 0.11 | 6.21E-01 | 0.24     | 0.14 | 3.80E-01 | 0.34         | 0.20 | 2.95E-01 | 0.21         | 0.10 | 3.59E-01 | 0.45        | 0.03 | 1.91E-02 |
| PRRT3    | No            | No             | No                                     | Up                        | 1.29                             | 0.024577            | validated  | 0.30                                | 0.10 | 2.73E-01 | 0.97        | 0.04 | 1.86E-05 | 0.41         | 0.10 | 1.63E-01 | 0.26     | 0.11 | 1.63E-01 | 0.04     | 0.14 | 8.49E-01 | 0.58         | 0.21 | 2.86E-01 | 0.26         | 0.10 | 3.85E-01 | 0.15        | 0.03 | 3.91E-01 |
| IRF9     | No            | Yes            | No                                     | Up                        | 1.30                             | 0.037015            | 0.0022     | 0.57                                | 0.10 | 4.71E-02 | 0.42        | 0.04 | 2.99E-02 | 0.71         | 0.11 | 2.21E-02 | 0.03     | 0.   |          |          |      |          |              |      |          |              |      |          |             |      |          |

**Supplementary Table 2. Details for 2,053 genes differentially expressed between EEC and NEEC, identified by microarray meta-analysis.**  
 EEC - endometrioid endometrial cancer, NEEC - non-endometrioid endometrial cancer, SMD - Standardised Mean Difference, FDR - False Discovery Rate, Var - Variance

| Gene      | 145 gene list | 1253 gene list | Associated with EEC-specific survival? | Up/Down Regulated in NEEC | average standardised fold change | Microarray Meta FDR | RNASeq FDR | Individual microarray study results |      |          |             |      |          |              |      |          |          |      |          |      |          |          |      |      |              |      |      |              |      |      |             |  |  |
|-----------|---------------|----------------|----------------------------------------|---------------------------|----------------------------------|---------------------|------------|-------------------------------------|------|----------|-------------|------|----------|--------------|------|----------|----------|------|----------|------|----------|----------|------|------|--------------|------|------|--------------|------|------|-------------|--|--|
|           |               |                |                                        |                           |                                  |                     |            | TCGA                                |      |          | E-MTAB-2532 |      |          | E-GEOD-56026 |      |          | GSE32507 |      |          |      | GSE24537 |          |      |      | E-GEOD-23518 |      |      | E-GEOD-17025 |      |      | E-GEOD-2109 |  |  |
|           |               |                |                                        |                           |                                  |                     |            | SMD                                 | Var  | P-value  | SMD         | Var  | P-value  | SMD          | Var  | P-value  | SMD      | Var  | P-value  | SMD  | Var      | P-value  | SMD  | Var  | P-value      | SMD  | Var  | P-value      | SMD  | Var  | P-value     |  |  |
| BAALC     | No            | No             | No                                     | Up                        | 1.34                             | 0.02326             | validated  | 0.31                                | 0.10 | 2.43E-01 | 0.11        | 0.04 | 5.58E-01 | 0.42         | 0.10 | 1.42E-01 | 1.18     | 0.13 | 1.52E-04 | 0.06 | 0.14     | 7.49E-01 | 0.85 | 0.22 | 1.94E-01     | 0.16 | 0.10 | 5.93E-01     | 0.30 | 0.03 | 4.93E-02    |  |  |
| TNRC6C    | No            | Yes            | No                                     | Up                        | 1.34                             | 0.042508            | 0.00649    | 0.12                                | 0.10 | 7.74E-01 | 0.40        | 0.04 | 2.22E-02 | 0.36         | 0.10 | 2.01E-01 | 0.63     | 0.12 | 9.36E-02 | 0.71 | 0.14     | 5.02E-01 | 0.37 | 0.20 | 6.22E-01     | 0.22 | 0.10 | 4.56E-01     | 0.60 | 0.03 | 1.38E-03    |  |  |
| MKX       | No            | No             | No                                     | Up                        | 1.34                             | 0.001465            | validated  | 0.32                                | 0.10 | 1.80E-01 | 0.31        | 0.04 | 5.51E-02 | 0.38         | 0.10 | 7.89E-02 | 0.55     | 0.12 | 3.28E-02 | 0.57 | 0.14     | 3.16E-02 | 0.44 | 0.20 | 1.14E-01     | 0.33 | 0.10 | 1.27E-01     | 0.50 | 0.03 | 1.31E-03    |  |  |
| PIWIL4    | No            | No             | No                                     | Up                        | 1.35                             | 0.048442            | 0.01117    | 0.77                                | 0.11 | 1.11E-02 | 0.27        | 0.04 | 1.22E-01 | 0.26         | 0.10 | 3.26E-01 | 0.30     | 0.11 | 2.92E-01 | 0.69 | 0.14     | 3.90E-01 | 0.03 | 0.20 | 9.63E-01     | 0.90 | 0.10 | 7.09E-03     | 0.21 | 0.03 | 2.69E-01    |  |  |
| LOX       | No            | No             | No                                     | Up                        | 1.35                             | 0.001052            | validated  | 0.09                                | 0.10 | 7.01E-01 | 0.35        | 0.04 | 2.39E-02 | 0.24         | 0.10 | 2.51E-01 | 0.87     | 0.12 | 2.24E-03 | 0.53 | 0.14     | 5.49E-02 | 0.53 | 0.21 | 9.42E-02     | 0.27 | 0.10 | 2.13E-01     | 0.54 | 0.03 | 7.43E-04    |  |  |
| HOMER3    | No            | No             | No                                     | Up                        | 1.35                             | 0.031737            | validated  | 0.52                                | 0.10 | 9.24E-02 | 0.49        | 0.04 | 1.32E-02 | 0.51         | 0.10 | 1.15E-01 | 0.50     | 0.12 | 1.70E-01 | 0.44 | 0.14     | 1.72E-01 | 0.63 | 0.21 | 1.55E-01     | 0.01 | 0.10 | 9.64E-01     | 0.33 | 0.03 | 4.66E-02    |  |  |
| PSIP1     | No            | No             | No                                     | Up                        | 1.35                             | 0.016929            | validated  | 0.11                                | 0.10 | 7.40E-01 | 0.62        | 0.04 | 3.25E-03 | 0.61         | 0.11 | 7.00E-02 | 0.06     | 0.11 | 8.48E-01 | 0.56 | 0.14     | 1.40E-01 | 0.58 | 0.21 | 1.80E-01     | 0.33 | 0.10 | 1.71E-01     | 0.57 | 0.03 | 8.99E-03    |  |  |
| ANGPTL7   | No            | No             | No                                     | Up                        | 1.35                             | 0.035025            | 0.00068    | 0.64                                | 0.11 | 1.66E-02 | 0.45        | 0.04 | 3.79E-02 | 0.09         | 0.10 | 8.66E-01 | 0.49     | 0.12 | 5.18E-02 | 0.74 | 0.14     | 3.49E-01 | 0.15 | 0.20 | 9.04E-01     | 0.49 | 0.10 | 3.05E-01     | 0.41 | 0.03 | 1.38E-02    |  |  |
| LMMNB2    | No            | No             | No                                     | Up                        | 1.35                             | 0.021968            | validated  | 0.16                                | 0.10 | 6.29E-01 | 0.41        | 0.04 | 3.28E-02 | 0.26         | 0.10 | 3.27E-01 | 0.37     | 0.11 | 3.38E-01 | 0.77 | 0.15     | 1.52E-02 | 0.70 | 0.21 | 4.13E-02     | 0.41 | 0.10 | 1.20E-01     | 0.37 | 0.03 | 6.24E-02    |  |  |
| CSDA      | No            | Yes            | No                                     | Up                        | 1.35                             | 0.005735            | 0.00211    | 0.22                                | 0.10 | 4.67E-01 | 0.63        | 0.04 | 1.66E-03 | 0.85         | 0.11 | 1.27E-02 | 0.03     | 0.11 | 9.00E-01 | 0.27 | 0.14     | 1.95E-01 | 0.53 | 0.21 | 6.89E-02     | 0.80 | 0.10 | 7.67E-03     | 0.14 | 0.03 | 4.15E-01    |  |  |
| CHRNA5    | No            | No             | No                                     | Up                        | 1.35                             | 0.004549            | validated  | 0.12                                | 0.10 | 6.17E-01 | 0.43        | 0.04 | 1.37E-02 | 0.84         | 0.11 | 4.83E-03 | 0.71     | 0.12 | 1.25E-02 | 0.43 | 0.14     | 8.09E-02 | 0.22 | 0.20 | 3.43E-01     | 0.30 | 0.10 | 4.37E-01     | 0.43 | 0.03 | 3.57E-02    |  |  |
| KIF14     | No            | No             | No                                     | Up                        | 1.35                             | 0.005485            | 0.00394    | 0.24                                | 0.10 | 3.97E-01 | 0.49        | 0.04 | 2.05E-02 | 0.10         | 0.10 | 6.56E-01 | 0.78     | 0.12 | 1.24E-02 | 0.40 | 0.14     | 2.64E-01 | 0.24 | 0.20 | 4.28E-01     | 0.60 | 0.10 | 1.64E-02     | 0.62 | 0.03 | 2.74E-03    |  |  |
| USP42     | No            | No             | No                                     | Up                        | 1.35                             | 0.030408            | validated  | 0.08                                | 0.10 | 8.31E-01 | 0.07        | 0.04 | 6.56E-01 | 0.17         | 0.10 | 6.33E-01 | 0.73     | 0.12 | 8.65E-02 | 0.41 | 0.14     | 1.94E-01 | 0.70 | 0.21 | 9.00E-02     | 0.90 | 0.10 | 2.81E-03     | 0.41 | 0.03 | 1.74E-02    |  |  |
| BRSK1     | No            | No             | No                                     | Up                        | 1.35                             | 0.029988            | validated  | 0.09                                | 0.10 | 8.08E-01 | 0.70        | 0.04 | 1.73E-02 | 0.05         | 0.10 | 8.94E-01 | 0.15     | 0.11 | 5.81E-01 | 0.26 | 0.14     | 2.64E-01 | 0.75 | 0.21 | 5.47E-02     | 1.07 | 0.10 | 1.87E-02     | 0.44 | 0.03 | 1.25E-02    |  |  |
| KCNK1     | No            | No             | No                                     | Up                        | 1.35                             | 0.000235            | 0.01499    | 0.43                                | 0.10 | 7.39E-02 | 0.81        | 0.04 | 5.57E-04 | 0.04         | 0.10 | 9.09E-01 | 1.13     | 0.13 | 1.08E-04 | 0.26 | 0.14     | 8.31E-01 | 0.10 | 0.20 | 9.36E-01     | 0.09 | 0.10 | 8.26E-01     | 0.65 | 0.03 | 1.23E-04    |  |  |
| MCM6      | No            | No             | No                                     | Up                        | 1.35                             | 0.004078            | 0.02799    | 0.25                                | 0.10 | 3.82E-01 | 0.63        | 0.04 | 1.33E-03 | 0.43         | 0.10 | 1.44E-01 | 0.99     | 0.13 | 1.00E-02 | 0.48 | 0.14     | 5.64E-02 | 0.40 | 0.20 | 7.69E-01     | 0.22 | 0.10 | 3.78E-01     | 0.45 | 0.03 | 1.43E-02    |  |  |
| C16ORF45  | No            | No             | No                                     | Up                        | 1.36                             | 0.03159             | validated  | 0.10                                | 0.10 | 7.04E-01 | 0.06        | 0.04 | 6.56E-01 | 0.37         | 0.10 | 2.20E-01 | 0.82     | 0.12 | 7.55E-03 | 0.89 | 0.15     | 3.52E-02 | 0.29 | 0.20 | 4.30E-01     | 0.59 | 0.10 | 6.12E-02     | 0.43 | 0.03 | 3.97E-02    |  |  |
| ADAMTS1   | No            | Yes            | No                                     | Up                        | 1.36                             | 0.002576            | 0.00013    | 0.63                                | 0.10 | 1.56E-02 | 0.57        | 0.04 | 1.31E-03 | 0.25         | 0.10 | 2.49E-01 | 0.25     | 0.11 | 3.54E-01 | 0.61 | 0.14     | 4.71E-02 | 0.59 | 0.21 | 8.62E-02     | 0.22 | 0.10 | 3.10E-01     | 0.40 | 0.03 | 2.49E-02    |  |  |
| CD47      | No            | Yes            | No                                     | Up                        | 1.36                             | 0.002704            | 1.5E-19    | 1.33                                | 0.12 | 1.69E-04 | 0.32        | 0.04 | 3.38E-02 | 0.22         | 0.10 | 3.55E-01 | 0.55     | 0.12 | 9.40E-02 | 0.14 | 0.14     | 4.72E-01 | 0.11 | 0.20 | 5.64E-01     | 0.53 | 0.10 | 2.42E-02     | 0.33 | 0.03 | 5.09E-02    |  |  |
| GABARAPL1 | No            | No             | No                                     | Up                        | 1.36                             | 0.020271            | 0.01843    | 0.53                                | 0.10 | 5.68E-02 | 0.02        | 0.04 | 9.14E-01 | 0.55         | 0.11 | 6.44E-02 | 0.42     | 0.12 | 1.68E-01 | 0.82 | 0.15     | 9.78E-03 | 0.07 | 0.20 | 6.98E-01     | 0.97 | 0.10 | 6.08E-03     | 0.16 | 0.03 | 3.82E-01    |  |  |
| TMEM176A  | No            | Yes            | No                                     | Up                        | 1.36                             | 0.000982            | 1.5E-19    | 0.65                                | 0.11 | 2.22E-02 | 0.54        | 0.04 | 1.98E-03 | 0.15         | 0.10 | 5.26E-01 | 0.27     | 0.11 | 3.69E-01 | 0.65 | 0.14     | 3.97E-02 | 0.25 | 0.20 | 4.52E-01     | 0.35 | 0.10 | 1.42E-01     | 0.69 | 0.03 | 3.03E-04    |  |  |
| PDZD2     | No            | No             | No                                     | Up                        | 1.36                             | 0.013297            | validated  | 0.64                                | 0.11 | 2.98E-02 | 0.30        | 0.04 | 7.71E-02 | 0.13         | 0.10 | 5.67E-01 | 0.25     | 0.11 | 3.69E-01 | 1.15 | 0.16     | 2.74E-02 | 0.25 | 0.20 | 5.08E-01     | 0.28 | 0.10 | 2.01E-01     | 0.56 | 0.03 | 2.23E-03    |  |  |
| PROCR     | No            | No             | No                                     | Up                        | 1.36                             | 0.037911            | validated  | 0.11                                | 0.10 | 6.57E-01 | 0.45        | 0.04 | 1.12E-02 | 0.08         | 0.10 | 7.32E-01 | 0.25     | 0.11 | 4.06E-01 | 0.88 | 0.15     | 3.67E-02 | 0.68 | 0.21 | 1.53E-01     | 0.84 | 0.10 | 1.99E-02     | 0.27 | 0.03 | 1.89E-01    |  |  |
| MAP3K12   | No            | Yes            | No                                     | Up                        | 1.36                             | 0.010383            | 0.00081    | 1.11                                | 0.11 | 2.14E-03 | 0.66        | 0.04 | 2.81E-03 | 0.37         | 0.10 | 2.94E-01 | 0.44     | 0.12 | 1.70E-01 | 0.07 | 0.14     | 8.32E-01 | 0.05 | 0.20 | 8.95E-01     | 0.46 | 0.10 | 2.16E-01     | 0.40 | 0.03 | 3.32E-02    |  |  |
| KREMEN2   | No            | Yes            | No                                     | Up                        | 1.36                             | 0.002715            | 1.5E-19    | 0.61                                | 0.10 | 1.71E-02 | 0.71        | 0.04 | 5.86E-05 | 0.65         | 0.11 | 1.73E-01 | 0.15     | 0.11 | 5.33E-01 | 0.04 | 0.14     | 8.10E-01 | 0.15 | 0.20 | 5.41E-01     | 0.90 | 0.10 | 5.60E-02     | 0.36 | 0.03 | 2.81E-02    |  |  |
| HRC       | No            | No             | No                                     | Up                        | 1.36                             | 0.002476            | validated  | 0.09                                | 0.10 | 6.76E-01 | 0.57        | 0.04 | 1.42E-03 | 0.37         | 0.10 | 2.83E-01 | 0.45     | 0.12 | 1.01E-01 | 0.51 | 0.14     | 2.28E-01 | 0.67 | 0.21 | 6.58E-02     | 0.25 | 0.10 | 6.56E-01     | 0.66 | 0.03 | 1.66E-04    |  |  |
| RRAS      | No            | Yes            | No                                     | Up                        | 1.36                             | 0.016477            | 0.00128    | 0.80                                | 0.11 | 1.93E-02 | 0.43        | 0.04 | 2.17E-02 | 0.41         | 0.10 | 1.77E-01 | 0.30     | 0.11 | 3.72E-01 | 0.46 | 0.14     | 6.34E-02 | 0.77 | 0.21 | 2.23E-02     | 0.21 | 0.10 | 4.83E-01     | 0.20 | 0.03 | 2.71E-01    |  |  |
| SLITRK4   | No            | No             | No                                     | Up                        | 1.36                             | 0.000796            | 0.04189    | 0.94                                | 0.11 | 1.47E-04 | 0.18        | 0.04 | 1.73E-01 | 0.28         | 0.10 | 2.12E-01 | 0.29     | 0.11 | 2.26E-01 | 0.72 | 0.14     | 3.80E-02 | 0.42 | 0.20 | 2.29E-01     | 0.24 | 0.10 | 3.61E-01     | 0.51 | 0.03 | 1.03E-03    |  |  |
| CRMP1     | No            | No             | Yes                                    | Up                        | 1.37                             | 0.012249            | 0.00867    | 0.10                                | 0.10 | 7.03E-01 | 0.22        | 0.04 | 1.32E-01 | 0.17         | 0.10 | 6.52E-01 | 1.20     | 0.13 | 6.79E-04 | 0.14 | 0.14     | 4.55E-01 | 0.66 | 0.21 | 4.71E-02     | 0.68 | 0.10 | 8.66E-02     | 0.42 | 0.03 | 3.17E-02    |  |  |
| KLF12     | No            | Yes            | No                                     | Up                        | 1.37                             | 0.015448            | 0.00039    | 0.45                                | 0.10 | 7.99E-02 | 0.63        | 0.04 | 1.94E-03 | 0.56         | 0.11 | 3.02E-02 | 0.47     | 0.12 | 9.61E-02 | 0.28 | 0.14     | 4.47E-01 | 0.96 | 0.22 | 1.11E-01     | 0.07 | 0.10 | 7.35E-01     | 0.16 | 0.03 | 2.68E-01    |  |  |
| UBE2I     | No            | No             | No                                     | Up                        | 1.37                             | 0.008994            | validated  | 0.15                                | 0.10 | 6.77E-01 | 0.36        | 0.04 | 1.21E-01 | 0.12         | 0.10 | 6.51E-01 | 0.14     | 0.11 | 7.91E-01 | 0.75 | 0.14     | 8.80E-03 | 0.93 | 0.22 | 9.14E-03     | 1.04 | 0.10 | 7.54E-04     | 0.12 | 0.03 | 4.40E-01    |  |  |
| CDC25C    | No            | Yes            | No                                     | Up                        | 1.37                             | 0.00224             | 5.6E-05    | 0.80                                | 0.11 | 9.78E-03 | 0.87        | 0.04 | 3.00E-01 | 0.04         | 0.10 | 8.70E-01 | 0.86     | 0.12 | 1.23E-02 | 0.04 | 0.14     | 8.86E-01 | 0.45 | 0.20 | 3.96E-01     | 0.32 | 0.10 | 2.11E-01     | 0.22 | 0.03 | 1.72E-01    |  |  |
| DIP2C     | No            | No             | No                                     | Up                        | 1.37                             | 0.018146            | validated  | 0.12                                | 0.10 | 7.06E-01 | 0.23        | 0.04 | 2.07E-01 | 0.54         | 0.11 | 7.48E-02 | 0.32     | 0.11 | 2.88E-01 | 0.88 | 0.15     | 2.54E-02 | 0.28 | 0.20 | 3.43E-01     | 1.04 | 0.10 | 1.12E-03     | 0.20 | 0.03 | 2.16E-01    |  |  |
| FLNA      | No            | Yes            | No                                     | Up                        | 1.37                             | 0.03528             | 0.01552    | 0.96                                | 0.11 | 4.19E-03 | 0.04        | 0.04 | 8.03E-01 | 0.38         | 0.10 | 1.66E-01 | 1.07     | 0.13 | 2.75E-03 | 0.63 | 0.14     | 1.06E-01 | 0.36 | 0.20 | 4.28E-01     | 0.14 | 0.10 | 6.30E-01     | 0.03 | 0.03 | 8.69E-01    |  |  |
| ST8SIA1   | No            | No             | No                                     | Up                        | 1.37                             | 0.002337            | validated  | 0.53                                | 0.10 | 4.94E-02 | 0.37        | 0.04 | 3.90E-02 | 0.27         | 0.10 | 3.14E-01 | 0.86     | 0.12 | 6.67E-03 | 0.10 | 0.14     | 8.31E-01 | 0.25 | 0.20 | 6.34E-01     | 0.57 | 0.10 | 2.07E-01     | 0.66 | 0.03 | 1.00E-04    |  |  |
| MATN3     | No            | No             | No                                     | Up                        | 1.37                             | 0.004642            | validated  | 0.14                                | 0.10 | 5.68E-01 | 0.77        | 0.04 | 4.16E-04 | 0.14         | 0.10 | 5.52E-01 | 0.93     | 0.12 | 2.86E-03 | 0.50 | 0.14     | 5.40E-01 | 0.15 | 0.20 | 7.00E-01     | 0.56 | 0.10 | 1.24E-01     | 0.42 | 0.03 | 1.31E-02    |  |  |
| CIORF112  | No            | No             | No                                     | Up                        | 1.37                             | 0.028306            | 0.00435    | 0.39                                | 0.10 | 2.44E-01 | 0.61        | 0.04 | 4.46E-03 | 0.21         | 0.10 | 4.31E-01 | 0.86     | 0.12 | 6.22E-02 | 0.33 | 0.14     | 2.88E-01 | 0.48 | 0.21 | 2.56E-01     | 0.21 | 0.10 | 5.76E-01     | 0.53 | 0.03 | 1.71E-02    |  |  |
| PRELID2   | No            | No             | No                                     | Up                        | 1.37                             | 0.004419            | 0.01584    | 0.37                                | 0.10 | 1.58E-01 | 0.95        | 0.04 | 2.43E-05 | 0.34         | 0.10 | 3.10E-01 |          |      |          |      |          |          |      |      |              |      |      |              |      |      |             |  |  |

**Supplementary Table 2. Details for 2,053 genes differentially expressed between EEC and NEEC, identified by microarray meta-analysis.**  
 EEC - endometrioid endometrial cancer, NEEC - non-endometrioid endometrial cancer, SMD - Standardised Mean Difference, FDR - False Discovery Rate, Var - Variance

| Gene     | 145 gene list | 1253 gene list | Associated with EEC-specific survival? | Up/Down Regulated in NEEC | average standardised fold change | Microarray Meta FDR | RNAseq FDR | Individual microarray study results |      |          |             |        |          |              |      |          |          |      |          |      |          |          |      |      |              |      |      |              |      |      |             |  |  |
|----------|---------------|----------------|----------------------------------------|---------------------------|----------------------------------|---------------------|------------|-------------------------------------|------|----------|-------------|--------|----------|--------------|------|----------|----------|------|----------|------|----------|----------|------|------|--------------|------|------|--------------|------|------|-------------|--|--|
|          |               |                |                                        |                           |                                  |                     |            | TCGA                                |      |          | E-MTAB-2532 |        |          | E-GEOD-56026 |      |          | GSE32507 |      |          |      | GSE24537 |          |      |      | E-GEOD-23518 |      |      | E-GEOD-17025 |      |      | E-GEOD-2109 |  |  |
|          |               |                |                                        |                           |                                  |                     |            | SMD                                 | Var  | P-value  | SMD         | Var    | P-value  | SMD          | Var  | P-value  | SMD      | Var  | P-value  | SMD  | Var      | P-value  | SMD  | Var  | P-value      | SMD  | Var  | P-value      | SMD  | Var  | P-value     |  |  |
| RTP3     | No            | No             | No                                     | Up                        | 1.39                             | 0.027491            | validated  | 0.94                                | 0.11 | 1.52E-03 | 0.01        | 0.04   | 9.46E-01 | 0.28         | 0.10 | 5.75E-01 | 0.36     | 0.11 | 1.75E-01 | 0.58 | 0.14     | 1.03E-01 | 0.96 | 0.22 | 4.87E-01     | 0.22 | 0.10 | 6.45E-01     | 0.47 | 0.03 | 4.19E-03    |  |  |
| FKBP     | No            | No             | No                                     | Up                        | 1.39                             | 0.046232            | validated  | 0.22                                | 0.10 | 5.26E-01 | 0.82        | 0.04   | 3.20E-03 | 0.30         | 0.10 | 4.28E-01 | 0.28     | 0.11 | 5.54E-01 | 0.44 | 0.14     | 2.33E-01 | 0.63 | 0.21 | 1.24E-01     | 0.92 | 0.10 | 3.56E-02     | 0.21 | 0.03 | 1.97E-01    |  |  |
| CHST8    | No            | No             | No                                     | Up                        | 1.39                             | 0.046229            | 0.00019    | 0.08                                | 0.10 | 7.72E-01 | 0.46        | 0.04   | 7.12E-03 | 0.09         | 0.10 | 8.40E-01 | 0.93     | 0.12 | 2.44E-03 | 0.51 | 0.14     | 6.97E-01 | 0.72 | 0.21 | 6.81E-01     | 0.83 | 0.10 | 7.09E-02     | 0.19 | 0.03 | 2.14E-01    |  |  |
| CNK2     | No            | Yes            | Yes                                    | Up                        | 1.39                             | 0.025123            | 1.5E-19    | 0.74                                | 0.11 | 2.07E-02 | 0.26        | 0.04   | 3.50E-01 | 0.60         | 0.11 | 2.06E-01 | 0.67     | 0.12 | 4.92E-02 | 0.23 | 0.14     | 7.25E-01 | 0.67 | 0.21 | 2.64E-01     | 0.10 | 0.10 | 8.72E-01     | 0.54 | 0.03 | 1.25E-03    |  |  |
| KIF18A   | No            | No             | No                                     | Up                        | 1.39                             | 0.007853            | 0.00071    | 0.87                                | 0.11 | 4.67E-03 | 0.44        | 0.04   | 1.75E-02 | 0.30         | 0.10 | 2.11E-01 | 0.74     | 0.12 | 2.20E-02 | 0.29 | 0.14     | 5.25E-01 | 0.49 | 0.21 | 3.37E-01     | 0.24 | 0.10 | 3.59E-01     | 0.46 | 0.03 | 3.20E-02    |  |  |
| RAB31L1  | No            | No             | No                                     | Up                        | 1.39                             | 0.019674            | 0.0086     | 0.47                                | 0.10 | 1.21E-01 | 0.01        | 0.04   | 9.52E-01 | 0.19         | 0.10 | 6.07E-01 | 0.62     | 0.12 | 6.02E-02 | 1.14 | 0.16     | 7.75E-04 | 0.97 | 0.22 | 9.21E-03     | 0.34 | 0.10 | 4.08E-01     | 0.09 | 0.03 | 6.74E-01    |  |  |
| CLSTN3   | No            | Yes            | No                                     | Up                        | 1.39                             | 0.028034            | 0.00329    | 0.70                                | 0.11 | 1.80E-02 | 0.03        | 0.04   | 4.83E-02 | 0.89         | 0.11 | 2.56E-02 | 0.69     | 0.12 | 8.20E-01 | 0.27 | 0.14     | 4.18E-01 | 0.23 | 0.20 | 4.81E-01     | 0.80 | 0.10 | 6.42E-02     | 0.42 | 0.03 | 8.74E-02    |  |  |
| PTP4A2   | No            | Yes            | No                                     | Up                        | 1.39                             | 0.018032            | 0.00509    | 1.41                                | 0.12 | 1.41E-03 | 0.03        | 0.04   | 8.31E-01 | 0.27         | 0.10 | 4.22E-01 | 0.82     | 0.12 | 3.35E-02 | 0.85 | 0.15     | 3.04E-03 | 0.17 | 0.20 | 4.09E-01     | 0.21 | 0.10 | 4.15E-01     | 0.07 | 0.03 | 7.60E-01    |  |  |
| TMEM147  | No            | Yes            | No                                     | Up                        | 1.39                             | 0.022841            | 0.01813    | 1.26                                | 0.12 | 2.91E-03 | 0.39        | 0.04   | 8.15E-02 | 0.21         | 0.10 | 5.44E-01 | 0.22     | 0.11 | 6.04E-01 | 0.39 | 0.14     | 9.30E-02 | 0.63 | 0.21 | 3.95E-02     | 0.47 | 0.10 | 1.20E-01     | 0.28 | 0.03 | 3.44E-01    |  |  |
| TBC1D13  | No            | No             | No                                     | Up                        | 1.40                             | 0.03159             | validated  | 0.72                                | 0.11 | 4.39E-02 | 0.45        | 0.04   | 6.12E-02 | 0.16         | 0.10 | 6.61E-01 | 0.45     | 0.12 | 3.37E-01 | 0.59 | 0.14     | 1.18E-01 | 0.28 | 0.20 | 3.91E-01     | 0.73 | 0.10 | 1.09E-01     | 0.45 | 0.03 | 9.38E-03    |  |  |
| RG59     | No            | Yes            | No                                     | Up                        | 1.40                             | 0.033048            | 1.5E-19    | 0.78                                | 0.11 | 6.74E-03 | 0.49        | 0.04   | 1.54E-02 | 0.55         | 0.11 | 2.99E-01 | 0.35     | 0.11 | 1.54E-01 | 0.29 | 0.14     | 8.58E-01 | 0.40 | 0.20 | 7.45E-01     | 0.68 | 0.10 | 3.07E-01     | 0.33 | 0.03 | 3.38E-02    |  |  |
| PRUNE    | No            | Yes            | No                                     | Up                        | 1.40                             | 0.046377            | 0.02585    | 0.63                                | 0.10 | 6.05E-02 | 0.12        | 0.04   | 5.55E-01 | 0.29         | 0.10 | 3.63E-01 | 0.52     | 0.12 | 1.60E-01 | 1.07 | 0.15     | 2.05E-02 | 0.46 | 0.21 | 1.33E-01     | 0.56 | 0.10 | 6.29E-02     | 0.22 | 0.03 | 2.43E-01    |  |  |
| TNN3     | No            | Yes            | No                                     | Up                        | 1.40                             | 3.97E-05            | 1.5E-19    | 0.81                                | 0.11 | 2.94E-03 | 0.95        | 0.04   | 6.82E-07 | 0.39         | 0.10 | 1.10E-01 | 0.30     | 0.11 | 2.24E-01 | 0.39 | 0.14     | 3.30E-01 | 0.20 | 0.20 | 5.50E-01     | 0.25 | 0.10 | 3.73E-01     | 0.57 | 0.03 | 2.98E-03    |  |  |
| EPHA4    | No            | No             | No                                     | Up                        | 1.40                             | 0.00168             | 0.00558    | 0.68                                | 0.11 | 6.75E-03 | 0.08        | 0.04   | 5.63E-01 | 0.43         | 0.10 | 6.10E-02 | 1.01     | 0.13 | 1.50E-03 | 0.86 | 0.15     | 4.06E-02 | 0.40 | 0.20 | 2.64E-01     | 0.01 | 0.10 | 9.67E-01     | 0.41 | 0.03 | 5.84E-03    |  |  |
| CYIFP2   | No            | Yes            | Yes                                    | Up                        | 1.40                             | 0.000754            | 0.00021    | 0.51                                | 0.10 | 6.44E-02 | 0.75        | 0.04   | 1.89E-04 | 0.52         | 0.11 | 5.16E-02 | 0.33     | 0.11 | 2.95E-01 | 0.79 | 0.15     | 1.15E-02 | 0.06 | 0.20 | 7.39E-01     | 0.54 | 0.10 | 4.11E-02     | 0.38 | 0.03 | 5.24E-02    |  |  |
| TLE4     | No            | No             | No                                     | Up                        | 1.40                             | 0.003843            | 0.00092    | 0.37                                | 0.10 | 1.90E-01 | 0.38        | 0.04   | 1.78E-02 | 0.44         | 0.10 | 7.95E-02 | 0.82     | 0.12 | 1.04E-02 | 0.85 | 0.15     | 1.46E-02 | 0.46 | 0.21 | 2.04E-01     | 0.26 | 0.10 | 2.55E-01     | 0.30 | 0.03 | 6.94E-02    |  |  |
| PROK2    | No            | No             | No                                     | Up                        | 1.40                             | 0.000148            | 0.00138    | 0.48                                | 0.10 | 5.58E-02 | 0.91        | 0.04   | 2.50E-06 | 0.26         | 0.10 | 2.56E-01 | 0.36     | 0.11 | 1.19E-01 | 0.04 | 0.14     | 7.24E-01 | 0.61 | 0.21 | 6.00E-02     | 0.98 | 0.10 | 8.09E-03     | 0.24 | 0.03 | 7.86E-02    |  |  |
| WDR5     | No            | No             | No                                     | Up                        | 1.40                             | 0.008703            | validated  | 0.86                                | 0.11 | 1.37E-02 | 0.65        | 0.04   | 6.25E-03 | 0.52         | 0.11 | 9.75E-02 | 0.13     | 0.12 | 9.19E-02 | 0.13 | 0.14     | 5.09E-01 | 0.09 | 0.20 | 6.96E-01     | 0.44 | 0.10 | 1.76E-01     | 0.52 | 0.03 | 2.12E-02    |  |  |
| SERPINC1 | No            | Yes            | No                                     | Up                        | 1.40                             | 0.002944            | 0.00103    | 0.57                                | 0.10 | 4.70E-02 | 0.18        | 0.04   | 2.18E-01 | 0.15         | 0.10 | 5.34E-01 | 0.20     | 0.11 | 4.43E-01 | 1.45 | 0.17     | 7.22E-05 | 0.70 | 0.21 | 3.04E-02     | 0.47 | 0.10 | 5.47E-02     | 0.20 | 0.03 | 2.66E-01    |  |  |
| GALT     | No            | Yes            | No                                     | Up                        | 1.41                             | 0.037595            | 0.01065    | 0.51                                | 0.10 | 1.67E-01 | 0.36        | 0.04   | 9.57E-02 | 0.23         | 0.10 | 5.35E-01 | 0.20     | 0.11 | 6.60E-01 | 1.55 | 0.17     | 1.13E-03 | 0.42 | 0.20 | 2.13E-01     | 0.43 | 0.10 | 2.30E-01     | 0.24 | 0.03 | 1.45E-01    |  |  |
| PLSCR4   | No            | No             | No                                     | Up                        | 1.41                             | 0.003764            | 0.00482    | 0.39                                | 0.10 | 1.46E-01 | 0.12        | 0.04   | 4.05E-01 | 0.11         | 0.10 | 6.09E-01 | 0.92     | 0.12 | 3.23E-03 | 1.14 | 0.16     | 2.08E-03 | 0.49 | 0.21 | 1.28E-01     | 0.30 | 0.10 | 2.15E-01     | 0.46 | 0.03 | 2.94E-02    |  |  |
| NMT2     | No            | Yes            | No                                     | Up                        | 1.41                             | 0.009399            | 0.00189    | 0.46                                | 0.10 | 1.20E-01 | 0.29        | 0.04   | 1.16E-01 | 0.67         | 0.11 | 2.19E-02 | 1.10     | 0.13 | 2.34E-03 | 0.39 | 0.14     | 1.97E-01 | 0.30 | 0.20 | 3.63E-01     | 0.43 | 0.10 | 1.02E-01     | 0.31 | 0.03 | 1.73E-01    |  |  |
| ACVR2A   | No            | No             | No                                     | Up                        | 1.41                             | 0.008008            | 0.04867    | 0.77                                | 0.11 | 8.35E-03 | 0.42        | 0.04   | 3.46E-02 | 0.26         | 0.10 | 3.70E-01 | 0.84     | 0.12 | 1.55E-02 | 0.18 | 0.14     | 6.22E-01 | 0.41 | 0.20 | 4.42E-01     | 0.37 | 0.10 | 2.43E-01     | 0.69 | 0.03 | 7.35E-03    |  |  |
| DISP2    | No            | No             | No                                     | Up                        | 1.41                             | 0.003756            | validated  | 0.08                                | 0.10 | 7.60E-01 | 0.75        | 0.04   | 1.79E-04 | 0.48         | 0.10 | 2.07E-01 | 0.84     | 0.12 | 6.56E-03 | 0.61 | 0.14     | 4.46E-01 | 0.65 | 0.21 | 4.40E-01     | 0.47 | 0.10 | 8.80E-01     | 0.47 | 0.03 | 4.38E-03    |  |  |
| SYT12    | No            | Yes            | No                                     | Up                        | 1.41                             | 0.017235            | 6.7E-06    | 1.14                                | 0.11 | 4.77E-03 | 0.46        | 0.04   | 6.39E-03 | 0.65         | 0.11 | 6.46E-02 | 0.43     | 0.12 | 8.14E-02 | 0.46 | 0.14     | 4.57E-01 | 0.33 | 0.20 | 5.65E-01     | 0.35 | 0.10 | 3.55E-01     | 0.14 | 0.03 | 3.95E-01    |  |  |
| MXRAS    | No            | Yes            | No                                     | Up                        | 1.41                             | 0.000415            | 0.00107    | 0.67                                | 0.11 | 9.00E-03 | 0.43        | 0.04   | 1.08E-02 | 0.02         | 0.10 | 9.36E-01 | 1.25     | 0.13 | 2.84E-04 | 0.33 | 0.14     | 1.43E-01 | 0.65 | 0.21 | 3.58E-02     | 0.14 | 0.10 | 5.06E-01     | 0.46 | 0.03 | 1.34E-02    |  |  |
| HOXD13   | No            | No             | No                                     | Up                        | 1.41                             | 0.001088            | validated  | 0.20                                | 0.10 | 4.31E-01 | 0.79        | 0.04   | 4.47E-03 | 0.18         | 0.10 | 6.99E-01 | 0.30     | 0.11 | 2.90E-01 | 0.24 | 0.14     | 5.83E-01 | 0.65 | 0.21 | 2.24E-01     | 0.79 | 0.10 | 5.09E-02     | 0.81 | 0.03 | 3.18E-06    |  |  |
| SIVA1    | No            | No             | No                                     | Up                        | 1.41                             | 0.037667            | validated  | 0.34                                | 0.10 | 3.77E-01 | 0.33        | 0.04   | 5.1E-01  | 0.77         | 0.11 | 3.53E-02 | 0.66     | 0.12 | 1.34E-01 | 0.52 | 0.14     | 6.85E-02 | 0.73 | 0.21 | 3.51E-02     | 0.50 | 0.10 | 1.16E-01     | 0.10 | 0.03 | 6.11E-01    |  |  |
| NIPBL    | No            | Yes            | No                                     | Up                        | 1.41                             | 0.002278            | 0.01959    | 0.94                                | 0.11 | 1.69E-02 | 0.63        | 0.04   | 1.57E-04 | 0.49         | 0.10 | 1.13E-01 | 0.07     | 0.11 | 8.21E-01 | 0.35 | 0.14     | 2.15E-01 | 0.67 | 0.21 | 8.16E-02     | 0.65 | 0.10 | 5.79E-03     | 0.16 | 0.03 | 4.58E-01    |  |  |
| RPA2     | No            | No             | No                                     | Up                        | 1.41                             | 0.040057            | validated  | 0.04                                | 0.10 | 9.11E-01 | 0.41        | 0.04   | 6.66E-02 | 0.56         | 0.11 | 1.13E-01 | 1.03     | 0.13 | 4.68E-02 | 0.42 | 0.14     | 1.16E-01 | 0.38 | 0.20 | 1.83E-01     | 0.31 | 0.10 | 2.49E-01     | 0.81 | 0.03 | 3.19E-02    |  |  |
| ACACB    | No            | Yes            | No                                     | Up                        | 1.41                             | 0.002071            | 0.00012    | 0.96                                | 0.11 | 4.04E-03 | 0.48        | 0.04   | 3.84E-02 | 0.32         | 0.10 | 2.05E-01 | 0.69     | 0.12 | 2.50E-02 | 0.70 | 0.14     | 1.56E-02 | 0.09 | 0.20 | 6.10E-01     | 0.35 | 0.10 | 1.32E-01     | 0.36 | 0.03 | 3.25E-02    |  |  |
| RHCE     | No            | No             | No                                     | Up                        | 1.41                             | 0.011716            | 0.03619    | 0.72                                | 0.11 | 1.67E-02 | 0.19        | 0.04   | 3.17E-01 | 0.03         | 0.10 | 9.42E-01 | 0.67     | 0.12 | 2.42E-02 | 0.18 | 0.14     | 8.29E-01 | 0.46 | 0.21 | 6.66E-01     | 1.15 | 0.10 | 2.34E-02     | 0.57 | 0.03 | 1.41E-03    |  |  |
| LYAR     | No            | No             | No                                     | Up                        | 1.41                             | 0.004836            | 0.00527    | 0.69                                | 0.11 | 7.18E-02 | 0.82        | 0.04   | 5.80E-04 | 0.62         | 0.11 | 4.83E-02 | 0.20     | 0.11 | 6.30E-01 | 0.62 | 0.14     | 6.56E-02 | 0.00 | 0.20 | 9.80E-01     | 0.37 | 0.10 | 1.86E-01     | 0.64 | 0.03 | 1.66E-02    |  |  |
| PER3     | No            | Yes            | No                                     | Up                        | 1.41                             | 0.011403            | 9.5E-05    | 0.29                                | 0.10 | 3.36E-01 | 0.05        | 0.04   | 7.23E-01 | 1.32         | 0.12 | 1.57E-04 | 0.27     | 0.11 | 3.25E-01 | 0.80 | 0.15     | 4.90E-02 | 0.60 | 0.21 | 1.66E-01     | 0.56 | 0.10 | 3.53E-02     | 0.08 | 0.03 | 5.77E-01    |  |  |
| TIMM8A   | No            | No             | Yes                                    | Up                        | 1.41                             | 0.008244            | 0.00552    | 1.31                                | 0.12 | 1.36E-03 | 0.96        | 0.04   | 1.45E-04 | 0.45         | 0.10 | 1.70E-01 | 0.24     | 0.11 | 5.43E-01 | 0.09 | 0.14     | 7.92E-01 | 0.53 | 0.21 | 4.26E-01     | 0.26 | 0.10 | 2.88E-01     | 0.13 | 0.03 | 5.03E-01    |  |  |
| SLC45A4  | No            | Yes            | No                                     | Up                        | 1.41                             | 0.004775            | 2.6E-05    | 1.33                                | 0.12 | 1.11E-04 | 0.05        | 0.04   | 7.25E-01 | 0.43         | 0.10 | 1.66E-01 | 0.41     | 0.12 | 7.73E-02 | 0.43 | 0.14     | 2.04E-01 | 0.24 | 0.20 | 4.60E-01     | 1.04 | 0.10 | 2.90E-03     | 0.04 | 0.03 | 8.69E-01    |  |  |
| STAMBP   | No            | No             | No                                     | Up                        | 1.41                             | 0.035594            | 0.03249    | 0.52                                | 0.10 | 1.87E-01 | 0.33        | 0.04   | 1.61E-01 | 0.59         | 0.11 | 8.60E-02 | 0.76     | 0.12 | 1.17E-01 | 0.16 | 0.14     | 4.13E-01 | 0.70 | 0.21 | 5.06E-02     | 1.01 | 0.10 | 3.09E-01     | 0.60 | 0.03 | 2.00E-02    |  |  |
| TCEB1    | No            | No             | No                                     | Up                        | 1.41                             | 0.014023            | validated  | 1.28                                | 0.12 | 4.63E-03 | 0.31        | 0.04</ |          |              |      |          |          |      |          |      |          |          |      |      |              |      |      |              |      |      |             |  |  |

**Supplementary Table 2. Details for 2,053 genes differentially expressed between EEC and NEEC, identified by microarray meta-analysis.**  
 EEC - endometrioid endometrial cancer, NEEC - non-endometrioid endometrial cancer, SMD - Standardised Mean Difference, FDR - False Discovery Rate, Var - Variance

| Gene     | 145 gene list | 1253 gene list | Associated with EEC-specific survival? | Up/Down Regulated in NEEC | average standardised fold change | Microarray Meta FDR | RNAseq FDR | Individual microarray study results |      |          |             |      |          |              |      |          |          |      |          |          |      |          |              |      |          |              |      |          |             |      |          |
|----------|---------------|----------------|----------------------------------------|---------------------------|----------------------------------|---------------------|------------|-------------------------------------|------|----------|-------------|------|----------|--------------|------|----------|----------|------|----------|----------|------|----------|--------------|------|----------|--------------|------|----------|-------------|------|----------|
|          |               |                |                                        |                           |                                  |                     |            | TCGA                                |      |          | E-MTAB-2532 |      |          | E-GEOD-56026 |      |          | GSE32507 |      |          | GSE24537 |      |          | E-GEOD-23518 |      |          | E-GEOD-17025 |      |          | E-GEOD-2109 |      |          |
|          |               |                |                                        |                           |                                  |                     |            | SMD                                 | Var  | P-value  | SMD         | Var  | P-value  | SMD          | Var  | P-value  | SMD      | Var  | P-value  | SMD      | Var  | P-value  | SMD          | Var  | P-value  | SMD          | Var  | P-value  | SMD         | Var  | P-value  |
| CKK      | No            | Yes            | No                                     | Up                        | 1.42                             | 0.001209            | 1.5E-19    | 0.79                                | 0.11 | 2.51E-03 | 0.80        | 0.04 | 2.66E-04 | 0.56         | 0.11 | 2.79E-01 | 0.69     | 0.12 | 6.85E-03 | 0.25     | 0.14 | 5.65E-01 | 0.40         | 0.20 | 7.32E-01 | 0.26         | 0.10 | 6.43E-01 | 0.34        | 0.03 | 3.14E-02 |
| SOHLH1   | No            | Yes            | No                                     | Up                        | 1.42                             | 0.00072             | 1.5E-19    | 0.76                                | 0.11 | 7.19E-03 | 0.78        | 0.04 | 1.11E-04 | 0.50         | 0.10 | 3.43E-01 | 0.22     | 0.11 | 3.42E-01 | 0.03     | 0.14 | 9.79E-01 | 0.27         | 0.20 | 8.43E-01 | 0.95         | 0.10 | 2.76E-02 | 0.57        | 0.03 | 1.41E-03 |
| C21ORF91 | No            | No             | No                                     | Up                        | 1.42                             | 0.020762            | validated  | 1.46                                | 0.12 | 3.67E-04 | 0.20        | 0.04 | 3.62E-01 | 0.59         | 0.11 | 4.65E-02 | 0.95     | 0.12 | 3.01E-02 | 0.23     | 0.14 | 5.97E-01 | 0.17         | 0.20 | 7.12E-01 | 0.36         | 0.10 | 2.05E-01 | 0.11        | 0.03 | 5.82E-01 |
| NEIL3    | No            | No             | No                                     | Up                        | 1.42                             | 0.008869            | 0.00062    | 0.06                                | 0.10 | 8.32E-01 | 0.67        | 0.04 | 4.96E-03 | 0.25         | 0.10 | 3.29E-01 | 0.68     | 0.12 | 3.12E-02 | 0.71     | 0.14 | 1.87E-01 | 0.47         | 0.21 | 3.57E-01 | 0.61         | 0.10 | 4.52E-02 | 0.65        | 0.03 | 8.34E-03 |
| AQP11    | No            | No             | No                                     | Up                        | 1.43                             | 0.047412            | 0.02418    | 0.62                                | 0.10 | 5.78E-02 | 0.38        | 0.04 | 1.72E-01 | 0.54         | 0.11 | 1.70E-01 | 0.84     | 0.12 | 1.68E-02 | 0.40     | 0.14 | 3.59E-01 | 0.60         | 0.21 | 2.95E-01 | 0.49         | 0.10 | 1.58E-01 | 0.23        | 0.03 | 1.85E-01 |
| CDK2     | No            | Yes            | No                                     | Up                        | 1.43                             | 0.018986            | 0.01499    | 0.82                                | 0.11 | 1.47E-02 | 0.44        | 0.04 | 5.02E-02 | 0.71         | 0.11 | 2.82E-02 | 1.20     | 0.13 | 1.84E-02 | 0.15     | 0.14 | 4.33E-01 | 0.60         | 0.21 | 8.83E-02 | 0.14         | 0.10 | 5.83E-01 | 0.02        | 0.03 | 8.73E-01 |
| ATP1B2   | No            | No             | No                                     | Up                        | 1.43                             | 0.021107            | validated  | 0.72                                | 0.11 | 9.19E-02 | 0.37        | 0.04 | 1.95E-02 | 0.29         | 0.10 | 3.73E-01 | 0.58     | 0.12 | 3.73E-02 | 0.95     | 0.15 | 3.66E-02 | 0.23         | 0.20 | 4.94E-01 | 0.75         | 0.10 | 8.35E-02 | 0.20        | 0.03 | 2.62E-01 |
| SLIT3    | No            | No             | No                                     | Up                        | 1.43                             | 0.001712            | validated  | 0.30                                | 0.10 | 2.23E-01 | 0.19        | 0.04 | 1.82E-01 | 0.10         | 0.10 | 6.94E-01 | 0.27     | 0.11 | 2.73E-01 | 1.51     | 0.17 | 2.35E-04 | 0.74         | 0.21 | 3.59E-02 | 0.41         | 0.10 | 2.97E-01 | 0.58        | 0.03 | 1.12E-03 |
| F7       | No            | No             | No                                     | Up                        | 1.43                             | 0.008568            | validated  | 0.79                                | 0.11 | 2.66E-02 | 0.81        | 0.04 | 1.39E-04 | 0.37         | 0.10 | 3.68E-01 | 0.83     | 0.12 | 8.50E-03 | 0.04     | 0.14 | 9.72E-01 | 0.74         | 0.21 | 5.59E-01 | 0.45         | 0.10 | 2.58E-01 | 0.08        | 0.03 | 6.03E-01 |
| EPYC     | No            | No             | No                                     | Up                        | 1.43                             | 0.001953            | validated  | 0.86                                | 0.11 | 1.52E-02 | 0.64        | 0.04 | 1.88E-02 | 0.57         | 0.11 | 1.33E-02 | 0.24     | 0.11 | 4.55E-01 | 0.72     | 0.14 | 1.86E-01 | 0.41         | 0.20 | 1.62E-01 | 0.17         | 0.10 | 6.55E-01 | 0.49        | 0.03 | 8.22E-04 |
| SRM      | No            | No             | No                                     | Up                        | 1.43                             | 0.006602            | validated  | 0.33                                | 0.10 | 3.67E-01 | 0.52        | 0.04 | 1.60E-02 | 0.26         | 0.10 | 4.10E-01 | 0.92     | 0.12 | 2.61E-02 | 0.70     | 0.14 | 1.79E-02 | 0.04         | 0.20 | 8.17E-01 | 0.70         | 0.10 | 3.16E-02 | 0.64        | 0.03 | 1.80E-02 |
| ECH1     | No            | No             | No                                     | Up                        | 1.43                             | 0.011776            | validated  | 0.42                                | 0.10 | 3.16E-01 | 0.06        | 0.04 | 7.04E-01 | 0.05         | 0.10 | 8.68E-01 | 1.24     | 0.13 | 4.63E-03 | 1.10     | 0.15 | 6.93E-04 | 0.66         | 0.21 | 3.72E-02 | 0.30         | 0.10 | 2.93E-01 | 0.28        | 0.03 | 3.26E-01 |
| ST3GALS5 | No            | No             | No                                     | Up                        | 1.43                             | 0.010936            | validated  | 0.10                                | 0.10 | 6.98E-01 | 0.23        | 0.04 | 1.99E-01 | 0.62         | 0.11 | 2.79E-02 | 0.42     | 0.12 | 1.58E-01 | 0.92     | 0.15 | 9.51E-03 | 1.36         | 0.25 | 4.94E-03 | 0.14         | 0.10 | 5.44E-01 | 0.32        | 0.03 | 1.19E-01 |
| DBN1     | No            | Yes            | No                                     | Up                        | 1.43                             | 0.004883            | 0.0278     | 0.10                                | 0.10 | 7.53E-01 | 0.79        | 0.04 | 5.48E-04 | 0.45         | 0.10 | 1.82E-01 | 1.13     | 0.13 | 2.02E-02 | 0.47     | 0.14 | 5.86E-02 | 0.59         | 0.21 | 5.94E-02 | 0.28         | 0.10 | 3.49E-01 | 0.32        | 0.03 | 1.40E-01 |
| LPIN2    | No            | Yes            | No                                     | Up                        | 1.43                             | 0.016965            | 0.00063    | 0.83                                | 0.11 | 4.87E-02 | 0.56        | 0.04 | 1.53E-02 | 0.63         | 0.11 | 3.36E-02 | 0.06     | 0.11 | 8.44E-01 | 0.55     | 0.14 | 1.21E-01 | 0.42         | 0.20 | 2.88E-01 | 0.49         | 0.10 | 1.25E-01 | 0.57        | 0.03 | 6.04E-02 |
| DGUOK    | No            | No             | No                                     | Up                        | 1.43                             | 0.009012            | validated  | 1.04                                | 0.11 | 2.88E-02 | 0.68        | 0.04 | 6.38E-03 | 0.37         | 0.10 | 2.63E-01 | 0.57     | 0.12 | 3.12E-01 | 0.01     | 0.14 | 9.04E-01 | 0.87         | 0.22 | 1.06E-02 | 0.10         | 0.10 | 7.04E-01 | 0.49        | 0.03 | 1.09E-02 |
| TACC3    | No            | Yes            | No                                     | Up                        | 1.43                             | 0.000889            | 3E-05      | 0.78                                | 0.11 | 8.64E-03 | 0.91        | 0.04 | 2.20E-05 | 0.40         | 0.10 | 1.54E-01 | 0.44     | 0.12 | 1.90E-01 | 0.63     | 0.14 | 1.52E-01 | 0.54         | 0.21 | 2.07E-01 | 0.07         | 0.10 | 7.88E-01 | 0.36        | 0.03 | 3.72E-02 |
| EHD3     | No            | Yes            | No                                     | Up                        | 1.43                             | 0.028751            | 0.00182    | 0.91                                | 0.11 | 9.05E-03 | 0.26        | 0.04 | 1.06E-01 | 0.34         | 0.10 | 2.13E-01 | 0.19     | 0.11 | 5.36E-01 | 0.38     | 0.14 | 6.73E-01 | 1.00         | 0.22 | 4.13E-01 | 0.66         | 0.10 | 2.96E-02 | 0.40        | 0.03 | 1.56E-02 |
| OLFM2    | No            | Yes            | No                                     | Up                        | 1.43                             | 0.008773            | 1.5E-19    | 0.16                                | 0.10 | 6.59E-01 | 0.93        | 0.04 | 2.31E-04 | 0.13         | 0.10 | 7.78E-01 | 0.45     | 0.12 | 1.52E-01 | 0.43     | 0.14 | 2.11E-01 | 0.40         | 0.20 | 2.58E-01 | 1.26         | 0.10 | 5.94E-02 | 0.38        | 0.03 | 3.16E-02 |
| STX16    | No            | Yes            | No                                     | Up                        | 1.43                             | 0.00632             | 0.04171    | 0.84                                | 0.11 | 4.50E-02 | 0.46        | 0.04 | 2.03E-02 | 0.99         | 0.11 | 3.50E-03 | 0.03     | 0.11 | 9.19E-01 | 0.40     | 0.14 | 1.10E-01 | 0.88         | 0.22 | 1.45E-02 | 0.50         | 0.10 | 1.20E-01 | 0.03        | 0.03 | 8.49E-01 |
| DDIT3    | No            | No             | No                                     | Up                        | 1.43                             | 0.008351            | validated  | 0.72                                | 0.11 | 1.42E-02 | 0.17        | 0.04 | 3.42E-01 | 0.68         | 0.11 | 3.40E-02 | 0.36     | 0.11 | 2.47E-01 | 0.78     | 0.15 | 1.77E-02 | 0.43         | 0.20 | 2.04E-01 | 0.45         | 0.10 | 1.74E-01 | 0.55        | 0.03 | 3.60E-02 |
| TCEAL2   | No            | No             | No                                     | Up                        | 1.43                             | 0.000125            | validated  | 0.53                                | 0.10 | 2.04E-02 | 0.17        | 0.04 | 1.91E-01 | 0.49         | 0.10 | 3.24E-02 | 0.58     | 0.12 | 4.63E-02 | 1.13     | 0.16 | 4.21E-04 | 0.64         | 0.21 | 3.98E-02 | 0.12         | 0.10 | 5.43E-01 | 0.48        | 0.03 | 1.82E-03 |
| TPM4     | No            | No             | No                                     | Up                        | 1.43                             | 0.000121            | validated  | 0.69                                | 0.11 | 3.54E-02 | 1.07        | 0.04 | 1.14E-06 | 0.59         | 0.11 | 4.40E-02 | 0.40     | 0.12 | 1.65E-01 | 0.20     | 0.14 | 3.45E-01 | 0.48         | 0.21 | 1.28E-01 | 0.61         | 0.10 | 1.15E-02 | 0.11        | 0.03 | 5.76E-01 |
| PHF19    | No            | No             | No                                     | Up                        | 1.43                             | 0.003812            | 0.04551    | 0.52                                | 0.10 | 1.35E-01 | 0.64        | 0.04 | 1.37E-03 | 0.48         | 0.10 | 9.64E-02 | 0.63     | 0.10 | 5.66E-02 | 0.31     | 0.14 | 4.62E-01 | 0.53         | 0.21 | 2.59E-01 | 0.61         | 0.10 | 5.27E-02 | 0.43        | 0.03 | 2.28E-02 |
| EID2     | No            | No             | No                                     | Up                        | 1.43                             | 0.031414            | 0.01724    | 0.14                                | 0.10 | 6.56E-01 | 0.44        | 0.04 | 4.10E-02 | 0.42         | 0.10 | 2.71E-01 | 0.81     | 0.12 | 5.48E-02 | 0.49     | 0.14 | 1.33E-01 | 0.89         | 0.22 | 3.78E-02 | 0.44         | 0.10 | 1.37E-01 | 0.52        | 0.03 | 1.01E-01 |
| FAM127B  | No            | No             | No                                     | Up                        | 1.43                             | 0.011932            | validated  | 1.03                                | 0.11 | 7.11E-03 | 0.30        | 0.04 | 1.64E-01 | 0.46         | 0.10 | 2.02E-01 | 0.24     | 0.11 | 5.57E-01 | 0.80     | 0.15 | 9.09E-03 | 0.18         | 0.20 | 4.17E-01 | 0.95         | 0.10 | 1.22E-02 | 0.18        | 0.03 | 3.75E-01 |
| ASB1     | No            | No             | No                                     | Up                        | 1.43                             | 0.01236             | 0.01496    | 1.12                                | 0.11 | 9.08E-03 | 0.61        | 0.04 | 6.50E-03 | 0.56         | 0.11 | 8.49E-02 | 0.81     | 0.12 | 4.19E-02 | 0.28     | 0.14 | 3.53E-01 | 0.35         | 0.20 | 3.59E-01 | 0.20         | 0.10 | 5.69E-01 | 0.23        | 0.03 | 1.65E-01 |
| CHSY1    | No            | No             | No                                     | Up                        | 1.43                             | 0.008311            | validated  | 0.04                                | 0.10 | 8.94E-01 | 0.63        | 0.04 | 7.05E-03 | 0.72         | 0.11 | 7.13E-02 | 0.98     | 0.13 | 2.91E-02 | 0.08     | 0.14 | 5.79E-01 | 0.56         | 0.21 | 7.23E-02 | 0.48         | 0.10 | 1.47E-01 | 0.67        | 0.03 | 1.13E-02 |
| PIGX     | No            | No             | Yes                                    | Up                        | 1.43                             | 0.002421            | 0.01481    | 0.57                                | 0.10 | 8.37E-02 | 0.37        | 0.04 | 4.41E-02 | 0.81         | 0.11 | 7.65E-03 | 1.06     | 0.13 | 8.01E-03 | 0.10     | 0.14 | 7.27E-01 | 0.13         | 0.20 | 7.21E-01 | 0.85         | 0.10 | 6.92E-03 | 0.29        | 0.03 | 5.87E-02 |
| CFL2     | No            | No             | No                                     | Up                        | 1.44                             | 0.015804            | validated  | 0.27                                | 0.10 | 3.88E-01 | 0.27        | 0.04 | 1.13E-01 | 0.47         | 0.10 | 7.17E-02 | 0.93     | 0.12 | 3.95E-03 | 0.39     | 0.14 | 5.69E-01 | 0.98         | 0.22 | 3.78E-01 | 0.28         | 0.10 | 2.64E-01 | 0.58        | 0.03 | 6.58E-03 |
| PSTK     | No            | Yes            | No                                     | Up                        | 1.44                             | 0.003269            | 4.2E-05    | 0.98                                | 0.11 | 4.51E-03 | 0.42        | 0.04 | 6.22E-02 | 1.00         | 0.11 | 4.30E-03 | 0.18     | 0.11 | 6.36E-01 | 0.25     | 0.14 | 5.51E-01 | 0.23         | 0.20 | 6.79E-01 | 0.61         | 0.10 | 6.80E-02 | 0.50        | 0.03 | 5.24E-03 |
| RECQL4   | No            | Yes            | No                                     | Up                        | 1.44                             | 1.14E-05            | 0.00411    | 0.81                                | 0.11 | 8.35E-03 | 0.96        | 0.04 | 2.50E-06 | 0.00         | 0.10 | 9.96E-01 | 0.30     | 0.12 | 2.34E-01 | 0.45     | 0.14 | 1.84E-01 | 0.19         | 0.20 | 5.70E-01 | 0.68         | 0.10 | 3.10E-02 | 0.69        | 0.03 | 3.98E-05 |
| STAU1    | No            | No             | No                                     | Up                        | 1.44                             | 0.025215            | 0.01379    | 0.59                                | 0.10 | 1.12E-01 | 0.44        | 0.04 | 5.88E-02 | 1.36         | 0.12 | 2.49E-03 | 0.85     | 0.12 | 2.20E-01 | 0.00     | 0.14 | 9.95E-01 | 0.29         | 0.20 | 2.41E-01 | 0.58         | 0.10 | 4.14E-02 | 0.68        | 0.03 | 7.93E-01 |
| DYNLRB1  | No            | No             | No                                     | Up                        | 1.44                             | 0.012223            | validated  | 1.20                                | 0.11 | 1.43E-02 | 0.58        | 0.04 | 2.26E-02 | 0.57         | 0.11 | 1.21E-01 | 0.07     | 0.11 | 8.34E-01 | 0.30     | 0.14 | 1.83E-01 | 0.51         | 0.21 | 8.32E-02 | 0.64         | 0.10 | 8.32E-02 | 0.31        | 0.03 | 5.80E-02 |
| ENOX1    | No            | No             | No                                     | Up                        | 1.44                             | 0.000177            | 0.01891    | 0.09                                | 0.10 | 7.37E-01 | 0.64        | 0.04 | 1.88E-03 | 0.24         | 0.10 | 3.71E-01 | 1.48     | 0.14 | 1.61E-05 | 0.18     | 0.14 | 8.60E-01 | 0.00         | 0.20 | 9.99E-01 | 0.62         | 0.10 | 1.29E-01 | 0.93        | 0.03 | 2.08E-04 |
| PTGS1    | No            | Yes            | No                                     | Up                        | 1.44                             | 9.98E-05            | 1.5E-19    | 0.90                                | 0.11 | 4.31E-04 | 0.27        | 0.04 | 5.65E-02 | 0.34         | 0.10 | 1.28E-01 | 0.26     | 0.11 | 3.29E-01 | 0.59     | 0.14 | 2.76E-02 | 0.60         | 0.21 | 7.61E-02 | 0.92         | 0.10 | 6.68E-04 | 0.32        | 0.03 | 3.86E-02 |
| MELK     | No            | Yes            | No                                     | Up                        | 1.44                             | 0.000127            | 0.00371    | 0.47                                | 0.10 | 1.09E-01 | 0.62        | 0.04 | 6.70E-04 | 0.27         | 0.10 | 2.55E-01 | 0.43     | 0.12 | 1.29E-01 | 0.67     | 0.14 | 2.14E-02 | 0.31         | 0.20 | 2.45E-01 | 0.95         | 0.10 | 2.45E-04 | 0.47        | 0.03 | 9.59E-03 |
| STXBP1   | No            | No             | No                                     | Up                        | 1.44                             | 0.006571            | 0.00618    | 0.20                                | 0.10 | 5.65E-01 | 0.31        | 0.04 | 1.10E-01 | 0.45         | 0.10 | 8.09E-02 | 1.0      |      |          |          |      |          |              |      |          |              |      |          |             |      |          |

**Supplementary Table 2. Details for 2,053 genes differentially expressed between EEC and NEEC, identified by microarray meta-analysis.**  
 EEC - endometrioid endometrial cancer, NEEC - non-endometrioid endometrial cancer, SMD - Standardised Mean Difference, FDR - False Discovery Rate, Var - Variance

| Gene      | 145 gene list | 1253 gene list | Associated with EEC-specific survival? | Up/Down Regulated in NEEC | average standardised fold change | Microarray Meta FDR | RNAseq FDR | Individual microarray study results |      |          |             |      |          |              |      |          |          |      |          |      |          |          |      |      |              |      |      |              |      |      |             |  |  |
|-----------|---------------|----------------|----------------------------------------|---------------------------|----------------------------------|---------------------|------------|-------------------------------------|------|----------|-------------|------|----------|--------------|------|----------|----------|------|----------|------|----------|----------|------|------|--------------|------|------|--------------|------|------|-------------|--|--|
|           |               |                |                                        |                           |                                  |                     |            | TCGA                                |      |          | E-MTAB-2532 |      |          | E-GEOD-56026 |      |          | GSE32507 |      |          |      | GSE24537 |          |      |      | E-GEOD-23518 |      |      | E-GEOD-17025 |      |      | E-GEOD-2109 |  |  |
|           |               |                |                                        |                           |                                  |                     |            | SMD                                 | Var  | P-value  | SMD         | Var  | P-value  | SMD          | Var  | P-value  | SMD      | Var  | P-value  | SMD  | Var      | P-value  | SMD  | Var  | P-value      | SMD  | Var  | P-value      | SMD  | Var  | P-value     |  |  |
| ERAL1     | No            | No             | No                                     | Up                        | 1.45                             | 0.033704            | validated  | 0.98                                | 0.11 | 2.83E-02 | 0.63        | 0.04 | 1.79E-02 | 0.42         | 0.10 | 2.16E-01 | 0.38     | 0.11 | 5.09E-01 | 0.35 | 0.14     | 1.60E-01 | 0.46 | 0.21 | 1.32E-01     | 0.67 | 0.10 | 1.36E-01     | 0.40 | 0.03 | 2.12E-01    |  |  |
| REST      | No            | No             | No                                     | Up                        | 1.45                             | 0.033247            | 0.2367     | 0.48                                | 0.10 | 1.57E-01 | 0.56        | 0.04 | 1.03E-02 | 0.56         | 0.11 | 1.35E-01 | 0.05     | 0.11 | 8.73E-01 | 0.05 | 0.14     | 8.99E-01 | 1.42 | 0.25 | 2.31E-01     | 0.84 | 0.10 | 1.30E-02     | 0.33 | 0.03 | 6.33E-02    |  |  |
| PP1F      | No            | Yes            | Yes                                    | Up                        | 1.45                             | 0.029105            | 0.0102     | 0.73                                | 0.11 | 9.48E-02 | 0.32        | 0.04 | 8.86E-02 | 0.12         | 0.10 | 6.12E-01 | 0.61     | 0.12 | 7.83E-02 | 0.83 | 0.15     | 4.02E-01 | 1.35 | 0.20 | 6.37E-01     | 0.85 | 0.10 | 8.41E-03     | 0.50 | 0.03 | 2.62E-02    |  |  |
| SRGAP1    | No            | Yes            | No                                     | Up                        | 1.45                             | 0.002514            | 7.7E-05    | 1.07                                | 0.11 | 6.65E-04 | 0.46        | 0.04 | 7.52E-03 | 0.39         | 0.10 | 1.42E-01 | 0.11     | 0.11 | 7.14E-01 | 0.98 | 0.15     | 2.00E-02 | 0.75 | 0.21 | 1.33E-01     | 0.38 | 0.10 | 1.43E-01     | 0.17 | 0.03 | 2.75E-01    |  |  |
| ME1       | No            | Yes            | No                                     | Up                        | 1.45                             | 0.00416             | 4E-05      | 0.36                                | 0.10 | 1.80E-01 | 0.32        | 0.04 | 5.23E-02 | 0.53         | 0.11 | 2.50E-02 | 0.23     | 0.11 | 3.57E-01 | 1.43 | 0.17     | 4.39E-02 | 0.52 | 0.21 | 3.60E-01     | 0.32 | 0.10 | 1.38E-01     | 0.61 | 0.03 | 9.72E-04    |  |  |
| CRB2      | No            | Yes            | No                                     | Up                        | 1.45                             | 0.007351            | 1.5E-19    | 1.42                                | 0.12 | 3.89E-04 | 0.47        | 0.04 | 4.96E-02 | 0.43         | 0.10 | 2.64E-01 | 0.53     | 0.12 | 5.54E-02 | 0.18 | 0.14     | 8.69E-01 | 0.22 | 0.20 | 8.43E-01     | 0.66 | 0.10 | 2.51E-01     | 0.42 | 0.03 | 1.30E-02    |  |  |
| TTL       | No            | No             | No                                     | Up                        | 1.45                             | 0.009672            | validated  | 0.45                                | 0.10 | 1.62E-01 | 0.68        | 0.04 | 1.37E-02 | 1.05         | 0.11 | 3.83E-03 | 0.69     | 0.12 | 7.62E-02 | 0.78 | 0.15     | 6.99E-02 | 0.15 | 0.20 | 5.57E-01     | 0.36 | 0.10 | 2.05E-01     | 0.18 | 0.03 | 2.61E-01    |  |  |
| CHEK1     | No            | No             | No                                     | Up                        | 1.45                             | 0.000745            | validated  | 0.89                                | 0.11 | 2.84E-03 | 0.58        | 0.04 | 1.36E-03 | 0.46         | 0.10 | 6.10E-02 | 0.83     | 0.12 | 1.07E-02 | 0.44 | 0.14     | 1.54E-01 | 0.74 | 0.21 | 8.48E-02     | 0.39 | 0.10 | 9.88E-02     | 0.00 | 0.03 | 9.86E-01    |  |  |
| ABCS5     | No            | Yes            | No                                     | Up                        | 1.45                             | 0.001319            | 0.00925    | 0.66                                | 0.11 | 8.15E-02 | 0.62        | 0.04 | 1.36E-03 | 1.27         | 0.12 | 6.89E-04 | 0.12     | 0.11 | 7.59E-01 | 0.47 | 0.14     | 1.34E-01 | 0.35 | 0.20 | 2.94E-01     | 0.35 | 0.10 | 1.76E-01     | 0.49 | 0.03 | 3.15E-02    |  |  |
| MASTL     | No            | Yes            | No                                     | Up                        | 1.45                             | 0.006853            | 0.00178    | 0.70                                | 0.11 | 2.20E-02 | 0.56        | 0.04 | 1.14E-02 | 0.47         | 0.10 | 7.78E-02 | 0.59     | 0.12 | 7.36E-02 | 0.63 | 0.14     | 1.58E-01 | 0.51 | 0.21 | 2.81E-01     | 0.66 | 0.10 | 2.38E-02     | 0.19 | 0.03 | 3.77E-01    |  |  |
| NAT10     | No            | No             | No                                     | Up                        | 1.45                             | 0.039473            | validated  | 0.76                                | 0.11 | 1.24E-01 | 0.19        | 0.04 | 4.38E-01 | 0.68         | 0.11 | 6.96E-02 | 0.26     | 0.11 | 6.60E-01 | 0.67 | 0.14     | 2.65E-02 | 0.67 | 0.21 | 5.73E-02     | 0.49 | 0.10 | 1.91E-01     | 0.60 | 0.03 | 7.21E-02    |  |  |
| STAG1     | No            | No             | No                                     | Up                        | 1.45                             | 0.018272            | validated  | 0.71                                | 0.11 | 1.98E-02 | 0.40        | 0.04 | 9.90E-02 | 0.20         | 0.10 | 5.14E-01 | 0.77     | 0.12 | 5.19E-02 | 0.70 | 0.14     | 4.29E-02 | 0.83 | 0.22 | 7.45E-02     | 0.61 | 0.10 | 6.49E-02     | 0.09 | 0.03 | 6.27E-01    |  |  |
| FHL3      | No            | No             | No                                     | Up                        | 1.45                             | 0.005672            | validated  | 0.50                                | 0.10 | 1.58E-01 | 0.43        | 0.04 | 3.75E-02 | 0.28         | 0.10 | 4.97E-01 | 0.83     | 0.12 | 3.46E-02 | 0.51 | 0.14     | 9.29E-02 | 1.06 | 0.23 | 1.38E-02     | 0.08 | 0.10 | 8.67E-01     | 0.65 | 0.03 | 3.26E-03    |  |  |
| MRPS18B   | No            | Yes            | No                                     | Up                        | 1.45                             | 0.0128              | 0.03134    | 0.99                                | 0.11 | 2.14E-02 | 0.75        | 0.04 | 1.12E-02 | 0.43         | 0.10 | 2.27E-01 | 0.05     | 0.11 | 9.17E-01 | 0.25 | 0.14     | 3.08E-01 | 0.89 | 0.22 | 1.62E-02     | 0.82 | 0.10 | 1.99E-02     | 0.16 | 0.03 | 5.51E-01    |  |  |
| TTYH3     | No            | No             | No                                     | Up                        | 1.46                             | 0.003119            | validated  | 0.71                                | 0.11 | 3.23E-02 | 0.53        | 0.04 | 1.12E-02 | 0.00         | 0.10 | 9.93E-01 | 0.72     | 0.12 | 7.46E-02 | 1.00 | 0.15     | 2.93E-03 | 0.43 | 0.20 | 1.48E-01     | 0.40 | 0.10 | 3.10E-01     | 0.54 | 0.03 | 2.51E-02    |  |  |
| FSTL5     | No            | No             | No                                     | Up                        | 1.46                             | 0.00022             | validated  | 0.34                                | 0.10 | 1.95E-01 | 0.73        | 0.04 | 5.55E-04 | 0.17         | 0.10 | 5.95E-01 | 0.95     | 0.12 | 2.05E-03 | 0.61 | 0.14     | 5.80E-02 | 0.67 | 0.21 | 6.00E-02     | 0.50 | 0.10 | 7.79E-02     | 0.35 | 0.03 | 1.20E-02    |  |  |
| ZSWIM1    | No            | No             | No                                     | Up                        | 1.46                             | 0.017065            | 0.00479    | 0.84                                | 0.11 | 3.42E-02 | 0.69        | 0.04 | 4.62E-03 | 0.35         | 0.10 | 3.10E-01 | 0.57     | 0.12 | 3.08E-01 | 0.08 | 0.14     | 6.48E-01 | 0.34 | 0.20 | 2.90E-01     | 1.02 | 0.10 | 3.47E-02     | 0.45 | 0.03 | 5.75E-02    |  |  |
| PCSK1     | No            | No             | No                                     | Up                        | 1.46                             | 0.000642            | 0.04772    | 0.61                                | 0.10 | 1.74E-02 | 0.48        | 0.04 | 5.11E-03 | 0.21         | 0.10 | 3.81E-01 | 0.09     | 0.11 | 6.78E-01 | 1.14 | 0.16     | 6.67E-03 | 0.95 | 0.22 | 2.94E-02     | 0.46 | 0.10 | 1.02E-01     | 0.41 | 0.03 | 4.97E-03    |  |  |
| MX1       | No            | Yes            | No                                     | Up                        | 1.46                             | 1.14E-05            | 1.5E-19    | 0.66                                | 0.11 | 1.31E-02 | 0.61        | 0.04 | 2.41E-04 | 0.90         | 0.11 | 1.05E-03 | 0.09     | 0.11 | 7.01E-01 | 0.92 | 0.15     | 1.50E-03 | 0.43 | 0.20 | 1.11E-01     | 0.41 | 0.10 | 7.43E-02     | 0.32 | 0.03 | 5.67E-02    |  |  |
| RBM38     | No            | Yes            | No                                     | Up                        | 1.46                             | 0.003331            | 1.5E-19    | 0.89                                | 0.11 | 1.64E-02 | 0.49        | 0.04 | 1.61E-02 | 0.90         | 0.11 | 6.13E-03 | 0.35     | 0.11 | 3.48E-01 | 0.22 | 0.14     | 2.96E-01 | 0.62 | 0.21 | 6.04E-02     | 0.31 | 0.10 | 3.34E-01     | 0.56 | 0.03 | 3.20E-02    |  |  |
| C10ORF125 | No            | Yes            | No                                     | Up                        | 1.46                             | 0.001029            | 3.8E-05    | 0.84                                | 0.11 | 7.97E-03 | 0.80        | 0.04 | 1.24E-04 | 0.55         | 0.11 | 7.01E-02 | 0.09     | 0.11 | 7.75E-01 | 0.84 | 0.15     | 9.19E-02 | 0.36 | 0.20 | 4.13E-01     | 0.20 | 0.10 | 5.44E-01     | 0.67 | 0.03 | 6.54E-03    |  |  |
| PP1FBP1   | No            | Yes            | No                                     | Up                        | 1.46                             | 0.000334            | 1.5E-19    | 1.13                                | 0.11 | 1.38E-03 | 0.78        | 0.04 | 1.95E-04 | 0.94         | 0.11 | 2.23E-03 | 0.26     | 0.11 | 3.68E-01 | 0.44 | 0.14     | 1.46E-01 | 0.35 | 0.20 | 3.19E-01     | 0.16 | 0.10 | 4.25E-01     | 0.28 | 0.03 | 1.32E-01    |  |  |
| PN01      | No            | Yes            | Yes                                    | Up                        | 1.46                             | 0.001282            | 0.00104    | 0.82                                | 0.11 | 1.51E-02 | 0.44        | 0.04 | 1.60E-02 | 0.10         | 0.10 | 7.29E-01 | 1.04     | 0.13 | 2.73E-03 | 0.16 | 0.14     | 5.38E-01 | 0.48 | 0.21 | 2.21E-01     | 0.55 | 0.10 | 7.52E-02     | 0.77 | 0.03 | 2.77E-03    |  |  |
| KLHL29    | No            | No             | No                                     | Up                        | 1.46                             | 0.000213            | 0.00132    | 0.09                                | 0.10 | 6.98E-01 | 0.53        | 0.04 | 3.17E-03 | 0.99         | 0.11 | 8.95E-04 | 1.01     | 0.13 | 1.29E-03 | 0.74 | 0.14     | 1.11E-01 | 0.21 | 0.20 | 5.26E-01     | 0.41 | 0.10 | 8.91E-02     | 0.37 | 0.03 | 2.02E-02    |  |  |
| KIAA0196  | No            | Yes            | No                                     | Up                        | 1.46                             | 0.011487            | 0.008      | 0.66                                | 0.11 | 2.88E-02 | 0.32        | 0.04 | 1.01E-01 | 0.83         | 0.11 | 5.40E-02 | 1.25     | 0.13 | 4.06E-03 | 0.40 | 0.14     | 1.34E-01 | 0.53 | 0.21 | 9.46E-02     | 0.28 | 0.10 | 3.16E-01     | 0.08 | 0.03 | 8.17E-01    |  |  |
| SLMO2     | No            | Yes            | No                                     | Up                        | 1.46                             | 0.001007            | 0.03242    | 0.47                                | 0.10 | 1.97E-01 | 0.92        | 0.04 | 1.90E-04 | 1.17         | 0.11 | 2.88E-03 | 0.30     | 0.11 | 3.50E-01 | 0.16 | 0.14     | 4.24E-01 | 0.60 | 0.21 | 8.82E-02     | 0.06 | 0.10 | 7.85E-01     | 0.67 | 0.03 | 6.23E-03    |  |  |
| GPC3      | No            | No             | No                                     | Up                        | 1.46                             | 2.85E-05            | validated  | 0.24                                | 0.10 | 2.85E-01 | 0.62        | 0.04 | 2.07E-04 | 0.18         | 0.10 | 4.41E-01 | 1.47     | 0.14 | 6.13E-06 | 0.73 | 0.14     | 1.29E-02 | 0.58 | 0.21 | 1.04E-01     | 0.29 | 0.10 | 2.31E-01     | 0.25 | 0.03 | 1.32E-01    |  |  |
| CSE1L     | No            | Yes            | Yes                                    | Up                        | 1.46                             | 0.000209            | 0.00028    | 0.28                                | 0.10 | 4.77E-01 | 0.88        | 0.04 | 3.34E-04 | 0.82         | 0.11 | 1.61E-02 | 0.37     | 0.11 | 4.07E-01 | 0.51 | 0.14     | 4.23E-02 | 0.46 | 0.21 | 1.08E-01     | 0.15 | 0.10 | 5.06E-01     | 0.89 | 0.03 | 1.01E-04    |  |  |
| CENPL     | No            | No             | No                                     | Up                        | 1.46                             | 0.025552            | validated  | 0.17                                | 0.10 | 5.68E-01 | 0.86        | 0.04 | 6.63E-04 | 0.15         | 0.10 | 5.83E-01 | 0.70     | 0.12 | 6.05E-02 | 0.60 | 0.14     | 4.64E-01 | 0.82 | 0.22 | 4.57E-01     | 0.62 | 0.10 | 5.39E-02     | 0.44 | 0.03 | 1.07E-01    |  |  |
| LSG1      | No            | Yes            | Yes                                    | Up                        | 1.46                             | 0.004537            | 0.00168    | 1.71                                | 0.13 | 9.63E-04 | 0.84        | 0.04 | 1.02E-03 | 1.03         | 0.11 | 5.01E-03 | 1.21     | 0.11 | 5.40E-01 | 0.10 | 0.14     | 6.51E-01 | 0.11 | 0.20 | 6.36E-01     | 0.07 | 0.10 | 8.23E-01     | 0.29 | 0.03 | 2.42E-01    |  |  |
| PCDH8     | No            | No             | No                                     | Up                        | 1.46                             | 3.97E-05            | validated  | 0.44                                | 0.10 | 6.50E-02 | 0.42        | 0.04 | 1.87E-02 | 0.71         | 0.11 | 1.01E-02 | 0.42     | 0.14 | 7.27E-06 | 0.45 | 0.14     | 7.30E-01 | 0.30 | 0.20 | 6.07E-01     | 0.06 | 0.10 | 8.95E-01     | 0.56 | 0.03 | 2.92E-04    |  |  |
| SLC1A6    | No            | No             | No                                     | Up                        | 1.46                             | 0.021107            | 0.00042    | 0.62                                | 0.10 | 5.69E-02 | 0.43        | 0.04 | 6.98E-02 | 0.38         | 0.10 | 1.76E-01 | 0.50     | 0.12 | 6.39E-02 | 0.73 | 0.14     | 5.85E-01 | 0.68 | 0.21 | 6.06E-01     | 0.58 | 0.10 | 1.97E-01     | 0.45 | 0.03 | 3.15E-03    |  |  |
| RADS4G    | No            | Yes            | No                                     | Up                        | 1.46                             | 0.000294            | 6E-05      | 0.73                                | 0.11 | 1.65E-02 | 0.89        | 0.04 | 1.00E-05 | 0.38         | 0.10 | 1.90E-01 | 0.31     | 0.11 | 3.09E-01 | 0.70 | 0.14     | 2.10E-01 | 0.68 | 0.21 | 2.20E-01     | 0.11 | 0.10 | 6.66E-01     | 0.58 | 0.03 | 1.50E-03    |  |  |
| MSN       | No            | Yes            | No                                     | Up                        | 1.46                             | 0.000602            | 0.00151    | 0.69                                | 0.11 | 3.75E-02 | 0.60        | 0.04 | 3.10E-03 | 0.09         | 0.10 | 1.71E-01 | 0.21     | 0.11 | 4.44E-01 | 1.63 | 0.18     | 1.41E-05 | 0.89 | 0.22 | 1.06E-02     | 0.13 | 0.10 | 5.62E-01     | 0.11 | 0.03 | 6.11E-01    |  |  |
| RAB9B     | No            | No             | No                                     | Up                        | 1.46                             | 0.003985            | 0.01523    | 0.75                                | 0.11 | 2.63E-02 | 0.22        | 0.04 | 2.73E-01 | 0.19         | 0.10 | 5.26E-01 | 1.13     | 0.13 | 2.34E-04 | 1.00 | 0.15     | 1.08E-01 | 0.29 | 0.20 | 5.25E-01     | 0.31 | 0.10 | 3.22E-01     | 0.47 | 0.03 | 9.95E-03    |  |  |
| SLC38A2   | No            | Yes            | No                                     | Up                        | 1.46                             | 0.000956            | 3.1E-05    | 1.58                                | 0.12 | 3.11E-04 | 0.98        | 0.04 | 6.41E-05 | 0.81         | 0.11 | 2.20E-02 | 0.10     | 0.11 | 7.84E-01 | 0.26 | 0.14     | 2.64E-01 | 0.32 | 0.20 | 2.67E-01     | 0.28 | 0.10 | 2.95E-01     | 1.04 | 0.03 | 8.70E-01    |  |  |
| ABOEC2    | No            | No             | No                                     | Up                        | 1.46                             | 0.00058             | validated  | 0.03                                | 0.10 | 9.32E-01 | 0.41        | 0.04 | 3.89E-02 | 0.08         | 0.10 | 8.48E-01 | 0.89     | 0.12 | 7.37E-04 | 0.46 | 0.14     | 5.77E-01 | 0.64 | 0.21 | 4.75E-01     | 0.84 | 0.10 | 7.15E-02     | 1.02 | 0.04 | 3.86E-06    |  |  |
| PIPSK1L   | No            | Yes            | No                                     | Up                        | 1.46                             | 0.006966            | 1.5E-19    | 0.71                                | 0.11 | 4.93E-02 | 0.88        | 0.04 | 1.37E-03 |              |      |          |          |      |          |      |          |          |      |      |              |      |      |              |      |      |             |  |  |

**Supplementary Table 2. Details for 2,053 genes differentially expressed between EEC and NEEC, identified by microarray meta-analysis.**  
 EEC - endometrioid endometrial cancer, NEEC - non-endometrioid endometrial cancer, SMD - Standardised Mean Difference, FDR - False Discovery Rate, Var - Variance

| Gene     | 145 gene list | 1253 gene list | Associated with EEC-specific survival? | Up/Down Regulated in NEEC | average standardised fold change | Microarray Meta FDR | RNAseq FDR | Individual microarray study results |      |          |             |      |          |              |      |          |          |      |          |          |      |          |              |      |          |              |      |          |             |      |          |
|----------|---------------|----------------|----------------------------------------|---------------------------|----------------------------------|---------------------|------------|-------------------------------------|------|----------|-------------|------|----------|--------------|------|----------|----------|------|----------|----------|------|----------|--------------|------|----------|--------------|------|----------|-------------|------|----------|
|          |               |                |                                        |                           |                                  |                     |            | TCGA                                |      |          | E-MTAB-2532 |      |          | E-GEOD-56026 |      |          | GSE32507 |      |          | GSE24537 |      |          | E-GEOD-23518 |      |          | E-GEOD-17025 |      |          | E-GEOD-2109 |      |          |
|          |               |                |                                        |                           |                                  |                     |            | SMD                                 | Var  | P-value  | SMD         | Var  | P-value  | SMD          | Var  | P-value  | SMD      | Var  | P-value  | SMD      | Var  | P-value  | SMD          | Var  | P-value  | SMD          | Var  | P-value  | SMD         | Var  | P-value  |
| SYDE1    | No            | No             | No                                     | Up                        | 1.47                             | 0.009902            | validated  | 0.15                                | 0.10 | 6.84E-01 | 0.38        | 0.04 | 7.95E-02 | 0.54         | 0.11 | 1.37E-01 | 0.50     | 0.12 | 1.53E-01 | 1.08     | 0.15 | 5.38E-03 | 0.55         | 0.21 | 1.20E-01 | 1.01         | 0.10 | 2.43E-02 | 0.27        | 0.03 | 7.93E-02 |
| POLQ     | No            | Yes            | No                                     | Up                        | 1.48                             | 0.000257            | 1.5E-19    | 0.96                                | 0.11 | 5.40E-03 | 0.74        | 0.04 | 2.09E-04 | 0.18         | 0.10 | 4.94E-01 | 0.60     | 0.12 | 5.67E-02 | 0.59     | 0.14 | 1.62E-01 | 0.46         | 0.21 | 2.50E-01 | 0.29         | 0.10 | 2.51E-01 | 0.68        | 0.03 | 1.12E-03 |
| MAP4K4   | No            | No             | No                                     | Up                        | 1.48                             | 0.00167             | validated  | 0.54                                | 0.10 | 1.56E-01 | 0.76        | 0.04 | 1.78E-03 | 0.49         | 0.10 | 7.38E-02 | 0.92     | 0.12 | 1.34E-02 | 0.28     | 0.14 | 3.99E-01 | 0.56         | 0.21 | 1.63E-01 | 0.20         | 0.10 | 3.92E-01 | 0.74        | 0.03 | 3.00E-03 |
| BHLHB9   | No            | No             | No                                     | Up                        | 1.48                             | 0.009565            | validated  | 0.61                                | 0.10 | 3.84E-02 | 0.57        | 0.04 | 1.14E-02 | 0.61         | 0.11 | 6.46E-02 | 0.56     | 0.12 | 7.47E-02 | 0.56     | 0.14 | 1.81E-01 | 1.20         | 0.24 | 5.91E-02 | 0.12         | 0.10 | 6.85E-01 | 0.27        | 0.03 | 8.48E-02 |
| NOL11    | No            | Yes            | No                                     | Up                        | 1.48                             | 0.007545            | 0.00394    | 0.32                                | 0.10 | 2.35E-01 | 0.39        | 0.04 | 3.82E-02 | 0.37         | 0.10 | 2.95E-01 | 0.67     | 0.12 | 7.34E-02 | 0.79     | 0.15 | 2.01E-02 | 0.87         | 0.22 | 2.62E-02 | 0.24         | 0.10 | 4.38E-01 | 0.84        | 0.03 | 1.60E-02 |
| SAMD5    | No            | Yes            | No                                     | Up                        | 1.48                             | 0.001604            | 1.3E-05    | 0.64                                | 0.11 | 2.13E-02 | 0.20        | 0.04 | 2.01E-01 | 0.77         | 0.11 | 5.18E-03 | 0.74     | 0.12 | 1.06E-02 | 0.88     | 0.15 | 1.45E-01 | 0.31         | 0.20 | 5.30E-01 | 0.62         | 0.10 | 3.45E-02 | 0.34        | 0.03 | 3.05E-02 |
| RBM28    | No            | No             | No                                     | Up                        | 1.48                             | 0.013167            | validated  | 0.75                                | 0.11 | 5.83E-02 | 0.49        | 0.04 | 4.74E-02 | 0.85         | 0.11 | 1.17E-02 | 0.56     | 0.12 | 2.21E-01 | 0.44     | 0.14 | 2.85E-01 | 0.21         | 0.20 | 5.76E-01 | 0.24         | 0.10 | 4.54E-01 | 0.97        | 0.03 | 5.45E-03 |
| SMARCD3  | No            | Yes            | No                                     | Up                        | 1.48                             | 0.000343            | 0.00158    | 0.50                                | 0.10 | 5.22E-02 | 0.56        | 0.04 | 2.28E-03 | 0.94         | 0.11 | 2.20E-03 | 0.99     | 0.13 | 2.01E-03 | 0.56     | 0.14 | 9.55E-02 | 0.39         | 0.20 | 2.77E-01 | 0.39         | 0.10 | 1.48E-01 | 0.18        | 0.03 | 2.99E-01 |
| PIF1     | No            | Yes            | No                                     | Up                        | 1.48                             | 0.007771            | 0.00025    | 0.43                                | 0.10 | 1.74E-01 | 0.70        | 0.04 | 2.41E-04 | 0.31         | 0.10 | 2.87E-01 | 0.50     | 0.12 | 2.69E-01 | 0.59     | 0.14 | 3.40E-01 | 1.01         | 0.23 | 1.63E-01 | 0.88         | 0.10 | 8.39E-03 | 0.08        | 0.03 | 5.63E-01 |
| GRIN2C   | No            | No             | No                                     | Up                        | 1.48                             | 0.001872            | 0.00053    | 0.28                                | 0.10 | 4.08E-01 | 0.89        | 0.04 | 1.68E-05 | 0.02         | 0.10 | 9.59E-01 | 1.33     | 0.14 | 2.32E-04 | 0.73     | 0.14 | 4.86E-01 | 0.63         | 0.21 | 5.25E-01 | 0.38         | 0.10 | 4.50E-01 | 0.26        | 0.03 | 1.46E-01 |
| JAKMIP2  | No            | No             | No                                     | Up                        | 1.48                             | 0.004599            | 0.01584    | 0.46                                | 0.10 | 9.24E-02 | 0.80        | 0.04 | 3.01E-04 | 0.33         | 0.10 | 2.83E-01 | 0.66     | 0.12 | 1.07E-02 | 0.25     | 0.14 | 8.08E-01 | 1.10         | 0.23 | 5.47E-01 | 0.55         | 0.10 | 2.51E-01 | 0.38        | 0.03 | 2.44E-02 |
| ONEUC2   | No            | No             | No                                     | Up                        | 1.48                             | 1.83E-19            | 6.7E-05    | 0.41                                | 0.10 | 1.42E-01 | 1.24        | 0.04 | 1.00E-20 | 0.22         | 0.10 | 3.72E-01 | 0.48     | 0.12 | 8.36E-02 | 0.52     | 0.14 | 3.81E-01 | 0.58         | 0.21 | 2.78E-01 | 0.38         | 0.10 | 1.54E-01 | 0.71        | 0.03 | 1.01E-04 |
| ATOH8    | No            | No             | No                                     | Up                        | 1.48                             | 0.001055            | 0.01228    | 0.56                                | 0.10 | 4.85E-02 | 0.08        | 0.04 | 5.97E-01 | 0.92         | 0.11 | 1.69E-02 | 0.63     | 0.12 | 2.35E-02 | 0.79     | 0.15 | 1.89E-02 | 0.42         | 0.20 | 2.10E-01 | 0.44         | 0.10 | 2.16E-01 | 0.71        | 0.03 | 7.87E-04 |
| RAB2B    | No            | No             | No                                     | Up                        | 1.48                             | 0.027429            | validated  | 0.67                                | 0.11 | 1.01E-01 | 0.05        | 0.04 | 8.11E-01 | 0.94         | 0.11 | 2.84E-02 | 0.98     | 0.13 | 5.82E-02 | 0.23     | 0.14 | 2.98E-01 | 0.37         | 0.20 | 1.88E-01 | 0.96         | 0.10 | 8.69E-03 | 0.34        | 0.03 | 2.96E-01 |
| TREML2   | No            | Yes            | No                                     | Up                        | 1.48                             | 0.003957            | 1.5E-19    | 0.99                                | 0.11 | 8.41E-04 | 0.35        | 0.04 | 4.78E-02 | 0.08         | 0.10 | 8.38E-01 | 0.10     | 0.11 | 9.85E-01 | 0.21     | 0.14 | 7.71E-01 | 1.56         | 0.26 | 1.95E-01 | 0.58         | 0.10 | 2.66E-01 | 0.79        | 0.03 | 1.18E-04 |
| PRRG1    | No            | Yes            | Yes                                    | Up                        | 1.48                             | 0.000745            | 1.5E-19    | 1.42                                | 0.12 | 6.35E-04 | 0.34        | 0.04 | 9.51E-02 | 0.72         | 0.11 | 9.87E-03 | 0.01     | 0.11 | 7.32E-01 | 0.68     | 0.14 | 6.16E-02 | 0.02         | 0.20 | 9.29E-01 | 0.58         | 0.10 | 3.62E-02 | 0.70        | 0.03 | 3.56E-03 |
| KIRREL2  | No            | Yes            | Yes                                    | Up                        | 1.48                             | 8.71E-05            | 1.5E-19    | 0.30                                | 0.10 | 2.02E-01 | 1.15        | 0.04 | 4.54E-07 | 0.46         | 0.10 | 1.83E-01 | 1.13     | 0.13 | 1.37E-04 | 0.25     | 0.14 | 8.01E-01 | 0.75         | 0.21 | 5.06E-01 | 0.25         | 0.10 | 5.17E-01 | 0.28        | 0.03 | 9.04E-02 |
| KIF15    | No            | No             | Yes                                    | Up                        | 1.48                             | 0.00011             | 0.00761    | 0.53                                | 0.10 | 6.12E-02 | 0.60        | 0.04 | 9.80E-04 | 0.31         | 0.10 | 1.92E-01 | 0.97     | 0.13 | 3.49E-03 | 0.20     | 0.14 | 4.55E-01 | 0.55         | 0.21 | 2.44E-01 | 0.75         | 0.10 | 4.11E-03 | 0.64        | 0.03 | 4.24E-03 |
| PHF20L1  | No            | No             | No                                     | Up                        | 1.48                             | 0.003975            | validated  | 0.70                                | 0.11 | 8.48E-02 | 0.33        | 0.04 | 5.87E-02 | 0.43         | 0.10 | 1.26E-01 | 1.14     | 0.13 | 2.99E-03 | 0.50     | 0.14 | 1.19E-01 | 0.73         | 0.21 | 5.81E-02 | 0.65         | 0.10 | 2.14E-02 | 0.10        | 0.03 | 5.70E-01 |
| FXYD1    | No            | No             | No                                     | Up                        | 1.49                             | 0.000381            | 0.00305    | 1.06                                | 0.11 | 1.27E-03 | 0.03        | 0.04 | 8.24E-01 | 0.25         | 0.10 | 5.06E-01 | 0.81     | 0.12 | 5.59E-03 | 1.01     | 0.15 | 1.03E-02 | 0.70         | 0.21 | 6.26E-02 | 0.14         | 0.10 | 7.58E-01 | 0.56        | 0.03 | 5.28E-04 |
| LECT1    | No            | No             | No                                     | Up                        | 1.49                             | 0.001066            | 0.00107    | 1.10                                | 0.11 | 2.43E-04 | 0.64        | 0.04 | 6.24E-03 | 0.41         | 0.10 | 4.96E-01 | 0.29     | 0.11 | 3.45E-01 | 0.64     | 0.14 | 4.75E-01 | 0.44         | 0.20 | 2.66E-01 | 0.45         | 0.10 | 2.97E-01 | 0.60        | 0.03 | 8.14E-04 |
| RP56K6   | No            | Yes            | No                                     | Up                        | 1.49                             | 0.00349             | 1.5E-19    | 1.00                                | 0.11 | 8.23E-04 | 0.72        | 0.04 | 1.44E-02 | 0.66         | 0.11 | 2.66E-02 | 0.14     | 0.11 | 5.86E-01 | 0.96     | 0.15 | 3.16E-01 | 0.25         | 0.20 | 7.60E-01 | 0.47         | 0.10 | 1.23E-01 | 0.36        | 0.03 | 2.16E-02 |
| HEATR6   | No            | No             | No                                     | Up                        | 1.49                             | 0.033435            | 0.01638    | 0.25                                | 0.10 | 5.41E-01 | 0.54        | 0.04 | 3.88E-02 | 0.36         | 0.10 | 3.67E-01 | 0.89     | 0.12 | 5.66E-02 | 0.55     | 0.14 | 1.72E-01 | 0.82         | 0.22 | 1.11E-01 | 0.79         | 0.10 | 4.31E-02 | 0.37        | 0.03 | 9.13E-02 |
| SPON1    | No            | Yes            | No                                     | Up                        | 1.49                             | 3.58E-06            | 1.5E-19    | 1.51                                | 0.12 | 4.54E-07 | 0.26        | 0.04 | 4.90E-02 | 0.56         | 0.11 | 1.25E-02 | 0.17     | 0.11 | 4.22E-01 | 0.28     | 0.14 | 1.73E-01 | 0.77         | 0.22 | 1.54E-02 | 0.66         | 0.10 | 4.06E-03 | 0.38        | 0.03 | 1.03E-02 |
| PHF1     | No            | No             | No                                     | Up                        | 1.49                             | 0.003011            | validated  | 0.82                                | 0.11 | 4.50E-02 | 0.69        | 0.04 | 1.34E-03 | 0.39         | 0.10 | 2.89E-01 | 0.21     | 0.11 | 6.45E-01 | 0.88     | 0.15 | 6.22E-03 | 0.52         | 0.21 | 1.27E-01 | 1.02         | 0.10 | 1.22E-02 | 0.05        | 0.03 | 7.60E-01 |
| TROPAP   | No            | Yes            | No                                     | Up                        | 1.49                             | 0.000167            | 5.1E-05    | 0.66                                | 0.11 | 4.75E-02 | 0.84        | 0.04 | 2.20E-05 | 0.29         | 0.10 | 3.02E-01 | 0.17     | 0.11 | 5.71E-01 | 0.41     | 0.14 | 1.95E-01 | 0.76         | 0.21 | 6.76E-02 | 0.99         | 0.10 | 3.34E-03 | 0.47        | 0.03 | 1.97E-02 |
| FOXM1    | No            | Yes            | No                                     | Up                        | 1.49                             | 4.80E-05            | 0.00075    | 0.68                                | 0.11 | 2.23E-02 | 0.78        | 0.04 | 6.75E-05 | 0.31         | 0.10 | 1.98E-01 | 0.78     | 0.12 | 2.85E-02 | 0.57     | 0.14 | 1.05E-01 | 0.50         | 0.21 | 1.79E-01 | 0.36         | 0.10 | 1.47E-01 | 0.62        | 0.03 | 6.19E-04 |
| FIGN     | No            | Yes            | No                                     | Up                        | 1.49                             | 4.80E-05            | 1.5E-19    | 1.20                                | 0.11 | 6.88E-04 | 0.58        | 0.04 | 1.70E-03 | 0.76         | 0.11 | 4.67E-03 | 0.27     | 0.11 | 2.80E-01 | 0.53     | 0.14 | 6.00E-01 | 0.38         | 0.20 | 6.37E-01 | 0.14         | 0.10 | 4.92E-01 | 0.74        | 0.03 | 4.93E-05 |
| C1QTNF4  | No            | No             | No                                     | Up                        | 1.49                             | 0.005476            | 0.02715    | 0.71                                | 0.11 | 2.14E-02 | 0.31        | 0.04 | 7.24E-02 | 0.42         | 0.10 | 1.56E-01 | 0.77     | 0.12 | 1.54E-02 | 0.69     | 0.14 | 1.77E-01 | 0.63         | 0.21 | 3.12E-01 | 0.64         | 0.10 | 2.45E-01 | 0.45        | 0.03 | 6.64E-03 |
| ST8SIA2  | No            | No             | No                                     | Up                        | 1.49                             | 8.89E-05            | 0.00086    | 0.21                                | 0.10 | 6.11E-01 | 0.48        | 0.04 | 6.32E-02 | 1.22         | 0.11 | 1.20E-04 | 0.33     | 0.11 | 2.49E-01 | 0.24     | 0.14 | 6.39E-01 | 0.20         | 0.22 | 1.69E-01 | 0.69         | 0.10 | 5.58E-03 | 0.64        | 0.03 | 6.45E-05 |
| ODC1     | No            | Yes            | No                                     | Up                        | 1.49                             | 0.000327            | 0.00023    | 1.05                                | 0.11 | 2.00E-03 | 0.39        | 0.04 | 3.51E-02 | 0.96         | 0.11 | 4.01E-03 | 0.37     | 0.11 | 2.52E-01 | 0.55     | 0.14 | 3.13E-02 | 0.29         | 0.20 | 2.17E-01 | 0.36         | 0.10 | 1.20E-01 | 0.64        | 0.03 | 9.59E-03 |
| VWVC3    | No            | No             | No                                     | Up                        | 1.49                             | 0.005065            | validated  | 0.38                                | 0.10 | 1.76E-01 | 0.66        | 0.04 | 1.87E-03 | 0.82         | 0.11 | 1.63E-02 | 0.48     | 0.12 | 1.74E-01 | 1.21     | 0.16 | 8.65E-03 | 0.80         | 0.22 | 1.12E-01 | 0.10         | 0.10 | 7.18E-01 | 0.17        | 0.03 | 4.35E-01 |
| MAPK3    | No            | Yes            | No                                     | Up                        | 1.49                             | 0.029354            | 0.0041     | 1.19                                | 0.11 | 8.88E-03 | 0.19        | 0.04 | 3.81E-01 | 0.24         | 0.10 | 6.25E-01 | 0.77     | 0.12 | 1.22E-01 | 0.58     | 0.14 | 3.45E-02 | 0.61         | 0.21 | 5.59E-02 | 0.79         | 0.10 | 1.33E-01 | 0.25        | 0.03 | 3.51E-01 |
| ITGB1BP1 | No            | Yes            | No                                     | Up                        | 1.49                             | 0.00063             | 0.00859    | 0.50                                | 0.10 | 1.09E-01 | 0.36        | 0.04 | 6.17E-02 | 0.51         | 0.11 | 6.05E-02 | 1.13     | 0.13 | 2.95E-03 | 0.78     | 0.15 | 2.06E-02 | 0.27         | 0.20 | 2.77E-01 | 0.55         | 0.10 | 6.02E-02 | 0.51        | 0.03 | 5.25E-03 |
| TYRO3    | No            | No             | No                                     | Up                        | 1.49                             | 0.020325            | validated  | 0.21                                | 0.10 | 4.54E-01 | 0.09        | 0.04 | 5.80E-01 | 0.47         | 0.10 | 1.73E-01 | 0.60     | 0.12 | 7.21E-02 | 1.09     | 0.15 | 5.38E-03 | 1.38         | 0.25 | 1.21E-02 | 0.54         | 0.10 | 2.10E-01 | 0.23        | 0.03 | 2.01E-01 |
| CENPE    | No            | No             | No                                     | Up                        | 1.49                             | 0.000138            | 0.00268    | 0.68                                | 0.11 | 2.59E-02 | 0.73        | 0.04 | 2.91E-04 | 0.37         | 0.10 | 1.37E-01 | 0.39     | 0.12 | 1.95E-01 | 0.84     | 0.15 | 3.44E-02 | 0.25         | 0.20 | 3.99E-01 | 0.69         | 0.10 | 2.40E-02 | 0.67        | 0.03 | 1.62E-03 |
| ZNFX404  | No            | No             | No                                     | Up                        | 1.49                             | 0.00016             | validated  | 0.60                                | 0.10 | 2.66E-02 | 0.56        | 0.04 | 4.34E-03 | 0.88         | 0.11 | 2.66E-03 | 0.55     | 0.12 | 3.36E-02 | 0.19     | 0.14 | 7.09E-01 | 1.09         | 0.23 | 3.10E-01 | 0.08         | 0.10 | 7.36E-01 | 0.67        | 0.03 | 8.25E-05 |
| SERTAD2  | No            | No             | No                                     | Up                        | 1.49                             | 0.001735            | validated  | 1.01                                | 0.11 | 1.10E-02 | 0.68        | 0.04 | 2        |              |      |          |          |      |          |          |      |          |              |      |          |              |      |          |             |      |          |

**Supplementary Table 2. Details for 2,053 genes differentially expressed between EEC and NEEC, identified by microarray meta-analysis.**  
 EEC - endometrioid endometrial cancer, NEEC - non-endometrioid endometrial cancer, SMD - Standardised Mean Difference, FDR - False Discovery Rate, Var - Variance

| Gene     | 145 gene list | 1253 gene list | Associated with EEC-specific survival? | Up/Down Regulated in NEEC | average standardised fold change | Microarray Meta FDR | RNAseq FDR | Individual microarray study results |      |          |             |      |          |              |      |          |          |      |          |          |      |          |              |      |          |              |      |          |             |      |          |          |
|----------|---------------|----------------|----------------------------------------|---------------------------|----------------------------------|---------------------|------------|-------------------------------------|------|----------|-------------|------|----------|--------------|------|----------|----------|------|----------|----------|------|----------|--------------|------|----------|--------------|------|----------|-------------|------|----------|----------|
|          |               |                |                                        |                           |                                  |                     |            | TCGA                                |      |          | E-MTAB-2532 |      |          | E-GEOD-56026 |      |          | GSE32507 |      |          | GSE24537 |      |          | E-GEOD-23518 |      |          | E-GEOD-17025 |      |          | E-GEOD-2109 |      |          |          |
|          |               |                |                                        |                           |                                  |                     |            | SMD                                 | Var  | P-value  | SMD         | Var  | P-value  | SMD          | Var  | P-value  | SMD      | Var  | P-value  | SMD      | Var  | P-value  | SMD          | Var  | P-value  | SMD          | Var  | P-value  | SMD         | Var  | P-value  |          |
| ZNF187   | No            | No             | No                                     | Up                        | 1.51                             | 0.014866            | validated  | 0.60                                |      | 0.10     | 6.17E-02    | 0.22 | 0.04     | 2.57E-01     | 0.79 | 0.11     | 3.88E-02 | 1.10 | 0.13     | 2.08E-02 | 0.30 | 0.14     | 3.21E-01     | 0.71 | 0.21     | 1.06E-01     | 0.34 | 0.10     | 3.12E-01    | 0.68 | 0.03     | 2.92E-02 |
| XPO5     | No            | Yes            | Yes                                    | Up                        | 1.51                             | 0.002177            | 0.00023    | 1.18                                | 0.11 | 4.89E-03 | 0.70        | 0.04 | 4.04E-03 | 1.06         | 0.11 | 4.56E-03 | 0.50     | 0.12 | 2.31E-01 | 0.30     | 0.14 | 3.12E-01 | 0.38         | 0.20 | 3.32E-01 | 0.14         | 0.10 | 6.48E-01 | 0.48        | 0.03 | 2.63E-02 |          |
| MAGEE1   | No            | Yes            | No                                     | Up                        | 1.51                             | 0.001149            | 9.7E-05    | 0.68                                | 0.11 | 5.48E-02 | 0.29        | 0.04 | 1.52E-01 | 0.85         | 0.11 | 9.97E-03 | 0.70     | 0.12 | 9.37E-02 | 0.83     | 0.15 | 2.42E-02 | 0.48         | 0.21 | 1.63E-01 | 0.36         | 0.10 | 1.22E-01 | 0.56        | 0.03 | 2.56E-03 |          |
| EVC2     | No            | No             | No                                     | Up                        | 1.51                             | 0.002852            | 0.00603    | 0.41                                | 0.10 | 1.17E-01 | 0.23        | 0.04 | 2.56E-01 | 0.88         | 0.11 | 1.20E-02 | 0.75     | 0.12 | 1.19E-02 | 0.66     | 0.14 | 5.19E-01 | 0.84         | 0.22 | 4.59E-01 | 0.36         | 0.10 | 2.43E-01 | 0.62        | 0.03 | 2.89E-04 |          |
| NES      | No            | No             | No                                     | Up                        | 1.51                             | 3.34E-05            | validated  | 0.09                                | 0.10 | 7.31E-01 | 0.53        | 0.04 | 3.07E-03 | 0.46         | 0.10 | 9.78E-02 | 1.05     | 0.13 | 9.38E-04 | 1.28     | 0.16 | 3.53E-04 | 0.76         | 0.21 | 2.57E-02 | 0.10         | 0.10 | 7.12E-01 | 0.49        | 0.03 | 5.35E-03 |          |
| HSPA12B  | No            | No             | No                                     | Up                        | 1.51                             | 0.000113            | validated  | 0.43                                | 0.10 | 2.11E-01 | 0.19        | 0.04 | 2.12E-01 | 0.41         | 0.10 | 2.21E-01 | 1.26     | 0.13 | 1.31E-04 | 1.02     | 0.15 | 3.45E-03 | 0.64         | 0.21 | 5.81E-02 | 0.21         | 0.10 | 5.40E-01 | 0.59        | 0.03 | 5.76E-04 |          |
| HECW2    | No            | No             | No                                     | Up                        | 1.51                             | 0.008591            | validated  | 0.47                                | 0.10 | 1.78E-01 | 0.53        | 0.04 | 3.05E-02 | 0.28         | 0.10 | 2.90E-01 | 0.77     | 0.12 | 1.72E-02 | 1.34     | 0.16 | 4.73E-02 | 0.30         | 0.20 | 4.68E-01 | 0.89         | 0.10 | 7.66E-03 | 0.18        | 0.03 | 2.14E-01 |          |
| ASB6     | No            | No             | No                                     | Up                        | 1.51                             | 0.014669            | validated  | 1.27                                | 0.12 | 4.67E-03 | 0.57        | 0.04 | 2.03E-02 | 0.52         | 0.11 | 1.95E-01 | 0.62     | 0.12 | 2.19E-01 | 0.12     | 0.14 | 5.73E-01 | 0.40         | 0.20 | 3.95E-01 | 0.96         | 0.10 | 2.23E-02 | 0.67        | 0.03 | 1.86E-01 |          |
| ZNF570   | No            | No             | No                                     | Up                        | 1.51                             | 0.014322            | validated  | 0.95                                | 0.11 | 6.25E-03 | 0.50        | 0.04 | 4.64E-02 | 0.26         | 0.10 | 4.47E-01 | 0.61     | 0.12 | 1.21E-01 | 0.35     | 0.14 | 5.84E-01 | 0.91         | 0.22 | 3.24E-01 | 0.53         | 0.10 | 1.51E-01 | 0.29        | 0.03 | 7.98E-03 |          |
| LRP12    | No            | No             | No                                     | Up                        | 1.51                             | 0.000384            | 0.04269    | 0.38                                | 0.10 | 1.90E-01 | 1.01        | 0.04 | 2.43E-05 | 0.72         | 0.11 | 9.19E-03 | 1.02     | 0.13 | 7.43E-03 | 0.49     | 0.14 | 4.84E-01 | 0.52         | 0.21 | 4.80E-01 | 0.30         | 0.10 | 2.52E-01 | 0.34        | 0.03 | 4.20E-02 |          |
| PEL2     | No            | Yes            | No                                     | Up                        | 1.51                             | 0.000108            | 1.5E-19    | 0.99                                | 0.11 | 9.86E-04 | 0.42        | 0.04 | 1.63E-02 | 0.49         | 0.10 | 4.98E-02 | 1.07     | 0.13 | 2.45E-03 | 0.21     | 0.14 | 4.55E-01 | 0.75         | 0.21 | 7.37E-02 | 0.38         | 0.10 | 1.17E-01 | 0.45        | 0.03 | 8.93E-03 |          |
| DDI1     | No            | No             | No                                     | Up                        | 1.51                             | 0.004798            | validated  | 0.85                                | 0.11 | 4.82E-02 | 0.67        | 0.04 | 1.19E-02 | 0.72         | 0.11 | 1.18E-01 | 0.20     | 0.11 | 6.76E-01 | 0.63     | 0.14 | 1.90E-02 | 0.82         | 0.22 | 1.20E-02 | 0.27         | 0.10 | 3.93E-01 | 0.61        | 0.03 | 6.09E-02 |          |
| EMP1     | No            | Yes            | No                                     | Up                        | 1.51                             | 1.14E-05            | 0.00297    | 1.07                                | 0.11 | 1.94E-04 | 0.69        | 0.04 | 1.96E-04 | 0.62         | 0.11 | 1.62E-02 | 0.36     | 0.11 | 1.99E-01 | 0.43     | 0.14 | 7.45E-02 | 0.83         | 0.22 | 1.13E-02 | 0.40         | 0.10 | 7.43E-02 | 0.37        | 0.03 | 3.97E-02 |          |
| PDE3B    | No            | No             | No                                     | Up                        | 1.51                             | 0.015715            | 0.04999    | 0.05                                | 0.10 | 8.68E-01 | 0.52        | 0.04 | 2.34E-02 | 0.71         | 0.11 | 2.56E-02 | 0.44     | 0.12 | 1.06E-01 | 0.86     | 0.15 | 1.07E-01 | 1.30         | 0.24 | 2.40E-01 | 0.54         | 0.10 | 1.00E-01 | 0.35        | 0.03 | 3.27E-02 |          |
| MFN2     | No            | No             | No                                     | Up                        | 1.51                             | 0.004237            | validated  | 0.18                                | 0.10 | 6.48E-01 | 0.68        | 0.04 | 7.64E-03 | 0.53         | 0.11 | 1.71E-01 | 0.14     | 0.11 | 7.91E-01 | 0.80     | 0.15 | 4.54E-02 | 0.66         | 0.21 | 1.10E-01 | 1.67         | 0.11 | 1.19E-04 | 0.11        | 0.03 | 4.68E-01 |          |
| LY6E     | No            | Yes            | No                                     | Up                        | 1.51                             | 9.89E-06            | 1.5E-19    | 1.12                                | 0.11 | 2.60E-04 | 0.66        | 0.04 | 5.67E-04 | 0.91         | 0.11 | 1.35E-03 | 0.54     | 0.12 | 5.52E-02 | 0.81     | 0.15 | 3.69E-03 | 0.22         | 0.20 | 3.12E-01 | 0.22         | 0.10 | 3.40E-01 | 0.30        | 0.03 | 6.12E-02 |          |
| FBX16    | No            | Yes            | No                                     | Up                        | 1.51                             | 1.41E-05            | 1.5E-19    | 1.21                                | 0.11 | 2.79E-05 | 0.61        | 0.04 | 3.29E-04 | 0.47         | 0.10 | 5.85E-02 | 0.04     | 0.11 | 8.79E-01 | 0.63     | 0.14 | 1.88E-01 | 0.44         | 0.20 | 4.19E-01 | 0.89         | 0.10 | 5.89E-03 | 0.49        | 0.03 | 9.73E-03 |          |
| HOXA13   | No            | No             | No                                     | Up                        | 1.51                             | 4.80E-05            | validated  | 0.15                                | 0.10 | 5.33E-01 | 0.46        | 0.04 | 9.45E-03 | 0.09         | 0.10 | 7.48E-01 | 1.15     | 0.13 | 7.41E-05 | 0.99     | 0.15 | 1.25E-02 | 0.82         | 0.22 | 4.90E-02 | 0.64         | 0.10 | 6.29E-02 | 0.50        | 0.03 | 1.16E-03 |          |
| ZNF568   | No            | Yes            | No                                     | Up                        | 1.51                             | 0.000847            | 0.00024    | 0.48                                | 0.10 | 1.13E-01 | 0.27        | 0.04 | 1.86E-01 | 0.75         | 0.11 | 3.73E-02 | 1.97     | 0.16 | 3.63E-06 | 0.41     | 0.14 | 6.99E-01 | 0.07         | 0.20 | 9.50E-01 | 0.50         | 0.10 | 1.01E-01 | 0.56        | 0.03 | 2.40E-02 |          |
| C12ORF53 | No            | No             | No                                     | Up                        | 1.51                             | 0.000642            | validated  | 0.54                                | 0.10 | 9.42E-02 | 0.66        | 0.04 | 6.36E-01 | 0.04         | 0.10 | 9.12E-01 | 1.38     | 0.14 | 2.27E-05 | 1.02     | 0.15 | 5.00E-02 | 0.85         | 0.22 | 2.03E-01 | 0.31         | 0.10 | 5.18E-01 | 0.39        | 0.03 | 3.52E-04 |          |
| GPX7     | No            | No             | No                                     | Up                        | 1.52                             | 9.84E-05            | validated  | 0.05                                | 0.10 | 8.47E-01 | 0.78        | 0.04 | 3.25E-04 | 0.91         | 0.11 | 4.15E-03 | 0.85     | 0.12 | 9.50E-03 | 0.55     | 0.14 | 4.40E-02 | 0.93         | 0.22 | 9.37E-03 | 0.13         | 0.10 | 5.73E-01 | 0.58        | 0.03 | 2.06E-02 |          |
| RPL39L   | No            | Yes            | No                                     | Up                        | 1.52                             | 1.14E-05            | 3.5E-05    | 1.01                                | 0.11 | 4.10E-04 | 0.47        | 0.04 | 4.33E-03 | 0.73         | 0.11 | 1.05E-02 | 0.70     | 0.12 | 1.12E-02 | 0.44     | 0.14 | 8.40E-02 | 0.85         | 0.22 | 1.98E-02 | 0.11         | 0.10 | 6.49E-01 | 0.51        | 0.03 | 6.02E-03 |          |
| CHRN1    | No            | No             | No                                     | Up                        | 1.52                             | 0.001524            | 0.01137    | 0.79                                | 0.11 | 2.69E-02 | 0.85        | 0.04 | 4.34E-04 | 0.63         | 0.11 | 9.92E-02 | 0.40     | 0.12 | 1.62E-01 | 0.53     | 0.14 | 2.00E-01 | 0.54         | 0.21 | 1.98E-01 | 0.58         | 0.10 | 3.04E-01 | 0.49        | 0.03 | 7.67E-03 |          |
| WNT1R1   | No            | No             | No                                     | Up                        | 1.52                             | 0.002815            | validated  | 1.15                                | 0.11 | 9.88E-04 | 0.37        | 0.04 | 4.44E-02 | 0.38         | 0.10 | 1.89E-01 | 0.95     | 0.13 | 3.42E-03 | 0.66     | 0.14 | 1.94E-01 | 0.77         | 0.21 | 2.35E-01 | 0.33         | 0.10 | 2.18E-01 | 0.20        | 0.03 | 2.45E-01 |          |
| FTN      | No            | No             | No                                     | Up                        | 1.52                             | 0.000235            | 0.02417    | 0.34                                | 0.10 | 1.98E-01 | 0.39        | 0.04 | 3.13E-02 | 0.58         | 0.11 | 2.97E-02 | 0.77     | 0.12 | 1.99E-02 | 1.40     | 0.17 | 4.78E-04 | 0.58         | 0.21 | 8.64E-02 | 0.21         | 0.10 | 3.69E-01 | 0.55        | 0.03 | 5.77E-03 |          |
| CRABP1   | No            | No             | No                                     | Up                        | 1.52                             | 1.83E-19            | 0.00024    | 0.41                                | 0.10 | 8.33E-02 | 1.03        | 0.04 | 4.54E-07 | 0.58         | 0.11 | 3.62E-02 | 0.99     | 0.13 | 1.11E-03 | 0.25     | 0.14 | 2.16E-01 | 0.74         | 0.21 | 2.37E-02 | 0.33         | 0.10 | 3.26E-01 | 0.48        | 0.03 | 1.05E-03 |          |
| EVC      | No            | Yes            | No                                     | Up                        | 1.52                             | 0.003764            | 0.00098    | 0.65                                | 0.11 | 3.61E-02 | 0.51        | 0.04 | 8.77E-03 | 0.51         | 0.11 | 8.81E-02 | 0.46     | 0.12 | 1.10E-01 | 1.22     | 0.16 | 1.44E-02 | 0.78         | 0.22 | 1.15E-01 | 0.61         | 0.10 | 4.23E-02 | 0.08        | 0.03 | 6.54E-01 |          |
| ETNK2    | No            | No             | No                                     | Up                        | 1.52                             | 0.0071              | 0.02377    | 0.69                                | 0.11 | 5.17E-02 | 0.24        | 0.04 | 2.53E-01 | 0.55         | 0.11 | 1.40E-01 | 1.19     | 0.13 | 9.10E-04 | 0.41     | 0.14 | 3.50E-01 | 0.72         | 0.21 | 1.62E-01 | 0.63         | 0.10 | 1.11E-01 | 0.39        | 0.03 | 5.92E-02 |          |
| SLC41A1P | No            | Yes            | No                                     | Up                        | 1.52                             | 0.023395            | 0.00255    | 1.22                                | 0.12 | 1.29E-02 | 0.75        | 0.04 | 8.73E-03 | 0.85         | 0.11 | 3.05E-02 | 0.77     | 0.12 | 1.30E-01 | 0.64     | 0.14 | 2.91E-01 | 0.22         | 0.20 | 5.49E-01 | 0.07         | 0.10 | 8.17E-01 | 0.30        | 0.03 | 2.16E-01 |          |
| CACNA1G  | No            | No             | No                                     | Up                        | 1.52                             | 0.000475            | validated  | 0.15                                | 0.10 | 7.28E-01 | 0.76        | 0.04 | 1.19E-04 | 0.87         | 0.11 | 1.80E-02 | 1.09     | 0.13 | 5.01E-04 | 0.57     | 0.14 | 2.51E-01 | 0.75         | 0.21 | 1.91E-01 | 0.33         | 0.10 | 4.52E-01 | 0.31        | 0.03 | 6.58E-02 |          |
| KPNA1    | No            | No             | No                                     | Up                        | 1.52                             | 0.00449             | 0.04772    | 0.79                                | 0.11 | 6.37E-02 | 0.77        | 0.04 | 1.06E-02 | 0.63         | 0.11 | 6.21E-02 | 1.07     | 0.11 | 7.00E-01 | 0.38     | 0.14 | 2.34E-01 | 0.43         | 0.20 | 2.95E-01 | 1.25         | 0.10 | 8.22E-04 | 0.41        | 0.03 | 1.28E-01 |          |
| PDPN     | No            | Yes            | No                                     | Up                        | 1.52                             | 8.12E-05            | 0.00064    | 0.60                                | 0.10 | 2.60E-02 | 0.59        | 0.04 | 9.09E-04 | 0.58         | 0.11 | 3.49E-02 | 0.46     | 0.12 | 7.83E-02 | 0.61     | 0.14 | 3.56E-02 | 0.67         | 0.21 | 3.89E-02 | 1.15         | 0.10 | 7.49E-04 | 0.09        | 0.03 | 5.46E-01 |          |
| ATP11B   | No            | Yes            | Yes                                    | Up                        | 1.52                             | 0.000524            | 1.5E-05    | 0.32                                | 0.10 | 2.83E-01 | 0.24        | 0.04 | 1.46E-01 | 0.76         | 0.11 | 7.87E-03 | 0.80     | 0.12 | 2.35E-02 | 0.86     | 0.15 | 1.61E-01 | 0.74         | 0.21 | 2.52E-01 | 0.40         | 0.10 | 9.95E-02 | 0.78        | 0.03 | 4.45E-05 |          |
| RAB4     | No            | No             | No                                     | Up                        | 1.52                             | 0.000734            | 0.0065     | 0.54                                | 0.10 | 5.43E-02 | 0.34        | 0.04 | 3.80E-02 | 0.23         | 0.10 | 4.48E-01 | 1.01     | 0.13 | 5.12E-03 | 0.54     | 0.14 | 5.54E-01 | 0.16         | 0.20 | 8.29E-01 | 1.39         | 0.11 | 2.49E-04 | 0.62        | 0.03 | 5.68E-03 |          |
| POLR3A   | No            | No             | No                                     | Up                        | 1.52                             | 0.005495            | validated  | 1.00                                | 0.11 | 3.65E-02 | 0.53        | 0.04 | 1.88E-02 | 0.65         | 0.11 | 6.80E-02 | 0.50     | 0.12 | 2.22E-01 | 0.55     | 0.14 | 1.05E-01 | 0.32         | 0.20 | 2.80E-01 | 1.00         | 0.10 | 1.36E-02 | 0.29        | 0.03 | 8.16E-02 |          |
| CNCF     | No            | Yes            | No                                     | Up                        | 1.52                             | 0.000302            | 0.00053    | 0.85                                | 0.11 | 1.45E-02 | 0.74        | 0.04 | 1.43E-03 | 0.35         | 0.10 | 2.50E-01 | 1.06     | 0.13 | 4.93E-03 | 0.78     | 0.15 | 2.03E-02 | 1.23         | 0.20 | 4.07E-01 | 0.39         | 0.10 | 2.45E-01 | 0.45        | 0.03 | 9.10E-03 |          |
| EPM2AIP1 | No            | Yes            | No                                     | Up                        | 1.52                             | 5.41E-05            | 1.5E-19    | 0.39                                | 0.10 | 1.07E-01 | 0.56        | 0.04 | 1.34E-03 | 0.61         | 0.11 | 2.76E-02 | 0.64     | 0.12 | 2.32E-02 | 0.51     | 0.14 | 7.01E-02 | 0.25         | 0.24 | 2.96E-03 | 0.48         | 0.10 | 3.59E-02 | 0.41        | 0.03 | 2.52E-02 |          |
| KCNJ2    | No            | Yes            | No                                     | Up                        | 1.52                             | 0.000482            | 1.5E-19    | 1.43                                | 0.12 | 6.95E-05 | 0.56        | 0.04 | 3.31E-02 |              |      |          |          |      |          |          |      |          |              |      |          |              |      |          |             |      |          |          |



**Supplementary Table 2. Details for 2,053 genes differentially expressed between EEC and NEEC, identified by microarray meta-analysis.**  
 EEC - endometrioid endometrial cancer, NEEC - non-endometrioid endometrial cancer, SMD - Standardised Mean Difference, FDR - False Discovery Rate, Var - Variance

| Gene     | 145 gene list | 1253 gene list | Associated with EEC-specific survival? | Up/Down Regulated in NEEC | average standardised fold change | Microarray Meta FDR | RNAseq FDR | Individual microarray study results |      |          |             |      |          |              |      |          |          |      |          |      |          |          |      |      |              |      |      |              |      |      |             |  |  |
|----------|---------------|----------------|----------------------------------------|---------------------------|----------------------------------|---------------------|------------|-------------------------------------|------|----------|-------------|------|----------|--------------|------|----------|----------|------|----------|------|----------|----------|------|------|--------------|------|------|--------------|------|------|-------------|--|--|
|          |               |                |                                        |                           |                                  |                     |            | TCGA                                |      |          | E-MTAB-2532 |      |          | E-GEOD-56026 |      |          | GSE32507 |      |          |      | GSE24537 |          |      |      | E-GEOD-23518 |      |      | E-GEOD-17025 |      |      | E-GEOD-2109 |  |  |
|          |               |                |                                        |                           |                                  |                     |            | SMD                                 | Var  | P-value  | SMD         | Var  | P-value  | SMD          | Var  | P-value  | SMD      | Var  | P-value  | SMD  | Var      | P-value  | SMD  | Var  | P-value      | SMD  | Var  | P-value      | SMD  | Var  | P-value     |  |  |
| SMG5     | No            | Yes            | No                                     | Up                        | 1.54                             | 0.001804            | 0.00116    | 1.45                                | 0.12 | 8.74E-04 | 0.85        | 0.04 | 8.05E-04 | 1.02         | 0.11 | 1.26E-02 | 0.51     | 0.12 | 2.93E-01 | 0.50 | 0.14     | 1.04E-01 | 0.26 | 0.20 | 4.52E-01     | 0.20 | 0.10 | 5.33E-01     | 0.16 | 0.03 | 3.62E-01    |  |  |
| TCP1L11  | No            | No             | No                                     | Up                        | 1.54                             | 0.001636            | validated  | 0.41                                | 0.10 | 1.90E-01 | 0.66        | 0.04 | 4.75E-03 | 0.66         | 0.11 | 4.31E-01 | 1.01     | 0.13 | 1.66E-02 | 0.78 | 0.15     | 1.92E-01 | 0.28 | 0.20 | 5.27E-01     | 0.64 | 0.10 | 5.05E-02     | 0.54 | 0.03 | 6.23E-03    |  |  |
| MYL3     | No            | No             | No                                     | Up                        | 1.54                             | 0.00142             | validated  | 0.66                                | 0.11 | 1.06E-01 | 0.77        | 0.04 | 7.95E-04 | 0.13         | 0.10 | 8.06E-01 | 0.45     | 0.12 | 8.12E-02 | 0.92 | 0.15     | 3.65E-01 | 0.07 | 0.20 | 8.75E-01     | 1.25 | 0.10 | 4.00E-02     | 0.71 | 0.03 | 2.05E-04    |  |  |
| EIF2AK2  | No            | Yes            | No                                     | Up                        | 1.54                             | 0.000594            | 2.6E-05    | 0.73                                | 0.11 | 1.26E-02 | 0.20        | 0.04 | 2.24E-01 | 1.21         | 0.11 | 2.31E-03 | 1.15     | 0.13 | 2.03E-03 | 0.46 | 0.14     | 7.00E-02 | 0.65 | 0.21 | 8.13E-02     | 0.44 | 0.10 | 1.00E-01     | 0.23 | 0.03 | 2.38E-01    |  |  |
| RUBCN    | No            | Yes            | No                                     | Up                        | 1.54                             | 0.009325            | 0.00086    | 0.50                                | 0.10 | 2.31E-01 | 0.79        | 0.04 | 2.47E-03 | 1.07         | 0.11 | 7.57E-03 | 0.20     | 0.11 | 5.94E-01 | 0.47 | 0.14     | 5.70E-01 | 0.63 | 0.21 | 5.33E-01     | 1.15 | 0.10 | 5.18E-03     | 0.15 | 0.03 | 3.00E-01    |  |  |
| MYLK2    | No            | No             | No                                     | Up                        | 1.54                             | 0.000754            | 0.00538    | 1.17                                | 0.11 | 3.57E-04 | 0.72        | 0.04 | 1.64E-03 | 0.03         | 0.10 | 9.40E-01 | 0.82     | 0.12 | 1.04E-02 | 0.54 | 0.14     | 6.13E-01 | 0.71 | 0.21 | 5.88E-01     | 0.44 | 0.10 | 3.61E-01     | 0.54 | 0.03 | 4.48E-03    |  |  |
| CLDN19   | No            | Yes            | Yes                                    | Up                        | 1.54                             | 1.14E-05            | 1.5E-19    | 1.98                                | 0.14 | 4.54E-07 | 1.18        | 0.04 | 1.59E-05 | 0.29         | 0.10 | 4.12E-01 | 0.51     | 0.12 | 5.15E-02 | 0.29 | 0.14     | 4.16E-01 | 0.28 | 0.20 | 4.71E-01     | 0.06 | 0.10 | 9.07E-01     | 0.39 | 0.03 | 2.48E-02    |  |  |
| YIP4     | No            | Yes            | No                                     | Up                        | 1.54                             | 0.001811            | 0.00022    | 0.81                                | 0.11 | 1.87E-02 | 0.43        | 0.04 | 2.79E-02 | 1.33         | 0.12 | 2.25E-03 | 0.82     | 0.12 | 2.18E-02 | 0.11 | 0.14     | 5.64E-01 | 0.96 | 0.22 | 2.45E-02     | 0.48 | 0.10 | 8.09E-02     | 0.03 | 0.03 | 8.29E-01    |  |  |
| DGAT2    | No            | Yes            | No                                     | Up                        | 1.54                             | 0.000379            | 4.5E-05    | 0.63                                | 0.10 | 2.79E-02 | 0.46        | 0.04 | 1.47E-02 | 0.88         | 0.11 | 9.47E-03 | 0.60     | 0.12 | 3.67E-02 | 0.56 | 0.14     | 2.84E-01 | 0.72 | 0.21 | 6.22E-01     | 0.44 | 0.10 | 1.93E-01     | 0.69 | 0.03 | 1.51E-04    |  |  |
| POLD1    | No            | No             | No                                     | Up                        | 1.54                             | 0.000925            | 0.0289     | 0.29                                | 0.10 | 3.83E-01 | 1.06        | 0.04 | 1.68E-05 | 0.29         | 0.10 | 3.68E-01 | 0.38     | 0.12 | 3.10E-01 | 0.92 | 0.15     | 4.03E-02 | 1.00 | 0.23 | 9.46E-02     | 0.33 | 0.10 | 3.21E-01     | 0.72 | 0.03 | 6.27E-03    |  |  |
| KDELC1   | No            | No             | No                                     | Up                        | 1.54                             | 0.001833            | 0.02547    | 0.31                                | 0.10 | 2.52E-01 | 0.45        | 0.04 | 2.67E-02 | 0.61         | 0.11 | 3.27E-02 | 1.30     | 0.14 | 1.12E-03 | 0.70 | 0.14     | 2.04E-01 | 0.83 | 0.22 | 1.74E-01     | 0.07 | 0.10 | 8.10E-01     | 0.71 | 0.03 | 3.46E-03    |  |  |
| SOCS5    | No            | Yes            | No                                     | Up                        | 1.54                             | 0.012483            | 0.01312    | 0.30                                | 0.10 | 3.11E-01 | 0.40        | 0.04 | 6.63E-02 | 1.15         | 0.11 | 2.87E-03 | 1.02     | 0.13 | 1.06E-02 | 0.10 | 0.14     | 7.57E-01 | 1.41 | 0.25 | 7.84E-02     | 0.31 | 0.10 | 2.40E-01     | 0.28 | 0.03 | 2.86E-01    |  |  |
| UQCRCF51 | No            | Yes            | No                                     | Up                        | 1.54                             | 0.000159            | 1.5E-19    | 0.71                                | 0.11 | 1.51E-02 | 0.21        | 0.04 | 1.72E-01 | 0.58         | 0.10 | 6.71E-02 | 1.24     | 0.13 | 6.31E-04 | 0.58 | 0.14     | 2.10E-02 | 0.78 | 0.22 | 1.45E-02     | 0.56 | 0.10 | 2.29E-02     | 0.32 | 0.03 | 1.77E-01    |  |  |
| KCTD20   | No            | No             | No                                     | Up                        | 1.54                             | 0.001839            | validated  | 0.15                                | 0.10 | 6.88E-01 | 0.20        | 0.04 | 3.68E-01 | 0.10         | 0.10 | 7.13E-01 | 1.51     | 0.14 | 2.50E-03 | 1.18 | 0.16     | 1.06E-03 | 1.04 | 0.23 | 6.00E-03     | 0.50 | 0.10 | 4.96E-02     | 0.32 | 0.03 | 1.74E-01    |  |  |
| IGSF1    | No            | Yes            | No                                     | Up                        | 1.54                             | 0.000125            | 1.5E-19    | 0.69                                | 0.11 | 3.27E-02 | 0.64        | 0.04 | 5.26E-03 | 0.22         | 0.10 | 4.85E-01 | 0.84     | 0.12 | 7.64E-03 | 0.88 | 0.15     | 3.88E-02 | 0.89 | 0.22 | 4.57E-02     | 0.14 | 0.10 | 6.44E-01     | 0.69 | 0.03 | 1.33E-04    |  |  |
| MYO23    | No            | No             | No                                     | Up                        | 1.54                             | 0.000188            | 0.02254    | 0.44                                | 0.10 | 2.51E-01 | 0.63        | 0.04 | 4.88E-04 | 0.05         | 0.10 | 8.93E-01 | 1.87     | 0.16 | 1.59E-06 | 1.15 | 0.16     | 4.53E-02 | 0.64 | 0.21 | 1.48E-01     | 0.02 | 0.10 | 9.54E-01     | 0.19 | 0.03 | 2.04E-01    |  |  |
| FAM20A   | No            | Yes            | No                                     | Up                        | 1.54                             | 4.80E-05            | 1.5E-19    | 1.10                                | 0.11 | 1.30E-04 | 0.42        | 0.04 | 7.84E-03 | 0.52         | 0.11 | 2.30E-02 | 0.28     | 0.11 | 3.09E-01 | 1.01 | 0.15     | 9.03E-02 | 0.57 | 0.21 | 2.94E-01     | 0.85 | 0.10 | 7.13E-04     | 0.24 | 0.03 | 9.36E-02    |  |  |
| BEX1     | No            | No             | No                                     | Up                        | 1.54                             | 1.83E-19            | 0.02357    | 0.13                                | 0.10 | 5.54E-01 | 0.47        | 0.04 | 1.33E-03 | 0.89         | 0.11 | 8.30E-04 | 0.78     | 0.12 | 2.25E-03 | 0.56 | 0.14     | 3.22E-02 | 1.48 | 0.25 | 2.31E-04     | 0.02 | 0.10 | 9.29E-01     | 0.69 | 0.03 | 5.95E-05    |  |  |
| MYBBH    | No            | No             | No                                     | Up                        | 1.54                             | 1.83E-19            | validated  | 0.05                                | 0.10 | 8.60E-01 | 0.59        | 0.04 | 9.18E-04 | 0.06         | 0.10 | 8.94E-01 | 1.38     | 0.14 | 8.86E-06 | 0.68 | 0.14     | 2.67E-01 | 0.43 | 0.20 | 4.00E-01     | 0.69 | 0.10 | 1.78E-01     | 1.13 | 0.04 | 1.00E-20    |  |  |
| PCDH8    | No            | Yes            | No                                     | Up                        | 1.54                             | 4.80E-05            | 5.1E-05    | 0.34                                | 0.10 | 1.96E-01 | 0.42        | 0.04 | 7.59E-02 | 1.43         | 0.12 | 8.86E-06 | 0.63     | 0.12 | 3.82E-02 | 0.22 | 0.14     | 7.90E-01 | 0.88 | 0.22 | 1.27E-01     | 0.34 | 0.10 | 1.75E-01     | 0.76 | 0.03 | 1.71E-04    |  |  |
| THY1     | No            | No             | No                                     | Up                        | 1.54                             | 3.11E-05            | 0.04072    | 0.59                                | 0.10 | 4.39E-02 | 0.55        | 0.04 | 4.26E-03 | 0.43         | 0.10 | 1.05E-01 | 0.12     | 0.11 | 7.34E-01 | 1.06 | 0.15     | 8.62E-04 | 1.01 | 0.23 | 4.20E-03     | 0.61 | 0.10 | 3.87E-02     | 0.64 | 0.03 | 3.30E-03    |  |  |
| PDUM7    | No            | Yes            | No                                     | Up                        | 1.54                             | 0.000321            | 0.00143    | 0.67                                | 0.11 | 6.10E-02 | 0.48        | 0.04 | 9.35E-03 | 0.52         | 0.11 | 6.94E-02 | 0.67     | 0.12 | 6.15E-02 | 0.42 | 0.14     | 7.45E-02 | 0.77 | 0.21 | 2.02E-02     | 1.07 | 0.10 | 8.80E-03     | 0.41 | 0.03 | 1.55E-02    |  |  |
| STARD7   | No            | Yes            | No                                     | Up                        | 1.54                             | 0.006559            | 0.00031    | 1.06                                | 0.11 | 1.56E-02 | 0.42        | 0.04 | 3.78E-02 | 0.89         | 0.11 | 5.94E-02 | 0.81     | 0.12 | 9.82E-02 | 0.82 | 0.14     | 8.31E-01 | 0.56 | 0.21 | 6.13E-02     | 1.00 | 0.10 | 6.80E-03     | 0.26 | 0.03 | 4.34E-01    |  |  |
| KIF20A   | No            | Yes            | No                                     | Up                        | 1.54                             | 2.40E-05            | 0.00116    | 0.72                                | 0.11 | 1.55E-02 | 0.67        | 0.04 | 5.42E-04 | 0.13         | 0.10 | 5.78E-01 | 0.88     | 0.12 | 7.64E-03 | 0.05 | 0.15     | 1.09E-02 | 0.65 | 0.21 | 6.54E-02     | 0.53 | 0.10 | 4.57E-02     | 0.59 | 0.03 | 3.52E-03    |  |  |
| COL4A4   | No            | Yes            | No                                     | Up                        | 1.54                             | 0.00011             | 1.5E-19    | 0.29                                | 0.10 | 2.01E-01 | 0.18        | 0.04 | 3.62E-01 | 0.89         | 0.11 | 2.37E-03 | 0.57     | 0.12 | 3.03E-02 | 0.44 | 0.14     | 6.24E-01 | 0.43 | 0.20 | 7.66E-01     | 1.92 | 0.12 | 4.54E-07     | 0.30 | 0.03 | 6.84E-02    |  |  |
| DEPDC1   | No            | Yes            | No                                     | Up                        | 1.55                             | 4.80E-05            | 6.4E-05    | 0.58                                | 0.10 | 3.61E-02 | 0.59        | 0.04 | 2.23E-03 | 0.58         | 0.11 | 2.18E-02 | 0.84     | 0.12 | 1.11E-02 | 0.61 | 0.14     | 1.93E-01 | 0.40 | 0.20 | 3.55E-01     | 0.86 | 0.10 | 2.08E-03     | 0.57 | 0.03 | 5.32E-03    |  |  |
| RGS4     | No            | No             | No                                     | Up                        | 1.55                             | 1.83E-19            | validated  | 0.59                                | 0.10 | 5.19E-02 | 0.86        | 0.04 | 2.84E-05 | 0.77         | 0.11 | 4.48E-03 | 0.35     | 0.11 | 2.22E-01 | 0.72 | 0.14     | 2.64E-02 | 0.70 | 0.21 | 3.32E-02     | 0.23 | 0.10 | 2.64E-01     | 0.75 | 0.03 | 4.32E-06    |  |  |
| ANLN     | No            | Yes            | No                                     | Up                        | 1.55                             | 6.46E-05            | 0.00191    | 0.73                                | 0.11 | 1.85E-02 | 0.61        | 0.04 | 1.25E-03 | 0.22         | 0.10 | 3.39E-01 | 0.75     | 0.12 | 1.34E-02 | 0.73 | 0.14     | 9.87E-02 | 0.72 | 0.21 | 1.35E-01     | 0.74 | 0.10 | 3.75E-03     | 0.54 | 0.03 | 4.89E-03    |  |  |
| SMC3     | No            | Yes            | No                                     | Up                        | 1.55                             | 0.001923            | 0.03333    | 0.88                                | 0.11 | 2.05E-02 | 0.25        | 0.04 | 2.06E-01 | 0.39         | 0.10 | 1.72E-01 | 0.90     | 0.12 | 2.24E-02 | 1.34 | 0.16     | 5.90E-04 | 1.03 | 0.23 | 1.06E-02     | 0.20 | 0.10 | 3.47E-01     | 0.05 | 0.03 | 7.77E-01    |  |  |
| BAP1     | No            | No             | No                                     | Up                        | 1.55                             | 0.017621            | validated  | 0.82                                | 0.11 | 3.10E-02 | 0.50        | 0.04 | 3.56E-02 | 0.09         | 0.10 | 7.88E-01 | 1.41     | 0.14 | 5.29E-03 | 0.91 | 0.15     | 5.48E-02 | 0.61 | 0.21 | 1.91E-01     | 0.49 | 0.10 | 2.71E-01     | 0.20 | 0.03 | 4.71E-01    |  |  |
| NCAM1    | No            | No             | No                                     | Up                        | 1.55                             | 0.000191            | 0.00904    | 0.51                                | 0.10 | 2.99E-01 | 0.22        | 0.04 | 3.63E-01 | 0.60         | 0.11 | 1.16E-02 | 0.70     | 0.12 | 2.79E-02 | 1.22 | 0.16     | 3.13E-03 | 1.12 | 0.23 | 7.24E-03     | 0.11 | 0.10 | 5.83E-01     | 0.57 | 0.03 | 7.93E-04    |  |  |
| CBORF76  | No            | No             | No                                     | Up                        | 1.55                             | 0.002356            | 0.01558    | 1.09                                | 0.11 | 5.25E-03 | 0.62        | 0.04 | 8.59E-03 | 0.68         | 0.11 | 6.23E-02 | 1.53     | 0.14 | 5.71E-03 | 0.02 | 0.14     | 8.44E-01 | 0.03 | 0.20 | 8.54E-01     | 0.78 | 0.10 | 3.72E-02     | 0.30 | 0.03 | 1.05E-01    |  |  |
| ZNF1     | No            | Yes            | No                                     | Up                        | 1.55                             | 0.005471            | 0.0209     | 1.01                                | 0.11 | 1.74E-02 | 0.17        | 0.04 | 3.79E-01 | 0.35         | 0.10 | 2.73E-01 | 0.79     | 0.12 | 3.73E-02 | 1.20 | 0.16     | 3.12E-04 | 0.40 | 0.20 | 2.24E-01     | 0.96 | 0.10 | 1.31E-02     | 0.17 | 0.03 | 5.41E-01    |  |  |
| ABCF3    | No            | No             | No                                     | Up                        | 1.55                             | 0.016172            | 0.03279    | 1.49                                | 0.12 | 5.01E-03 | 0.55        | 0.04 | 3.27E-02 | 0.40         | 0.10 | 3.20E-01 | 1.27     | 0.11 | 5.90E-01 | 0.86 | 0.15     | 1.01E-01 | 0.54 | 0.21 | 2.59E-01     | 0.08 | 0.10 | 8.01E-01     | 0.85 | 0.03 | 7.57E-03    |  |  |
| KCTD12   | No            | Yes            | No                                     | Up                        | 1.55                             | 2.40E-05            | 2.6E-05    | 1.06                                | 0.11 | 6.02E-04 | 0.12        | 0.04 | 4.52E-01 | 0.62         | 0.11 | 1.75E-02 | 0.12     | 0.13 | 1.03E-03 | 0.87 | 0.15     | 3.27E-03 | 0.78 | 0.22 | 1.88E-02     | 0.04 | 0.10 | 8.30E-01     | 0.45 | 0.03 | 1.72E-02    |  |  |
| SIX2     | No            | No             | No                                     | Up                        | 1.55                             | 2.40E-05            | validated  | 0.13                                | 0.10 | 6.39E-01 | 0.65        | 0.04 | 2.78E-03 | 0.22         | 0.10 | 4.28E-01 | 1.37     | 0.14 | 7.43E-05 | 0.87 | 0.15     | 1.08E-01 | 0.83 | 0.22 | 1.23E-01     | 0.19 | 0.10 | 4.62E-01     | 0.80 | 0.03 | 1.07E-05    |  |  |
| NR3C1    | No            | Yes            | No                                     | Up                        | 1.55                             | 4.80E-05            | 1.5E-19    | 0.23                                | 0.10 | 3.95E-01 | 0.70        | 0.04 | 2.59E-04 | 0.37         | 0.10 | 1.16E-01 | 1.71     | 0.15 | 1.98E-05 | 0.49 | 0.14     | 6.68E-01 | 0.60 | 0.21 | 4.63E-01     | 0.41 | 0.10 | 9.46E-02     | 0.56 | 0.03 | 3.23E-03    |  |  |
| ZNF384   | No            | No             | No                                     | Up                        | 1.55                             | 0.024343            | validated  | 0.83                                | 0.11 | 7.77E-02 |             |      |          |              |      |          |          |      |          |      |          |          |      |      |              |      |      |              |      |      |             |  |  |

**Supplementary Table 2. Details for 2,053 genes differentially expressed between EEC and NEEC, identified by microarray meta-analysis.**  
 EEC - endometrioid endometrial cancer, NEEC - non-endometrioid endometrial cancer, SMD - Standardised Mean Difference, FDR - False Discovery Rate, Var - Variance

| Gene     | 145 gene list | 1253 gene list | Associated with EEC-specific survival? | Up/Down Regulated in NEEC | average standardised fold change | Microarray Meta FDR | RNAseq FDR | Individual microarray study results |      |          |             |      |          |              |      |          |          |      |          |          |      |          |              |      |          |              |      |          |             |      |          |
|----------|---------------|----------------|----------------------------------------|---------------------------|----------------------------------|---------------------|------------|-------------------------------------|------|----------|-------------|------|----------|--------------|------|----------|----------|------|----------|----------|------|----------|--------------|------|----------|--------------|------|----------|-------------|------|----------|
|          |               |                |                                        |                           |                                  |                     |            | TCGA                                |      |          | E-MTAB-2532 |      |          | E-GEOD-56026 |      |          | GSE32507 |      |          | GSE24537 |      |          | E-GEOD-23518 |      |          | E-GEOD-17025 |      |          | E-GEOD-2109 |      |          |
|          |               |                |                                        |                           |                                  |                     |            | SMD                                 | Var  | P-value  | SMD         | Var  | P-value  | SMD          | Var  | P-value  | SMD      | Var  | P-value  | SMD      | Var  | P-value  | SMD          | Var  | P-value  | SMD          | Var  | P-value  | SMD         | Var  | P-value  |
| TRIM58   | No            | Yes            | No                                     | Up                        | 1.57                             | 0.013774            | 1.5E-19    | 0.44                                | 0.10 | 1.16E-01 | 0.29        | 0.04 | 1.52E-01 | 0.82         | 0.11 | 1.23E-02 | 0.31     | 0.11 | 2.81E-01 | 0.35     | 0.14 | 7.26E-01 | 1.36         | 0.25 | 4.18E-01 | 1.18         | 0.10 | 4.47E-02 | 0.43        | 0.03 | 4.00E-03 |
| GAB2     | No            | No             | No                                     | Up                        | 1.57                             | 0.000398            | 0.01969    | 0.55                                | 0.10 | 1.35E-01 | 0.60        | 0.04 | 2.25E-03 | 0.63         | 0.11 | 5.26E-02 | 0.42     | 0.12 | 2.56E-01 | 0.98     | 0.15 | 1.93E-02 | 0.81         | 0.22 | 1.11E-01 | 0.50         | 0.10 | 1.11E-01 | 0.69        | 0.03 | 8.55E-04 |
| AURKB    | No            | No             | No                                     | Up                        | 1.57                             | 0.000176            | validated  | 0.70                                | 0.11 | 2.79E-02 | 0.42        | 0.04 | 2.65E-02 | 0.13         | 0.10 | 5.77E-01 | 1.02     | 0.13 | 2.95E-03 | 0.76     | 0.15 | 1.84E-02 | 0.96         | 0.22 | 1.73E-02 | 0.84         | 0.10 | 2.27E-02 | 0.36        | 0.03 | 2.02E-02 |
| SUPT5H   | No            | No             | No                                     | Up                        | 1.57                             | 0.000206            | 0.01708    | 0.70                                | 0.11 | 7.02E-02 | 0.94        | 0.04 | 1.54E-04 | 0.20         | 0.10 | 6.42E-01 | 0.18     | 0.11 | 6.87E-01 | 1.31     | 0.16 | 2.44E-04 | 1.08         | 0.23 | 4.82E-03 | 0.07         | 0.10 | 8.01E-01 | 0.71        | 0.03 | 5.41E-02 |
| COX4I2   | No            | No             | No                                     | Up                        | 1.57                             | 0.001131            | 0.01204    | 1.70                                | 0.13 | 2.82E-05 | 0.49        | 0.04 | 2.77E-02 | 0.28         | 0.10 | 5.52E-01 | 0.63     | 0.12 | 3.72E-02 | 0.81     | 0.15 | 4.16E-02 | 0.30         | 0.20 | 3.82E-01 | 0.65         | 0.10 | 1.90E-01 | 0.34        | 0.03 | 1.90E-01 |
| NABP3    | No            | Yes            | No                                     | Up                        | 1.57                             | 0.004452            | 1.5E-19    | 0.63                                | 0.11 | 3.62E-02 | 0.87        | 0.04 | 2.52E-05 | 0.91         | 0.11 | 5.55E-02 | 0.50     | 0.12 | 9.81E-02 | 0.61     | 0.14 | 6.03E-01 | 0.86         | 0.22 | 5.39E-01 | 0.71         | 0.10 | 2.27E-01 | 0.10        | 0.03 | 5.69E-01 |
| DAGLA    | No            | Yes            | No                                     | Up                        | 1.57                             | 0.001348            | 0.00024    | 0.97                                | 0.11 | 1.66E-03 | 0.86        | 0.04 | 1.88E-03 | 0.18         | 0.10 | 7.02E-01 | 0.41     | 0.12 | 1.67E-01 | 0.87     | 0.15 | 1.90E-01 | 0.76         | 0.21 | 2.52E-01 | 0.64         | 0.10 | 2.04E-01 | 0.51        | 0.03 | 3.69E-03 |
| ADD2     | No            | Yes            | No                                     | Up                        | 1.57                             | 1.41E-05            | 1.5E-19    | 0.84                                | 0.11 | 5.87E-03 | 0.81        | 0.04 | 1.44E-03 | 1.19         | 0.11 | 8.99E-04 | 0.76     | 0.12 | 1.24E-02 | 0.12     | 0.14 | 9.08E-01 | 0.29         | 0.20 | 8.33E-01 | 0.56         | 0.10 | 1.64E-01 | 0.63        | 0.03 | 1.81E-04 |
| KRI1     | No            | Yes            | No                                     | Up                        | 1.57                             | 0.000951            | 0.00471    | 0.97                                | 0.11 | 1.61E-02 | 0.87        | 0.04 | 1.32E-04 | 0.92         | 0.11 | 2.61E-02 | 0.17     | 0.12 | 6.77E-01 | 0.59     | 0.14 | 1.81E-01 | 0.65         | 0.21 | 1.14E-01 | 0.79         | 0.10 | 3.66E-02 | 0.24        | 0.03 | 2.20E-01 |
| EPB4111  | No            | Yes            | No                                     | Up                        | 1.57                             | 0.000107            | 1.5E-19    | 0.90                                | 0.11 | 3.92E-03 | 0.46        | 0.04 | 1.17E-02 | 0.54         | 0.11 | 5.83E-02 | 0.13     | 0.11 | 7.02E-01 | 1.07     | 0.15 | 1.01E-01 | 0.20         | 0.20 | 5.99E-01 | 1.66         | 0.11 | 5.91E-06 | 0.26        | 0.03 | 1.01E-01 |
| DSCR8    | No            | Yes            | No                                     | Up                        | 1.57                             | 1.83E-19            | 1.5E-19    | 0.53                                | 0.10 | 1.76E-02 | 0.69        | 0.04 | 3.34E-05 | 0.12         | 0.10 | 5.25E-01 | 1.37     | 0.14 | 4.09E-06 | 0.62     | 0.14 | 4.07E-02 | 0.99         | 0.22 | 1.14E-02 | 0.12         | 0.10 | 5.50E-01 | 0.76        | 0.03 | 1.59E-06 |
| EPHB6    | No            | Yes            | No                                     | Up                        | 1.57                             | 0.001163            | 1.5E-19    | 1.07                                | 0.11 | 2.94E-03 | 0.30        | 0.04 | 6.84E-02 | 0.98         | 0.11 | 5.96E-03 | 0.52     | 0.12 | 1.02E-01 | 1.01     | 0.15 | 8.75E-03 | 0.81         | 0.22 | 9.46E-02 | 0.27         | 0.10 | 5.06E-01 | 0.25        | 0.03 | 1.93E-01 |
| COL9A1   | No            | Yes            | No                                     | Up                        | 1.57                             | 1.83E-19            | 1.5E-19    | 0.72                                | 0.11 | 2.11E-03 | 1.00        | 0.04 | 4.54E-07 | 0.86         | 0.11 | 1.11E-03 | 0.39     | 0.12 | 1.06E-01 | 0.44     | 0.14 | 1.10E-01 | 0.94         | 0.22 | 1.20E-02 | 0.65         | 0.10 | 1.31E-02 | 0.21        | 0.03 | 1.77E-01 |
| FOXP4    | No            | Yes            | No                                     | Up                        | 1.57                             | 0.002519            | 1.5E-19    | 1.59                                | 0.12 | 1.18E-03 | 0.61        | 0.04 | 3.27E-03 | 0.33         | 0.10 | 3.30E-01 | 0.41     | 0.12 | 2.20E-01 | 0.20     | 0.14 | 5.25E-01 | 1.12         | 0.23 | 1.64E-02 | 0.77         | 0.10 | 7.09E-02 | 0.19        | 0.03 | 3.10E-01 |
| PRKDC    | No            | Yes            | No                                     | Up                        | 1.57                             | 0.000108            | 0.00132    | 0.66                                | 0.11 | 6.89E-02 | 0.85        | 0.04 | 1.16E-04 | 0.96         | 0.11 | 4.55E-03 | 1.33     | 0.14 | 2.04E-03 | 0.44     | 0.14 | 1.19E-01 | 0.60         | 0.21 | 1.07E-01 | 0.07         | 0.10 | 7.40E-01 | 0.30        | 0.03 | 1.06E-01 |
| USE1     | No            | No             | No                                     | Up                        | 1.57                             | 0.01219             | 0.02831    | 1.43                                | 0.12 | 4.57E-03 | 0.56        | 0.04 | 1.26E-02 | 0.93         | 0.11 | 1.23E-02 | 0.44     | 0.12 | 2.46E-01 | 0.94     | 0.15 | 1.63E-01 | 0.63         | 0.21 | 3.32E-01 | 0.02         | 0.10 | 9.57E-01 | 0.27        | 0.03 | 2.67E-01 |
| FXR1     | No            | Yes            | Yes                                    | Up                        | 1.57                             | 0.000613            | 0.00711    | 0.95                                | 0.11 | 2.58E-02 | 0.08        | 0.04 | 6.80E-01 | 0.74         | 0.11 | 2.37E-02 | 0.86     | 0.12 | 4.02E-02 | 0.49     | 0.14 | 7.06E-02 | 0.79         | 0.22 | 2.19E-02 | 0.95         | 0.10 | 2.89E-03 | 0.36        | 0.03 | 2.74E-02 |
| TOP2A    | No            | Yes            | No                                     | Up                        | 1.57                             | 6.71E-06            | 0.00056    | 0.23                                | 0.10 | 3.97E-01 | 0.39        | 0.04 | 1.20E-02 | 0.35         | 0.10 | 1.29E-01 | 1.09     | 0.13 | 6.33E-04 | 1.16     | 0.16 | 4.48E-04 | 0.90         | 0.22 | 9.20E-03 | 0.71         | 0.10 | 6.01E-03 | 0.40        | 0.03 | 1.71E-02 |
| DCLK2    | No            | No             | No                                     | Up                        | 1.57                             | 0.005239            | validated  | 0.16                                | 0.10 | 6.70E-01 | 0.78        | 0.04 | 5.84E-04 | 0.51         | 0.10 | 1.63E-01 | 0.71     | 0.12 | 2.31E-02 | 0.61     | 0.14 | 4.30E-01 | 1.24         | 0.24 | 3.03E-01 | 0.92         | 0.10 | 2.78E-02 | 0.30        | 0.03 | 5.67E-02 |
| ACOT7    | No            | Yes            | Yes                                    | Up                        | 1.57                             | 1.14E-05            | 0.00086    | 0.81                                | 0.11 | 1.42E-02 | 0.89        | 0.04 | 2.95E-05 | 0.67         | 0.11 | 2.74E-02 | 0.64     | 0.12 | 5.01E-02 | 0.94     | 0.15 | 3.69E-03 | 0.53         | 0.21 | 8.30E-02 | 0.06         | 0.10 | 8.17E-01 | 0.69        | 0.03 | 2.39E-03 |
| ZNF167   | No            | Yes            | No                                     | Up                        | 1.57                             | 0.000159            | 0.00015    | 0.69                                | 0.11 | 3.58E-02 | 0.75        | 0.04 | 4.04E-04 | 0.76         | 0.11 | 1.07E-02 | 0.20     | 0.11 | 4.54E-01 | 0.02     | 0.14 | 9.57E-01 | 1.68         | 0.27 | 3.63E-02 | 0.68         | 0.10 | 7.32E-03 | 0.47        | 0.03 | 7.47E-03 |
| TRAP1    | No            | Yes            | No                                     | Up                        | 1.57                             | 5.41E-05            | 4E-05      | 1.05                                | 0.11 | 6.43E-03 | 0.98        | 0.04 | 1.41E-05 | 0.43         | 0.10 | 2.02E-01 | 0.57     | 0.12 | 1.29E-01 | 0.05     | 0.14 | 9.09E-01 | 0.83         | 0.22 | 3.40E-01 | 0.66         | 0.10 | 9.32E-02 | 0.66        | 0.03 | 2.63E-04 |
| RBL1     | No            | No             | No                                     | Up                        | 1.57                             | 0.002726            | 0.01236    | 0.54                                | 0.10 | 1.66E-01 | 0.58        | 0.04 | 2.63E-02 | 0.40         | 0.10 | 1.46E-01 | 0.66     | 0.12 | 5.60E-02 | 0.66     | 0.14 | 3.81E-01 | 1.02         | 0.23 | 3.13E-01 | 1.20         | 0.10 | 1.11E-04 | 0.25        | 0.03 | 1.37E-01 |
| RAB6B    | No            | No             | No                                     | Up                        | 1.58                             | 1.14E-05            | 0.00411    | 0.21                                | 0.10 | 4.84E-01 | 0.82        | 0.04 | 7.25E-05 | 0.58         | 0.11 | 3.32E-02 | 0.99     | 0.13 | 1.49E-03 | 0.30     | 0.14 | 4.03E-01 | 1.66         | 0.21 | 1.87E-01 | 1.15         | 0.10 | 2.68E-03 | 0.50        | 0.03 | 3.72E-03 |
| NUP107   | No            | Yes            | No                                     | Up                        | 1.58                             | 0.000334            | 0.00529    | 0.65                                | 0.11 | 9.64E-02 | 0.98        | 0.04 | 1.02E-04 | 0.54         | 0.11 | 1.30E-01 | 0.06     | 0.11 | 9.03E-01 | 0.59     | 0.14 | 7.67E-02 | 0.87         | 0.22 | 3.90E-02 | 0.61         | 0.10 | 5.70E-02 | 0.95        | 0.03 | 2.94E-03 |
| NPY      | No            | Yes            | No                                     | Up                        | 1.58                             | 3.58E-06            | 1.5E-19    | 0.82                                | 0.11 | 1.45E-03 | 0.88        | 0.04 | 2.95E-05 | 0.03         | 0.10 | 9.48E-01 | 0.52     | 0.12 | 6.17E-02 | 0.79     | 0.15 | 4.18E-03 | 0.65         | 0.21 | 2.96E-02 | 1.04         | 0.10 | 5.42E-02 | 0.52        | 0.03 | 3.07E-03 |
| DEPDC18  | No            | Yes            | No                                     | Up                        | 1.58                             | 3.58E-06            | 2.3E-06    | 0.92                                | 0.11 | 2.57E-03 | 0.81        | 0.04 | 5.50E-05 | 0.50         | 0.10 | 4.16E-02 | 0.35     | 0.11 | 1.85E-01 | 0.76     | 0.15 | 1.26E-01 | 0.27         | 0.20 | 6.07E-01 | 1.15         | 0.10 | 7.61E-05 | 0.49        | 0.03 | 6.95E-03 |
| NAP1L3   | No            | No             | No                                     | Up                        | 1.58                             | 9.84E-05            | 0.00175    | 0.50                                | 0.10 | 5.86E-02 | 0.49        | 0.04 | 6.41E-03 | 0.67         | 0.11 | 7.61E-03 | 0.72     | 0.12 | 1.09E-02 | 0.69     | 0.14 | 1.50E-01 | 1.12         | 0.23 | 1.51E-01 | 0.35         | 0.10 | 1.50E-01 | 0.72        | 0.03 | 5.02E-04 |
| ZBTB10   | No            | Yes            | No                                     | Up                        | 1.58                             | 0.000531            | 0.00658    | 0.59                                | 0.10 | 1.68E-01 | 0.37        | 0.04 | 4.89E-02 | 1.08         | 0.11 | 1.74E-03 | 0.90     | 0.12 | 1.59E-02 | 0.67     | 0.14 | 2.72E-01 | 1.22         | 0.20 | 7.93E-01 | 1.38         | 0.11 | 4.13E-05 | 0.05        | 0.03 | 7.33E-01 |
| NT5M     | No            | No             | No                                     | Up                        | 1.58                             | 0.020009            | validated  | 0.21                                | 0.10 | 4.65E-01 | 0.44        | 0.04 | 2.60E-02 | 1.03         | 0.11 | 2.17E-02 | 0.56     | 0.12 | 8.22E-02 | 0.83     | 0.15 | 3.28E-01 | 0.81         | 0.22 | 2.98E-01 | 1.20         | 0.10 | 1.56E-02 | 0.17        | 0.03 | 2.62E-01 |
| BARX1    | No            | No             | Yes                                    | Up                        | 1.58                             | 1.14E-05            | 0.0003     | 0.59                                | 0.10 | 1.59E-02 | 0.72        | 0.04 | 8.84E-05 | 0.08         | 0.10 | 7.61E-01 | 0.84     | 0.12 | 2.38E-03 | 0.78     | 0.15 | 2.79E-01 | 0.74         | 0.21 | 1.19E-01 | 0.92         | 0.10 | 3.21E-02 | 0.60        | 0.03 | 2.62E-04 |
| HSPB2    | No            | No             | No                                     | Up                        | 1.58                             | 1.83E-19            | 5.5E-05    | 1.09                                | 0.11 | 2.39E-04 | 0.57        | 0.04 | 6.94E-04 | 0.48         | 0.10 | 1.12E-01 | 0.65     | 0.12 | 1.15E-02 | 0.72     | 0.14 | 3.15E-02 | 0.24         | 0.20 | 3.71E-01 | 0.77         | 0.10 | 9.86E-02 | 0.73        | 0.03 | 1.16E-05 |
| RADS1AP1 | No            | Yes            | No                                     | Up                        | 1.58                             | 3.58E-06            | 4.6E-06    | 0.82                                | 0.11 | 6.43E-03 | 0.40        | 0.04 | 1.58E-02 | 0.36         | 0.10 | 1.44E-01 | 1.02     | 0.13 | 1.19E-03 | 0.31     | 0.14 | 2.28E-01 | 0.70         | 0.21 | 5.36E-02 | 0.84         | 0.10 | 2.09E-03 | 0.80        | 0.03 | 7.93E-05 |
| GNAL     | No            | No             | No                                     | Up                        | 1.58                             | 0.000935            | 0.00041    | 1.08                                | 0.11 | 5.86E-03 | 0.54        | 0.04 | 1.68E-02 | 0.08         | 0.10 | 7.16E-01 | 1.34     | 0.14 | 1.49E-04 | 0.71     | 0.14 | 4.58E-01 | 0.89         | 0.22 | 4.11E-01 | 0.19         | 0.10 | 5.13E-01 | 0.45        | 0.03 | 5.77E-03 |
| NRG4     | No            | Yes            | No                                     | Up                        | 1.58                             | 6.71E-06            | 4.3E-05    | 0.58                                | 0.10 | 2.44E-02 | 1.14        | 0.04 | 6.82E-07 | 0.84         | 0.11 | 2.58E-02 | 0.27     | 0.11 | 3.48E-01 | 0.77     | 0.15 | 1.95E-02 | 0.86         | 0.22 | 1.85E-02 | 0.27         | 0.10 | 3.56E-01 | 0.49        | 0.03 | 4.66E-03 |
| CRKL     | No            | No             | No                                     | Up                        | 1.58                             | 0.000754            | 0.0007     | 0.70                                | 0.11 | 5.87E-02 | 0.28        | 0.04 | 1.89E-01 | 0.58         | 0.11 | 7.76E-02 | 0.39     | 0.12 | 2.80E-01 | 1.20     | 0.16 | 1.03E-03 | 1.11         | 0.23 | 5.93E-03 | 0.40         | 0.10 | 1.59E-01 | 0.59        | 0.03 | 1.44E-02 |
| ATP8B2   | No            | Yes            | No                                     | Up                        | 1.58                             | 0.000349            | 0.0101     | 1.00                                | 0.11 | 5.12E-03 | 0.70        | 0.04 | 5.35E-04 | 0.49         | 0.10 | 6.65E-02 | 0.67     | 0.12 | 2.54E-02 | 0.71     | 0.14 | 8.12E-02 | 1.20         | 0.24 | 5.99E-02 | 0.03         | 0.10 | 8.92E-01 | 0.47        | 0.03 | 1.57E-02 |
| ASTE1    | No            | No             | No                                     | Up                        | 1.58                             | 0.024629            | validated  | 1.11                                |      |          |             |      |          |              |      |          |          |      |          |          |      |          |              |      |          |              |      |          |             |      |          |

**Supplementary Table 2. Details for 2,053 genes differentially expressed between EEC and NEEC, identified by microarray meta-analysis.**  
 EEC - endometrioid endometrial cancer, NEEC - non-endometrioid endometrial cancer, SMD - Standardised Mean Difference, FDR - False Discovery Rate, Var - Variance

| Gene      | 145 gene list | 1253 gene list | Associated with EEC-specific survival? | Up/Down Regulated in NEEC | average standardised fold change | Microarray Meta FDR | RNAseq FDR | Individual microarray study results |      |          |             |      |          |              |      |          |          |      |          |          |      |          |              |      |          |              |      |          |             |      |          |
|-----------|---------------|----------------|----------------------------------------|---------------------------|----------------------------------|---------------------|------------|-------------------------------------|------|----------|-------------|------|----------|--------------|------|----------|----------|------|----------|----------|------|----------|--------------|------|----------|--------------|------|----------|-------------|------|----------|
|           |               |                |                                        |                           |                                  |                     |            | TCGA                                |      |          | E-MTAB-2532 |      |          | E-GEOD-56026 |      |          | GSE32507 |      |          | GSE24537 |      |          | E-GEOD-23518 |      |          | E-GEOD-17025 |      |          | E-GEOD-2109 |      |          |
|           |               |                |                                        |                           |                                  |                     |            | SMD                                 | Var  | P-value  | SMD         | Var  | P-value  | SMD          | Var  | P-value  | SMD      | Var  | P-value  | SMD      | Var  | P-value  | SMD          | Var  | P-value  | SMD          | Var  | P-value  | SMD         | Var  | P-value  |
| CDC48     | No            | Yes            | No                                     | Up                        | 1.59                             | 1.14E-05            | 2.8E-05    | 0.98                                | 0.11 | 2.61E-03 | 0.78        | 0.04 | 6.20E-05 | 0.43         | 0.10 | 1.03E-01 | 0.60     | 0.12 | 7.52E-02 | 0.58     | 0.14 | 6.85E-02 | 0.68         | 0.21 | 6.22E-02 | 0.92         | 0.10 | 4.31E-03 | 0.43        | 0.03 | 1.41E-02 |
| PURB      | No            | No             | No                                     | Up                        | 1.60                             | 0.000185            | validated  | 0.85                                | 0.11 | 5.93E-02 | 0.76        | 0.04 | 1.80E-03 | 1.04         | 0.11 | 3.34E-03 | 0.72     | 0.12 | 7.62E-02 | 0.73     | 0.14 | 1.54E-02 | 0.51         | 0.21 | 9.79E-02 | 0.43         | 0.10 | 1.06E-01 | 0.34        | 0.03 | 4.89E-02 |
| CHTF18    | No            | Yes            | No                                     | Up                        | 1.60                             | 0.000362            | 8.5E-05    | 0.47                                | 0.10 | 1.20E-01 | 0.65        | 0.04 | 6.99E-04 | 0.51         | 0.11 | 1.32E-01 | 0.07     | 0.11 | 8.24E-01 | 0.77     | 0.15 | 2.44E-02 | 1.44         | 0.25 | 1.96E-02 | 0.95         | 0.10 | 3.33E-03 | 0.51        | 0.03 | 4.75E-02 |
| SYCP2     | No            | Yes            | No                                     | Up                        | 1.60                             | 8.51E-05            | 1.5E-19    | 0.34                                | 0.10 | 1.88E-01 | 0.81        | 0.04 | 2.08E-04 | 1.13         | 0.11 | 6.97E-04 | 0.99     | 0.13 | 1.48E-03 | 0.49     | 0.14 | 5.83E-01 | 0.55         | 0.21 | 6.08E-01 | 0.82         | 0.10 | 4.20E-02 | 0.27        | 0.03 | 6.32E-02 |
| ZBTB34    | No            | No             | No                                     | Up                        | 1.60                             | 0.014778            | 0.01133    | 0.78                                | 0.11 | 6.99E-02 | 0.56        | 0.04 | 2.35E-02 | 0.46         | 0.10 | 2.01E-01 | 0.75     | 0.12 | 7.29E-02 | 0.87     | 0.15 | 1.06E-01 | 1.20         | 0.24 | 5.55E-02 | 0.15         | 0.10 | 6.16E-01 | 0.64        | 0.03 | 4.47E-02 |
| SLN       | No            | No             | No                                     | Up                        | 1.60                             | 1.83E-19            | 0.00061    | 0.51                                | 0.10 | 4.55E-02 | 0.76        | 0.04 | 1.36E-04 | 0.47         | 0.10 | 2.03E-01 | 1.48     | 0.14 | 2.27E-06 | 1.02     | 0.15 | 4.71E-02 | 0.08         | 0.20 | 7.01E-01 | 0.44         | 0.10 | 2.72E-01 | 0.65        | 0.03 | 9.16E-05 |
| TSPAN7    | No            | Yes            | No                                     | Up                        | 1.60                             | 3.58E-06            | 1.5E-19    | 0.75                                | 0.11 | 3.63E-03 | 0.73        | 0.04 | 8.31E-01 | 0.43         | 0.10 | 5.76E-02 | 0.32     | 0.11 | 2.04E-01 | 1.38     | 0.17 | 7.56E-05 | 1.60         | 0.26 | 8.81E-05 | 0.42         | 0.10 | 6.70E-02 | 0.49        | 0.03 | 5.08E-03 |
| LRRCC3    | No            | No             | No                                     | Up                        | 1.60                             | 0.003014            | 0.00842    | 0.43                                | 0.10 | 2.27E-01 | 0.13        | 0.04 | 6.39E-01 | 0.61         | 0.11 | 1.71E-02 | 0.67     | 0.12 | 5.30E-02 | 1.34     | 0.16 | 5.40E-03 | 0.95         | 0.22 | 5.71E-02 | 0.89         | 0.10 | 3.77E-02 | 0.41        | 0.03 | 1.29E-02 |
| SPEF      | No            | Yes            | No                                     | Up                        | 1.60                             | 1.83E-19            | 1.5E-19    | 1.46                                | 0.12 | 2.77E-05 | 0.71        | 0.04 | 2.48E-05 | 0.71         | 0.11 | 3.17E-02 | 0.96     | 0.13 | 7.28E-04 | 0.45     | 0.14 | 2.30E-01 | 1.17         | 0.20 | 6.02E-01 | 0.50         | 0.10 | 1.66E-01 | 0.46        | 0.03 | 9.76E-03 |
| RECK      | No            | No             | No                                     | Up                        | 1.60                             | 9.98E-05            | validated  | 0.61                                | 0.10 | 5.98E-02 | 0.48        | 0.04 | 5.66E-03 | 0.35         | 0.10 | 1.52E-01 | 1.42     | 0.14 | 7.07E-05 | 1.02     | 0.15 | 2.40E-02 | 0.71         | 0.21 | 1.16E-01 | 0.75         | 0.10 | 1.21E-02 | 0.10        | 0.03 | 4.88E-01 |
| SUSD4     | No            | Yes            | No                                     | Up                        | 1.60                             | 6.71E-06            | 2.3E-06    | 1.76                                | 0.13 | 6.82E-07 | 0.36        | 0.04 | 3.50E-02 | 0.59         | 0.11 | 2.53E-02 | 0.56     | 0.12 | 3.67E-02 | 0.53     | 0.14 | 1.75E-01 | 0.63         | 0.21 | 1.64E-01 | 0.57         | 0.10 | 2.93E-02 | 0.44        | 0.03 | 7.40E-03 |
| KCNIG1    | No            | Yes            | No                                     | Up                        | 1.60                             | 1.14E-05            | 2E-05      | 1.07                                | 0.11 | 3.29E-04 | 0.19        | 0.04 | 1.44E-01 | 0.67         | 0.11 | 1.87E-02 | 1.02     | 0.13 | 2.64E-04 | 0.15     | 0.14 | 4.07E-01 | 1.75         | 0.28 | 4.56E-03 | 0.09         | 0.10 | 7.30E-01 | 0.49        | 0.03 | 2.79E-03 |
| RSAD2     | No            | Yes            | No                                     | Up                        | 1.60                             | 1.83E-19            | 1.5E-19    | 1.25                                | 0.12 | 4.20E-05 | 0.87        | 0.04 | 7.27E-06 | 0.95         | 0.11 | 7.33E-04 | 0.16     | 0.11 | 4.99E-01 | 0.65     | 0.14 | 4.21E-02 | 0.12         | 0.20 | 6.30E-01 | 0.71         | 0.10 | 3.88E-03 | 0.72        | 0.03 | 1.36E-04 |
| LDOC1     | No            | No             | No                                     | Up                        | 1.60                             | 3.58E-06            | 0.00354    | 1.02                                | 0.11 | 8.72E-04 | 0.73        | 0.04 | 1.28E-03 | 0.91         | 0.11 | 1.04E-03 | 0.28     | 0.11 | 3.32E-01 | 1.00     | 0.15 | 2.62E-03 | 1.04         | 0.23 | 3.73E-03 | 0.00         | 0.10 | 9.99E-01 | 0.46        | 0.03 | 6.76E-03 |
| OBSL1     | No            | Yes            | No                                     | Up                        | 1.60                             | 1.66E-05            | 0.00711    | 0.63                                | 0.10 | 1.95E-02 | 0.41        | 0.04 | 1.23E-02 | 0.80         | 0.11 | 6.39E-03 | 0.38     | 0.12 | 1.91E-01 | 0.94     | 0.15 | 2.38E-01 | 0.65         | 0.21 | 4.53E-01 | 0.78         | 0.10 | 9.80E-03 | 0.85        | 0.03 | 7.04E-06 |
| LOC440356 | No            | No             | No                                     | Up                        | 1.60                             | 0.000175            | 0.00024    | 0.68                                | 0.11 | 9.31E-03 | 0.99        | 0.04 | 2.31E-04 | 1.04         | 0.11 | 1.12E-02 | 0.96     | 0.13 | 6.40E-03 | 0.66     | 0.14 | 5.44E-01 | 0.27         | 0.20 | 6.36E-01 | 0.40         | 0.10 | 3.23E-01 | 0.44        | 0.03 | 1.11E-02 |
| CTORF31   | No            | Yes            | No                                     | Up                        | 1.60                             | 0.000125            | 4.6E-06    | 0.55                                | 0.10 | 8.11E-02 | 0.78        | 0.04 | 5.63E-04 | 1.06         | 0.11 | 5.06E-03 | 0.64     | 0.12 | 3.72E-02 | 0.42     | 0.14 | 7.54E-01 | 0.59         | 0.21 | 7.06E-01 | 0.57         | 0.10 | 7.72E-02 | 0.84        | 0.03 | 2.62E-04 |
| PTPA43    | No            | Yes            | No                                     | Up                        | 1.60                             | 6.71E-06            | 6.7E-06    | 1.34                                | 0.12 | 3.02E-04 | 0.87        | 0.04 | 5.68E-05 | 0.52         | 0.11 | 5.58E-02 | 0.56     | 0.12 | 6.18E-02 | 0.79     | 0.15 | 1.84E-02 | 0.60         | 0.21 | 7.78E-02 | 0.20         | 0.10 | 4.39E-01 | 0.56        | 0.03 | 4.39E-03 |
| SGCE      | No            | Yes            | No                                     | Up                        | 1.60                             | 1.83E-19            | 0.00076    | 0.80                                | 0.11 | 3.90E-03 | 0.31        | 0.04 | 4.14E-02 | 0.34         | 0.10 | 1.41E-01 | 0.94     | 0.12 | 1.40E-03 | 0.90     | 0.15 | 3.06E-03 | 0.68         | 0.21 | 3.32E-02 | 0.59         | 0.10 | 1.65E-02 | 0.90        | 0.03 | 3.41E-05 |
| RTN2      | No            | Yes            | No                                     | Up                        | 1.60                             | 3.58E-06            | 6E-05      | 0.84                                | 0.11 | 1.05E-02 | 1.09        | 0.04 | 9.31E-06 | 0.13         | 0.10 | 6.58E-01 | 1.14     | 0.13 | 1.12E-03 | 0.32     | 0.14 | 3.39E-01 | 0.34         | 0.20 | 3.85E-01 | 0.89         | 0.10 | 2.86E-02 | 0.68        | 0.03 | 8.06E-05 |
| PRNP      | No            | Yes            | Yes                                    | Up                        | 1.60                             | 3.58E-06            | 0.00015    | 0.53                                | 0.10 | 1.12E-01 | 0.34        | 0.04 | 3.50E-02 | 1.35         | 0.12 | 4.36E-05 | 0.92     | 0.12 | 4.09E-03 | 0.68     | 0.14 | 1.03E-02 | 0.45         | 0.21 | 9.90E-02 | 0.58         | 0.10 | 1.73E-02 | 0.59        | 0.03 | 2.78E-03 |
| HDX       | No            | Yes            | No                                     | Up                        | 1.60                             | 2.64E-05            | 1.5E-19    | 1.11                                | 0.11 | 5.09E-04 | 0.86        | 0.04 | 8.05E-04 | 0.71         | 0.11 | 1.87E-02 | 0.71     | 0.12 | 9.08E-03 | 0.31     | 0.14 | 7.47E-01 | 0.52         | 0.21 | 6.93E-01 | 0.70         | 0.10 | 7.50E-02 | 0.53        | 0.03 | 1.95E-03 |
| NEFH      | No            | Yes            | No                                     | Up                        | 1.60                             | 1.83E-19            | 6.4E-05    | 0.65                                | 0.11 | 5.69E-03 | 0.70        | 0.04 | 1.98E-05 | 0.37         | 0.10 | 8.50E-02 | 0.52     | 0.12 | 3.03E-02 | 0.79     | 0.15 | 8.07E-03 | 0.82         | 0.22 | 2.97E-02 | 0.83         | 0.10 | 1.88E-03 | 0.77        | 0.03 | 2.04E-06 |
| ALKBH3    | No            | Yes            | No                                     | Up                        | 1.60                             | 3.97E-05            | 6.7E-06    | 1.08                                | 0.11 | 3.61E-04 | 0.55        | 0.04 | 5.21E-03 | 0.93         | 0.11 | 3.53E-03 | 0.32     | 0.11 | 2.16E-01 | 0.66     | 0.14 | 8.39E-02 | 1.43         | 0.25 | 5.40E-03 | 0.14         | 0.10 | 5.43E-01 | 0.35        | 0.03 | 2.38E-02 |
| ERF       | No            | Yes            | No                                     | Up                        | 1.61                             | 0.002356            | 1.5E-19    | 0.73                                | 0.11 | 4.54E-02 | 1.00        | 0.04 | 4.73E-04 | 0.40         | 0.10 | 2.23E-01 | 0.22     | 0.11 | 5.20E-01 | 1.01     | 0.15 | 2.73E-02 | 1.17         | 0.23 | 3.83E-02 | 0.82         | 0.10 | 3.86E-02 | 0.12        | 0.03 | 4.46E-01 |
| GPR20     | No            | No             | No                                     | Up                        | 1.61                             | 0.000125            | 1.5E-19    | 0.84                                | 0.11 | 1.74E-02 | 0.64        | 0.04 | 4.20E-04 | 0.52         | 0.11 | 1.92E-01 | 0.53     | 0.12 | 4.76E-02 | 1.18     | 0.16 | 3.41E-01 | 0.72         | 0.21 | 2.56E-01 | 0.28         | 0.10 | 4.09E-01 | 0.77        | 0.03 | 3.79E-05 |
| CEBPB     | No            | Yes            | No                                     | Up                        | 1.61                             | 3.97E-05            | 1.9E-05    | 1.23                                | 0.12 | 1.57E-03 | 0.27        | 0.04 | 1.25E-01 | 1.08         | 0.11 | 1.73E-03 | 0.44     | 0.12 | 2.08E-01 | 0.86     | 0.15 | 2.52E-03 | 0.30         | 0.20 | 2.15E-01 | 1.13         | 0.10 | 6.05E-04 | 0.16        | 0.03 | 4.14E-01 |
| PLEKHM2   | No            | Yes            | No                                     | Up                        | 1.61                             | 0.003975            | validated  | 0.52                                | 0.10 | 2.02E-01 | 0.88        | 0.04 | 2.28E-03 | 0.42         | 0.10 | 2.70E-01 | 0.98     | 0.13 | 8.38E-02 | 0.77     | 0.15 | 1.15E-02 | 0.58         | 0.21 | 9.97E-02 | 1.08         | 0.10 | 3.56E-02 | 0.24        | 0.03 | 3.74E-01 |
| BIN1      | No            | Yes            | No                                     | Up                        | 1.61                             | 1.14E-05            | 7.4E-05    | 0.92                                | 0.11 | 7.10E-03 | 0.73        | 0.04 | 7.61E-04 | 0.31         | 0.10 | 3.34E-01 | 0.16     | 0.11 | 5.88E-01 | 1.57     | 0.17 | 5.07E-05 | 0.73         | 0.21 | 2.99E-02 | 0.48         | 0.10 | 1.49E-01 | 0.59        | 0.03 | 3.11E-03 |
| C10RF85   | No            | Yes            | Yes                                    | Up                        | 1.61                             | 0.000121            | 0.00108    | 1.29                                | 0.12 | 9.60E-04 | 0.52        | 0.04 | 1.34E-02 | 0.64         | 0.11 | 3.82E-02 | 0.86     | 0.12 | 4.97E-02 | 0.99     | 0.15 | 1.77E-03 | 0.57         | 0.21 | 7.24E-02 | 0.13         | 0.10 | 6.09E-01 | 0.49        | 0.03 | 4.47E-02 |
| PLEKHG4   | No            | Yes            | No                                     | Up                        | 1.61                             | 1.83E-19            | 1.5E-19    | 0.59                                | 0.10 | 1.80E-02 | 0.94        | 0.04 | 3.86E-06 | 0.24         | 0.10 | 3.60E-01 | 0.20     | 0.11 | 4.39E-01 | 0.49     | 0.14 | 1.75E-01 | 1.37         | 0.25 | 6.57E-03 | 0.75         | 0.10 | 9.35E-03 | 0.91        | 0.03 | 9.63E-05 |
| ZNF250    | No            | No             | No                                     | Up                        | 1.61                             | 0.000334            | 0.01237    | 2.09                                | 0.14 | 1.64E-05 | 1.03        | 0.04 | 1.16E-04 | 0.49         | 0.10 | 1.36E-01 | 0.53     | 0.12 | 2.68E-01 | 0.71     | 0.14 | 1.09E-01 | 0.00         | 0.20 | 1.00E+00 | 0.44         | 0.10 | 2.03E-01 | 0.19        | 0.03 | 3.74E-01 |
| SLC25A32  | No            | No             | No                                     | Up                        | 1.61                             | 0.006384            | validated  | 0.99                                | 0.11 | 9.34E-03 | 0.66        | 0.04 | 9.21E-03 | 0.57         | 0.11 | 9.61E-02 | 1.07     | 0.13 | 2.56E-02 | 0.64     | 0.14 | 6.25E-01 | 0.49         | 0.21 | 7.57E-01 | 0.69         | 0.10 | 2.28E-02 | 0.38        | 0.03 | 2.13E-01 |
| TSPAN18   | No            | Yes            | No                                     | Up                        | 1.61                             | 6.71E-06            | 4.3E-05    | 0.80                                | 0.11 | 5.11E-02 | 0.32        | 0.04 | 6.41E-02 | 0.23         | 0.10 | 3.72E-01 | 1.59     | 0.15 | 3.65E-06 | 0.37     | 0.14 | 1.43E-01 | 0.47         | 0.21 | 1.48E-01 | 0.99         | 0.10 | 2.70E-02 | 0.73        | 0.03 | 3.54E-05 |
| RNF40     | No            | No             | No                                     | Up                        | 1.61                             | 0.006333            | validated  | 0.83                                | 0.11 | 7.56E-02 | 0.49        | 0.04 | 5.40E-02 | 1.22         | 0.13 | 2.72E-02 | 1.27     | 0.16 | 1.50E-03 | 0.97     | 0.22 | 2.89E-02 | 0.35         | 0.10 | 3.07E-01 | 0.12         | 0.03 | 4.98E-01 | 0.12        | 0.03 | 1.72E-01 |
| KIF5C     | No            | No             | No                                     | Up                        | 1.61                             | 1.83E-19            | 0.00182    | 0.22                                | 0.10 | 4.67E-01 | 0.87        | 0.04 | 5.91E-06 | 1.07         | 0.11 | 2.91E-04 | 0.77     | 0.12 | 5.37E-03 | 1.01     | 0.15 | 9.00E-03 | 0.90         | 0.22 | 2.33E-02 | 0.13         | 0.10 | 5.34E-01 | 0.52        | 0.03 | 7.70E-04 |
| ZNF343    | No            | No             | Yes                                    | Up                        | 1.61                             | 0.006516            | 0.011      | 0.75                                | 0.11 | 5.33E-02 | 0.56        | 0.04 | 2.73E-02 | 1.57         | 0.12 | 8.81E-04 | 0.39     | 0.12 | 3.07E-01 | 0.46     | 0.14 | 5.77E-01 | 0.65         | 0.21 | 4.26E-01 | 0.89         | 0.10 | 3.07E-02 | 0.22        | 0.03 | 1.72E-01 |
| MCAM      | No            | No             | No                                     | Up                        | 1.62                             | 0.000178            | validated  | 0.56                                | 0.10 | 8        |             |      |          |              |      |          |          |      |          |          |      |          |              |      |          |              |      |          |             |      |          |

**Supplementary Table 2. Details for 2,053 genes differentially expressed between EEC and NEEC, identified by microarray meta-analysis.**  
 EEC - endometrioid endometrial cancer, NEEC - non-endometrioid endometrial cancer, SMD - Standardised Mean Difference, FDR - False Discovery Rate, Var - Variance

| Gene    | 145 gene list | 1253 gene list | Associated with EEC-specific survival? | Up/Down Regulated in NEEC | average standardised fold change | Microarray Meta FDR | RNAseq FDR | Individual microarray study results |      |          |             |      |          |              |      |          |          |      |          |      |          |          |      |      |              |      |      |              |      |      |             |  |  |
|---------|---------------|----------------|----------------------------------------|---------------------------|----------------------------------|---------------------|------------|-------------------------------------|------|----------|-------------|------|----------|--------------|------|----------|----------|------|----------|------|----------|----------|------|------|--------------|------|------|--------------|------|------|-------------|--|--|
|         |               |                |                                        |                           |                                  |                     |            | TCGA                                |      |          | E-MTAB-2532 |      |          | E-GEOD-56026 |      |          | GSE32507 |      |          |      | GSE24537 |          |      |      | E-GEOD-23518 |      |      | E-GEOD-17025 |      |      | E-GEOD-2109 |  |  |
|         |               |                |                                        |                           |                                  |                     |            | SMD                                 | Var  | P-value  | SMD         | Var  | P-value  | SMD          | Var  | P-value  | SMD      | Var  | P-value  | SMD  | Var      | P-value  | SMD  | Var  | P-value      | SMD  | Var  | P-value      | SMD  | Var  | P-value     |  |  |
| PCOLCE  | No            | No             | No                                     | Up                        | 1.63                             | 1.83E-19            | validated  | 0.39                                | 0.10 | 1.16E-01 | 0.59        | 0.04 | 7.55E-04 | 0.36         | 0.10 | 1.33E-01 | 1.92     | 0.16 | 1.36E-06 | 0.81 | 0.15     | 4.10E-03 | 0.76 | 0.21 | 1.92E-02     | 0.12 | 0.10 | 6.12E-01     | 0.69 | 0.03 | 2.19E-04    |  |  |
| ST8SIA5 | No            | Yes            | No                                     | Up                        | 1.64                             | 0.000125            | 1.5E-19    | 0.94                                | 0.11 | 8.64E-03 | 1.25        | 0.04 | 6.82E-07 | 0.57         | 0.11 | 2.55E-01 | 0.32     | 0.11 | 2.66E-01 | 0.66 | 0.14     | 9.99E-02 | 0.94 | 0.22 | 1.84E-01     | 0.73 | 0.10 | 1.12E-01     | 0.27 | 0.03 | 1.07E-01    |  |  |
| ZNF512B | No            | Yes            | No                                     | Up                        | 1.64                             | 2.85E-05            | 0.00253    | 0.97                                | 0.11 | 1.40E-02 | 0.97        | 0.04 | 8.95E-05 | 0.79         | 0.11 | 7.64E-03 | 0.07     | 0.11 | 8.26E-01 | 0.69 | 0.14     | 1.37E-01 | 0.61 | 0.21 | 2.33E-01     | 1.40 | 0.11 | 6.47E-05     | 0.19 | 0.03 | 3.80E-01    |  |  |
| POLR2D  | No            | No             | No                                     | Up                        | 1.64                             | 0.000188            | validated  | 0.74                                | 0.11 | 6.46E-02 | 0.85        | 0.04 | 5.60E-04 | 0.88         | 0.11 | 1.17E-02 | 1.11     | 0.13 | 1.94E-02 | 0.35 | 0.14     | 2.11E-01 | 0.56 | 0.21 | 1.19E-01     | 0.33 | 0.10 | 2.16E-01     | 0.87 | 0.03 | 5.04E-03    |  |  |
| TMEM100 | No            | No             | No                                     | Up                        | 1.64                             | 1.83E-19            | 0.00114    | 0.54                                | 0.10 | 3.33E-02 | 0.72        | 0.04 | 5.95E-05 | 0.59         | 0.11 | 1.27E-02 | 0.79     | 0.12 | 3.80E-03 | 0.71 | 0.14     | 3.65E-02 | 1.32 | 0.24 | 3.40E-03     | 0.25 | 0.10 | 2.39E-01     | 0.77 | 0.03 | 2.48E-05    |  |  |
| PSMD2   | No            | Yes            | No                                     | Up                        | 1.64                             | 0.000712            | 0.00424    | 1.43                                | 0.12 | 9.50E-04 | 0.23        | 0.04 | 1.68E-01 | 0.75         | 0.11 | 4.38E-02 | 1.57     | 0.15 | 2.37E-03 | 0.37 | 0.14     | 1.29E-01 | 0.54 | 0.21 | 7.43E-02     | 0.04 | 0.10 | 8.90E-01     | 0.77 | 0.03 | 2.02E-02    |  |  |
| MCOLN3  | No            | Yes            | No                                     | Up                        | 1.64                             | 5.03E-05            | 1.5E-19    | 1.12                                | 0.11 | 1.48E-03 | 0.27        | 0.04 | 1.88E-01 | 0.96         | 0.11 | 5.04E-04 | 0.34     | 0.11 | 2.70E-01 | 0.67 | 0.14     | 6.46E-02 | 1.33 | 0.24 | 4.24E-02     | 0.60 | 0.10 | 1.60E-02     | 0.40 | 0.03 | 1.19E-02    |  |  |
| MYH6    | No            | Yes            | No                                     | Up                        | 1.64                             | 1.83E-19            | 1.5E-19    | 0.78                                | 0.11 | 4.39E-02 | 1.17        | 0.04 | 1.36E-06 | 0.06         | 0.10 | 8.96E-01 | 0.89     | 0.12 | 1.73E-03 | 0.91 | 0.15     | 2.88E-01 | 0.80 | 0.22 | 1.15E-01     | 0.26 | 0.10 | 4.76E-01     | 0.83 | 0.03 | 7.72E-06    |  |  |
| CEBP6   | No            | Yes            | No                                     | Up                        | 1.64                             | 0.000108            | 7.8E-05    | 0.76                                | 0.11 | 1.98E-02 | 0.58        | 0.04 | 4.46E-03 | 0.68         | 0.11 | 1.78E-02 | 0.83     | 0.12 | 5.40E-02 | 1.13 | 0.16     | 6.11E-03 | 0.68 | 0.21 | 5.00E-02     | 0.54 | 0.10 | 6.01E-02     | 0.50 | 0.03 | 4.81E-02    |  |  |
| CTSF    | No            | Yes            | No                                     | Up                        | 1.64                             | 1.14E-05            | 0.00133    | 0.61                                | 0.10 | 2.39E-02 | 0.42        | 0.04 | 1.09E-02 | 1.02         | 0.11 | 3.58E-03 | 1.01     | 0.13 | 3.12E-03 | 1.05 | 0.15     | 2.39E-03 | 0.86 | 0.22 | 2.04E-02     | 0.32 | 0.10 | 2.06E-01     | 0.41 | 0.03 | 5.59E-02    |  |  |
| TIGD5   | No            | No             | Yes                                    | Up                        | 1.64                             | 0.000209            | 0.00726    | 0.97                                | 0.11 | 9.06E-03 | 1.13        | 0.04 | 1.86E-05 | 0.52         | 0.11 | 1.82E-01 | 0.41     | 0.12 | 2.87E-01 | 0.59 | 0.14     | 6.37E-02 | 0.64 | 0.21 | 1.09E-01     | 1.43 | 0.11 | 4.34E-03     | 0.01 | 0.03 | 9.38E-01    |  |  |
| FADS3   | No            | Yes            | No                                     | Up                        | 1.64                             | 0.001301            | 7.7E-05    | 0.96                                | 0.11 | 6.61E-03 | 0.69        | 0.04 | 1.98E-03 | 0.96         | 0.11 | 1.40E-02 | 0.67     | 0.12 | 1.21E-01 | 0.74 | 0.14     | 5.38E-01 | 0.51 | 0.21 | 5.80E-01     | 0.79 | 0.10 | 4.81E-02     | 0.39 | 0.03 | 3.69E-02    |  |  |
| LIN37   | No            | No             | No                                     | Up                        | 1.64                             | 0.018189            | validated  | 1.23                                | 0.12 | 1.89E-03 | 0.58        | 0.04 | 1.06E-02 | 0.46         | 0.10 | 1.68E-01 | 0.18     | 0.11 | 6.79E-01 | 1.41 | 0.17     | 8.33E-02 | 1.60 | 0.26 | 9.61E-02     | 0.12 | 0.10 | 6.95E-01     | 0.11 | 0.03 | 5.28E-01    |  |  |
| LOXL1   | No            | Yes            | No                                     | Up                        | 1.64                             | 2.64E-05            | 0.0005     | 0.64                                | 0.11 | 1.33E-02 | 0.59        | 0.04 | 1.75E-03 | 0.50         | 0.10 | 5.79E-02 | 0.87     | 0.12 | 9.50E-03 | 1.05 | 0.15     | 2.33E-02 | 1.28 | 0.24 | 1.71E-02     | 0.09 | 0.10 | 7.14E-01     | 0.71 | 0.03 | 1.35E-03    |  |  |
| FOXP1   | No            | Yes            | No                                     | Up                        | 1.64                             | 0.000188            | 9.3E-05    | 0.75                                | 0.11 | 8.12E-02 | 0.31        | 0.04 | 5.78E-02 | 0.73         | 0.11 | 1.98E-02 | 0.55     | 0.12 | 1.52E-01 | 1.51 | 0.17     | 1.69E-04 | 1.27 | 0.24 | 2.24E-03     | 0.57 | 0.10 | 5.29E-02     | 0.04 | 0.03 | 7.93E-01    |  |  |
| SALL4   | No            | Yes            | No                                     | Up                        | 1.64                             | 1.83E-19            | 1.5E-19    | 0.57                                | 0.10 | 2.55E-02 | 1.22        | 0.04 | 1.00E-20 | 0.56         | 0.11 | 7.01E-02 | 0.42     | 0.12 | 8.75E-02 | 0.80 | 0.15     | 1.86E-01 | 1.13 | 0.23 | 8.01E-02     | 0.10 | 0.10 | 6.84E-01     | 0.92 | 0.03 | 2.27E-07    |  |  |
| ZNF34   | No            | No             | No                                     | Up                        | 1.64                             | 0.004289            | validated  | 0.90                                | 0.11 | 1.34E-02 | 0.56        | 0.04 | 2.83E-02 | 0.84         | 0.11 | 6.64E-02 | 0.91     | 0.12 | 7.11E-02 | 0.72 | 0.14     | 1.11E-01 | 0.56 | 0.21 | 2.20E-01     | 0.90 | 0.10 | 2.28E-02     | 0.34 | 0.03 | 1.91E-01    |  |  |
| PDCD5   | No            | Yes            | Yes                                    | Up                        | 1.64                             | 1.14E-05            | 5.6E-05    | 1.07                                | 0.11 | 4.47E-03 | 0.91        | 0.04 | 8.34E-05 | 0.90         | 0.11 | 5.29E-03 | 0.44     | 0.12 | 2.55E-01 | 0.88 | 0.15     | 2.24E-03 | 0.50 | 0.21 | 9.15E-02     | 0.61 | 0.10 | 1.22E-01     | 0.42 | 0.03 | 6.44E-02    |  |  |
| GPX3    | No            | Yes            | No                                     | Up                        | 1.64                             | 1.83E-19            | 0.0001     | 1.39                                | 0.12 | 3.00E-05 | 0.56        | 0.04 | 6.05E-04 | 0.66         | 0.11 | 7.28E-03 | 0.81     | 0.12 | 8.07E-03 | 1.25 | 0.16     | 1.41E-04 | 0.28 | 0.20 | 2.64E-01     | 0.42 | 0.10 | 5.40E-02     | 0.37 | 0.03 | 2.02E-02    |  |  |
| HPSE    | No            | Yes            | No                                     | Up                        | 1.64                             | 5.26E-05            | 1.5E-19    | 0.84                                | 0.11 | 4.41E-03 | 0.38        | 0.04 | 4.27E-02 | 0.53         | 0.11 | 4.78E-02 | 1.33     | 0.14 | 1.87E-04 | 1.16 | 0.16     | 5.06E-02 | 0.34 | 0.20 | 6.93E-01     | 0.72 | 0.10 | 1.58E-02     | 0.45 | 0.03 | 1.78E-02    |  |  |
| ALX1    | No            | Yes            | No                                     | Up                        | 1.64                             | 0.000707            | 1.5E-19    | 0.26                                | 0.10 | 3.34E-01 | 0.72        | 0.04 | 1.65E-02 | 0.57         | 0.11 | 1.49E-01 | 0.34     | 0.11 | 1.90E-01 | 1.11 | 0.16     | 2.51E-01 | 0.97 | 0.22 | 2.92E-01     | 0.99 | 0.10 | 2.15E-02     | 0.78 | 0.03 | 1.14E-05    |  |  |
| VEGFB   | No            | No             | No                                     | Up                        | 1.64                             | 0.000502            | validated  | 1.69                                | 0.13 | 2.69E-04 | 0.26        | 0.04 | 2.35E-01 | 0.72         | 0.11 | 5.74E-02 | 0.61     | 0.12 | 1.65E-01 | 1.10 | 0.15     | 5.91E-04 | 0.51 | 0.21 | 8.20E-02     | 0.74 | 0.10 | 6.97E-02     | 0.11 | 0.03 | 6.17E-01    |  |  |
| SNTA1   | No            | Yes            | No                                     | Up                        | 1.64                             | 9.98E-05            | 0.00587    | 0.61                                | 0.10 | 3.17E-02 | 0.86        | 0.04 | 6.16E-05 | 0.95         | 0.11 | 1.42E-02 | 0.64     | 0.12 | 4.08E-02 | 0.98 | 0.15     | 6.09E-02 | 0.40 | 0.20 | 3.46E-01     | 0.71 | 0.10 | 1.25E-01     | 0.59 | 0.03 | 1.94E-02    |  |  |
| DPIF1   | No            | No             | No                                     | Up                        | 1.65                             | 0.000888            | 0.00634    | 0.56                                | 0.10 | 1.08E-01 | 0.65        | 0.04 | 2.08E-02 | 0.20         | 0.10 | 6.70E-01 | 1.50     | 0.14 | 3.24E-04 | 0.38 | 0.14     | 4.75E-01 | 1.02 | 0.23 | 2.07E-01     | 0.76 | 0.10 | 1.07E-01     | 0.69 | 0.03 | 9.96E-04    |  |  |
| ADIPOR2 | No            | No             | No                                     | Up                        | 1.65                             | 0.001612            | validated  | 1.20                                | 0.11 | 3.09E-02 | 0.12        | 0.04 | 5.81E-01 | 0.32         | 0.10 | 3.85E-01 | 1.22     | 0.13 | 9.10E-04 | 0.77 | 0.15     | 2.48E-02 | 0.79 | 0.22 | 4.87E-02     | 0.46 | 0.10 | 1.44E-01     | 0.88 | 0.03 | 1.77E-02    |  |  |
| PGS1    | No            | Yes            | No                                     | Up                        | 1.65                             | 0.003128            | 0.00079    | 1.00                                | 0.11 | 6.96E-03 | 0.25        | 0.04 | 2.13E-01 | 1.25         | 0.12 | 5.19E-03 | 0.51     | 0.12 | 2.16E-01 | 1.21 | 0.16     | 2.57E-02 | 0.61 | 0.21 | 1.68E-01     | 0.66 | 0.10 | 9.94E-02     | 0.27 | 0.03 | 1.28E-01    |  |  |
| SOX12   | No            | Yes            | Yes                                    | Up                        | 1.65                             | 3.34E-05            | 0.00011    | 1.12                                | 0.11 | 2.67E-03 | 1.18        | 0.04 | 1.23E-05 | 0.81         | 0.11 | 1.10E-02 | 0.37     | 0.11 | 2.65E-01 | 0.16 | 0.14     | 7.62E-01 | 0.92 | 0.22 | 3.60E-01     | 0.53 | 0.10 | 1.51E-01     | 0.68 | 0.03 | 1.81E-03    |  |  |
| ANKRD27 | No            | Yes            | No                                     | Up                        | 1.65                             | 0.000586            | 1.5E-19    | 1.21                                | 0.11 | 1.14E-03 | 0.87        | 0.04 | 6.84E-04 | 0.66         | 0.11 | 4.80E-02 | 0.97     | 0.13 | 3.61E-02 | 0.33 | 0.14     | 6.43E-01 | 0.60 | 0.21 | 5.03E-01     | 0.42 | 0.10 | 1.96E-01     | 0.69 | 0.03 | 2.05E-02    |  |  |
| TPPRT   | No            | Yes            | No                                     | Up                        | 1.65                             | 1.14E-05            | 1.5E-19    | 1.25                                | 0.12 | 3.09E-04 | 0.43        | 0.04 | 6.02E-03 | 0.49         | 0.10 | 1.58E-01 | 0.80     | 0.12 | 1.92E-03 | 0.44 | 0.14     | 4.78E-01 | 0.72 | 0.21 | 4.97E-01     | 0.94 | 0.10 | 4.59E-02     | 0.71 | 0.03 | 5.29E-05    |  |  |
| GTF2H4  | No            | No             | No                                     | Up                        | 1.65                             | 0.001594            | 0.00951    | 1.00                                | 0.11 | 2.11E-02 | 0.37        | 0.04 | 6.85E-02 | 0.21         | 0.10 | 5.37E-01 | 0.72     | 0.12 | 6.39E-02 | 0.71 | 0.14     | 3.01E-02 | 2.08 | 0.31 | 2.41E-04     | 0.35 | 0.10 | 2.40E-01     | 0.31 | 0.03 | 2.18E-01    |  |  |
| TRIM46  | No            | Yes            | Yes                                    | Up                        | 1.65                             | 0.002182            | 1.5E-19    | 0.56                                | 0.10 | 1.51E-01 | 0.76        | 0.04 | 1.63E-03 | 0.57         | 0.11 | 1.44E-01 | 0.49     | 0.12 | 1.07E-01 | 0.89 | 0.15     | 1.26E-01 | 1.24 | 0.24 | 9.52E-02     | 0.94 | 0.10 | 1.55E-02     | 0.31 | 0.03 | 5.23E-02    |  |  |
| SYNGR3  | No            | Yes            | No                                     | Up                        | 1.65                             | 1.66E-05            | 1.5E-19    | 0.78                                | 0.11 | 2.09E-02 | 0.70        | 0.04 | 1.59E-03 | 0.77         | 0.11 | 8.09E-03 | 0.40     | 0.12 | 2.82E-01 | 0.94 | 0.15     | 3.23E-01 | 0.52 | 0.21 | 6.22E-01     | 1.09 | 0.10 | 3.22E-04     | 0.57 | 0.03 | 4.73E-04    |  |  |
| JRK     | No            | No             | No                                     | Up                        | 1.65                             | 0.024274            | 0.01055    | 0.77                                | 0.11 | 1.07E-01 | 0.47        | 0.04 | 5.48E-02 | 1.28         | 0.12 | 9.35E-03 | 0.42     | 0.12 | 2.45E-01 | 0.97 | 0.15     | 3.85E-01 | 0.95 | 0.22 | 3.58E-01     | 0.57 | 0.10 | 1.80E-01     | 0.35 | 0.03 | 4.21E-02    |  |  |
| CD7C    | No            | Yes            | No                                     | Up                        | 1.65                             | 3.58E-06            | 0.00018    | 0.41                                | 0.10 | 1.48E-01 | 1.03        | 0.04 | 5.68E-06 | 0.56         | 0.11 | 3.83E-02 | 0.69     | 0.12 | 4.86E-02 | 0.64 | 0.14     | 1.64E-01 | 0.50 | 0.21 | 3.08E-01     | 1.15 | 0.10 | 2.14E-04     | 0.80 | 0.03 | 7.75E-04    |  |  |
| SLC38A1 | No            | Yes            | No                                     | Up                        | 1.65                             | 1.83E-19            | 1.5E-19    | 1.39                                | 0.12 | 3.61E-05 | 0.84        | 0.04 | 2.29E-05 | 1.01         | 0.11 | 9.16E-04 | 0.67     | 0.12 | 3.76E-02 | 0.67 | 0.14     | 2.26E-02 | 0.59 | 0.21 | 5.95E-02     | 0.47 | 0.10 | 5.27E-02     | 0.12 | 0.03 | 3.89E-01    |  |  |
| CDCA5   | No            | Yes            | No                                     | Up                        | 1.65                             | 1.83E-19            | 6.7E-06    | 1.01                                | 0.11 | 1.89E-03 | 0.83        | 0.04 | 3.16E-05 | 0.73         | 0.11 | 1.57E-02 | 0.70     | 0.12 | 3.39E-02 | 0.38 | 0.14     | 1.22E-01 | 0.94 | 0.22 | 1.04E-02     | 0.59 | 0.10 | 5.23E-02     | 0.60 | 0.03 | 1.32E-03    |  |  |
| WDR70   | No            | No             | No                                     | Up                        | 1.65                             | 0.001737            | 0.00472    | 1.00                                | 0.11 | 3.39E-02 | 0.87        | 0.04 | 1.05E-03 | 0.60         | 0.11 | 1.58E-01 | 0.36     | 0.11 | 5.43E-01 | 0.88 | 0.15     | 2.04E-02 | 1.14 | 0.23 | 1.31E-02     | 0.49 | 0.10 | 1.49E-01     | 0.43 | 0.03 | 1.81E-01    |  |  |
| ADNP    | No            | Yes            | No                                     | Up                        | 1.65                             | 0.000781            | 0.00212    | 0.87</                              |      |          |             |      |          |              |      |          |          |      |          |      |          |          |      |      |              |      |      |              |      |      |             |  |  |

**Supplementary Table 2. Details for 2,053 genes differentially expressed between EEC and NEEC, identified by microarray meta-analysis.**  
 EEC - endometrioid endometrial cancer, NEEC - non-endometrioid endometrial cancer, SMD - Standardised Mean Difference, FDR - False Discovery Rate, Var - Variance

| Gene     | 145 gene list | 1253 gene list | Associated with EEC-specific survival? | Up/Down Regulated in NEEC | average standardised fold change | Microarray Meta FDR | RNAseq FDR | Individual microarray study results |      |          |             |      |          |              |      |          |          |      |          |          |      |          |              |      |          |              |      |          |             |      |          |
|----------|---------------|----------------|----------------------------------------|---------------------------|----------------------------------|---------------------|------------|-------------------------------------|------|----------|-------------|------|----------|--------------|------|----------|----------|------|----------|----------|------|----------|--------------|------|----------|--------------|------|----------|-------------|------|----------|
|          |               |                |                                        |                           |                                  |                     |            | TCGA                                |      |          | E-MTAB-2532 |      |          | E-GEOD-56026 |      |          | GSE32507 |      |          | GSE24537 |      |          | E-GEOD-23518 |      |          | E-GEOD-17025 |      |          | E-GEOD-2109 |      |          |
|          |               |                |                                        |                           |                                  |                     |            | SMD                                 | Var  | P-value  | SMD         | Var  | P-value  | SMD          | Var  | P-value  | SMD      | Var  | P-value  | SMD      | Var  | P-value  | SMD          | Var  | P-value  | SMD          | Var  | P-value  | SMD         | Var  | P-value  |
| FAM83D   | No            | Yes            | No                                     | Up                        | 1.67                             | 1.83E-19            | 1.5E-19    | 0.84                                | 0.11 | 2.56E-03 | 0.53        | 0.04 | 1.54E-03 | 0.59         | 0.11 | 1.82E-02 | 1.07     | 0.13 | 7.54E-04 | 0.47     | 0.14 | 1.11E-01 | 0.77         | 0.21 | 4.41E-02 | 0.79         | 0.10 | 2.43E-03 | 0.83        | 0.03 | 3.68E-05 |
| SASH1    | No            | Yes            | No                                     | Up                        | 1.67                             | 6.06E-05            | 3.5E-05    | 1.48                                | 0.12 | 4.63E-04 | 0.14        | 0.04 | 4.09E-01 | 0.67         | 0.11 | 3.92E-02 | 0.97     | 0.13 | 9.46E-03 | 0.89     | 0.15 | 4.99E-03 | 0.30         | 0.20 | 2.85E-01 | 0.83         | 0.10 | 1.07E-02 | 0.61        | 0.03 | 2.14E-02 |
| NDC80    | No            | Yes            | No                                     | Up                        | 1.67                             | 1.83E-19            | 1.5E-19    | 1.11                                | 0.11 | 8.16E-04 | 1.03        | 0.04 | 3.45E-06 | 0.54         | 0.11 | 3.45E-02 | 0.92     | 0.12 | 3.82E-03 | 0.52     | 0.14 | 2.92E-01 | 0.48         | 0.21 | 3.25E-01 | 0.68         | 0.10 | 1.03E-02 | 0.63        | 0.03 | 2.02E-03 |
| TRAM11L  | No            | Yes            | No                                     | Up                        | 1.67                             | 9.46E-05            | 1.5E-19    | 0.81                                | 0.11 | 6.13E-03 | 0.67        | 0.04 | 3.25E-04 | 0.67         | 0.11 | 2.04E-02 | 0.30     | 0.11 | 2.38E-01 | 0.68     | 0.14 | 5.07E-01 | 1.46         | 0.25 | 3.46E-01 | 0.64         | 0.10 | 1.71E-02 | 0.67        | 0.03 | 1.80E-03 |
| DSE      | No            | No             | No                                     | Up                        | 1.67                             | 3.58E-06            | validated  | 0.04                                | 0.10 | 8.82E-01 | 0.75        | 0.04 | 3.81E-04 | 0.49         | 0.10 | 9.05E-02 | 1.45     | 0.14 | 5.53E-04 | 0.88     | 0.15 | 5.74E-03 | 0.83         | 0.22 | 1.83E-02 | 1.19         | 0.10 | 1.74E-04 | 0.28        | 0.03 | 5.54E-02 |
| ZYG11A   | No            | Yes            | No                                     | Up                        | 1.67                             | 3.97E-05            | 1.5E-19    | 0.48                                | 0.10 | 4.48E-02 | 0.74        | 0.04 | 1.47E-04 | 0.64         | 0.11 | 2.26E-02 | 0.36     | 0.11 | 1.58E-01 | 1.43     | 0.17 | 5.45E-01 | 0.68         | 0.21 | 7.67E-01 | 0.99         | 0.10 | 1.88E-03 | 0.58        | 0.03 | 4.92E-04 |
| PLEKH4A  | No            | Yes            | No                                     | Up                        | 1.67                             | 2.40E-05            | 1.5E-05    | 0.60                                | 0.10 | 2.29E-02 | 0.63        | 0.04 | 1.07E-03 | 0.34         | 0.10 | 2.30E-01 | 0.33     | 0.11 | 2.26E-01 | 1.49     | 0.17 | 5.68E-04 | 1.50         | 0.26 | 1.38E-03 | 0.61         | 0.10 | 1.33E-01 | 0.41        | 0.03 | 2.64E-02 |
| EGFL6    | No            | Yes            | No                                     | Up                        | 1.67                             | 1.83E-19            | 1.5E-19    | 1.36                                | 0.12 | 1.00E-05 | 1.06        | 0.04 | 1.36E-06 | 0.64         | 0.11 | 1.39E-02 | 0.53     | 0.12 | 5.09E-02 | 0.57     | 0.14 | 3.13E-02 | 0.80         | 0.22 | 1.74E-02 | 0.28         | 0.10 | 1.92E-01 | 0.68        | 0.03 | 2.93E-04 |
| USP51    | No            | No             | No                                     | Up                        | 1.67                             | 1.14E-05            | 4.3E-05    | 0.93                                | 0.11 | 2.70E-03 | 0.65        | 0.04 | 1.22E-03 | 1.04         | 0.11 | 2.59E-03 | 1.28     | 0.13 | 3.73E-04 | 0.18     | 0.14 | 8.65E-01 | 0.99         | 0.22 | 5.46E-01 | 0.20         | 0.10 | 4.48E-01 | 0.66        | 0.03 | 5.50E-04 |
| GSP72    | No            | No             | No                                     | Up                        | 1.67                             | 1.83E-19            | 0.00097    | 0.67                                | 0.11 | 2.19E-02 | 0.15        | 0.04 | 3.14E-01 | 0.54         | 0.11 | 3.06E-02 | 0.85     | 0.12 | 4.25E-03 | 1.12     | 0.16 | 2.55E-03 | 1.13         | 0.23 | 9.20E-03 | 0.78         | 0.10 | 4.52E-03 | 0.70        | 0.03 | 2.50E-05 |
| MAPRE1   | No            | Yes            | No                                     | Up                        | 1.67                             | 3.97E-05            | 0.00273    | 1.66                                | 0.13 | 3.26E-04 | 0.65        | 0.04 | 3.37E-03 | 0.52         | 0.11 | 1.21E-01 | 0.93     | 0.12 | 3.56E-02 | 0.28     | 0.14 | 1.94E-01 | 0.81         | 0.22 | 1.53E-02 | 0.08         | 0.10 | 7.06E-01 | 1.01        | 0.04 | 9.03E-04 |
| KCNMB3   | No            | No             | No                                     | Up                        | 1.67                             | 0.00022             | 0.0012     | 1.13                                | 0.11 | 8.12E-03 | 1.04        | 0.04 | 1.37E-04 | 0.96         | 0.11 | 3.21E-02 | 0.56     | 0.12 | 9.40E-02 | 0.39     | 0.14 | 4.74E-01 | 0.76         | 0.21 | 1.70E-01 | 0.68         | 0.10 | 4.67E-02 | 0.42        | 0.03 | 2.18E-02 |
| PRR3     | No            | No             | No                                     | Up                        | 1.67                             | 0.001649            | 0.01497    | 0.72                                | 0.11 | 1.37E-01 | 0.44        | 0.04 | 8.69E-02 | 0.77         | 0.11 | 3.32E-02 | 0.56     | 0.12 | 1.55E-01 | 0.76     | 0.15 | 1.70E-01 | 1.28         | 0.24 | 5.52E-02 | 0.74         | 0.10 | 3.59E-02 | 0.66        | 0.03 | 9.71E-04 |
| MN1      | No            | No             | No                                     | Up                        | 1.67                             | 1.14E-05            | validated  | 0.66                                | 0.11 | 5.33E-02 | 0.28        | 0.04 | 2.04E-01 | 0.71         | 0.11 | 7.43E-03 | 0.99     | 0.13 | 2.73E-03 | 1.13     | 0.16 | 2.28E-02 | 1.20         | 0.24 | 2.69E-02 | 0.13         | 0.10 | 6.68E-01 | 0.85        | 0.03 | 7.04E-06 |
| CCDC3    | No            | Yes            | No                                     | Up                        | 1.67                             | 1.83E-19            | 5.1E-05    | 0.49                                | 0.10 | 5.73E-02 | 0.48        | 0.04 | 5.09E-03 | 0.66         | 0.11 | 2.73E-02 | 0.56     | 0.12 | 4.82E-02 | 1.26     | 0.16 | 3.51E-04 | 1.52         | 0.26 | 5.92E-04 | 0.23         | 0.10 | 3.61E-01 | 0.75        | 0.03 | 1.11E-04 |
| GTF2IRD1 | No            | Yes            | No                                     | Up                        | 1.67                             | 6.26E-05            | 0.0003     | 1.24                                | 0.12 | 1.91E-03 | 0.83        | 0.04 | 8.92E-04 | 0.62         | 0.11 | 8.58E-02 | 0.56     | 0.12 | 1.27E-01 | 0.47     | 0.14 | 1.68E-01 | 0.00         | 0.20 | 9.83E-01 | 1.47         | 0.11 | 4.19E-04 | 0.75        | 0.03 | 1.93E-02 |
| ILVB1    | No            | Yes            | No                                     | Up                        | 1.68                             | 2.85E-05            | 2.2E-05    | 1.47                                | 0.12 | 2.86E-04 | 0.98        | 0.04 | 9.11E-05 | 1.06         | 0.11 | 1.26E-02 | 0.64     | 0.12 | 1.38E-01 | 0.49     | 0.14 | 7.66E-02 | 0.95         | 0.22 | 1.21E-02 | 0.21         | 0.10 | 3.75E-01 | 0.17        | 0.03 | 4.04E-01 |
| TPST1    | No            | Yes            | No                                     | Up                        | 1.68                             | 6.46E-05            | 6.7E-06    | 0.78                                | 0.11 | 7.75E-03 | 0.39        | 0.04 | 2.47E-02 | 0.67         | 0.11 | 3.56E-02 | 1.11     | 0.13 | 6.07E-03 | 0.78     | 0.15 | 2.35E-02 | 1.13         | 0.23 | 1.11E-02 | 0.45         | 0.10 | 1.44E-01 | 0.67        | 0.03 | 1.64E-02 |
| TRIO     | No            | Yes            | No                                     | Up                        | 1.68                             | 0.000178            | 0.00164    | 1.13                                | 0.11 | 7.84E-03 | 0.81        | 0.04 | 1.39E-04 | 0.89         | 0.11 | 1.78E-02 | 0.25     | 0.11 | 4.63E-01 | 0.92     | 0.15 | 1.30E-01 | 0.94         | 0.22 | 1.82E-01 | 0.71         | 0.10 | 2.22E-02 | 0.33        | 0.03 | 4.22E-02 |
| ARLGGIP6 | No            | Yes            | No                                     | Up                        | 1.68                             | 3.58E-06            | 0.00015    | 0.56                                | 0.10 | 3.64E-02 | 0.91        | 0.04 | 1.68E-04 | 0.90         | 0.11 | 6.24E-03 | 0.86     | 0.12 | 1.36E-02 | 0.10     | 0.14 | 5.60E-01 | 0.81         | 0.22 | 2.81E-02 | 1.45         | 0.11 | 1.22E-04 | 0.40        | 0.03 | 6.25E-02 |
| SNRPB2   | No            | Yes            | No                                     | Up                        | 1.68                             | 1.14E-05            | 0.00137    | 1.02                                | 0.11 | 2.18E-02 | 0.92        | 0.04 | 3.64E-04 | 0.44         | 0.10 | 1.74E-01 | 0.86     | 0.12 | 3.51E-02 | 1.05     | 0.15 | 9.67E-04 | 1.38         | 0.25 | 3.90E-04 | 0.01         | 0.10 | 9.68E-01 | 0.31        | 0.03 | 6.87E-02 |
| EIF1B    | No            | Yes            | No                                     | Up                        | 1.68                             | 0.00016             | 0.00028    | 0.95                                | 0.11 | 5.07E-03 | 0.62        | 0.04 | 4.48E-03 | 1.04         | 0.11 | 1.29E-02 | 1.48     | 0.14 | 1.89E-03 | 0.03     | 0.14 | 8.54E-01 | 1.24         | 0.24 | 1.43E-02 | 0.46         | 0.10 | 8.24E-02 | 0.18        | 0.03 | 2.47E-01 |
| UVRAG    | No            | Yes            | No                                     | Up                        | 1.68                             | 0.000526            | 4.6E-06    | 2.08                                | 0.14 | 1.29E-05 | 0.50        | 0.04 | 2.63E-02 | 0.16         | 0.10 | 6.57E-01 | 0.67     | 0.12 | 1.11E-01 | 0.59     | 0.14 | 1.75E-01 | 0.93         | 0.22 | 7.46E-02 | 0.69         | 0.10 | 3.17E-02 | 0.89        | 0.03 | 1.39E-01 |
| CDK5RAP1 | No            | No             | Yes                                    | Up                        | 1.68                             | 0.004065            | 0.01025    | 0.95                                | 0.11 | 1.37E-02 | 0.13        | 0.04 | 4.99E-01 | 0.50         | 0.12 | 4.91E-03 | 0.59     | 0.12 | 1.79E-01 | 0.65     | 0.14 | 7.98E-02 | 1.02         | 0.23 | 4.11E-02 | 0.31         | 0.10 | 4.67E-01 | 0.35        | 0.03 | 1.84E-02 |
| MPP6     | No            | Yes            | Yes                                    | Up                        | 1.68                             | 3.58E-06            | 6.7E-06    | 1.22                                | 0.12 | 2.89E-04 | 0.60        | 0.04 | 3.00E-03 | 0.89         | 0.11 | 2.71E-03 | 0.21     | 0.11 | 4.37E-01 | 1.18     | 0.16 | 1.23E-02 | 0.99         | 0.22 | 2.93E-02 | 0.21         | 0.10 | 3.98E-01 | 0.69        | 0.03 | 3.06E-04 |
| CCDC28B  | No            | No             | No                                     | Up                        | 1.68                             | 0.000125            | validated  | 0.61                                | 0.10 | 2.53E-02 | 0.71        | 0.04 | 8.14E-04 | 0.79         | 0.11 | 3.10E-02 | 1.28     | 0.13 | 6.09E-03 | 1.32     | 0.16 | 1.69E-02 | 0.71         | 0.21 | 1.39E-01 | 0.17         | 0.10 | 6.84E-01 | 0.42        | 0.03 | 1.50E-02 |
| RGS9BP   | No            | Yes            | No                                     | Up                        | 1.68                             | 0.000133            | 1.5E-19    | 1.43                                | 0.12 | 1.59E-05 | 0.80        | 0.04 | 9.79E-03 | 0.34         | 0.10 | 3.74E-01 | 0.94     | 0.12 | 2.85E-03 | 0.65     | 0.14 | 6.05E-01 | 0.61         | 0.21 | 6.47E-01 | 0.86         | 0.10 | 9.40E-02 | 0.39        | 0.03 | 1.82E-02 |
| LSM14A   | No            | No             | No                                     | Up                        | 1.68                             | 5.61E-05            | 0.00199    | 1.11                                | 0.11 | 7.81E-03 | 0.77        | 0.04 | 3.10E-03 | 0.56         | 0.11 | 1.55E-01 | 0.03     | 0.11 | 9.49E-01 | 1.09     | 0.15 | 1.05E-03 | 0.87         | 0.22 | 1.08E-02 | 0.88         | 0.10 | 9.89E-03 | 0.71        | 0.03 | 5.07E-02 |
| RBM42    | No            | Yes            | No                                     | Up                        | 1.68                             | 0.000148            | 0.00184    | 1.09                                | 0.11 | 5.38E-03 | 0.58        | 0.04 | 1.40E-02 | 0.30         | 0.10 | 4.23E-01 | 0.93     | 0.12 | 9.55E-02 | 1.17     | 0.16 | 4.72E-04 | 1.09         | 0.23 | 3.39E-03 | 0.16         | 0.10 | 6.43E-01 | 0.69        | 0.03 | 3.73E-02 |
| PRRX2    | No            | Yes            | No                                     | Up                        | 1.68                             | 1.83E-19            | 1.5E-19    | 1.00                                | 0.11 | 4.06E-04 | 0.80        | 0.04 | 1.32E-05 | 0.12         | 0.10 | 6.66E-01 | 0.96     | 0.13 | 7.11E-04 | 1.11     | 0.16 | 3.91E-03 | 0.35         | 0.20 | 2.72E-01 | 0.99         | 0.10 | 2.14E-02 | 0.69        | 0.03 | 1.38E-04 |
| LY6K     | No            | Yes            | No                                     | Up                        | 1.68                             | 1.83E-19            | 1.5E-19    | 0.93                                | 0.11 | 2.45E-03 | 0.60        | 0.04 | 1.47E-04 | 1.09         | 0.11 | 1.58E-04 | 0.55     | 0.12 | 4.84E-02 | 0.68     | 0.14 | 4.09E-01 | 1.29         | 0.24 | 2.12E-01 | 0.08         | 0.10 | 7.24E-01 | 0.79        | 0.03 | 1.57E-05 |
| CKS1B    | No            | Yes            | No                                     | Up                        | 1.69                             | 1.83E-19            | 1.5E-19    | 1.31                                | 0.12 | 4.18E-04 | 0.47        | 0.04 | 6.01E-03 | 0.77         | 0.11 | 1.47E-02 | 1.12     | 0.13 | 2.07E-03 | 0.74     | 0.14 | 7.50E-03 | 0.66         | 0.21 | 3.15E-02 | 0.24         | 0.10 | 2.80E-01 | 0.74        | 0.03 | 1.91E-03 |
| PCDH10   | No            | Yes            | No                                     | Up                        | 1.69                             | 5.41E-05            | 1.5E-19    | 0.40                                | 0.10 | 2.54E-01 | 1.27        | 0.04 | 5.91E-06 | 0.86         | 0.11 | 2.70E-03 | 0.22     | 0.11 | 4.06E-01 | 0.80     | 0.15 | 1.73E-01 | 1.17         | 0.23 | 1.43E-01 | 1.01         | 0.10 | 1.04E-02 | 0.32        | 0.03 | 4.64E-02 |
| DSCAML1  | No            | Yes            | No                                     | Up                        | 1.69                             | 0.000127            | 1.5E-19    | 2.04                                | 0.14 | 4.54E-07 | 0.34        | 0.04 | 7.19E-02 | 0.52         | 0.11 | 2.11E-01 | 0.57     | 0.12 | 3.21E-02 | 0.30     | 0.14 | 7.66E-01 | 1.16         | 0.23 | 3.71E-01 | 0.66         | 0.10 | 1.81E-01 | 0.64        | 0.03 | 8.62E-03 |
| PLCD4    | No            | No             | No                                     | Up                        | 1.69                             | 3.58E-06            | 0.01087    | 1.02                                | 0.11 | 3.37E-03 | 0.76        | 0.04 | 5.67E-04 | 0.09         | 0.10 | 7.69E-01 | 1.21     | 0.13 | 2.03E-04 | 0.66     | 0.14 | 3.24E-01 | 0.57         | 0.21 | 3.74E-01 | 1.11         | 0.10 | 4.22E-03 | 0.64        | 0.03 | 2.65E-04 |
| MEOX1    | No            | Yes            | No                                     | Up                        | 1.69                             | 1.83E-19            | 1.5E-19    | 1.08                                | 0.11 | 1.89E-04 | 0.74        | 0.04 | 7.17E-04 | 0.62         | 0.11 | 2.82E-02 | 0.38     | 0.11 | 1.20E-01 | 0.28     | 0.14 | 2.57E-01 | 1.21         | 0.24 | 9.40E-03 | 0.64         | 0.10 | 2.71E-02 | 1.13        | 0.04 | 1.00E-20 |
| KIAA1586 | No            | No             | No                                     | Up                        | 1.69                             | 0.003095            | validated  | 0.43                                | 0.10 | 2.08E-01 | 0.39        | 0.04 | 1.18E-01 | 0.62         | 0.11 | 4.62E-02 | 1.39     | 0.14 | 4.24E-04 | 0.37     | 0.14 | 7.39E-01 | 1.81         | 0.28 | 4.26E-01 | 0.33         | 0.10 | 2.71E-01 | 0.73        | 0.03 | 2.18E-03 |
| GRASP    | No            | No             | No                                     | Up                        | 1.69                             | 9.46E-05            | 0.0089     |                                     |      |          |             |      |          |              |      |          |          |      |          |          |      |          |              |      |          |              |      |          |             |      |          |

**Supplementary Table 2. Details for 2,053 genes differentially expressed between EEC and NEEC, identified by microarray meta-analysis.**  
 EEC - endometrioid endometrial cancer, NEEC - non-endometrioid endometrial cancer, SMD - Standardised Mean Difference, FDR - False Discovery Rate, Var - Variance

| Gene     | 145 gene list | 1253 gene list | Associated with EEC-specific survival? | Up/Down Regulated in NEEC | average standardised fold change | Microarray Meta FDR | RNAseq FDR | Individual microarray study results |      |          |             |      |          |              |      |          |          |      |          |          |      |          |              |      |          |              |      |          |             |      |          |
|----------|---------------|----------------|----------------------------------------|---------------------------|----------------------------------|---------------------|------------|-------------------------------------|------|----------|-------------|------|----------|--------------|------|----------|----------|------|----------|----------|------|----------|--------------|------|----------|--------------|------|----------|-------------|------|----------|
|          |               |                |                                        |                           |                                  |                     |            | TCGA                                |      |          | E-MTAB-2532 |      |          | E-GEOD-56026 |      |          | GSE32507 |      |          | GSE24537 |      |          | E-GEOD-23518 |      |          | E-GEOD-17025 |      |          | E-GEOD-2109 |      |          |
|          |               |                |                                        |                           |                                  |                     |            | SMD                                 | Var  | P-value  | SMD         | Var  | P-value  | SMD          | Var  | P-value  | SMD      | Var  | P-value  | SMD      | Var  | P-value  | SMD          | Var  | P-value  | SMD          | Var  | P-value  | SMD         | Var  | P-value  |
| ARL10    | No            | No             | No                                     | Up                        | 1.71                             | 0.000108            | 0.00174    | 0.02                                | 0.10 | 9.58E-01 | 0.25        | 0.04 | 3.77E-01 | 1.36         | 0.12 | 2.36E-04 | 1.26     | 0.13 | 5.54E-04 | 1.10     | 0.15 | 4.38E-01 | 1.11         | 0.23 | 4.35E-01 | 0.36         | 0.10 | 1.58E-01 | 0.76        | 0.03 | 4.91E-05 |
| LAT52    | No            | Yes            | No                                     | Up                        | 1.71                             | 6.71E-06            | 0.00023    | 1.34                                | 0.12 | 6.94E-04 | 0.56        | 0.04 | 7.57E-03 | 0.95         | 0.11 | 4.39E-03 | 0.54     | 0.12 | 1.32E-01 | 0.68     | 0.14 | 1.07E-01 | 0.14         | 0.20 | 5.96E-01 | 1.65         | 0.11 | 2.59E-05 | 0.37        | 0.03 | 3.68E-02 |
| SEMA6C   | No            | Yes            | No                                     | Up                        | 1.72                             | 1.14E-05            | 1.9E-05    | 0.68                                | 0.11 | 1.14E-02 | 0.77        | 0.04 | 1.55E-04 | 0.23         | 0.10 | 5.76E-01 | 0.81     | 0.12 | 1.64E-02 | 1.55     | 0.17 | 1.53E-02 | 0.76         | 0.21 | 5.37E-02 | 0.88         | 0.10 | 4.45E-02 | 0.55        | 0.03 | 2.73E-03 |
| ITGA7    | No            | Yes            | No                                     | Up                        | 1.72                             | 1.83E-19            | 1.5E-19    | 1.80                                | 0.13 | 2.50E-06 | 0.85        | 0.04 | 2.23E-05 | 0.36         | 0.10 | 1.95E-01 | 0.83     | 0.12 | 8.62E-03 | 1.04     | 0.15 | 2.92E-01 | 0.41         | 0.20 | 6.30E-01 | 0.12         | 0.10 | 6.51E-01 | 0.82        | 0.03 | 6.36E-06 |
| SLC43A3  | No            | Yes            | No                                     | Up                        | 1.72                             | 3.58E-06            | 1.5E-19    | 0.98                                | 0.11 | 9.77E-04 | 0.44        | 0.04 | 1.17E-02 | 0.66         | 0.11 | 1.68E-02 | 0.69     | 0.12 | 1.95E-02 | 1.44     | 0.17 | 2.45E-03 | 0.75         | 0.21 | 7.45E-02 | 0.57         | 0.10 | 6.49E-02 | 0.71        | 0.03 | 1.33E-03 |
| EGFLAM   | No            | No             | No                                     | Up                        | 1.72                             | 1.83E-19            | validated  | 1.13                                | 0.11 | 1.26E-03 | 0.83        | 0.04 | 3.11E-05 | 0.06         | 0.10 | 8.55E-01 | 1.25     | 0.13 | 1.42E-04 | 0.92     | 0.15 | 2.45E-03 | 0.69         | 0.21 | 3.04E-02 | 0.38         | 0.10 | 2.08E-01 | 0.99        | 0.03 | 2.04E-06 |
| PTPN13   | No            | Yes            | No                                     | Up                        | 1.72                             | 3.58E-06            | 1.5E-19    | 1.06                                | 0.11 | 1.16E-04 | 0.43        | 0.04 | 1.09E-02 | 0.72         | 0.11 | 6.96E-03 | 0.52     | 0.12 | 6.71E-02 | 0.89     | 0.15 | 4.65E-02 | 1.22         | 0.24 | 5.05E-02 | 0.85         | 0.10 | 3.12E-03 | 0.55        | 0.03 | 6.16E-03 |
| SLC29A1  | No            | No             | No                                     | Up                        | 1.72                             | 0.000167            | validated  | 0.81                                | 0.11 | 3.09E-02 | 0.38        | 0.04 | 5.16E-02 | 0.18         | 0.10 | 5.50E-01 | 0.47     | 0.12 | 1.93E-01 | 1.65     | 0.18 | 2.55E-04 | 1.29         | 0.24 | 5.20E-03 | 1.14         | 0.10 | 5.92E-03 | 0.33        | 0.03 | 1.17E-01 |
| IFIT1    | No            | Yes            | No                                     | Up                        | 1.72                             | 1.83E-19            | 1.5E-19    | 1.22                                | 0.12 | 1.73E-05 | 0.91        | 0.04 | 2.27E-06 | 1.10         | 0.11 | 1.00E-04 | 0.40     | 0.12 | 1.17E-01 | 0.99     | 0.15 | 1.06E-03 | 0.49         | 0.21 | 8.60E-02 | 0.51         | 0.10 | 2.47E-02 | 0.62        | 0.03 | 3.14E-04 |
| FAM64A   | No            | No             | No                                     | Up                        | 1.72                             | 1.83E-19            | 0.00103    | 0.34                                | 0.10 | 2.22E-01 | 0.78        | 0.04 | 4.84E-05 | 0.73         | 0.11 | 2.07E-02 | 1.10     | 0.13 | 2.22E-03 | 0.62     | 0.14 | 6.67E-02 | 1.06         | 0.23 | 1.90E-02 | 0.87         | 0.10 | 9.47E-03 | 0.73        | 0.03 | 8.59E-04 |
| CRYAB    | No            | Yes            | No                                     | Up                        | 1.72                             | 1.83E-19            | 1.5E-19    | 1.47                                | 0.12 | 7.04E-06 | 0.55        | 0.04 | 1.01E-03 | 0.79         | 0.11 | 2.48E-03 | 0.49     | 0.12 | 5.55E-02 | 1.30     | 0.16 | 1.13E-04 | 0.60         | 0.21 | 4.51E-02 | 0.36         | 0.10 | 2.34E-01 | 0.69        | 0.03 | 1.38E-04 |
| MSH6     | No            | Yes            | No                                     | Up                        | 1.72                             | 1.14E-05            | 0.00055    | 0.83                                | 0.11 | 1.64E-02 | 0.91        | 0.04 | 3.10E-04 | 0.74         | 0.11 | 1.28E-02 | 1.37     | 0.14 | 5.42E-03 | 1.13     | 0.16 | 1.12E-03 | 0.73         | 0.21 | 3.06E-02 | 0.48         | 0.10 | 7.00E-02 | 0.68        | 0.03 | 5.79E-01 |
| PLAGL1   | No            | Yes            | No                                     | Up                        | 1.72                             | 1.83E-19            | 1.5E-19    | 0.91                                | 0.11 | 1.05E-02 | 0.77        | 0.04 | 6.84E-05 | 0.33         | 0.10 | 1.68E-01 | 1.00     | 0.13 | 1.38E-03 | 0.93     | 0.15 | 5.85E-02 | 0.80         | 0.22 | 5.42E-02 | 1.13         | 0.10 | 9.79E-05 | 0.39        | 0.03 | 3.12E-02 |
| CCNE1    | No            | Yes            | No                                     | Up                        | 1.72                             | 1.83E-19            | 1.5E-19    | 1.66                                | 0.13 | 6.82E-07 | 0.93        | 0.04 | 2.73E-06 | 0.83         | 0.11 | 2.39E-03 | 0.60     | 0.12 | 6.34E-02 | 0.56     | 0.14 | 3.25E-02 | 0.48         | 0.21 | 1.04E-01 | 0.86         | 0.10 | 1.47E-03 | 0.35        | 0.03 | 3.75E-02 |
| BCAS4    | No            | No             | No                                     | Up                        | 1.72                             | 2.40E-05            | validated  | 1.63                                | 0.13 | 2.29E-04 | 0.33        | 0.04 | 4.89E-02 | 0.62         | 0.11 | 6.52E-02 | 0.98     | 0.13 | 3.30E-03 | 0.90     | 0.15 | 1.35E-02 | 0.88         | 0.22 | 2.09E-02 | 0.58         | 0.10 | 1.55E-01 | 0.35        | 0.03 | 3.02E-02 |
| COL23A1  | No            | Yes            | No                                     | Up                        | 1.72                             | 1.83E-19            | 1.5E-19    | 0.86                                | 0.11 | 1.09E-03 | 0.89        | 0.04 | 2.73E-06 | 0.35         | 0.10 | 1.60E-01 | 0.65     | 0.12 | 1.52E-02 | 0.90     | 0.15 | 2.09E-02 | 0.77         | 0.21 | 5.47E-02 | 0.84         | 0.10 | 1.03E-02 | 1.03        | 0.04 | 6.82E-07 |
| FAM43A   | No            | No             | No                                     | Up                        | 1.72                             | 1.83E-19            | 0.04       | 0.64                                | 0.11 | 4.49E-02 | 0.93        | 0.04 | 1.23E-04 | 0.99         | 0.11 | 1.51E-03 | 1.59     | 0.15 | 5.02E-05 | 0.61     | 0.14 | 3.64E-02 | 0.02         | 0.20 | 8.76E-01 | 0.87         | 0.10 | 3.74E-03 | 0.64        | 0.03 | 3.33E-04 |
| GABBR1   | No            | Yes            | No                                     | Up                        | 1.72                             | 1.14E-05            | 2.3E-06    | 0.74                                | 0.11 | 7.63E-02 | 0.72        | 0.04 | 3.77E-04 | 1.12         | 0.11 | 1.53E-03 | 0.40     | 0.12 | 1.75E-01 | 1.24     | 0.16 | 8.74E-03 | 1.05         | 0.23 | 3.46E-02 | 0.27         | 0.10 | 2.88E-01 | 0.75        | 0.03 | 5.24E-04 |
| SNAP25   | No            | Yes            | No                                     | Up                        | 1.73                             | 1.83E-19            | 1.5E-19    | 0.74                                | 0.11 | 1.34E-02 | 0.97        | 0.04 | 1.68E-04 | 0.80         | 0.11 | 4.31E-03 | 0.87     | 0.12 | 7.75E-03 | 0.41     | 0.14 | 1.31E-01 | 0.57         | 0.21 | 9.87E-02 | 1.21         | 0.10 | 4.48E-04 | 0.79        | 0.03 | 5.45E-06 |
| ABCA3    | No            | Yes            | No                                     | Up                        | 1.73                             | 1.83E-19            | 1.5E-19    | 1.17                                | 0.11 | 1.12E-04 | 1.18        | 0.04 | 1.00E-20 | 0.65         | 0.11 | 4.69E-02 | 0.81     | 0.12 | 2.32E-03 | 0.81     | 0.15 | 8.67E-02 | 1.01         | 0.20 | 6.99E-01 | 1.01         | 0.10 | 7.90E-03 | 0.51        | 0.03 | 6.14E-03 |
| CPNE1    | No            | Yes            | No                                     | Up                        | 1.73                             | 1.41E-05            | 0.00013    | 1.06                                | 0.11 | 3.83E-03 | 0.60        | 0.04 | 2.85E-03 | 0.86         | 0.11 | 1.99E-02 | 0.85     | 0.12 | 3.21E-02 | 0.80     | 0.15 | 1.01E-02 | 0.65         | 0.21 | 3.99E-02 | 1.17         | 0.10 | 4.48E-03 | 0.31        | 0.03 | 1.71E-01 |
| SALL2    | No            | Yes            | No                                     | Up                        | 1.73                             | 1.14E-05            | 0.00038    | 0.30                                | 0.10 | 2.03E-01 | 0.49        | 0.04 | 4.45E-03 | 0.81         | 0.11 | 1.23E-02 | 0.83     | 0.12 | 1.82E-02 | 0.93     | 0.15 | 1.05E-02 | 1.13         | 0.31 | 1.04E-04 | 0.17         | 0.10 | 4.98E-01 | 0.65        | 0.03 | 3.72E-03 |
| GFOD1    | No            | Yes            | No                                     | Up                        | 1.73                             | 1.83E-19            | 1.5E-19    | 0.61                                | 0.10 | 1.85E-02 | 1.19        | 0.04 | 4.54E-07 | 1.21         | 0.11 | 4.83E-04 | 0.53     | 0.12 | 7.73E-02 | 1.00     | 0.15 | 5.11E-03 | 0.62         | 0.21 | 9.62E-02 | 0.38         | 0.10 | 1.64E-01 | 0.76        | 0.03 | 3.67E-03 |
| FAM133A  | No            | Yes            | No                                     | Up                        | 1.73                             | 1.83E-19            | 1.5E-19    | 1.55                                | 0.12 | 5.00E-06 | 0.74        | 0.04 | 2.17E-04 | 0.47         | 0.10 | 9.25E-02 | 0.79     | 0.12 | 3.01E-03 | 1.59     | 0.14 | 1.50E-01 | 0.62         | 0.21 | 1.51E-01 | 0.96         | 0.10 | 6.54E-03 | 0.59        | 0.03 | 4.03E-04 |
| REEP2    | No            | No             | No                                     | Up                        | 1.73                             | 1.83E-19            | 0.00178    | 0.92                                | 0.11 | 1.91E-03 | 0.99        | 0.04 | 1.59E-06 | 0.36         | 0.10 | 4.05E-01 | 1.35     | 0.14 | 2.05E-04 | 0.51     | 0.14 | 5.59E-01 | 0.46         | 0.21 | 6.70E-01 | 1.04         | 0.10 | 8.04E-02 | 0.69        | 0.03 | 4.27E-04 |
| CLCN4    | No            | Yes            | No                                     | Up                        | 1.73                             | 1.66E-05            | 1.5E-19    | 1.17                                | 0.11 | 3.78E-04 | 0.77        | 0.04 | 9.39E-03 | 0.66         | 0.11 | 1.63E-02 | 1.08     | 0.13 | 2.00E-03 | 0.90     | 0.15 | 5.25E-01 | 0.87         | 0.22 | 4.83E-01 | 0.33         | 0.10 | 1.70E-01 | 0.55        | 0.03 | 4.83E-04 |
| CDCN3    | No            | Yes            | No                                     | Up                        | 1.73                             | 2.40E-05            | 0.00125    | 1.02                                | 0.11 | 2.97E-02 | 0.65        | 0.04 | 3.23E-03 | 0.91         | 0.11 | 2.04E-02 | 1.45     | 0.14 | 8.93E-04 | 0.58     | 0.14 | 3.00E-02 | 0.41         | 0.20 | 1.41E-01 | 1.06         | 0.10 | 4.61E-03 | 0.24        | 0.03 | 1.23E-01 |
| KCTD15   | No            | No             | No                                     | Up                        | 1.73                             | 1.14E-05            | 0.00311    | 0.25                                | 0.10 | 3.60E-01 | 0.36        | 0.04 | 3.36E-02 | 0.74         | 0.11 | 5.08E-03 | 1.57     | 0.15 | 8.63E-06 | 0.76     | 0.15 | 9.19E-02 | 1.83         | 0.28 | 1.13E-02 | 0.64         | 0.10 | 1.20E-02 | 0.17        | 0.03 | 2.40E-01 |
| TP53BP2  | No            | Yes            | No                                     | Up                        | 1.73                             | 2.85E-05            | 0.00511    | 1.00                                | 0.11 | 3.82E-03 | 0.54        | 0.04 | 1.09E-02 | 0.91         | 0.11 | 1.85E-02 | 0.60     | 0.12 | 1.45E-01 | 1.40     | 0.17 | 7.35E-04 | 0.96         | 0.22 | 1.44E-02 | 0.09         | 0.10 | 7.10E-01 | 0.84        | 0.03 | 6.63E-03 |
| KIAA1429 | No            | No             | No                                     | Up                        | 1.73                             | 0.000269            | 0.04544    | 1.42                                | 0.12 | 1.54E-03 | 0.10        | 0.04 | 6.19E-01 | 0.54         | 0.11 | 1.36E-01 | 1.62     | 0.15 | 1.38E-03 | 0.74     | 0.14 | 3.98E-02 | 0.70         | 0.21 | 7.33E-02 | 0.50         | 0.10 | 1.45E-01 | 0.70        | 0.03 | 5.26E-03 |
| MFAF4    | No            | No             | No                                     | Up                        | 1.73                             | 1.83E-19            | 0.01951    | 1.33                                | 0.12 | 1.66E-05 | 0.49        | 0.04 | 1.15E-03 | 0.68         | 0.11 | 1.58E-02 | 1.05     | 0.13 | 3.44E-04 | 0.85     | 0.15 | 3.01E-03 | 0.99         | 0.22 | 3.93E-03 | 0.06         | 0.10 | 8.41E-01 | 0.89        | 0.03 | 1.00E-20 |
| RIMS3    | No            | Yes            | No                                     | Up                        | 1.73                             | 1.83E-19            | 1.5E-19    | 0.59                                | 0.10 | 4.32E-02 | 0.97        | 0.04 | 1.20E-05 | 1.05         | 0.11 | 2.56E-03 | 0.92     | 0.12 | 1.39E-03 | 1.04     | 0.15 | 2.08E-02 | 0.43         | 0.20 | 2.53E-01 | 0.74         | 0.10 | 3.13E-02 | 0.60        | 0.03 | 1.65E-03 |
| ATP6V1G2 | No            | No             | No                                     | Up                        | 1.73                             | 0.000103            | 1.5E-19    | 1.15                                | 0.11 | 4.93E-03 | 0.83        | 0.04 | 3.35E-04 | 1.00         | 0.10 | 3.58E-01 | 1.33     | 0.14 | 1.27E-03 | 0.71     | 0.14 | 2.06E-01 | 0.95         | 0.22 | 1.96E-01 | 0.33         | 0.10 | 4.46E-01 | 0.65        | 0.03 | 4.74E-03 |
| RNPS1    | No            | Yes            | No                                     | Up                        | 1.74                             | 3.97E-05            | 0.04521    | 0.71                                | 0.11 | 9.94E-02 | 0.63        | 0.04 | 3.70E-03 | 0.91         | 0.11 | 7.05E-02 | 0.26     | 0.11 | 3.97E-01 | 1.27     | 0.16 | 2.59E-04 | 1.42         | 0.25 | 5.29E-04 | 0.98         | 0.10 | 1.46E-02 | 0.17        | 0.03 | 4.50E-01 |
| AP3B2    | No            | Yes            | No                                     | Up                        | 1.74                             | 1.14E-05            | 1.5E-19    | 1.06                                | 0.11 | 2.75E-03 | 1.25        | 0.04 | 7.50E-06 | 0.60         | 0.11 | 1.72E-01 | 1.00     | 0.13 | 1.31E-03 | 0.22     | 0.14 | 6.29E-01 | 1.25         | 0.24 | 1.12E-01 | 0.56         | 0.10 | 2.77E-01 | 0.42        | 0.03 | 7.36E-03 |
| ZFH4     | No            | No             | No                                     | Up                        | 1.74                             | 1.83E-19            | 0.00012    | 0.48                                | 0.10 | 4.59E-02 | 1.38        | 0.04 | 1.00E-20 | 0.56         | 0.11 | 6.67E-02 | 1.70     | 0.15 | 2.27E-07 | 0.80     | 0.15 | 3.47E-02 | 0.76         | 0.21 | 5.85E-02 | 0.38         | 0.10 | 4.37E-01 | 0.30        | 0.03 | 4.84E-02 |
| SLC4A3   | No            | Yes            | No                                     | Up                        | 1.74                             | 1.14E-05            | 0.0249     | 0.82                                | 0.11 | 2.92E-03 | 0.69        | 0.04 | 1.53E-04 | 1.01         | 0.11 | 9.59E-03 | 0.31     | 0.11 | 2.27E-01 | 0.88     | 0.15 | 1.30E-01 | 1.36         | 0.25 | 1.89E-01 | 0.93         | 0.10 | 3.80E-03 | 0.38        | 0.03 | 1.79E-02 |
| DZIP1    | No            | No             | No                                     | Up                        | 1.74                             | 1.83E-              |            |                                     |      |          |             |      |          |              |      |          |          |      |          |          |      |          |              |      |          |              |      |          |             |      |          |

**Supplementary Table 2. Details for 2,053 genes differentially expressed between EEC and NEEC, identified by microarray meta-analysis.**  
 EEC - endometrioid endometrial cancer, NEEC - non-endometrioid endometrial cancer, SMD - Standardised Mean Difference, FDR - False Discovery Rate, Var - Variance

| Gene      | 145 gene list | 1253 gene list | Associated with EEC-specific survival? | Up/Down Regulated in NEEC | average standardised fold change | Microarray Meta FDR | RNAseq FDR | Individual microarray study results |      |          |             |      |          |              |      |          |          |      |          |          |      |          |              |      |          |              |      |          |             |      |          |
|-----------|---------------|----------------|----------------------------------------|---------------------------|----------------------------------|---------------------|------------|-------------------------------------|------|----------|-------------|------|----------|--------------|------|----------|----------|------|----------|----------|------|----------|--------------|------|----------|--------------|------|----------|-------------|------|----------|
|           |               |                |                                        |                           |                                  |                     |            | TCGA                                |      |          | E-MTAB-2532 |      |          | E-GEOD-56026 |      |          | GSE32507 |      |          | GSE24537 |      |          | E-GEOD-23518 |      |          | E-GEOD-17025 |      |          | E-GEOD-2109 |      |          |
|           |               |                |                                        |                           |                                  |                     |            | SMD                                 | Var  | P-value  | SMD         | Var  | P-value  | SMD          | Var  | P-value  | SMD      | Var  | P-value  | SMD      | Var  | P-value  | SMD          | Var  | P-value  | SMD          | Var  | P-value  | SMD         | Var  | P-value  |
| RAE1      | No            | Yes            | No                                     | Up                        | 1.76                             | 1.14E-05            | 4.6E-06    | 1.41                                | 0.12 | 2.30E-03 | 0.73        | 0.04 | 1.96E-03 | 1.19         | 0.11 | 1.64E-03 | 0.65     | 0.12 | 8.26E-02 | 0.29     | 0.14 | 1.88E-01 | 1.82         | 0.28 | 1.05E-04 | 0.11         | 0.10 | 6.71E-01 | 0.33        | 0.03 | 5.05E-02 |
| TRAM2     | No            | Yes            | No                                     | Up                        | 1.76                             | 6.46E-05            | 0.00036    | 1.23                                | 0.12 | 1.41E-02 | 0.68        | 0.04 | 2.80E-03 | 1.02         | 0.11 | 6.02E-03 | 0.45     | 0.12 | 1.79E-01 | 0.96     | 0.15 | 2.97E-02 | 1.36         | 0.25 | 2.21E-02 | 0.28         | 0.10 | 3.28E-01 | 0.56        | 0.03 | 2.77E-03 |
| CSNK2A1   | No            | Yes            | No                                     | Up                        | 1.76                             | 8.51E-05            | 0.00024    | 1.95                                | 0.14 | 6.26E-04 | 0.85        | 0.04 | 1.05E-03 | 0.99         | 0.11 | 7.20E-03 | 0.80     | 0.12 | 1.07E-01 | 0.31     | 0.14 | 2.42E-01 | 1.00         | 0.22 | 9.74E-03 | 0.51         | 0.10 | 7.14E-02 | 0.12        | 0.03 | 4.57E-01 |
| GLDC      | No            | Yes            | No                                     | Up                        | 1.76                             | 1.83E-19            | 1.5E-19    | 1.24                                | 0.12 | 3.68E-05 | 0.63        | 0.04 | 5.95E-05 | 0.97         | 0.11 | 3.66E-04 | 0.09     | 0.11 | 7.05E-01 | 1.26     | 0.16 | 2.54E-04 | 0.45         | 0.21 | 1.07E-01 | 1.43         | 0.11 | 4.77E-06 | 0.47        | 0.03 | 2.40E-03 |
| TRIB3     | No            | Yes            | No                                     | Up                        | 1.76                             | 1.83E-19            | 8.5E-05    | 0.60                                | 0.10 | 2.45E-02 | 1.02        | 0.04 | 1.36E-06 | 1.17         | 0.11 | 5.09E-04 | 0.70     | 0.12 | 1.99E-02 | 0.94     | 0.15 | 7.17E-03 | 1.28         | 0.24 | 6.39E-03 | 0.53         | 0.10 | 5.61E-02 | 0.29        | 0.03 | 4.94E-02 |
| BHMT2     | No            | No             | No                                     | Up                        | 1.76                             | 3.58E-06            | 0.00024    | 1.66                                | 0.13 | 6.82E-07 | 0.51        | 0.04 | 4.35E-03 | 0.70         | 0.11 | 1.54E-02 | 0.15     | 0.11 | 5.10E-01 | 1.51     | 0.17 | 7.27E-02 | 0.68         | 0.21 | 3.43E-01 | 1.04         | 0.10 | 1.53E-03 | 0.30        | 0.03 | 5.09E-02 |
| PLXNA1    | No            | Yes            | No                                     | Up                        | 1.76                             | 6.71E-06            | 0.00155    | 0.92                                | 0.11 | 1.81E-02 | 1.00        | 0.04 | 4.13E-05 | 0.95         | 0.11 | 7.85E-03 | 1.22     | 0.13 | 6.89E-03 | 0.46     | 0.14 | 1.35E-01 | 0.78         | 0.22 | 7.87E-02 | 0.89         | 0.10 | 7.82E-03 | 0.33        | 0.03 | 4.70E-02 |
| MYRBA8    | No            | Yes            | No                                     | Up                        | 1.77                             | 1.83E-19            | 0.00148    | 1.26                                | 0.12 | 1.45E-04 | 0.56        | 0.04 | 8.93E-04 | 0.64         | 0.11 | 3.12E-02 | 1.36     | 0.14 | 1.48E-04 | 0.28     | 0.14 | 3.72E-01 | 1.41         | 0.25 | 9.59E-03 | 0.55         | 0.10 | 5.62E-02 | 0.51        | 0.03 | 3.49E-03 |
| MED30     | No            | Yes            | No                                     | Up                        | 1.77                             | 6.71E-06            | 0.00016    | 1.06                                | 0.11 | 3.22E-03 | 0.47        | 0.04 | 2.99E-02 | 1.32         | 0.12 | 4.06E-04 | 1.48     | 0.14 | 7.28E-04 | 0.42     | 0.14 | 1.09E-01 | 1.37         | 0.25 | 1.20E-03 | 0.23         | 0.10 | 3.31E-01 | 0.22        | 0.03 | 1.68E-01 |
| FLAGL2    | No            | Yes            | No                                     | Up                        | 1.77                             | 1.83E-19            | 1.5E-19    | 1.48                                | 0.12 | 2.79E-05 | 0.85        | 0.04 | 2.77E-04 | 0.92         | 0.11 | 7.61E-03 | 0.30     | 0.11 | 4.23E-01 | 0.63     | 0.14 | 5.07E-02 | 1.13         | 0.23 | 4.03E-03 | 0.46         | 0.10 | 1.17E-01 | 0.80        | 0.03 | 1.60E-03 |
| TKTL1     | No            | Yes            | Yes                                    | Up                        | 1.77                             | 1.83E-19            | 1.5E-19    | 0.98                                | 0.11 | 1.13E-03 | 0.71        | 0.04 | 1.17E-04 | 0.56         | 0.11 | 2.95E-02 | 0.43     | 0.12 | 1.88E-01 | 0.94     | 0.15 | 2.82E-02 | 0.74         | 0.21 | 1.46E-01 | 1.51         | 0.11 | 6.00E-05 | 0.72        | 0.03 | 4.16E-05 |
| EMILIN3   | No            | No             | No                                     | Up                        | 1.77                             | 0.000634            | validated  | 0.28                                | 0.10 | 5.20E-01 | 0.77        | 0.04 | 6.81E-04 | 1.00         | 0.11 | 1.08E-02 | 1.02     | 0.13 | 8.36E-03 | 0.82     | 0.15 | 2.28E-01 | 1.55         | 0.26 | 1.41E-01 | 0.78         | 0.10 | 3.49E-02 | 0.35        | 0.03 | 6.20E-02 |
| ADAMT53   | No            | No             | No                                     | Up                        | 1.77                             | 1.83E-19            | validated  | 1.03                                | 0.11 | 4.80E-03 | 0.92        | 0.04 | 4.11E-05 | 0.81         | 0.11 | 5.91E-03 | 0.77     | 0.12 | 6.69E-03 | 0.15     | 0.14 | 8.88E-01 | 0.72         | 0.21 | 5.86E-01 | 1.22         | 0.10 | 1.03E-03 | 0.97        | 0.03 | 1.27E-05 |
| LG12      | No            | Yes            | No                                     | Up                        | 1.77                             | 1.83E-19            | 1.5E-19    | 1.08                                | 0.11 | 1.20E-04 | 0.41        | 0.04 | 1.78E-02 | 0.50         | 0.10 | 1.59E-01 | 0.80     | 0.12 | 3.76E-03 | 1.08     | 0.15 | 5.94E-02 | 0.89         | 0.22 | 1.64E-01 | 0.84         | 0.10 | 6.21E-02 | 0.99        | 0.03 | 1.14E-06 |
| TSC2D2    | No            | Yes            | No                                     | Up                        | 1.77                             | 4.80E-05            | 0.00015    | 0.81                                | 0.11 | 2.86E-02 | 0.96        | 0.04 | 6.15E-04 | 0.88         | 0.11 | 1.84E-02 | 0.39     | 0.12 | 2.19E-01 | 1.05     | 0.15 | 1.53E-02 | 1.10         | 0.27 | 1.06E-03 | 0.51         | 0.10 | 1.25E-01 | 0.28        | 0.03 | 9.53E-02 |
| RNF26     | No            | Yes            | No                                     | Up                        | 1.77                             | 0.000252            | 0.00124    | 1.36                                | 0.12 | 2.69E-03 | 0.97        | 0.04 | 1.41E-03 | 1.00         | 0.11 | 1.14E-02 | 0.69     | 0.12 | 1.76E-01 | 0.95     | 0.15 | 3.52E-02 | 1.72         | 0.23 | 2.66E-02 | 0.09         | 0.10 | 7.85E-01 | 0.45        | 0.03 | 6.40E-02 |
| CM51      | No            | Yes            | Yes                                    | Up                        | 1.77                             | 9.89E-06            | 0.00046    | 1.06                                | 0.11 | 5.56E-03 | 0.85        | 0.04 | 4.97E-04 | 1.15         | 0.11 | 3.19E-03 | 0.87     | 0.12 | 3.44E-02 | 0.31     | 0.14 | 2.07E-01 | 0.82         | 0.22 | 2.84E-02 | 0.63         | 0.10 | 6.30E-02 | 0.91        | 0.03 | 2.41E-03 |
| C20ORF4   | No            | No             | No                                     | Up                        | 1.77                             | 0.001284            | 0.00585    | 1.35                                | 0.12 | 2.08E-02 | 0.90        | 0.04 | 7.01E-03 | 0.78         | 0.11 | 6.76E-02 | 0.70     | 0.12 | 3.62E-01 | 0.37     | 0.14 | 1.64E-01 | 1.03         | 0.23 | 1.20E-02 | 0.62         | 0.10 | 1.03E-01 | 0.85        | 0.03 | 1.93E-02 |
| C10ORF114 | No            | No             | No                                     | Up                        | 1.77                             | 1.83E-19            | 5.1E-05    | 1.73                                | 0.13 | 4.54E-07 | 1.35        | 0.04 | 1.00E-20 | 0.43         | 0.10 | 3.15E-01 | 0.59     | 0.12 | 2.20E-02 | 0.89     | 0.15 | 1.40E-01 | 1.55         | 0.21 | 4.03E-01 | 0.52         | 0.10 | 2.40E-01 | 0.54        | 0.03 | 5.72E-04 |
| SEMA4F    | No            | No             | No                                     | Up                        | 1.77                             | 0.000402            | validated  | 0.82                                | 0.11 | 1.32E-02 | 0.43        | 0.04 | 4.16E-02 | 1.05         | 0.11 | 5.23E-03 | 0.77     | 0.12 | 3.62E-02 | 1.23     | 0.16 | 2.54E-02 | 1.33         | 0.24 | 2.25E-02 | 0.46         | 0.10 | 1.55E-01 | 0.52        | 0.03 | 4.48E-02 |
| CDKN2C    | No            | No             | No                                     | Up                        | 1.78                             | 1.83E-19            | validated  | 0.48                                | 0.10 | 6.03E-02 | 0.16        | 0.04 | 2.95E-01 | 0.66         | 0.11 | 1.61E-02 | 1.18     | 0.13 | 1.01E-03 | 1.08     | 0.15 | 4.35E-03 | 0.93         | 0.22 | 6.43E-02 | 1.71         | 0.11 | 1.14E-06 | 0.43        | 0.03 | 1.57E-02 |
| ICE1      | No            | Yes            | No                                     | Up                        | 1.78                             | 0.000593            | 0.0003     | 1.13                                | 0.11 | 6.18E-03 | 0.82        | 0.04 | 2.48E-03 | 1.05         | 0.11 | 1.41E-02 | 0.56     | 0.12 | 2.22E-01 | 0.66     | 0.14 | 3.14E-01 | 0.92         | 0.22 | 1.88E-01 | 0.26         | 0.10 | 4.10E-01 | 1.23        | 0.04 | 1.54E-03 |
| GAS1      | No            | No             | No                                     | Up                        | 1.78                             | 1.83E-19            | 0.0125     | 1.35                                | 0.12 | 6.36E-06 | 0.07        | 0.04 | 5.76E-01 | 0.64         | 0.11 | 7.38E-03 | 1.35     | 0.14 | 2.00E-05 | 1.03     | 0.15 | 7.12E-04 | 0.88         | 0.22 | 8.14E-03 | 0.59         | 0.10 | 1.09E-02 | 0.73        | 0.03 | 5.45E-06 |
| CHERP     | No            | Yes            | No                                     | Up                        | 1.78                             | 0.000391            | 0.00053    | 1.46                                | 0.12 | 2.06E-03 | 0.51        | 0.04 | 2.11E-02 | 1.08         | 0.11 | 9.88E-03 | 0.78     | 0.12 | 5.51E-02 | 1.05     | 0.15 | 3.49E-02 | 2.04         | 0.20 | 4.57E-01 | 1.40         | 0.11 | 4.89E-03 | 0.12        | 0.03 | 4.38E-01 |
| SLC6A13   | No            | Yes            | No                                     | Up                        | 1.78                             | 1.83E-19            | 1.5E-19    | 1.69                                | 0.13 | 2.18E-05 | 1.34        | 0.04 | 1.00E-20 | 0.74         | 0.11 | 4.40E-03 | 0.45     | 0.12 | 1.10E-01 | 0.01     | 0.14 | 9.74E-01 | 0.19         | 0.20 | 7.29E-01 | 1.30         | 0.11 | 4.77E-06 | 0.91        | 0.03 | 2.04E-06 |
| PHC3      | No            | Yes            | No                                     | Up                        | 1.78                             | 8.51E-05            | 0.00383    | 0.85                                | 0.11 | 3.40E-02 | 0.78        | 0.04 | 2.79E-03 | 0.89         | 0.11 | 6.38E-03 | 0.71     | 0.12 | 3.01E-02 | 0.79     | 0.15 | 2.25E-01 | 1.02         | 0.23 | 1.25E-01 | 1.21         | 0.10 | 3.60E-03 | 0.40        | 0.03 | 2.93E-02 |
| FZD7      | No            | Yes            | No                                     | Up                        | 1.78                             | 1.83E-19            | 0.00023    | 0.64                                | 0.11 | 7.67E-03 | 0.75        | 0.04 | 2.18E-05 | 0.78         | 0.11 | 1.75E-03 | 1.54     | 0.14 | 7.50E-06 | 0.98     | 0.15 | 8.85E-03 | 0.86         | 0.22 | 1.95E-02 | 0.39         | 0.10 | 6.38E-02 | 0.70        | 0.03 | 9.68E-05 |
| PBX2      | No            | Yes            | No                                     | Up                        | 1.78                             | 9.89E-06            | 8.9E-06    | 1.46                                | 0.12 | 2.14E-04 | 0.77        | 0.04 | 8.56E-04 | 0.68         | 0.11 | 9.35E-02 | 0.88     | 0.12 | 2.74E-02 | 0.16     | 0.14 | 4.59E-01 | 0.60         | 0.21 | 1.10E-01 | 1.67         | 0.11 | 1.67E-04 | 0.45        | 0.03 | 5.99E-02 |
| CYTL1     | No            | No             | No                                     | Up                        | 1.78                             | 1.83E-19            | 0.00024    | 0.46                                | 0.10 | 4.29E-02 | 0.76        | 0.04 | 7.29E-05 | 0.91         | 0.11 | 1.54E-03 | 1.66     | 0.15 | 9.09E-07 | 0.84     | 0.15 | 8.70E-03 | 1.04         | 0.23 | 6.59E-03 | 0.03         | 0.10 | 9.19E-01 | 0.96        | 0.03 | 1.00E-20 |
| C20ORF27  | No            | Yes            | Yes                                    | Up                        | 1.78                             | 5.41E-05            | 0.00011    | 1.13                                | 0.11 | 2.06E-03 | 0.38        | 0.04 | 4.60E-02 | 1.70         | 0.13 | 6.05E-04 | 1.29     | 0.14 | 2.84E-03 | 0.24     | 0.14 | 3.11E-01 | 1.31         | 0.24 | 9.87E-03 | 0.29         | 0.10 | 4.27E-01 | 0.32        | 0.03 | 8.28E-02 |
| PPT1      | No            | Yes            | No                                     | Up                        | 1.78                             | 2.19E-05            | 0.00123    | 1.44                                | 0.12 | 2.49E-04 | 0.19        | 0.04 | 2.10E-01 | 1.37         | 0.12 | 4.15E-03 | 1.44     | 0.14 | 1.80E-03 | 0.76     | 0.15 | 9.10E-03 | 0.75         | 0.21 | 2.63E-02 | 0.16         | 0.10 | 4.79E-01 | 0.54        | 0.03 | 6.81E-02 |
| C16ORF5   | No            | No             | No                                     | Up                        | 1.78                             | 6.71E-06            | 0.04148    | 1.23                                | 0.12 | 9.50E-04 | 0.58        | 0.04 | 6.19E-03 | 0.87         | 0.11 | 1.61E-02 | 1.09     | 0.16 | 1.23E-05 | 0.81     | 0.15 | 9.54E-02 | 0.26         | 0.20 | 4.85E-01 | 0.58         | 0.10 | 5.68E-02 | 0.44        | 0.03 | 3.14E-02 |
| CPT1C     | No            | No             | No                                     | Up                        | 1.78                             | 1.83E-19            | 0.03226    | 1.31                                | 0.12 | 1.52E-05 | 1.04        | 0.04 | 3.16E-06 | 0.28         | 0.10 | 3.00E-01 | 1.85     | 0.13 | 8.35E-04 | 0.92     | 0.15 | 1.46E-02 | 1.00         | 0.23 | 2.39E-02 | 0.27         | 0.10 | 3.60E-01 | 0.80        | 0.03 | 1.77E-05 |
| RBM11     | No            | Yes            | No                                     | Up                        | 1.78                             | 5.03E-05            | 1.5E-19    | 0.86                                | 0.11 | 2.94E-03 | 0.72        | 0.04 | 1.24E-03 | 1.38         | 0.12 | 9.42E-04 | 0.20     | 0.11 | 5.35E-01 | 0.65     | 0.14 | 4.99E-01 | 1.04         | 0.23 | 3.19E-01 | 1.37         | 0.11 | 6.43E-03 | 0.51        | 0.03 | 8.83E-03 |
| CUL4      | No            | Yes            | No                                     | Up                        | 1.79                             | 0.00021             | 0.00423    | 1.51                                | 0.12 | 2.62E-04 | 0.99        | 0.04 | 6.64E-04 | 0.53         | 0.11 | 1.93E-01 | 0.15     | 0.11 | 5.92E-01 | 0.27     | 0.14 | 6.82E-01 | 1.07         | 0.23 | 2.23E-01 | 1.86         | 0.11 | 5.71E-04 | 0.27        | 0.03 | 1.45E-01 |
| PEPD      | No            | Yes            | No                                     | Up                        | 1.79                             | 1.14E-05            | 2.6E-05    | 1.36                                | 0.12 | 1.05E-03 | 0.43        | 0.04 | 3.66E-02 | 0.55         | 0.11 | 1.40E-01 | 1.16     | 0.13 | 1.35E-02 | 0.93     | 0.15 | 3.40E-03 | 1.33         | 0.24 | 9.02E-04 | 0.21         | 0.10 | 4.50E-01 | 0.74        | 0.03 | 6.94E-03 |
| SRCRB4D   | No            | Yes            | No                                     | Up                        | 1.79                             | 1.83E-19            | 1.5E-19    | 1.76                                | 0.13 | 6.82E-07 | 1.35        | 0.04 | 1.00E-20 | 0.41         | 0.10 | 2.57E-01 | 0.55     | 0.12 | 8.45E-02 | 0.40     | 0.14 | 6.69E-01 | 0.93         | 0.22 | 5.98E-01 | 0.88         | 0.10 | 4.82E-02 | 0.43        | 0.03 | 2.43E-02 |
| ALK       | No            | Yes            | No                                     | Up                        | 1.79                             | 1.14E-05            | 1          |                                     |      |          |             |      |          |              |      |          |          |      |          |          |      |          |              |      |          |              |      |          |             |      |          |

**Supplementary Table 2. Details for 2,053 genes differentially expressed between EEC and NEEC, identified by microarray meta-analysis.**  
 EEC - endometrioid endometrial cancer, NEEC - non-endometrioid endometrial cancer, SMD - Standardised Mean Difference, FDR - False Discovery Rate, Var - Variance

| Gene     | 145 gene list | 1253 gene list | Associated with EEC-specific survival? | Up/Down Regulated in NEEC | average standardised fold change | Microarray Meta FDR | RNAseq FDR | Individual microarray study results |      |          |             |      |          |              |      |          |          |      |          |          |      |          |              |      |          |              |      |          |             |      |          |
|----------|---------------|----------------|----------------------------------------|---------------------------|----------------------------------|---------------------|------------|-------------------------------------|------|----------|-------------|------|----------|--------------|------|----------|----------|------|----------|----------|------|----------|--------------|------|----------|--------------|------|----------|-------------|------|----------|
|          |               |                |                                        |                           |                                  |                     |            | TCGA                                |      |          | E-MTAB-2532 |      |          | E-GEOD-56026 |      |          | GSE32507 |      |          | GSE24537 |      |          | E-GEOD-23518 |      |          | E-GEOD-17025 |      |          | E-GEOD-2109 |      |          |
|          |               |                |                                        |                           |                                  |                     |            | SMD                                 | Var  | P-value  | SMD         | Var  | P-value  | SMD          | Var  | P-value  | SMD      | Var  | P-value  | SMD      | Var  | P-value  | SMD          | Var  | P-value  | SMD          | Var  | P-value  | SMD         | Var  | P-value  |
| STX1A    | No            | No             | No                                     | Up                        | 1.81                             | 1.14E-05            | 0.00308    | 1.25                                | 0.12 | 5.14E-03 | 1.04        | 0.04 | 5.68E-06 | 0.77         | 0.11 | 9.15E-02 | 0.02     | 0.11 | 9.37E-01 | 1.18     | 0.16 | 4.42E-02 | 0.92         | 0.22 | 1.20E-01 | 1.16         | 0.10 | 9.26E-03 | 0.50        | 0.03 | 1.28E-02 |
| PFKM     | No            | Yes            | Yes                                    | Up                        | 1.81                             | 1.83E-19            | 8.9E-05    | 0.56                                | 0.10 | 3.86E-02 | 0.93        | 0.04 | 2.41E-05 | 0.74         | 0.11 | 1.20E-02 | 1.23     | 0.13 | 2.36E-03 | 0.94     | 0.15 | 1.45E-02 | 1.50         | 0.26 | 2.64E-03 | 0.08         | 0.10 | 7.14E-01 | 0.90        | 0.03 | 4.15E-04 |
| UST      | No            | Yes            | No                                     | Up                        | 1.82                             | 1.83E-19            | 1.5E-19    | 0.98                                | 0.11 | 6.78E-04 | 0.46        | 0.04 | 1.60E-02 | 1.35         | 0.12 | 4.20E-05 | 1.06     | 0.13 | 6.15E-04 | 0.93     | 0.15 | 2.53E-02 | 0.67         | 0.21 | 9.05E-02 | 1.02         | 0.10 | 3.54E-03 | 0.41        | 0.03 | 2.99E-02 |
| NUP155   | No            | Yes            | No                                     | Up                        | 1.82                             | 1.83E-19            | 0.00158    | 0.97                                | 0.11 | 6.79E-03 | 0.88        | 0.04 | 1.54E-04 | 0.72         | 0.11 | 3.39E-02 | 1.32     | 0.14 | 2.27E-03 | 0.99     | 0.15 | 8.53E-03 | 0.80         | 0.22 | 3.75E-02 | 0.24         | 0.10 | 3.02E-01 | 0.96        | 0.03 | 2.95E-04 |
| CAMTA1   | No            | Yes            | No                                     | Up                        | 1.82                             | 1.83E-19            | 0.00347    | 1.02                                | 0.11 | 3.98E-03 | 1.21        | 0.04 | 4.54E-06 | 1.50         | 0.12 | 6.82E-06 | 0.84     | 0.12 | 2.57E-03 | 0.91     | 0.15 | 7.33E-02 | 0.50         | 0.21 | 2.47E-01 | 0.08         | 0.10 | 7.34E-01 | 0.83        | 0.03 | 5.45E-06 |
| PTBP2    | No            | Yes            | No                                     | Up                        | 1.82                             | 1.83E-19            | 0.00019    | 0.75                                | 0.11 | 1.65E-02 | 0.92        | 0.04 | 4.02E-05 | 1.59         | 0.12 | 7.00E-05 | 0.50     | 0.12 | 2.37E-01 | 0.67     | 0.14 | 3.54E-02 | 0.99         | 0.22 | 1.50E-02 | 0.95         | 0.10 | 8.18E-03 | 0.52        | 0.03 | 1.44E-02 |
| RNF144A  | No            | Yes            | No                                     | Up                        | 1.82                             | 1.83E-19            | 7.4E-05    | 1.00                                | 0.11 | 6.44E-03 | 0.35        | 0.04 | 6.60E-02 | 0.90         | 0.11 | 4.35E-03 | 0.97     | 0.13 | 7.27E-03 | 1.53     | 0.17 | 1.81E-04 | 0.89         | 0.22 | 1.36E-02 | 0.88         | 0.10 | 1.14E-02 | 0.38        | 0.03 | 2.30E-02 |
| TTK      | No            | Yes            | Yes                                    | Up                        | 1.82                             | 1.83E-19            | 1.5E-19    | 1.19                                | 0.11 | 2.80E-04 | 0.89        | 0.04 | 2.54E-05 | 0.41         | 0.10 | 8.72E-02 | 0.92     | 0.12 | 3.43E-03 | 0.63     | 0.14 | 4.72E-02 | 1.07         | 0.23 | 1.69E-02 | 0.99         | 0.10 | 5.05E-04 | 0.81        | 0.03 | 9.02E-05 |
| RTM4R    | No            | Yes            | No                                     | Up                        | 1.82                             | 0.000331            | 0.0005     | 0.85                                | 0.11 | 4.79E-03 | 0.27        | 0.04 | 1.18E-01 | 1.23         | 0.11 | 2.55E-03 | 1.14     | 0.12 | 2.59E-03 | 0.58     | 0.14 | 2.28E-01 | 1.56         | 0.26 | 5.89E-02 | 1.11         | 0.10 | 3.29E-02 | 0.18        | 0.03 | 3.46E-01 |
| UBE2C    | No            | Yes            | No                                     | Up                        | 1.82                             | 1.83E-19            | 1.5E-19    | 1.03                                | 0.11 | 1.36E-03 | 1.11        | 0.04 | 4.54E-07 | 0.72         | 0.11 | 7.79E-03 | 0.59     | 0.12 | 5.89E-02 | 0.61     | 0.14 | 1.97E-02 | 1.29         | 0.24 | 7.46E-04 | 0.80         | 0.10 | 7.46E-03 | 0.78        | 0.03 | 2.05E-04 |
| E2F6     | No            | No             | No                                     | Up                        | 1.82                             | 4.80E-05            | 0.01552    | 1.14                                | 0.11 | 2.35E-03 | 0.27        | 0.04 | 1.42E-01 | 1.02         | 0.11 | 1.25E-02 | 1.21     | 0.13 | 5.22E-03 | 0.97     | 0.15 | 2.64E-02 | 0.98         | 0.22 | 1.28E-02 | 0.44         | 0.10 | 1.63E-01 | 0.91        | 0.03 | 1.01E-02 |
| CDON     | No            | Yes            | No                                     | Up                        | 1.83                             | 1.83E-19            | 4.1E-05    | 1.09                                | 0.11 | 1.16E-03 | 0.80        | 0.04 | 1.39E-04 | 0.64         | 0.11 | 1.87E-02 | 1.99     | 0.17 | 4.54E-07 | 0.48     | 0.14 | 5.25E-01 | 0.52         | 0.21 | 7.19E-01 | 0.72         | 0.10 | 1.13E-02 | 0.72        | 0.03 | 2.79E-05 |
| DEGS1    | No            | Yes            | No                                     | Up                        | 1.83                             | 1.83E-19            | 1.5E-19    | 1.43                                | 0.12 | 1.39E-04 | 0.38        | 0.04 | 2.20E-02 | 0.93         | 0.11 | 4.22E-03 | 1.02     | 0.13 | 5.39E-03 | 0.80     | 0.15 | 4.16E-03 | 0.48         | 0.21 | 1.06E-01 | 1.17         | 0.10 | 3.14E-04 | 0.75        | 0.03 | 9.56E-04 |
| C19ORF40 | No            | Yes            | Yes                                    | Up                        | 1.83                             | 0.00016             | 1.5E-19    | 0.84                                | 0.11 | 1.24E-02 | 0.65        | 0.04 | 2.79E-02 | 0.68         | 0.11 | 9.01E-02 | 1.46     | 0.14 | 2.93E-04 | 0.44     | 0.14 | 3.62E-01 | 1.34         | 0.24 | 7.07E-02 | 1.01         | 0.10 | 1.11E-02 | 0.54        | 0.03 | 5.38E-02 |
| COL6A6   | No            | No             | No                                     | Up                        | 1.83                             | 1.83E-19            | 0.0003     | 1.28                                | 0.12 | 1.57E-04 | 0.28        | 0.04 | 9.75E-02 | 0.35         | 0.10 | 1.47E-01 | 1.86     | 0.16 | 2.27E-07 | 0.58     | 0.14 | 3.45E-01 | 0.96         | 0.22 | 3.90E-01 | 0.94         | 0.10 | 3.25E-02 | 0.71        | 0.03 | 3.41E-05 |
| GABRE    | No            | Yes            | No                                     | Up                        | 1.83                             | 1.83E-19            | 1.5E-19    | 1.83                                | 0.13 | 6.82E-07 | 0.84        | 0.04 | 4.54E-06 | 0.94         | 0.11 | 2.05E-03 | 0.79     | 0.12 | 6.32E-03 | 0.52     | 0.14 | 2.73E-01 | 0.17         | 0.20 | 6.98E-01 | 1.13         | 0.10 | 2.08E-04 | 0.76        | 0.03 | 4.16E-05 |
| DMRT3    | No            | No             | No                                     | Up                        | 1.83                             | 1.83E-19            | 0.00013    | 0.56                                | 0.10 | 2.86E-02 | 0.29        | 0.04 | 4.83E-02 | 1.24         | 0.12 | 6.00E-05 | 2.62     | 0.20 | 1.00E-20 | 0.08     | 0.14 | 8.62E-01 | 0.89         | 0.22 | 3.00E-01 | 0.68         | 0.10 | 2.58E-01 | 0.64        | 0.03 | 5.02E-05 |
| SLCGA15  | No            | Yes            | No                                     | Up                        | 1.84                             | 1.83E-19            | 1.5E-19    | 0.98                                | 0.11 | 2.33E-03 | 1.00        | 0.04 | 5.43E-04 | 0.97         | 0.11 | 4.94E-03 | 0.72     | 0.12 | 1.74E-02 | 0.81     | 0.15 | 3.74E-01 | 1.13         | 0.23 | 3.13E-01 | 0.47         | 0.10 | 3.13E-01 | 0.93        | 0.03 | 1.00E-20 |
| C7ORF13  | No            | Yes            | No                                     | Up                        | 1.84                             | 1.83E-19            | 1.5E-19    | 0.76                                | 0.11 | 4.35E-03 | 1.16        | 0.04 | 1.20E-05 | 0.81         | 0.11 | 2.76E-02 | 1.34     | 0.14 | 7.77E-05 | 0.38     | 0.14 | 3.70E-01 | 0.81         | 0.22 | 1.31E-01 | 0.74         | 0.10 | 5.42E-02 | 1.05        | 0.04 | 3.86E-06 |
| ARHGAP28 | No            | Yes            | No                                     | Up                        | 1.84                             | 1.83E-19            | 0.00015    | 1.04                                | 0.11 | 2.15E-03 | 1.24        | 0.04 | 4.54E-07 | 0.89         | 0.11 | 1.80E-03 | 1.42     | 0.14 | 2.79E-05 | 1.03     | 0.15 | 6.60E-02 | 0.63         | 0.21 | 1.91E-01 | 0.42         | 0.10 | 1.26E-01 | 0.40        | 0.03 | 9.41E-03 |
| TIMP2    | No            | Yes            | No                                     | Up                        | 1.85                             | 1.83E-19            | 0.00529    | 1.15                                | 0.11 | 1.26E-04 | 1.27        | 0.04 | 4.54E-07 | 0.41         | 0.10 | 1.04E-01 | 0.68     | 0.12 | 2.08E-02 | 1.18     | 0.16 | 2.17E-04 | 1.08         | 0.23 | 2.15E-03 | 0.64         | 0.10 | 1.60E-02 | 0.66        | 0.03 | 5.89E-04 |
| FXYD6    | No            | Yes            | No                                     | Up                        | 1.85                             | 1.83E-19            | 1.5E-19    | 1.55                                | 0.12 | 5.91E-06 | 0.32        | 0.04 | 2.80E-02 | 1.12         | 0.11 | 2.76E-04 | 0.93     | 0.12 | 2.69E-03 | 0.66     | 0.14 | 1.71E-02 | 1.01         | 0.23 | 6.27E-03 | 0.56         | 0.10 | 3.20E-02 | 0.93        | 0.03 | 3.41E-06 |
| ZBTB46   | No            | Yes            | No                                     | Up                        | 1.85                             | 1.83E-19            | 1.5E-19    | 0.78                                | 0.11 | 3.14E-02 | 0.45        | 0.04 | 1.32E-02 | 1.59         | 0.12 | 2.16E-05 | 1.10     | 0.13 | 2.01E-03 | 1.22     | 0.16 | 4.07E-03 | 1.91         | 0.22 | 2.81E-02 | 0.77         | 0.10 | 6.58E-03 | 0.29        | 0.03 | 8.95E-02 |
| RC3H2    | No            | Yes            | No                                     | Up                        | 1.85                             | 3.58E-06            | 0.00028    | 0.95                                | 0.11 | 7.85E-03 | 0.61        | 0.04 | 6.93E-03 | 1.17         | 0.11 | 7.67E-04 | 0.62     | 0.12 | 7.00E-02 | 1.19     | 0.16 | 7.13E-03 | 1.33         | 0.24 | 1.08E-02 | 1.03         | 0.10 | 1.50E-03 | 0.21        | 0.03 | 1.77E-01 |
| RNF212   | No            | Yes            | No                                     | Up                        | 1.85                             | 1.83E-19            | 1.5E-19    | 1.08                                | 0.11 | 4.96E-04 | 1.00        | 0.04 | 1.24E-04 | 0.39         | 0.10 | 2.82E-01 | 0.40     | 0.12 | 1.20E-01 | 1.05     | 0.15 | 4.38E-02 | 1.45         | 0.25 | 7.54E-03 | 0.86         | 0.10 | 7.41E-02 | 0.87        | 0.03 | 3.63E-06 |
| CCDC90A  | No            | No             | No                                     | Up                        | 1.85                             | 3.58E-06            | 0.0074     | 1.48                                | 0.12 | 3.62E-04 | 0.63        | 0.04 | 5.53E-03 | 0.60         | 0.11 | 5.80E-02 | 1.02     | 0.13 | 2.40E-02 | 1.01     | 0.15 | 9.05E-03 | 0.76         | 0.21 | 4.85E-02 | 0.82         | 0.10 | 4.75E-03 | 0.78        | 0.03 | 1.32E-02 |
| MAGEL2   | No            | Yes            | Yes                                    | Up                        | 1.85                             | 1.83E-19            | 1.5E-19    | 0.97                                | 0.11 | 3.66E-04 | 0.82        | 0.04 | 1.41E-05 | 0.95         | 0.11 | 5.31E-03 | 0.74     | 0.12 | 5.47E-03 | 0.96     | 0.15 | 8.34E-02 | 0.72         | 0.21 | 1.80E-01 | 0.96         | 0.10 | 1.06E-02 | 0.98        | 0.03 | 1.00E-20 |
| HAPLN4   | No            | Yes            | No                                     | Up                        | 1.85                             | 1.83E-19            | 1.5E-19    | 0.97                                | 0.11 | 6.41E-02 | 0.99        | 0.04 | 1.35E-04 | 1.16         | 0.11 | 4.14E-03 | 0.82     | 0.12 | 7.14E-03 | 0.66     | 0.14 | 2.44E-01 | 0.65         | 0.21 | 2.86E-01 | 0.95         | 0.10 | 3.94E-02 | 0.91        | 0.03 | 9.09E-07 |
| BLCAP    | No            | Yes            | No                                     | Up                        | 1.85                             | 3.58E-06            | 0.00021    | 1.37                                | 0.12 | 2.57E-03 | 0.61        | 0.04 | 1.06E-02 | 1.06         | 0.11 | 6.81E-03 | 0.86     | 0.12 | 2.70E-02 | 0.72     | 0.14 | 2.31E-02 | 0.73         | 0.21 | 5.15E-02 | 0.78         | 0.10 | 1.82E-02 | 0.99        | 0.03 | 4.27E-04 |
| CSORF34  | No            | Yes            | No                                     | Up                        | 1.85                             | 3.58E-06            | 4.6E-06    | 1.25                                | 0.12 | 3.08E-04 | 0.95        | 0.04 | 2.92E-04 | 1.18         | 0.10 | 5.17E-01 | 1.35     | 0.14 | 2.33E-03 | 0.74     | 0.14 | 1.31E-01 | 1.12         | 0.23 | 5.23E-02 | 0.68         | 0.10 | 3.51E-02 | 0.86        | 0.03 | 1.34E-03 |
| DNMT3A   | No            | Yes            | No                                     | Up                        | 1.85                             | 1.14E-05            | 0.00051    | 1.56                                | 0.12 | 6.52E-05 | 1.16        | 0.04 | 6.36E-06 | 1.25         | 0.12 | 5.64E-04 | 0.05     | 0.11 | 8.78E-01 | 1.11     | 0.15 | 3.60E-01 | 1.54         | 0.26 | 2.78E-01 | 0.31         | 0.10 | 1.92E-01 | 0.16        | 0.03 | 3.91E-01 |
| CCDC23   | No            | Yes            | No                                     | Up                        | 1.86                             | 1.83E-19            | 0.00043    | 0.40                                | 0.10 | 2.17E-01 | 0.83        | 0.04 | 5.47E-04 | 1.06         | 0.11 | 7.94E-03 | 0.95     | 0.12 | 5.75E-02 | 1.61     | 0.18 | 8.91E-05 | 1.37         | 0.25 | 1.21E-03 | 0.41         | 0.10 | 1.36E-01 | 0.50        | 0.03 | 5.20E-03 |
| KLRG2    | No            | Yes            | Yes                                    | Up                        | 1.86                             | 1.83E-19            | 1.5E-19    | 1.44                                | 0.12 | 2.61E-05 | 1.22        | 0.04 | 6.82E-07 | 1.53         | 0.12 | 4.48E-05 | 0.55     | 0.12 | 3.28E-02 | 0.57     | 0.14 | 5.52E-01 | 0.72         | 0.21 | 3.32E-01 | 0.66         | 0.10 | 8.05E-02 | 0.47        | 0.03 | 5.81E-03 |
| GFP2     | No            | No             | No                                     | Up                        | 1.86                             | 1.83E-19            | validated  | 0.50                                | 0.10 | 7.18E-02 | 0.24        | 0.04 | 1.03E-01 | 0.21         | 0.10 | 4.26E-01 | 1.26     | 0.13 | 1.81E-04 | 1.92     | 0.19 | 3.58E-04 | 1.37         | 0.25 | 1.50E-02 | 0.80         | 0.10 | 7.98E-03 | 0.87        | 0.03 | 1.73E-05 |
| ABCF1    | No            | Yes            | No                                     | Up                        | 1.86                             | 1.14E-05            | 0.01271    | 1.31                                | 0.12 | 7.20E-03 | 0.73        | 0.04 | 1.94E-03 | 0.72         | 0.11 | 8.38E-02 | 1.05     | 0.13 | 3.32E-02 | 1.15     | 0.16 | 8.51E-04 | 1.10         | 0.23 | 3.20E-03 | 0.17         | 0.10 | 5.26E-01 | 0.96        | 0.03 | 1.15E-02 |
| KIF7     | No            | No             | No                                     | Up                        | 1.86                             | 1.83E-19            | 0.00406    | 0.59                                | 0.10 | 4.56E-02 | 0.83        | 0.04 | 3.13E-04 | 0.80         | 0.11 | 6.36E-02 | 1.39     | 0.14 | 2.87E-04 | 0.65     | 0.14 | 1.36E-01 | 1.00         | 0.23 | 3.81E-02 | 1.11         | 0.10 | 8.53E-03 | 0.81        | 0.03 | 4.45E-05 |
| ARHGAP23 | No            | Yes            | No                                     | Up                        | 1.86                             | 1.83E-19            | 1.5E-19    | 0.89                                | 0.11 | 6.96E-03 | 0.63        | 0.04 | 2.03E-03 | 0.76         | 0.11 | 3.21E-02 | 0.95     | 0.12 | 8.39E-03 | 0.92     | 0.15 | 4.16E-03 | 0.90         | 0.22 | 1.27E-02 | 1.76         | 0.11 | 1.28E-04 | 0.40        | 0.03 | 2.02E-02 |
| TUB      | No            | Yes            | No                                     | Up                        | 1.                               |                     |            |                                     |      |          |             |      |          |              |      |          |          |      |          |          |      |          |              |      |          |              |      |          |             |      |          |



**Supplementary Table 2. Details for 2,053 genes differentially expressed between EEC and NEEC, identified by microarray meta-analysis.**  
 EEC - endometrioid endometrial cancer, NEEC - non-endometrioid endometrial cancer, SMD - Standardised Mean Difference, FDR - False Discovery Rate, Var - Variance

| Gene     | 145 gene list | 1253 gene list | Associated with EEC-specific survival? | Up/Down Regulated in NEEC | average standardised fold change | Microarray Meta FDR | RNAseq FDR | Individual microarray study results |      |          |             |      |          |              |      |          |          |      |          |          |      |          |              |      |          |              |      |          |             |      |          |
|----------|---------------|----------------|----------------------------------------|---------------------------|----------------------------------|---------------------|------------|-------------------------------------|------|----------|-------------|------|----------|--------------|------|----------|----------|------|----------|----------|------|----------|--------------|------|----------|--------------|------|----------|-------------|------|----------|
|          |               |                |                                        |                           |                                  |                     |            | TCGA                                |      |          | E-MTAB-2532 |      |          | E-GEOD-56026 |      |          | GSE32507 |      |          | GSE24537 |      |          | E-GEOD-23518 |      |          | E-GEOD-17025 |      |          | E-GEOD-2109 |      |          |
|          |               |                |                                        |                           |                                  |                     |            | SMD                                 | Var  | P-value  | SMD         | Var  | P-value  | SMD          | Var  | P-value  | SMD      | Var  | P-value  | SMD      | Var  | P-value  | SMD          | Var  | P-value  | SMD          | Var  | P-value  | SMD         | Var  | P-value  |
| PXDN     | No            | Yes            | No                                     | Up                        | 1.90                             | 1.83E-19            | 2.6E-05    | 0.88                                | 0.11 | 2.84E-03 | 1.08        | 0.04 | 4.54E-07 | 0.92         | 0.11 | 9.22E-04 | 1.02     | 0.13 | 8.83E-04 | 1.04     | 0.15 | 3.46E-03 | 0.69         | 0.21 | 5.16E-02 | 0.67         | 0.10 | 1.08E-02 | 1.10        | 0.04 | 6.82E-07 |
| HPDL     | No            | Yes            | No                                     | Up                        | 1.90                             | 1.83E-19            | 1.5E-19    | 1.33                                | 0.12 | 8.27E-05 | 1.24        | 0.04 | 1.00E-20 | 0.77         | 0.11 | 3.93E-02 | 0.21     | 0.11 | 3.98E-01 | 0.41     | 0.14 | 3.99E-01 | 1.14         | 0.23 | 1.36E-01 | 1.25         | 0.10 | 3.69E-03 | 1.07        | 0.04 | 1.00E-20 |
| HOXA2    | No            | Yes            | No                                     | Up                        | 1.90                             | 1.83E-19            | 1.5E-19    | 1.61                                | 0.13 | 4.54E-06 | 1.88        | 0.04 | 1.23E-05 | 1.39         | 0.12 | 2.09E-04 | 0.21     | 0.11 | 3.64E-01 | 0.99     | 0.15 | 1.36E-01 | 0.68         | 0.21 | 3.66E-01 | 1.16         | 0.10 | 1.26E-03 | 1.50        | 0.03 | 5.26E-03 |
| ZFP64    | No            | Yes            | No                                     | Up                        | 1.90                             | 0.000159            | 0.00266    | 1.01                                | 0.11 | 6.21E-02 | 0.59        | 0.04 | 1.03E-02 | 1.09         | 0.11 | 1.18E-02 | 1.36     | 0.14 | 2.68E-03 | 1.31     | 0.16 | 1.19E-01 | 0.98         | 0.22 | 1.58E-01 | 0.55         | 0.10 | 7.38E-02 | 0.52        | 0.03 | 4.86E-03 |
| LMO3     | No            | Yes            | No                                     | Up                        | 1.90                             | 1.83E-19            | 1.5E-19    | 1.33                                | 0.12 | 3.41E-06 | 0.29        | 0.04 | 4.05E-02 | 1.04         | 0.11 | 2.09E-04 | 0.57     | 0.12 | 1.80E-02 | 1.19     | 0.16 | 8.30E-04 | 1.13         | 0.23 | 3.25E-03 | 1.43         | 0.11 | 3.86E-06 | 0.43        | 0.03 | 6.60E-03 |
| YTHDF1   | No            | No             | No                                     | Up                        | 1.90                             | 9.89E-06            | 0.01919    | 1.51                                | 0.12 | 3.75E-03 | 1.32        | 0.04 | 1.29E-05 | 0.75         | 0.11 | 7.09E-02 | 0.45     | 0.12 | 2.96E-01 | 1.32     | 0.16 | 9.56E-04 | 1.15         | 0.23 | 5.99E-03 | 0.25         | 0.10 | 4.61E-01 | 0.68        | 0.03 | 8.79E-02 |
| TMT1C    | No            | Yes            | No                                     | Up                        | 1.90                             | 1.83E-19            | 1.5E-19    | 0.72                                | 0.11 | 5.47E-03 | 0.92        | 0.04 | 5.23E-06 | 0.29         | 0.10 | 2.02E-01 | 1.07     | 0.13 | 6.21E-04 | 1.14     | 0.16 | 3.75E-03 | 1.70         | 0.27 | 7.40E-04 | 0.65         | 0.10 | 1.30E-02 | 0.95        | 0.03 | 2.27E-07 |
| DHX35    | No            | No             | No                                     | Up                        | 1.91                             | 3.97E-05            | 0.00044    | 1.54                                | 0.12 | 2.29E-04 | 0.73        | 0.04 | 3.74E-03 | 1.20         | 0.11 | 1.58E-03 | 0.52     | 0.12 | 3.02E-01 | 1.03     | 0.15 | 8.67E-02 | 1.52         | 0.26 | 3.54E-02 | 0.65         | 0.10 | 7.53E-02 | 0.25        | 0.03 | 1.10E-01 |
| KCNJ3    | No            | Yes            | No                                     | Up                        | 1.91                             | 1.83E-19            | 1.5E-19    | 0.97                                | 0.11 | 2.04E-03 | 1.04        | 0.04 | 2.20E-05 | 0.70         | 0.11 | 6.01E-02 | 0.98     | 0.13 | 2.79E-03 | 1.31     | 0.16 | 3.26E-03 | 1.03         | 0.23 | 8.59E-03 | 0.75         | 0.10 | 4.62E-02 | 0.67        | 0.03 | 1.18E-03 |
| DVL3     | No            | Yes            | No                                     | Up                        | 1.91                             | 1.14E-05            | 0.0045     | 1.83                                | 0.13 | 9.09E-04 | 0.67        | 0.04 | 4.42E-03 | 0.80         | 0.11 | 3.89E-02 | 0.39     | 0.12 | 4.42E-01 | 0.71     | 0.14 | 6.13E-02 | 1.06         | 0.23 | 2.15E-02 | 1.70         | 0.11 | 7.97E-05 | 0.32        | 0.03 | 6.76E-02 |
| ZNF302   | No            | Yes            | No                                     | Up                        | 1.91                             | 1.83E-19            | 4E-05      | 1.13                                | 0.11 | 7.06E-04 | 0.55        | 0.04 | 3.17E-03 | 1.34         | 0.12 | 2.03E-04 | 1.76     | 0.15 | 2.36E-05 | 0.59     | 0.14 | 3.69E-02 | 0.94         | 0.22 | 1.19E-02 | 0.01         | 0.10 | 9.47E-01 | 1.15        | 0.04 | 1.36E-06 |
| RBMS1    | No            | Yes            | No                                     | Up                        | 1.92                             | 1.83E-19            | 6E-05      | 1.07                                | 0.11 | 1.75E-03 | 0.46        | 0.04 | 1.71E-02 | 1.08         | 0.11 | 1.34E-03 | 1.46     | 0.14 | 3.87E-04 | 1.03     | 0.15 | 1.83E-03 | 1.12         | 0.23 | 4.31E-03 | 0.80         | 0.10 | 1.04E-02 | 0.48        | 0.03 | 3.13E-02 |
| TMEFF2   | No            | Yes            | No                                     | Up                        | 1.92                             | 1.83E-19            | 1.5E-19    | 1.44                                | 0.12 | 4.57E-05 | 0.48        | 0.04 | 3.53E-03 | 0.36         | 0.10 | 1.04E-01 | 1.61     | 0.15 | 2.04E-06 | 0.47     | 0.14 | 4.97E-01 | 1.20         | 0.24 | 2.09E-01 | 1.51         | 0.11 | 2.04E-06 | 0.46        | 0.03 | 2.54E-03 |
| PIK3CA   | No            | Yes            | No                                     | Up                        | 1.92                             | 1.83E-19            | 1.5E-19    | 1.40                                | 0.12 | 3.52E-04 | 0.85        | 0.04 | 6.82E-04 | 1.30         | 0.12 | 8.11E-04 | 0.96     | 0.13 | 4.71E-02 | 0.33     | 0.14 | 6.12E-01 | 0.81         | 0.22 | 3.74E-01 | 1.54         | 0.11 | 9.77E-06 | 0.33        | 0.03 | 1.20E-01 |
| RFC4     | No            | Yes            | Yes                                    | Up                        | 1.92                             | 1.83E-19            | 2.3E-06    | 1.37                                | 0.12 | 1.39E-04 | 0.99        | 0.04 | 4.43E-05 | 1.03         | 0.11 | 2.89E-03 | 1.21     | 0.13 | 7.51E-03 | 0.38     | 0.14 | 1.33E-01 | 1.13         | 0.23 | 4.00E-03 | 0.35         | 0.10 | 1.76E-01 | 1.06        | 0.04 | 5.29E-05 |
| SORCS2   | No            | Yes            | No                                     | Up                        | 1.92                             | 1.83E-19            | 1.5E-19    | 1.46                                | 0.12 | 4.32E-06 | 0.72        | 0.04 | 2.88E-04 | 0.46         | 0.10 | 1.97E-01 | 0.92     | 0.12 | 1.53E-03 | 1.00     | 0.15 | 1.12E-01 | 1.29         | 0.24 | 4.54E-02 | 0.80         | 0.10 | 6.64E-03 | 0.88        | 0.03 | 1.36E-06 |
| NMU      | No            | Yes            | No                                     | Up                        | 1.92                             | 1.83E-19            | 1.5E-19    | 0.56                                | 0.10 | 2.09E-02 | 1.11        | 0.04 | 1.00E-20 | 1.15         | 0.11 | 1.52E-04 | 0.65     | 0.12 | 1.43E-02 | 1.22     | 0.16 | 1.08E-03 | 1.67         | 0.21 | 6.78E-02 | 1.39         | 0.11 | 2.34E-05 | 0.80        | 0.03 | 3.86E-06 |
| FND4C    | No            | No             | No                                     | Up                        | 1.93                             | 1.83E-19            | 0.01553    | 0.57                                | 0.10 | 3.57E-02 | 0.88        | 0.04 | 1.06E-04 | 0.49         | 0.10 | 1.33E-01 | 1.22     | 0.13 | 2.46E-04 | 1.22     | 0.16 | 4.66E-02 | 1.11         | 0.23 | 7.62E-02 | 1.30         | 0.11 | 1.45E-02 | 0.77        | 0.03 | 4.75E-04 |
| FANCE    | No            | No             | No                                     | Up                        | 1.93                             | 1.83E-19            | 0.00142    | 0.94                                | 0.11 | 4.05E-03 | 0.82        | 0.04 | 2.10E-04 | 0.55         | 0.11 | 1.26E-01 | 1.39     | 0.14 | 1.59E-03 | 0.63     | 0.14 | 1.29E-01 | 1.24         | 0.24 | 2.34E-02 | 1.10         | 0.10 | 4.10E-03 | 0.88        | 0.03 | 3.58E-04 |
| AP1M1    | No            | No             | No                                     | Up                        | 1.93                             | 1.14E-05            | validated  | 1.42                                | 0.12 | 4.56E-03 | 0.84        | 0.04 | 3.18E-03 | 0.68         | 0.11 | 3.66E-02 | 1.50     | 0.14 | 3.86E-02 | 0.61     | 0.14 | 3.86E-02 | 0.56         | 0.21 | 1.03E-01 | 1.54         | 0.11 | 1.42E-04 | 0.41        | 0.03 | 8.88E-02 |
| TSPAN4   | No            | Yes            | No                                     | Up                        | 1.93                             | 1.83E-19            | 0.00032    | 1.56                                | 0.12 | 8.45E-05 | 0.56        | 0.04 | 4.87E-03 | 0.68         | 0.11 | 2.27E-02 | 0.97     | 0.13 | 1.23E-02 | 1.49     | 0.17 | 1.73E-04 | 1.10         | 0.23 | 7.47E-03 | 0.78         | 0.10 | 5.84E-02 | 0.44        | 0.03 | 2.95E-02 |
| IRS2     | No            | Yes            | No                                     | Up                        | 1.93                             | 1.83E-19            | 1.5E-19    | 1.15                                | 0.11 | 2.13E-04 | 0.31        | 0.04 | 4.08E-02 | 1.13         | 0.11 | 1.85E-04 | 0.74     | 0.12 | 8.76E-03 | 1.19     | 0.16 | 2.08E-03 | 1.21         | 0.24 | 6.76E-03 | 1.28         | 0.10 | 1.91E-05 | 0.59        | 0.03 | 9.94E-04 |
| NBOAT2   | No            | Yes            | No                                     | Up                        | 1.93                             | 1.83E-19            | 1.5E-19    | 1.10                                | 0.11 | 1.68E-04 | 1.08        | 0.04 | 4.99E-07 | 1.34         | 0.12 | 2.98E-05 | 1.43     | 0.14 | 2.45E-05 | 1.03     | 0.15 | 2.10E-01 | 0.26         | 0.20 | 4.16E-01 | 0.66         | 0.10 | 1.98E-02 | 0.71        | 0.03 | 6.33E-04 |
| ADA      | No            | Yes            | Yes                                    | Up                        | 1.93                             | 1.83E-19            | 1.5E-19    | 0.45                                | 0.10 | 1.62E-01 | 1.23        | 0.04 | 5.54E-07 | 0.85         | 0.11 | 8.97E-03 | 0.72     | 0.12 | 3.61E-02 | 1.37     | 0.16 | 2.70E-03 | 0.78         | 0.22 | 5.06E-02 | 1.25         | 0.10 | 4.58E-04 | 0.94        | 0.03 | 1.14E-06 |
| PINMA2   | No            | Yes            | No                                     | Up                        | 1.94                             | 1.83E-19            | 2.3E-06    | 0.60                                | 0.10 | 8.13E-02 | 1.03        | 0.04 | 5.91E-06 | 1.32         | 0.12 | 2.57E-05 | 2.02     | 0.17 | 1.00E-20 | 0.58     | 0.14 | 7.48E-02 | 0.56         | 0.21 | 3.07E-01 | 1.34         | 0.11 | 5.43E-05 | 0.18        | 0.03 | 2.49E-01 |
| FAM55C   | No            | Yes            | No                                     | Up                        | 1.94                             | 3.58E-06            | 0.00131    | 1.32                                | 0.12 | 1.21E-04 | 0.78        | 0.04 | 6.67E-04 | 0.51         | 0.11 | 8.89E-02 | 1.50     | 0.14 | 1.07E-04 | 0.76     | 0.15 | 4.45E-01 | 1.21         | 0.24 | 4.67E-01 | 1.31         | 0.11 | 2.10E-03 | 0.24        | 0.03 | 1.38E-01 |
| ZDBF2    | No            | Yes            | No                                     | Up                        | 1.94                             | 1.83E-19            | 1.5E-19    | 0.71                                | 0.11 | 4.74E-03 | 0.74        | 0.04 | 1.32E-04 | 0.95         | 0.11 | 7.84E-04 | 0.61     | 0.12 | 2.03E-02 | 0.51     | 0.14 | 6.72E-01 | 1.96         | 0.30 | 4.29E-01 | 1.34         | 0.11 | 7.66E-05 | 0.83        | 0.03 | 4.50E-05 |
| NPTX2    | No            | No             | No                                     | Up                        | 1.94                             | 1.83E-19            | 0.01994    | 1.06                                | 0.11 | 8.56E-05 | 0.95        | 0.04 | 1.59E-06 | 0.47         | 0.10 | 5.13E-02 | 1.40     | 0.14 | 2.14E-05 | 0.82     | 0.15 | 4.12E-03 | 0.82         | 0.22 | 1.29E-02 | 1.16         | 0.10 | 1.54E-04 | 0.97        | 0.03 | 1.00E-20 |
| MTCX1    | No            | Yes            | No                                     | Up                        | 1.94                             | 1.83E-19            | 0.00191    | 1.35                                | 0.12 | 5.54E-04 | 1.11        | 0.04 | 4.40E-01 | 1.24         | 0.12 | 1.59E-02 | 1.49     | 0.14 | 3.24E-04 | 0.52     | 0.14 | 3.56E-02 | 1.76         | 0.28 | 2.11E-05 | 0.43         | 0.10 | 1.88E-01 | 0.74        | 0.03 | 4.26E-02 |
| CRTAC1   | No            | Yes            | No                                     | Up                        | 1.94                             | 1.83E-19            | 1.5E-19    | 1.29                                | 0.12 | 3.66E-05 | 0.96        | 0.04 | 8.86E-06 | 0.99         | 0.11 | 8.51E-03 | 1.33     | 0.14 | 9.54E-05 | 1.06     | 0.15 | 3.87E-03 | 0.95         | 0.22 | 8.25E-03 | 0.44         | 0.10 | 2.96E-01 | 0.65        | 0.03 | 6.07E-04 |
| MLL1T1   | No            | No             | No                                     | Up                        | 1.95                             | 1.83E-19            | 0.02831    | 0.60                                | 0.10 | 1.48E-02 | 0.96        | 0.04 | 3.18E-06 | 0.79         | 0.11 | 5.79E-03 | 1.90     | 0.16 | 2.04E-06 | 0.78     | 0.15 | 6.67E-03 | 1.42         | 0.25 | 3.37E-04 | 0.31         | 0.10 | 1.72E-01 | 0.91        | 0.03 | 5.45E-06 |
| ATAD2    | No            | Yes            | No                                     | Up                        | 1.95                             | 1.83E-19            | 4E-05      | 1.75                                | 0.13 | 1.16E-05 | 0.91        | 0.04 | 1.23E-05 | 0.88         | 0.11 | 2.95E-03 | 1.12     | 0.13 | 1.93E-03 | 0.62     | 0.14 | 5.99E-02 | 0.93         | 0.22 | 2.71E-02 | 0.87         | 0.10 | 1.42E-03 | 0.61        | 0.03 | 1.68E-03 |
| TMEFF1   | No            | Yes            | No                                     | Up                        | 1.95                             | 1.83E-19            | 1.5E-19    | 0.81                                | 0.11 | 2.91E-03 | 1.11        | 0.04 | 5.45E-06 | 1.22         | 0.11 | 5.84E-05 | 1.60     | 0.15 | 1.27E-05 | 0.38     | 0.14 | 7.42E-01 | 0.70         | 0.21 | 6.02E-01 | 0.87         | 0.10 | 8.36E-04 | 1.02        | 0.04 | 1.36E-06 |
| SRPX     | No            | Yes            | No                                     | Up                        | 1.95                             | 1.83E-19            | 6.8E-05    | 1.03                                | 0.11 | 3.80E-04 | 0.61        | 0.04 | 3.44E-04 | 0.80         | 0.11 | 2.48E-03 | 1.36     | 0.14 | 2.95E-05 | 1.08     | 0.15 | 7.57E-04 | 1.27         | 0.24 | 1.61E-03 | 0.70         | 0.10 | 1.11E-02 | 0.86        | 0.03 | 2.04E-06 |
| MAGEH1   | No            | Yes            | No                                     | Up                        | 1.95                             | 1.83E-19            | 1.5E-19    | 1.44                                | 0.12 | 1.29E-05 | 0.45        | 0.04 | 5.24E-03 | 0.79         | 0.11 | 6.16E-03 | 0.91     | 0.12 | 4.27E-03 | 0.89     | 0.15 | 2.13E-01 | 1.81         | 0.28 | 5.54E-02 | 0.49         | 0.10 | 6.08E-02 | 0.94        | 0.03 | 2.11E-05 |
| C19ORF12 | No            | No             | No                                     | Up                        | 1.96                             | 1.83E-19            | 1.5E-19    | 1.84                                | 0.13 | 1.68E-05 | 0.83        | 0.04 | 1.55E-03 | 1.00         | 0.11 | 2.68E-03 | 1.96     | 0.13 | 1.47E-02 | 1.02     | 0.15 | 2.63E-03 | 1.04         | 0.23 | 4.22E-03 | 0.83         | 0.10 | 1.25E-02 | 0.23        | 0.03 | 1.42E-01 |
| EFNB3    | No            | No             | No                                     | Up                        | 1.96                             | 1.83E-19            | 0.00141    | 0.77                                | 0.11 | 5.21E-02 | 0.92        | 0.04 | 5.45E-06 | 1.03         | 0.11 | 8.40E-04 | 1.54     | 0.14 | 5.23E-06 | 0.52     | 0.14 | 7.96E-02 | 1.40         | 0.25 | 3.60E-03 | 0.94         | 0.10 | 1.91E-03 | 0.64        | 0.03 | 1.50E-04 |
| DOCK3    | No            | Yes            | No                                     | Up                        | 1.96                             | 1.83E-19            | 1.5E-1     |                                     |      |          |             |      |          |              |      |          |          |      |          |          |      |          |              |      |          |              |      |          |             |      |          |

**Supplementary Table 2. Details for 2,053 genes differentially expressed between EEC and NEEC, identified by microarray meta-analysis.**  
 EEC - endometrioid endometrial cancer, NEEC - non-endometrioid endometrial cancer, SMD - Standardised Mean Difference, FDR - False Discovery Rate, Var - Variance

| Gene       | 145 gene list | 1253 gene list | Associated with EEC-specific survival? | Up/Down Regulated in NEEC | average standardised fold change | Microarray Meta FDR | RNAseq FDR | Individual microarray study results |      |          |             |      |          |              |      |          |          |      |          |          |      |          |              |      |          |              |      |          |             |      |          |
|------------|---------------|----------------|----------------------------------------|---------------------------|----------------------------------|---------------------|------------|-------------------------------------|------|----------|-------------|------|----------|--------------|------|----------|----------|------|----------|----------|------|----------|--------------|------|----------|--------------|------|----------|-------------|------|----------|
|            |               |                |                                        |                           |                                  |                     |            | TCGA                                |      |          | E-MTAB-2532 |      |          | E-GEOD-56026 |      |          | GSE32507 |      |          | GSE24537 |      |          | E-GEOD-23518 |      |          | E-GEOD-17025 |      |          | E-GEOD-2109 |      |          |
|            |               |                |                                        |                           |                                  |                     |            | SMD                                 | Var  | P-value  | SMD         | Var  | P-value  | SMD          | Var  | P-value  | SMD      | Var  | P-value  | SMD      | Var  | P-value  | SMD          | Var  | P-value  | SMD          | Var  | P-value  | SMD         | Var  | P-value  |
| CHMP4A     | Yes           | No             | No                                     | Down                      | 0.47                             | 1.83E-19            | 0.02308    | -0.85                               | 0.11 | 1.68E-02 | -0.55       | 0.04 | 2.31E-02 | -0.41        | 0.10 | 2.04E-01 | -0.07    | 0.11 | 8.84E-01 | -2.18    | 0.21 | 1.02E-04 | -2.72        | 0.38 | 9.29E-05 | -1.17        | 0.10 | 5.25E-04 | -0.79       | 0.03 | 1.29E-02 |
| STX18      | Yes           | Yes            | No                                     | Down                      | 0.47                             | 1.83E-19            | 0.00026    | -0.91                               | 0.11 | 1.18E-03 | -0.99       | 0.04 | 1.36E-06 | -0.76        | 0.11 | 4.40E-03 | -1.58    | 0.15 | 8.86E-05 | -1.07    | 0.15 | 4.27E-03 | -1.10        | 0.23 | 2.76E-02 | -1.36        | 0.11 | 1.16E-05 | -1.04       | 0.04 | 1.00E-20 |
| PTPN3      | Yes           | Yes            | No                                     | Down                      | 0.47                             | 1.83E-19            | 2.6E-05    | -0.88                               | 0.11 | 7.97E-03 | -1.13       | 0.04 | 1.36E-06 | -0.95        | 0.11 | 2.72E-03 | -1.66    | 0.15 | 6.84E-05 | -0.98    | 0.15 | 5.03E-02 | -1.39        | 0.25 | 2.37E-02 | -0.66        | 0.10 | 3.48E-02 | -1.16       | 0.04 | 9.09E-07 |
| SOSM3      | Yes           | Yes            | No                                     | Down                      | 0.47                             | 1.83E-19            | 4.1E-05    | -1.06                               | 0.11 | 6.54E-03 | -0.83       | 0.04 | 4.23E-04 | -1.66        | 0.12 | 1.54E-03 | -1.35    | 0.14 | 7.81E-03 | -0.71    | 0.14 | 1.39E-01 | -1.13        | 0.23 | 7.47E-02 | -1.17        | 0.10 | 3.57E-03 | -0.90       | 0.03 | 8.41E-04 |
| SERINC5    | Yes           | Yes            | No                                     | Down                      | 0.47                             | 1.83E-19            | 0.00082    | -1.11                               | 0.11 | 1.74E-03 | -0.89       | 0.04 | 1.34E-05 | -1.55        | 0.12 | 1.22E-04 | -1.26    | 0.13 | 4.21E-04 | -0.75    | 0.14 | 1.75E-01 | -0.79        | 0.22 | 3.10E-01 | -1.16        | 0.10 | 3.86E-04 | -1.32       | 0.04 | 1.00E-20 |
| DNAJC10    | Yes           | Yes            | No                                     | Down                      | 0.46                             | 1.83E-19            | 0.00025    | -0.95                               | 0.11 | 2.31E-03 | -0.90       | 0.04 | 2.02E-05 | -1.27        | 0.12 | 1.06E-04 | -1.50    | 0.14 | 2.96E-04 | -1.30    | 0.16 | 1.27E-04 | -0.71        | 0.21 | 2.55E-02 | -1.27        | 0.10 | 2.25E-05 | -1.02       | 0.04 | 1.14E-06 |
| RNF183     | Yes           | Yes            | No                                     | Down                      | 0.46                             | 1.83E-19            | 1.5E-19    | -0.98                               | 0.11 | 4.40E-04 | -1.19       | 0.04 | 1.00E-20 | -1.16        | 0.11 | 1.27E-04 | -1.68    | 0.15 | 4.54E-07 | -1.20    | 0.16 | 2.41E-03 | -1.29        | 0.24 | 1.09E-02 | -0.72        | 0.10 | 4.24E-03 | -0.79       | 0.03 | 9.09E-06 |
| CYB5E1     | Yes           | Yes            | No                                     | Down                      | 0.45                             | 1.83E-19            | 0.00038    | -1.59                               | 0.12 | 1.95E-04 | -1.00       | 0.04 | 1.20E-05 | -1.31        | 0.12 | 1.16E-03 | -1.86    | 0.16 | 3.43E-05 | -1.36    | 0.16 | 3.26E-04 | -0.68        | 0.21 | 5.90E-02 | -0.40        | 0.10 | 1.59E-01 | -0.95       | 0.03 | 8.34E-05 |
| KIF13B     | Yes           | Yes            | No                                     | Down                      | 0.45                             | 1.83E-19            | 1.5E-19    | -1.09                               | 0.11 | 2.89E-03 | -1.27       | 0.04 | 6.82E-07 | -1.42        | 0.12 | 2.12E-04 | -1.54    | 0.14 | 2.21E-04 | -0.69    | 0.14 | 3.12E-02 | -1.29        | 0.24 | 2.56E-03 | -0.86        | 0.10 | 6.28E-03 | -1.01       | 0.04 | 5.23E-05 |
| ELP3       | Yes           | Yes            | No                                     | Down                      | 0.45                             | 1.83E-19            | 1.5E-19    | -1.14                               | 0.11 | 3.18E-04 | -0.90       | 0.04 | 7.27E-06 | -1.05        | 0.11 | 4.86E-04 | -1.36    | 0.14 | 3.22E-04 | -1.28    | 0.16 | 1.47E-04 | -1.02        | 0.23 | 4.43E-03 | -1.72        | 0.11 | 1.14E-06 | -0.71       | 0.03 | 3.53E-04 |
| PIGR       | Yes           | Yes            | No                                     | Down                      | 0.45                             | 1.83E-19            | 1.5E-19    | -1.51                               | 0.12 | 6.82E-07 | -1.54       | 0.04 | 1.00E-20 | -1.32        | 0.12 | 2.73E-06 | -1.44    | 0.14 | 6.82E-07 | -0.48    | 0.14 | 4.61E-02 | -0.82        | 0.22 | 1.04E-02 | -0.99        | 0.10 | 6.29E-05 | -1.08       | 0.04 | 1.00E-20 |
| THAP8      | No            | Yes            | No                                     | Up                        | 2.15                             | 2.64E-05            | 0.00022    | 1.25                                | 0.12 | 8.85E-04 | 0.65        | 0.04 | 7.25E-03 | 0.68         | 0.11 | 1.10E-01 | 1.52     | 0.14 | 1.70E-03 | 0.99     | 0.15 | 3.35E-01 | 1.70         | 0.27 | 1.76E-01 | 1.01         | 0.10 | 4.76E-02 | 1.05        | 0.04 | 1.42E-03 |
| TMPPRSS2   | Yes           | Yes            | No                                     | Down                      | 0.45                             | 1.83E-19            | 7.7E-05    | -0.91                               | 0.11 | 1.11E-03 | -1.10       | 0.04 | 4.54E-07 | -0.95        | 0.11 | 1.58E-03 | -1.75    | 0.15 | 7.27E-06 | -1.37    | 0.16 | 6.11E-04 | -1.14        | 0.23 | 8.44E-03 | -1.20        | 0.10 | 5.32E-04 | -0.79       | 0.03 | 2.04E-06 |
| FBP1       | Yes           | Yes            | Yes                                    | Down                      | 0.45                             | 1.83E-19            | 1.5E-19    | -1.27                               | 0.12 | 3.86E-05 | -1.27       | 0.04 | 1.00E-20 | -1.22        | 0.11 | 3.92E-04 | -0.92    | 0.12 | 2.24E-03 | -1.26    | 0.16 | 4.32E-04 | -1.53        | 0.26 | 5.52E-04 | -1.23        | 0.10 | 2.46E-04 | -0.63       | 0.03 | 1.26E-03 |
| ST6GALNAC1 | Yes           | No             | Yes                                    | Down                      | 0.45                             | 1.83E-19            | 0.00444    | -1.52                               | 0.12 | 4.54E-07 | -1.15       | 0.04 | 1.00E-20 | -1.53        | 0.12 | 1.59E-06 | -1.01    | 0.13 | 3.61E-04 | -1.07    | 0.15 | 1.95E-03 | -0.77        | 0.21 | 5.68E-02 | -1.19        | 0.10 | 3.32E-05 | -1.09       | 0.04 | 1.00E-20 |
| RASSF6     | Yes           | Yes            | No                                     | Down                      | 0.44                             | 1.83E-19            | 1.5E-19    | -1.11                               | 0.11 | 1.44E-03 | -0.87       | 0.04 | 2.26E-04 | -1.66        | 0.12 | 1.36E-06 | -1.44    | 0.14 | 2.73E-05 | -1.06    | 0.15 | 1.54E-01 | -1.19        | 0.24 | 1.19E-01 | -0.76        | 0.10 | 4.14E-03 | -1.28       | 0.04 | 1.00E-20 |
| C11ORF52   | Yes           | Yes            | No                                     | Down                      | 0.44                             | 1.83E-19            | 1.5E-19    | -1.28                               | 0.12 | 2.51E-04 | -1.02       | 0.04 | 2.04E-06 | -1.08        | 0.11 | 8.92E-04 | -0.91    | 0.12 | 3.37E-03 | -1.16    | 0.16 | 1.06E-02 | -1.23        | 0.24 | 9.06E-02 | -1.60        | 0.11 | 9.77E-06 | -1.11       | 0.04 | 6.82E-07 |
| CITED4     | Yes           | Yes            | No                                     | Down                      | 0.44                             | 1.83E-19            | 1.5E-19    | -1.63                               | 0.13 | 2.04E-06 | -0.96       | 0.04 | 7.72E-06 | -0.67        | 0.11 | 3.07E-02 | -1.86    | 0.16 | 4.32E-06 | -1.14    | 0.16 | 4.11E-04 | -1.54        | 0.26 | 1.67E-04 | -0.54        | 0.10 | 1.84E-01 | -1.07       | 0.04 | 1.00E-20 |
| EY2        | Yes           | Yes            | No                                     | Down                      | 0.44                             | 1.83E-19            | 1.5E-19    | -1.63                               | 0.13 | 4.54E-07 | -1.15       | 0.04 | 1.00E-20 | -1.10        | 0.11 | 1.09E-04 | -0.87    | 0.12 | 1.86E-03 | -1.39    | 0.17 | 4.84E-05 | -0.85        | 0.22 | 1.02E-02 | -1.93        | 0.12 | 1.00E-20 | -0.56       | 0.03 | 4.26E-04 |
| ENTPD3     | Yes           | Yes            | No                                     | Down                      | 0.43                             | 1.83E-19            | 1.5E-19    | -1.35                               | 0.12 | 1.70E-05 | -1.30       | 0.04 | 1.00E-20 | -0.71        | 0.11 | 5.57E-03 | -0.74    | 0.12 | 5.03E-03 | -1.18    | 0.16 | 2.18E-03 | -1.92        | 0.29 | 2.29E-04 | -1.31        | 0.11 | 6.59E-06 | -1.12       | 0.04 | 1.00E-20 |
| TMC5       | Yes           | Yes            | Yes                                    | Down                      | 0.43                             | 1.83E-19            | 1.5E-19    | -1.87                               | 0.13 | 4.54E-07 | -1.29       | 0.04 | 1.00E-20 | -0.69        | 0.11 | 4.93E-03 | -2.20    | 0.18 | 1.00E-20 | -0.67    | 0.14 | 1.39E-01 | -0.99        | 0.22 | 8.58E-02 | -1.10        | 0.10 | 3.77E-05 | -0.87       | 0.03 | 1.00E-20 |
| TIP3       | Yes           | Yes            | No                                     | Down                      | 0.43                             | 1.83E-19            | 0.00041    | -1.05                               | 0.11 | 1.68E-03 | -1.30       | 0.04 | 1.00E-20 | -1.48        | 0.12 | 9.16E-05 | -1.60    | 0.15 | 4.84E-05 | -0.92    | 0.15 | 3.30E-03 | -1.38        | 0.25 | 9.19E-04 | -0.90        | 0.10 | 3.72E-03 | -1.06       | 0.04 | 1.00E-20 |
| CRELD2     | Yes           | Yes            | No                                     | Down                      | 0.43                             | 1.83E-19            | 1.5E-19    | -1.36                               | 0.12 | 5.75E-04 | -1.16       | 0.04 | 1.20E-05 | -1.19        | 0.11 | 2.25E-03 | -1.60    | 0.15 | 1.64E-03 | -1.88    | 0.15 | 3.61E-03 | -1.13        | 0.23 | 2.61E-03 | -1.34        | 0.11 | 3.36E-04 | -1.05       | 0.04 | 9.47E-05 |
| TMC2       | No            | Yes            | No                                     | Up                        | 2.20                             | 3.58E-06            | 2E-05      | 0.87                                | 0.11 | 7.83E-03 | 1.05        | 0.04 | 2.98E-05 | 1.10         | 0.11 | 2.85E-02 | 1.40     | 0.14 | 2.09E-04 | 1.29     | 0.16 | 3.70E-01 | 1.78         | 0.28 | 2.04E-01 | 1.33         | 0.11 | 8.70E-03 | 1.29        | 0.03 | 7.88E-02 |
| FBXO16     | Yes           | Yes            | No                                     | Down                      | 0.43                             | 1.83E-19            | 1.5E-19    | -1.49                               | 0.12 | 1.41E-04 | -1.12       | 0.04 | 2.73E-06 | -1.68        | 0.13 | 2.45E-05 | -1.38    | 0.14 | 2.25E-04 | -0.86    | 0.15 | 1.08E-01 | -1.08        | 0.23 | 1.86E-01 | -1.51        | 0.11 | 1.33E-04 | -0.64       | 0.03 | 4.29E-03 |
| SPA17      | Yes           | Yes            | No                                     | Down                      | 0.43                             | 1.83E-19            | 4E-05      | -1.61                               | 0.13 | 5.45E-06 | -1.03       | 0.04 | 1.59E-06 | -0.59        | 0.11 | 2.87E-02 | -1.82    | 0.16 | 1.46E-04 | -1.29    | 0.16 | 2.44E-04 | -1.31        | 0.24 | 2.17E-03 | -1.27        | 0.10 | 2.66E-05 | -0.94       | 0.03 | 3.18E-06 |
| NEURL2     | No            | No             | No                                     | Up                        | 2.21                             | 1.14E-05            | 1.5E-19    | 1.26                                | 0.12 | 1.77E-03 | 0.82        | 0.04 | 1.78E-03 | 1.04         | 0.11 | 2.34E-02 | 0.84     | 0.12 | 1.29E-02 | 2.05     | 0.20 | 7.73E-02 | 1.82         | 0.28 | 9.52E-02 | 0.58         | 0.10 | 1.95E-01 | 0.73        | 0.03 | 5.29E-04 |
| SLC47A1    | Yes           | Yes            | Yes                                    | Down                      | 0.42                             | 1.83E-19            | 1.5E-19    | -1.89                               | 0.13 | 1.00E-20 | -1.31       | 0.04 | 1.00E-20 | -0.68        | 0.11 | 4.70E-03 | -1.12    | 0.13 | 1.51E-04 | -1.16    | 0.16 | 2.91E-04 | -1.33        | 0.24 | 5.02E-04 | -1.13        | 0.10 | 1.02E-05 | -1.28       | 0.04 | 1.00E-20 |
| IL20RA     | Yes           | Yes            | No                                     | Down                      | 0.42                             | 1.83E-19            | 1.5E-19    | -2.00                               | 0.14 | 1.00E-20 | -1.60       | 0.04 | 1.00E-20 | -1.07        | 0.11 | 1.17E-04 | -0.85    | 0.12 | 1.58E-03 | -0.83    | 0.15 | 1.64E-02 | -1.01        | 0.23 | 2.44E-02 | -1.58        | 0.11 | 1.82E-06 | -1.08       | 0.04 | 1.00E-20 |
| DHRS7B     | Yes           | Yes            | No                                     | Down                      | 0.41                             | 1.83E-19            | 6.7E-06    | -0.53                               | 0.10 | 1.07E-01 | -0.84       | 0.04 | 3.19E-04 | -1.67        | 0.13 | 9.70E-05 | -1.56    | 0.15 | 2.83E-03 | -1.09    | 0.15 | 7.83E-03 | -1.57        | 0.26 | 2.27E-03 | -1.43        | 0.11 | 1.34E-04 | -1.50       | 0.04 | 1.00E-20 |
| GALNT4     | Yes           | Yes            | No                                     | Down                      | 0.41                             | 1.83E-19            | 1.5E-19    | -1.37                               | 0.12 | 2.79E-05 | -1.22       | 0.04 | 1.00E-20 | -1.65        | 0.12 | 1.59E-06 | -1.31    | 0.14 | 7.75E-05 | -1.30    | 0.16 | 2.56E-04 | -0.89        | 0.22 | 1.26E-02 | -1.31        | 0.11 | 1.66E-05 | -1.16       | 0.04 | 1.00E-20 |
| STAP2      | Yes           | Yes            | No                                     | Down                      | 0.41                             | 1.83E-19            | 1.5E-19    | -1.05                               | 0.11 | 8.29E-04 | -1.23       | 0.04 | 4.54E-07 | -1.20        | 0.11 | 1.70E-03 | -1.28    | 0.13 | 5.24E-04 | -0.97    | 0.15 | 1.78E-02 | -1.07        | 0.23 | 1.68E-02 | -2.42        | 0.13 | 2.27E-07 | -1.11       | 0.04 | 1.14E-05 |
| HGD        | Yes           | Yes            | No                                     | Down                      | 0.40                             | 1.83E-19            | 1.5E-19    | -1.11                               | 0.11 | 4.86E-05 | -1.29       | 0.04 | 1.00E-20 | -1.59        | 0.12 | 1.59E-06 | -1.90    | 0.16 | 1.00E-20 | -0.80    | 0.15 | 7.49E-03 | -1.76        | 0.28 | 3.11E-04 | -1.05        | 0.10 | 2.35E-04 | -1.03       | 0.04 | 1.00E-20 |
| SCGB2A1    | Yes           | Yes            | Yes                                    | Down                      | 0.40                             | 1.83E-19            | 1.5E-19    | -1.32                               | 0.12 | 2.50E-06 | -1.29       | 0.04 | 1.00E-20 |              |      |          |          |      |          |          |      |          |              |      |          |              |      |          |             |      |          |

**Supplementary Table 4. Gene expression microarray studies for endometrial cancer available for analysis.**

EC - endometrial cancer

| Reference                                                | PMID        | Samples          | Data retrieval                                                                                                                        | Comment                                          |
|----------------------------------------------------------|-------------|------------------|---------------------------------------------------------------------------------------------------------------------------------------|--------------------------------------------------|
| Mutter et al 2001 Gynecol Oncol 83:177-185               | 11606070    | 10 EC; 4 Normal  | Via collaboration                                                                                                                     | Excluded - no EEC/NEEC information               |
| Moreno-Bueno et al 2003 Cancer Research 63:5697-5702     | 14522886    | 35 EC            | Via collaboration                                                                                                                     |                                                  |
| Risinger et al 2003 Cancer Research 63:6-11              | 12517768    | 35 EC; 7 Normal  | Downloaded from author website: <a href="http://home.ccr.cancer.gov/risingerdata1102">http://home.ccr.cancer.gov/risingerdata1102</a> |                                                  |
| Saidi et al 2004 Oncogene 23:6677-6683                   | 15247901    | 20 EC; 11 Normal | Provided by authors as supplementary data to publication                                                                              | Excluded - unable to update probe annotations    |
| Shedden et al 2005 Clin Cancer Res 11:2123-2131          | 15788657    | 18 EC            | Via collaboration                                                                                                                     |                                                  |
| Zorn et al 2005 Clin Cancer Res 11(18):6422-6430         | 16166416    | 35 EC; 7 Normal  | Via collaboration                                                                                                                     |                                                  |
| Huvila et al 2009 Int J Gynecol Oncol                    | 19823059    | 13 EC            | Via collaboration                                                                                                                     | Excluded - no EEC/NEEC information               |
| Salvesen et al 2009 PNAS 106(12):4834-9                  | 19261849    | 57 EC            | ArrayExpress accession: E-GEOD-14860                                                                                                  | Excluded - samples overlapped with other studies |
| Levan et al 2010 Gene Expr 14(6):361-70                  | 20635577    | 45 EC            | ArrayExpress accession: E-GEOD-21882                                                                                                  | Excluded - no EEC/NEEC information               |
| Mhawch-Fauceglia et al 2010 PLoS One 5(11):e15415        | 21079744    | 20 EC            | ArrayExpress accession: E-GEOD-23518                                                                                                  |                                                  |
| Day et al 2011 BMC Bioinformatics 12:213                 | 21619611    | 91 EC; 12 Normal | ArrayExpress accession: E-GEOD-17025                                                                                                  |                                                  |
| Mhawch-Fauceglia et al 2011 PLoS One 6(3):e18066         | 21448288    | 33 EC            | GEO accession: GSE24537                                                                                                               |                                                  |
| Krakstad et al 2012 PLoS One 7(12):e52795                | 23300780    | 69 EC            | ArrayExpress accession: E-MTAB-1358                                                                                                   | Excluded - samples overlapped with other studies |
| Mannelqvist et al 2012 BMC Cancer 12:169                 | 22559235    | 76 EC            | ArrayExpress accession: E-MTAB-1007                                                                                                   | Excluded - samples overlapped with other studies |
| Chiyoda et al 2012 Genes Chromosomes Cancer 51(3):229-39 | 22072501    | 38 EC; 8 sarcoma | GEO accession: GSE32507                                                                                                               |                                                  |
| Tangen et al 2014 PLoS One 9(5):e98069                   | 24849812    | 198 EC           | ArrayExpress accession: E-MTAB-2532                                                                                                   |                                                  |
| Kharmat et al 2014 Cancer Res 74(22):6519-30             | 25267067    | 63 EC            | ArrayExpress accession: E-GEOD-56026                                                                                                  |                                                  |
| expO                                                     | NA          | 75 EC            | ArrayExpress accession: E-GEOD-2109                                                                                                   |                                                  |
| Pappa et al 2015 PLoS One 10(11): e0142229               | 26559525    | 7 EC; 5 Normal   | ArrayExpress accession: E-GEOD-63678                                                                                                  | Excluded - no EEC/NEEC information               |
| E-GEOD-36389                                             | unpublished | 13 EC; 7 Normal  | ArrayExpress accession: E-GEOD-36389                                                                                                  | Excluded - no EEC/NEEC information               |
| TCGA                                                     | NA          | 54 EC            | Downloaded from TCGA website: <a href="https://tcga-data.nci.nih.gov/tcga/">https://tcga-data.nci.nih.gov/tcga/</a>                   |                                                  |
